# Supplementary material for: Distinct Genetic Signatures of Cortical and Subcortical Regions Associated with Human Memory
Source: eNeuro. 2019 Dec 13;6(6):ENEURO.0283-19.2019. doi: 10.1523/ENEURO.0283-19.2019 (PMC6917897; doi:10.1523/ENEURO.0283-19.2019)
Supplement: Extended Data Figure 5-1 — List of distinct and overlapping memory genes between cortex and subcortex. All memory genes derived from the prior GSEA step that are cortex specific, subcortex specific, or shared between cortex and subcortex. It includes motor genes as well. Download Figure 5-1, XLSX file. [file sup_enu-eN-NWR-0283-19-s07.xlsx]

## Sheet: Memory, genes
All cortex genes	All subcortex genes		Cortex-subcortex overlap	Cortex-specific	Subcortex-specific
PRKCD	BTBD9		ACTB	AANAT	AAAS
RAC1	AAK1		ACTR3	ABCA1	AAK1
HCK	DNAJC6		ANK3	ABI1	ABCF1
HLA-DRB5	UBQLN2		ANXA2	ACTG1	ABCG1
HLA-DRB4	SMAP1		AP2B1	ADRB2	ABHD6
HLA-DRB3	SCYL2		AP2S1	AHCY	ABR
HLA-DRB1	PAFAH1B1		APOE	AIF1	ACSBG1
CDC42	PTK2		ARF1	AMOT	ACSL4
LIMK1	NR2E1		ARPC1A	ANGPT1	ACTR2
HLA-DPA1	PTEN		ARPC2	ANGPT2	ADA
HLA-DQB1	FARP1		ARPC3	ANKRD17	ADORA2B
HLA-DPB1	KIDINS220		ARPC4	ANKRD28	ADRA1A
HLA-DRA	RAC1		ARPC5	APBB1	ADRA2A
FYN	MAP1B		ASF1A	AQP4	AFG3L2
VAV1	ARF4		ATAD2	ARHGAP6	AFMID
ACTG1	RBFOX2		ATAD2B	ARID2	AGT
PTK2	KLF7		ATP8A2	ARID4B	ALDH1L1
HSP90AA1	CTNNA2		BAIAP2	ARPC1B	ALDH4A1
MAPK3	RERE		CASK	ASS1	ALDH5A1
FCGR1B	SHANK3		CDH11	ATF5	ALDH6A1
CD247	OGDH		CDK5	ATP8A1	ALS2
CYFIP2	GABRB1		CHMP1A	ATRX	AMDHD1
NCKAP1	SLC4A10		CHMP4A	AZGP1	AMPD3
WIPF3	LHX6		CHMP4B	BAG1	AMPH
PLCG2	DCLK2		CLASP1	BAG4	ANK1
ARPC1B	NPY		CNIH2	BAHD1	AP1AR
ARPC4	FGFR1		CNIH3	BAZ1B	AP1G1
ARPC3	GNAQ		CORO1A	BAZ2A	AP2A1
HSP90AB1	HOMER1		DCC	BCDIN3D	AP2A2
FCGR3A	SSTR1		DICER1	BCL10	AP2M1
ACTR3	HOMER3		DLG2	BCOR	AP3B2
BAIAP2	HOMER2		DLG4	BEND3	AP3M1
FCGR2A	GRIK4		EFNB2	BHLHE40	AP3S1
SYK	GRIN2B		EFNB3	BIRC3	APBA1
VAV2	GRIA2		EXOSC10	BLM	APBA2
ELMO1	GRIA3		FAU	BRCA1	APC
ELMO2	ATP1A3		FEZF2	BRCC3	APOC1
DOCK1	GABRA2		FGFR1	BRK1	APP
MAPK1	ZNF219		FKBP1B	BTG2	ARC
ITGB1BP1	ALDH5A1		FYN	BTRC	ARF4
SMAD3	TACR2		GABRA5	C1QA	ARL6
TLR3	PPFIA3		GABRB1	C1QB	ARRB2
WNT5A	BRSK1		GABRB3	C3	ARX
HLA-G	LIN7C		GNAQ	C5	ASRGL1
CAMK2D	BAIAP3		GRIA1	CAB39	ATAD1
IRF7	PTPRN2		HMGB1	CABIN1	ATCAY
CALM1	SYN2		HMGB2	CALM1	ATG16L2
CALM2	APBA1		KIT	CALM2	ATG3
UBA52	CASK		KLHL12	CAMK2D	ATG4C
PLCG1	RAB3A		LIN28B	CARTPT	ATL1
ACTB	UNC13B		LPAR1	CCBE1	ATM
RIPK2	NLGN1		MAP2	CCL19	ATP1A3
HMGB1	STXBP1		MAPK1	CCL2	ATXN10
FKBP1A	BRAF		MCFD2	CD109	BAIAP3
FKBP1B	PFN2		MEF2C	CD24	BBS4
NOTCH1	SYN1		MIER1	CD247	BBS7
FGF2	GRIK5		NEDD4	CD38	BCL11B
PFN2	NAPA		NLGN1	CD55	BCL9
RHOA	KCNMB4		NPHS1	CD58	BDNF
S100A10	KCNC4		NPY	CD59	BHLHB9
WNT4	PTGER4		NR4A2	CD63	BICD2
NRP1	GPM6B		NR4A3	CD74	BMP6
AIF1	PER2		NRP1	CDC42	BNIP1
CCL19	MEF2C		NSF	CDC42SE2	BOK
JAK1	CAMK2A		NUP54	CDC7	BRAF
IFNGR2	GABRA5		PAK3	CDH13	BRSK1
STAT1	VDAC1		PFN2	CDKN2A	BRSK2
IFI30	HTR1A		PHF2	CEBPE	BSN
MT2A	DEAF1		PHF8	CELF1	BTBD3
TRIM22	NPY2R		PPP6R1	CENPK	BTBD9
HLA-H	GRM7		PRKCG	CEP112	C1QL3
HLA-C	USP46		PRKG1	CFD	C2CD4A
HLA-E	CLSTN3		PTEN	CFH	C2CD4C
MID1	CLSTN2		PTGER4	CHEK2	C2CD4D
GBP2	CLSTN1		PTK2	CHMP1B	CA7
RPS27A	RAPSN		RAB10	CHMP2B	CACNA1E
PSMD5	ARRB2		RAB14	CHMP6	CACNA1H
PSME3	TAC1		RAC1	CHRNA2	CACNA1I
PSMA3	PRKCE		RPL10A	CHUK	CACNB1
NRAS	RAB3B		RPL12	CLASP2	CACNB3
PSMB4	ADRA1A		RPL19	CLDN3	CACNG3
PSMB2	CA7		RPL21	CLIC1	CACNG8
PSMC5	DNM1		RPL23	CLIC2	CADPS
PSMC6	CNIH2		RPL23A	CNOT1	CADPS2
PSMC1	CNIH3		RPL24	CNOT8	CALU
UBE2D2	SLC17A7		RPL26	COLEC12	CAMK1
CHUK	SHC3		RPL27	CORO1C	CAMK2A
BTRC	GABRG2		RPL30	CRBN	CAMK2B
HRAS	DLGAP2		RPL31	CREBBP	CAMSAP2
LAT2	GLRB		RPL32	CREBZF	CAMSAP3
FBXW11	TMOD2		RPL34	CSF1R	CANX
PSMD14	CRHBP		RPL35	CSK	CARNS1
PSMD13	HTR2A		RPL35A	CSNK1A1	CASC3
NR4A3	PPP3CA		RPL37	CSNK2B	CASP3
UBE2N	SNAP91		RPL39	CTCF	CAT
TAB2	HTR4		RPL4	CTGF	CCK
FCGRT	GLS		RPL41	CTNNA3	CD9
CSK	GPR176		RPLP0	CTNNB1	CDH2
PAK3	PRKCG		RPLP1	CXADR	CDH4
PTEN	PDYN		RPS10	CYBA	CDK5R1
HAVCR2	KCNMB2		RPS12	CYFIP2	CDK6
TLR4	PCDHB2		RPS13	CYLD	CDON
TLR2	GABRB3		RPS14	DACT1	CECR2
LY96	DLGAP1		RPS15A	DACT3	CELF4
GSTM2	GABRA3		RPS17	DCLRE1A	CELSR2
SRI	CHRM2		RPS18	DCLRE1B	CELSR3
PLN	CHRM3		RPS20	DCN	CHCHD3
TRIM27	CHRM1		RPS23	DDX1	CHL1
NTSR1	CACNB1		RPS25	DDX60	CHMP7
CLIC2	CACNB3		RPS26	DEK	CHN1
SLC30A1	MBP		RPS27	DFFB	CHRM1
PTGER3	NPTX2		RPS27A	DHX58	CHRM2
APOE	HTR3B		RPS29	DLC1	CHRM3
PDGFRA	PCDH8		RPS3A	DLG1	CHRNA7
CTGF	SST		RPS4X	DNA2	CHRNB2
SWAP70	CPNE6		RPS4Y1	DNAJA2	CLDN11
TPM1	BSN		RPS6	DNAJA4	CLSTN1
BAG4	KCNQ2		RPS9	DNAJB1	CLSTN2
PPM1E	KCNQ5		SETDB1	DNAJC7	CLSTN3
LPAR1	KCNN1		SHANK1	DND1	CLTB
FHOD1	EGR3		SLIT1	DNMT1	CNOT2
AMOT	DTNA		SLIT3	DNMT3A	CNOT6
TAC1	PTPRS		SNAP91	DNMT3B	CNP
WNT11	GABBR2		SOS1	DOCK1	CNR1
SHANK1	APBA2		SPCS2	DOT1L	CNTN1
ANXA2	AMPH		SRP9	EDN1	CNTN2
CLASP1	RTN3		TAC1	EIF2AK1	CNTNAP1
CLASP2	CHRNA7		TET1	ELMO1	COMT
SULF2	CACNA1E		TRAPPC2	ELMO2	CPEB3
SEMA5A	DLG2		TRIM27	EMD	CPLX2
ROBO1	DLG3		TSKU	EPC1	CPNE6
EFNB2	GSK3A		UHRF1	ERCC4	CRHBP
CCL2	FLOT2		UPF1	ERCC6	CRK
ASS1	SSTR2		VAMP7	EXD2	CRMP1
AQP4	USP14		WNT5A	EYA3	CSNK1D
SYNCRIP	GNA15			EZH2	CSPG5
CD58	NLGN2			F12	CTNNA2
PSMD1	CACNG8			F8	CXCR4
JUN	CACNG3			FAN1	DAB1
FOS	PRKACA			FBXW11	DAB2IP
PSMB3	DAPK1			FCGR1B	DAPK1
MAP2K4	NETO2			FCGR2A	DBN1
SHC1	ATAD1			FCGR3A	DCLK1
SOS1	CSPG5			FCGRT	DCLK2
KIT	CELF4			FGF2	DCP1A
PSMD12	LRP8			FHOD1	DCPS
PSMB10	NLGN4Y			FKBP1A	DCTPP1
MAPK8	GNAI1			FLNA	DDX3Y
CD24	NRXN1			FMR1	DEAF1
SKAP1	NTRK3			FNBP1L	DENND1A
PTPRC	LRRC4			FOLR1	DIS3
PIK3CD	CDH2			FOS	DLG3
TNFRSF21	LRRC4B			FZD1	DLGAP1
MNDA	C1QL3			FZD7	DLGAP2
SPG21	CAMK1			GBF1	DLL1
SPPL3	BHLHB9			GBP2	DNAJC5
CD38	ETV5			GJA1	DNAJC6
RFTN2	RAPGEF2			GLMN	DNASE2
ZAP70	EIF2AK4			GOLPH3	DNER
C5	SRF			GPX1	DNM1
PYDC1	SIPA1L1			GRK6	DOC2A
IL1B	NEUROD2			GSTM2	DOC2B
TLR1	NFATC4			GULP1	DPYSL4
TREM2	CPEB3			H2AFJ	DROSHA
ARPC1A	JPH4			H2AFZ	DSCAM
ABI1	ITPKA			HAT1	DSCAML1
ARPC5	PICK1			HAVCR2	DTNA
ARPC2	LZTS1			HCK	DUSP10
BRK1	ABHD6			HDAC4	DUT
MYO10	NRGN			HDAC5	DYNC1I1
CORO1C	RIN1			HDAC6	EDC3
MARCO	HRH1			HDAC8	EEA1
COLEC12	YWHAG			HELLS	EFNA3
SCFD1	YWHAH			HELQ	EFNA4
CHMP4B	SYNGAP1			HIST1H1A	EFNB1
CHMP4A	RAB11A			HIST1H1C	EGR2
ST13	KIT			HIST1H1D	EGR3
HSPA1A	SYNGR1			HIST1H1E	EHD3
BAG1	SYP			HIST1H2AB	EIF1
DNAJC7	CAMK2B			HIST1H2AE	EIF2AK4
DNAJB1	SLC8A2			HIST1H2AH	EIF2B4
DNAJA4	ARC			HIST1H2BG	EIF2B5
DNAJA2	RASGRF1			HIST1H3A	EIF2D
HSPA6	JPH3			HIST1H3B	EIF2S2
PAWR	DBN1			HIST1H3C	EIF3A
NEDD4L	SHISA7			HIST1H3D	EIF3D
OAZ1	SHISA6			HIST1H3E	EIF3E
OAZ2	NETO1			HIST1H3F	EIF3F
OAZ3	NPTN			HIST1H3G	EIF3G
CRBN	PLK2			HIST1H3H	EIF3H
STK39	SHANK2			HIST1H3J	EIF3J
KCNAB1	RGS14			HIST1H4A	EIF3L
ANK3	GRIK2			HIST1H4B	EIF4A2
KCNQ1	GRIN1			HIST1H4D	EIF4B
CAB39	GRIN2A			HIST1H4E	EIF4E2
NEDD4	GRIA1			HIST1H4F	EIF4H
PPIF	GRM5			HIST1H4H	EIF6
GRK6	PTK2B			HIST1H4I	EMX1
YWHAQ	CHRNB2			HIST1H4J	ENPP1
CEP112	EPHB2			HIST1H4K	ENPP4
CDK5	DCLK1			HIST3H3	EPG5
NLGN1	NFIB			HIST4H4	EPHA4
RELN	DCC			HLA-C	EPHA5
DLG1	TSKU			HLA-DPA1	EPHA6
DLG2	FBXO45			HLA-DPB1	EPHA7
DLG4	NR4A2			HLA-DQB1	EPHB2
LRRTM1	CDH11			HLA-DRA	EPHX2
NPHS1	EPHA4			HLA-DRB1	EPS15
AHCY	PLXNA4			HLA-DRB3	ERBB3
RASGRP1	SLIT2			HLA-DRB4	ERN1
STARD13	RAB8A			HLA-DRB5	ESPL1
NR2F2	DLG4			HLA-E	ETV5
SYNJ2BP	NLGN3			HLA-G	EXOC2
VASH1	GSK3B			HLA-H	EXOC3L1
MAP2K5	BAIAP2			HMOX1	EXOC4
PTPN23	PPP3CB			HP1BP3	EXOC6
HDAC5	EGR2			HR	EXOC6B
ANGPT2	TNR			HRAS	EXOSC8
CSNK2B	MAPK1			HSP90AA1	EXT1
PTPRR	NCAM1			HSP90AB1	FA2H
PTPRM	FLOT1			HSPA1A	FARP1
PTPRG	LGI1			HSPA6	FBXO45
STRAP	SLITRK5			HSPB1	FGF1
CD63	SLC9A6			ICAM5	FLOT1
SP100	SRGAP2			ID2	FLOT2
DCN	FYN			IDE	FLRT2
MMRN2	PAK3			IFI30	FLRT3
CXADR	MAP6			IFITM1	GABBR2
MYL9	HPRT1			IFITM2	GABRA2
FLNA	MAP2			IFITM3	GABRA3
P2RY12	TMEM106B			IFNGR2	GABRG2
METAP1	BTBD3			IL1B	GAL3ST1
TLN1	CELSR2			IL33	GALT
STXBP3	DSCAM			IL4R	GDAP1
SLC7A11	MAPK8IP2			INO80	GIT1
CLIC1	MINK1			INSR	GLRB
RAP2B	SHANK1			IRF7	GLS
CTNNA3	APP			ITGAM	GNA15
MEGF11	CDK5R1			ITGB1BP1	GNAI1
HSPB1	DPYSL4			JAK1	GNAI3
ARHGAP6	ZNF335			JARID2	GOSR2
TMEFF2	CNTNAP1			JUN	GPM6A
PTGER4	EMX1			KANK1	GPM6B
DLC1	GPM6A			KAT2A	GPR176
S1PR1	MAP1S			KCNAB1	GPRIN1
GJA1	SPAST			KCNQ1	GRB2
F12	UCHL1			KDM4A	GRIA2
PROS1	DAB2IP			KDM4D	GRIA3
PRKG1	SLITRK1			KDR	GRIK2
CD109	SLITRK4			KLF13	GRIK4
WFDC1	SLITRK3			KLK5	GRIK5
EDN1	FLRT2			KLK7	GRIN1
CASK	FLRT3			KYNU	GRIN2A
ADRB2	BDNF			LAT2	GRIN2B
PRKCG	EPHA7			LEO1	GRIP1
GABRB3	WNT5A			LIMK1	GRM5
GABRA5	PLXNA2			LRRTM1	GRM7
SULF1	NR4A3			LY86	GSK3A
SLITRK6	SLIT1			LY96	GSK3B
FZD1	CHN1			MAFB	GSTP1
FZD7	PLXNC1			MAP2K4	GSTZ1
EMD	PLXNA1			MAP2K5	H1F0
KANK1	LHX3			MAPK3	HDAC11
SFRP2	EPHA5			MAPK8	HERC1
WWTR1	EFNA4			MAPKAP1	HOMER1
GNAQ	EFNB2			MARCO	HOMER2
DACT3	EFNB1			MBD1	HOMER3
DACT1	EFNB3			MBD2	HPRT1
RGS19	EFNA3			MBD3	HRH1
RGS20	UNC5A			MCM2	HSD17B14
TSKU	UNC5D			MCM8	HSD17B6
ATF5	ISL1			MDC1	HTR1A
GABRB1	L1CAM			MECP2	HTR2A
BTG2	CHL1			MEGF11	HTR3B
TCTN1	ZNF280A			MEIS1	HTR4
MAP2	ZNF280B			METAP1	HTT
ROBO2	ISPD			METTL3	ICMT
FEZF2	SEMA5B			MFGE8	IGF1
NPY	CDH4			MID1	IGSF9
NR4A2	LHX2			MIS18BP1	IL13RA2
FGFR1	PTPRA			MMRN2	ILK
DCC	SOS1			MNDA	ISG20
CDH11	SEMA4F			MSL3P1	ISL1
SLIT1	ANK3			MT2A	ISPD
SLIT3	MAPK8IP3			MTF2	ITPKA
MAPKAP1	SPTBN5			MYBBP1A	JAM3
TNFRSF14	BCL11B			MYC	JPH3
PTPN11	EXT1			MYD88	JPH4
EFNB3	GRB2			MYL9	KCNB1
PRR5	PTPRO			MYO10	KCNC4
CCBE1	RANBP9			MYO7A	KCNH1
RSPO3	CELSR3			N4BP2L2	KCNJ10
SEMA3E	TGFB2			NAP1L2	KCNMB2
ANGPT1	USP33			NASP	KCNMB4
KDR	CRMP1			NCKAP1	KCNN1
PARVA	PLXNA3			NCOR1	KCNQ2
CDH13	NRP1			NCOR2	KCNQ5
TEK	FEZF2			NEDD4L	KIDINS220
IFITM3	ARX			NFKBIA	KIF3A
IFITM1	SLIT3			NHEJ1	KIF3B
IFITM2	ALS2			NMU	KIF3C
KYNU	AFG3L2			NOTCH1	KIFAP3
HMOX1	NPTX1			NR2F2	KLF15
CSF1R	LRFN3			NR2F6	KLF7
IL33	LRFN2			NRAS	KLK6
CD74	LRFN5			NTSR1	L1CAM
IL4R	LRFN4			OAZ1	LAMA2
PRKCA	RAPH1			OAZ2	LAMB2
ZC3HAV1	DSCAML1			OAZ3	LDLRAP1
ANKRD17	ATL1			P2RX6	LEF1
LY86	USP9X			P2RY12	LGI1
DHX58	ATP8A2			PAF1	LHX2
KLK5	RTN4R			PALB2	LHX3
KLK7	BRSK2			PAPD7	LHX6
PUM2	NDN			PARVA	LIF
CYBA	NUMB			PAWR	LIN7A
DDX60	LINGO1			PAXIP1	LIN7C
SASH1	RAB10			PCNA	LINGO1
SSC5D	NUMBL			PDCD6IP	LRFN2
ABCA1	NTNG2			PDGFRA	LRFN3
EIF2AK1	LRRN2			PECAM1	LRFN4
CDC42SE2	CCK			PER1	LRFN5
SRPX	SOD1			PIAS4	LRP8
VAMP7	RAPGEF4			PIF1	LRRC4
CSNK1A1	SMPD3			PIK3C2A	LRRC4B
TUSC2	SNX19			PIK3CD	LRRN2
RAB34	EXOC3L1			PINX1	LSM2
CORO1A	NEUROD1			PKD2L1	LSM5
PECAM1	RAB11FIP2			PLCG1	LSM6
CEBPE	PTPRN			PLCG2	LSM7
TUB	FKBP1B			PLN	LTBP4
RAB14	LTBP4			PML	LYN
ICAM5	UBE2Q1			POLD1	LZTS1
MYO7A	VIP			POLD3	MAGOH
MFGE8	EXOC6B			POLL	MAL
TGM2	EXOC4			POLN	MAP1B
GULP1	EXOC6			POLR1D	MAP1S
SKAP2	EXOC2			PPIF	MAP2K3
CFD	SNPH			PPM1E	MAP6
CFH	SCFD2			PPP1CB	MAPK8IP2
C3	RAB8B			PRIM1	MAPK8IP3
CYLD	EEA1			PRKAB1	MAPK9
MYD88	VPS41			PRKCA	MARK2
ITGAM	VTI1A			PRKCD	MBP
BIRC3	STX6			PRMT7	METRN
UNC93B1	RAB7A			PROS1	MINK1
VSIG4	VPS11			PRR5	MLH1
C1QB	VPS39			PSMA3	MLYCD
C1QA	VAMP4			PSMB10	MPP5
SUSD4	VPS8			PSMB2	MSTO1
CD55	STX12			PSMB3	MTAP
TNIP3	GNAI3			PSMB4	MTIF2
FNBP1L	NKD2			PSMC1	MTMR2
TFG	VCPIP1			PSMC5	MTPAP
SAR1B	BNIP1			PSMC6	MUTYH
ARF1	VAMP7			PSMD1	MXRA8
SERPINA1	STX7			PSMD12	MYH9
F8	OPA1			PSMD13	MYO1C
AP2S1	VPS33A			PSMD14	MYOD1
ATP8A2	VPS33B			PSMD5	NAPA
ATP8A1	YKT6			PSME3	NCAM1
GRIA1	GOSR2			PTGER3	NCK2
TRAPPC2	WIPI2			PTPN11	NDN
ANKRD28	TECPR1			PTPN2	NDRG1
CNIH2	EPG5			PTPN23	NEIL1
CNIH3	CHCHD3			PTPRC	NETO1
MCFD2	GDAP1			PTPRG	NETO2
PIK3C2A	SORT1			PTPRM	NEUROD1
PPP6R1	VPS35			PTPRR	NEUROD2
PDCD6IP	VPS26B			PUM2	NFATC4
VPS37C	EHD3			PYDC1	NFIB
VPS37B	CORO1A			RAB1A	NKD2
RAB1A	RAB6B			RAB34	NKX2-2
VPS4B	VPS13A			RAB3GAP1	NKX6-1
SEC24A	RAB14			RAB3GAP2	NKX6-2
VAPB	TRIM27			RAD51C	NLGN2
SEC24D	TBC1D10A			RAD52	NLGN3
FOLR1	TBC1D10B			RAD54B	NLGN4Y
SEC24C	SNX2			RAD54L	NPTN
SNX3	EPS15			RAP2B	NPTX1
SNAP91	RAB9B			RASGRP1	NPTX2
CHMP1B	TBC1D14			RBBP4	NPY2R
CHMP1A	TBC1D17			RBM15	NR1D1
CD59	TBC1D5			RBM4	NR2E1
GBF1	MYH9			RBM4B	NRGN
AP2B1	WNT10B			RECQL	NRXN1
NSF	PLEKHO1			RECQL5	NT5C
TRAPPC2L	SKI			RELN	NT5E
TMED10	KCNH1			RFTN2	NT5M
TSG101	SMYD3			RGS19	NTHL1
KLHL12	BCL9			RGS20	NTNG2
VTA1	P2RX2			RHOA	NTRK3
CHMP2B	CDON			RIF1	NUDT12
CHMP6	IGF1			RIPK2	NUDT16
GOLPH3	RYR1			ROBO1	NUDT5
RPL4	XK			ROBO2	NUMB
RPL30	MYOD1			RPA3	NUMBL
RPL32	NPHS1			RPL22	NUP107
RPL31	CLTB			RPL26L1	NUP133
RPL34	AP2A1			RPL27A	NUP160
RPL6	AP2S1			RPL28	NUP188
RPL36	AP2M1			RPL29	NUP210
RPL35	AP2A2			RPL36	NUP43
RPL37	AP2B1			RPL6	OGDH
RPL39	LYN			RPS2	OLIG1
RPL21	WASL			RPS21	OLIG2
RPL23	ACTR3			RPS24	OPA1
RPL22	ARPC1A			RSPO3	OPHN1
RPL24	ARPC4			RTEL1	P2RX2
RPL27	ARPC5			S100A10	PACS2
RPL26	ARPC2			S1PR1	PACSIN1
RPL29	ARPC3			SAR1B	PAFAH1B1
RPL28	ACTR2			SASH1	PAN2
RPS4Y1	CRK			SCFD1	PAPD4
RPL41	ROCK2			SEC24A	PARD3
RPLP1	ACTB			SEC24C	PCBD1
RPLP0	EPHA6			SEC24D	PCBP2
SRP54	GIT1			SEC61G	PCDH8
SRP9	SDCBP			SEC62	PCDHB2
RPL12	RASA1			SEC63	PCLO
RPS15A	ATCAY			SEMA3E	PDE10A
RPS2	DAB1			SEMA5A	PDE11A
RPL19	BBS4			SERPINA1	PDE1B
RPL10A	NCK2			SF3B1	PDE3A
RPS9	PRKG1			SFRP2	PDE7B
RPS6	ACSL4			SHC1	PDE8A
RPL35A	GRIP1			SHPRH	PDE9A
RPL23A	IGSF9			SIRT1	PDYN
RAB10	NEDD4			SIRT4	PER2
RPS14	STMN3			SKAP1	PHGDH
RPS17	ZFYVE27			SKAP2	PIBF1
RPS18	RAB35			SLC30A1	PICK1
SEC62	WDR5			SLC7A11	PIP5K1C
RPS10	RTN4RL2			SLITRK6	PLCB1
RPS13	RTN4RL1			SMAD3	PLEKHO1
RPS12	APC			SMARCAD1	PLK2
SEC63	ATXN10			SMARCC1	PLLP
RPS26	HERC1			SMC2	PLP1
RPS25	UHMK1			SMC5	PLXNA1
RPS27	CALU			SMCHD1	PLXNA2
RPS29	RXRA			SNX3	PLXNA3
RPL27A	GPRIN1			SP100	PLXNA4
RPS20	TBC1D24			SPCS1	PLXNC1
RPS21	CAMSAP2			SPG21	PMP22
RPS24	CAMSAP3			SPPL3	PNP
RPS23	CNTN1			SQSTM1	PNPT1
SEC61G	MAPK9			SRI	POLR2G
SPCS2	PPP1R9B			SRP19	POM121
SPCS1	CNR1			SRP54	POMZP3
RAB3GAP2	ARF1			SRPK1	PON3
FAU	KCNB1			SRPX	POU3F2
RAB3GAP1	ABR			SRRT	PPARGC1A
SRP19	IL13RA2			SSC5D	PPFIA3
RPS4X	ADORA2B			ST13	PPP1R9B
RPS3A	AP1G1			STARD13	PPP2R2A
RPL26L1	RAB3D			STAT1	PPP3CA
MEF2C	RAB15			STK39	PPP3CB
ZBTB1	SNX4			STRAP	PRKAA1
N4BP2L2	SYTL5			STXBP3	PRKACA
HIST1H4K	RPH3AL			SULF1	PRKCE
HIST1H4A	SYT14			SULF2	PRPF18
HIST1H4B	RIMS4			SUSD4	PRTFDC1
HIST1H4H	RAB5A			SUV39H2	PRX
HIST1H4I	ADRA2A			SUZ12	PSRC1
HIST1H4J	SPINK8			SWAP70	PTK2B
HIST1H4D	PLCB1			SYK	PTPRA
HIST1H4E	CACNA1H			SYNCRIP	PTPRN
HIST1H4F	SCAMP5			SYNJ2BP	PTPRN2
HIST4H4	CACNA1I			TAB2	PTPRO
HMGB2	POMZP3			TAF1A	PTPRS
SMC2	CDK5			TAF1C	QDPR
SRPK1	TOR1A			TAF1D	QKI
DFFB	SNCA			TARBP2	QPRT
PAF1	STX1B			TAS1R1	RAB11A
TSPYL1	STX1A			TAS2R10	RAB11FIP2
CDKN2A	SYT12			TAS2R13	RAB15
HIST1H1D	SYT5			TAS2R14	RAB1B
HIST1H1E	SYT1			TAS2R19	RAB27B
HIST1H1A	SYT11			TAS2R20	RAB35
MCM2	SYTL2			TAS2R30	RAB3A
MIS18BP1	SYT17			TAS2R31	RAB3B
CENPK	C2CD4A			TAS2R4	RAB3D
NASP	C2CD4C			TAS2R43	RAB5A
RBBP4	DOC2A			TAS2R45	RAB6A
CABIN1	C2CD4D			TAS2R5	RAB6B
TSPYL2	SYT4			TAS2R50	RAB7A
SMARCC1	SYT3			TCF7L2	RAB8A
TSPYL4	DOC2B			TCTN1	RAB8B
SUV39H2	SYT7			TDG	RAB9B
SHPRH	UNC13A			TEK	RABGEF1
ARID2	RIMS1			TERT	RAN
HIST1H2BG	VAMP2			TFAP2C	RANBP9
HP1BP3	STX3			TFG	RAPGEF2
HIST1H1C	SNAP25			TFIP11	RAPGEF4
ATRX	CPLX2			TGM2	RAPH1
HDAC8	PIP5K1C			TINF2	RAPSN
NAP1L2	SYNJ1			TLE2	RASA1
MYC	LIN7A			TLN1	RASGRF1
LEO1	SNAP29			TLR1	RBFOX2
CREBBP	DNAJC5			TLR2	RERE
TLE2	PCLO			TLR3	RGS14
TCF7L2	CADPS2			TLR4	RHOT1
CARTPT	CADPS			TMED10	RIMS1
ZBTB16	OPHN1			TMEFF2	RIMS4
NFKBIA	DENND1A			TNFRSF14	RIN1
MAFB	CANX			TNFRSF21	RNH1
RBM15	SH3GL2			TNIP3	ROCK2
KLF13	PACSIN1			TNNT2	RPH3AL
MEIS1	RAB6A			TNRC6A	RPL10
PTPN2	AP1AR			TNRC6C	RPL11
TAS2R20	AP3S1			TONSL	RPL13
PKD2L1	AP3M1			TPM1	RPL13A
TAS2R10	AP3B2			TRAF2	RPL14
TAS2R13	WDR43			TRAPPC2L	RPL17
TAS2R14	HTT			TREM2	RPL18
TAS2R19	ARL6			TRIM22	RPL18A
AZGP1	TRAPPC2			TRIM28	RPL3
TAS2R43	TRAPPC5			TSG101	RPL36A
TAS2R45	TRAPPC9			TSPYL1	RPL37A
TAS2R30	MCFD2			TSPYL2	RPL38
TAS2R31	PPP6R1			TSPYL4	RPL5
TAS2R50	RAB1B			TUB	RPL7
TAS2R5	KIFAP3			TUSC2	RPL7A
TAS2R4	CSNK1D			UBA52	RPL8
TAS1R1	RAB27B			UBE2D2	RPL9
NMU	BBS7			UBE2N	RPS11
AANAT	DYNC1I1			UBR2	RPS15
RBM4	SEC23IP			UIMC1	RPS16
NR2F6	NSF			UNC93B1	RPS19
ID2	KLHL12			USP2	RPS28
PER1	KIF3B			VAPB	RPS3
PPP1CB	KIF3A			VASH1	RPS5
USP2	SHROOM2			VAV1	RPS7
BHLHE40	TRAPPC6B			VAV2	RPS8
RBM4B	CLASP1			VPS37B	RPSA
PML	SEH1L			VPS37C	RTN3
INSR	RHOT1			VPS4B	RTN4R
NUP54	EIF6			VSIG4	RTN4RL1
PRKAB1	SDAD1			VTA1	RTN4RL2
CLDN3	SPICE1			WFDC1	RTP4
BCL10	BICD2			WIPF3	RXRA
IDE	ESPL1			WNT11	RYR1
TNNT2	MSTO1			WNT4	S100B
HR	CHMP1A			WWTR1	SCAMP5
SQSTM1	KIF3C			XRCC1	SCFD2
CHRNA2	PIBF1			YWHAQ	SCYL2
TRAF2	MARK2			ZAP70	SDAD1
P2RX6	UBE2B			ZBTB1	SDCBP
TONSL	YWHAZ			ZBTB16	SEC23IP
SMC5	PSRC1			ZC3HAV1	SEH1L
CHEK2	CHMP7			ZNF304	SEMA4F
RECQL	SPRY2			ZNRD1	SEMA5B
EXD2	SPRY1				SERINC5
PAXIP1	RAN				SH3GL2
BRCC3	ASF1A				SH3TC2
NHEJ1	MIER1				SHANK2
XRCC1	SETDB1				SHANK3
CDC7	PHF2				SHC3
INO80	PHF8				SHISA6
RAD54B	TET1				SHISA7
RECQL5	ATAD2				SHROOM2
RAD54L	UHRF2				SIPA1L1
APBB1	UHRF1				SIRT2
RPA3	ATAD2B				SKI
DCLRE1B	EIF2B4				SLC17A7
SMARCAD1	ZNF396				SLC4A10
PIAS4	MTMR2				SLC8A2
BLM	ZNF24				SLC9A6
DDX1	KLK6				SLIT2
HELQ	UGT8				SLITRK1
PALB2	PRX				SLITRK3
MCM8	PLLP				SLITRK4
POLL	CLDN11				SLITRK5
PAPD7	ACSBG1				SMAP1
FAN1	CXCR4				SMG1
KDM4D	JAM3				SMG5
POLN	TSC1				SMPD3
EYA3	MAL				SMYD3
MDC1	QKI				SNAP25
UIMC1	SERINC5				SNAP29
RIF1	GAL3ST1				SNCA
RAD52	ILK				SNPH
DCLRE1A	PMP22				SNX19
TINF2	CNP				SNX2
TFIP11	SOX8				SNX4
UPF1	SOX10				SOD1
PIF1	NKX6-1				SORT1
RTEL1	BOK				SOX10
PCNA	OLIG1				SOX11
PRIM1	OLIG2				SOX2
PINX1	SOX2				SOX8
POLD3	LIF				SPAST
POLD1	DNER				SPICE1
DNA2	METRN				SPINK8
RAD51C	STAT3				SPRY1
ERCC4	DUSP10				SPRY2
HIST3H3	KLF15				SPTBN5
BRCA1	LEF1				SREBF1
KDM4A	ERBB3				SRF
BCOR	S100B				SRGAP2
HIST1H3C	PARD3				SRP68
DND1	DICER1				SSR2
NCOR2	SIRT2				SST
NCOR1	MPP5				SSTR1
FMR1	POU3F2				SSTR2
BCDIN3D	NDRG1				STAT3
TRIM28	LAMA2				STMN3
ASF1A	SH3TC2				STX12
SIRT1	HDAC11				STX1A
ATAD2	SOX11				STX1B
ZNF304	MXRA8				STX3
MIER1	PHGDH				STX6
SETDB1	GSTP1				STX7
UHRF1	CDK6				STXBP1
DNMT1	DLL1				SYN1
PHF2	LAMB2				SYN2
PHF8	NKX2-2				SYNGAP1
TET1	LPAR1				SYNGR1
ATAD2B	TSPAN2				SYNJ1
HIST1H3J	FA2H				SYP
HIST1H3A	PLP1				SYT1
HIST1H3F	NKX6-2				SYT11
HIST1H3G	CNTN2				SYT12
HIST1H3H	KCNJ10				SYT14
HIST1H3B	CD9				SYT17
HIST1H3D	APOE				SYT3
HIST1H3E	PPARGC1A				SYT4
HAT1	NR1D1				SYT5
BAHD1	LDLRAP1				SYT7
EPC1	SREBF1				SYTL2
SUZ12	AGT				SYTL5
CREBZF	FGF1				TACR2
MECP2	TNF				TBC1D10A
JARID2	ABCG1				TBC1D10B
MTF2	BMP6				TBC1D14
DNMT3B	PRKAA1				TBC1D17
DOT1L	APOC1				TBC1D24
MSL3P1	RNH1				TBC1D5
SIRT4	ZC3H12A				TECPR1
HIST1H2AE	XRN1				TET2
HIST1H2AB	ATM				TGFB2
HIST1H2AH	ZCCHC11				TMEM106B
UBR2	ZHX2				TMOD2
H2AFZ	PRPF18				TNF
DNMT3A	EXOSC8				TNR
BEND3	DCPS				TOR1A
MYBBP1A	MLH1				TPR
ZNRD1	EDC3				TRAM1
POLR1D	NUDT16				TRAM1L1
TAF1C	MTPAP				TRAPPC5
DEK	ERN1				TRAPPC6B
ERCC6	ZFP36L2				TRAPPC9
METTL3	ZFP36L1				TSC1
DICER1	PNPT1				TSPAN2
BAZ2A	LSM5				UBE2B
TERT	LSM2				UBE2Q1
EZH2	PAN2				UBQLN2
CTCF	ISG20				UCHL1
HELLS	LSM7				UGT8
PRMT7	LIN28B				UHMK1
BAZ1B	CNOT6				UHRF2
KAT2A	LSM6				UNC13A
SRRT	CNOT2				UNC13B
EXOSC10	DIS3				UNC5A
SF3B1	PAPD4				UNC5D
MBD3	DROSHA				UPF3A
MBD1	POLR2G				UPF3B
MBD2	PPP2R2A				UPP1
TARBP2	MAGOH				USP14
CTNNB1	UPF3B				USP33
ARID4B	UPF3A				USP46
SMCHD1	DCP1A				USP9X
TFAP2C	SMG1				VAMP2
GLMN	SMG5				VAMP4
LIN28B	UPF1				VCPIP1
CNOT1	EXOSC10				VDAC1
CNOT8	CASC3				VIP
CELF1	EIF3E				VPS11
H2AFJ	NUDT5				VPS13A
GPX1	PNP				VPS26B
HDAC4	MLYCD				VPS33A
HDAC6	ASRGL1				VPS33B
TAF1D	MTAP				VPS35
TDG	NEIL1				VPS39
TAF1A	PDE1B				VPS41
TNRC6C	NTHL1				VPS8
TNRC6A	AFMID				VTI1A
	ALDH6A1				WASL
	PDE3A				WDR43
	ADA				WDR5
	QPRT				WIPI2
	TET2				WNT10B
	AMPD3				XK
	HSD17B6				XRN1
	NT5C				YKT6
	NT5E				YWHAG
	CARNS1				YWHAH
	NT5M				YWHAZ
	ALDH4A1				ZC3H12A
	ALDH1L1				ZCCHC11
	COMT				ZFP36L1
	ENPP1				ZFP36L2
	ENPP4				ZFYVE27
	PDE8A				ZHX2
	NUDT12				ZNF219
	PDE9A				ZNF24
	AMDHD1				ZNF280A
	EPHX2				ZNF280B
	QDPR				ZNF335
	H1F0				ZNF396
	HMGB2
	HMGB1
	CASP3
	UPP1
	CAT
	DNASE2
	DCTPP1
	PRTFDC1
	PON3
	GALT
	HSD17B14
	CECR2
	PDE11A
	PCBD1
	MUTYH
	DUT
	GSTZ1
	PDE10A
	PDE7B
	SPCS2
	SRP9
	CHMP4B
	CHMP4A
	RPL4
	RPL5
	RPL30
	RPL3
	RPL31
	RPL34
	RPL8
	RPL9
	RPL7
	RPS15
	RPS14
	RPS17
	RPS16
	RPL18A
	RPS19
	RPS18
	RPL35
	RPL37
	RPS11
	RPS10
	RPL39
	RPS13
	RPS12
	RPL21
	RPL23
	RPL24
	RPL27
	RPL26
	RPS4Y1
	RPL41
	RPS26
	RPS25
	RPS28
	RPS27
	RPS29
	RPS20
	RPS23
	RPLP1
	RPLP0
	RPL10
	RPL12
	RPL11
	RPS15A
	RPL14
	RPS3
	RPL13
	RPS27A
	RPL18
	RPL17
	RPL19
	FAU
	RPS9
	RPS7
	RPS8
	RPS5
	RPS6
	RPSA
	RPS4X
	RPL7A
	RPL13A
	RPS3A
	RPL37A
	RPL36A
	RPL35A
	RPL23A
	NUP54
	NUP107
	NUP210
	POM121
	AAAS
	NUP188
	MAP2K3
	NUP160
	TPR
	ATG16L2
	NUP133
	NUP43
	RPL32
	RPL38
	RPL10A
	RABGEF1
	ATG3
	ANK1
	ICMT
	TRAM1
	ANXA2
	SSR2
	PACS2
	TRAM1L1
	SRP68
	RTP4
	ATG4C
	MYO1C
	EIF4A2
	EIF2D
	EIF1
	EIF2B5
	EIF2S2
	DDX3Y
	EIF4E2
	MTIF2
	EIF4H
	EIF4B
	ABCF1
	EIF3L
	EIF3J
	EIF3H
	PCBP2
	EIF3G
	EIF3F
	EIF3D
	EIF3A

## Sheet: Motor, genes
All cortex genes	All subcortex genes		Cortex-subcortex overlap	Cortex-specific	Subcortex-specific
PPARGC1A	CPOX		ACHE	AACS	AAK1
SLC25A12	SLC11A2		ACO2	AATF	ABAT
SLC25A13	HMBS		ALAS1	ABCA7	ABLIM3
PINK1	FECH		BDH2	ABCB6	ACSL4
PHKA2	COX15		CACNB4	ABCB7	ACVR2A
PPP1CB	HMOX1		CNP	ABCC9	ADAM10
GSK3B	HMOX2		CNTN2	ABCD4	ADAM15
NDUFAF2	ALAS1		DLD	ABCG2	ADAM9
OXA1L	ALAD		DLST	ABHD10	ADAMTS1
MTFR1	TSPO		DST	ABHD12	ADCYAP1
ACO1	BDH2		EIF2B1	ABHD3	ADCYAP1R1
ACO2	IFITM3		EIF2B2	ABHD6	ADNP
IDH3A	IFITM1		FA2H	ACAA2	ADRA2A
SDHD	IFITM2		FH	ACADM	ADRA2C
FH	IFI35		GAL3ST1	ACE	ADRB1
SDHA	IFIT2		GLS	ACER3	AFF2
SDHB	IFNAR2		GSK3B	ACO1	AHI1
FASTKD1	HLA-H		HCN1	ACOT13	AKAP5
FASTKD2	HLA-B		HMBS	ACOT9	AKT2
FASTKD5	HLA-C		HMOX1	ACPP	ALAD
TBRG4	HLA-A		HMOX2	ACSL1	ALDH5A1
PPARD	HLA-F		IDH3B	ACSL6	AMIGO2
SLC25A3	HLA-G		IDH3G	ACSS2	AMIGO3
SLC25A4	HLA-E		IFI27	ADAL	ANP32E
COX17	IFI27		ITGA2	ADAMTS2	APBA1
MYC	IP6K2		ITGAV	ADCY3	ARC
MRAP2	BST2		ITGB1	ADCY4	ARF1
GNAS	ISG20		KCNQ5	ADCY9	ARF4
PPP1CC	XAF1		KLK6	ADM	ARL6
IL6ST	TYK2		MRAP2	ADPGK	ASIP
PHKB	IRF3		MTFR1	ADSSL1	ATAD1
PPP1R3B	OAS3		MTMR2	AFMID	ATP6V1D
PPP1R3D	IRF2		NDUFV1	AGA	ATP8A2
PCDH12	IRF7		OXA1L	AGXT	ATXN10
CALM2	IRF9		PDHB	AHCY	AUTS2
GAA	TRIM56		PLP1	AHCYL1	AVP
GYG1	SP100		PMPCB	AHCYL2	AXIN2
PPP1R3C	STAT2		QKI	AIFM1	B9D1
GBE1	MX2		SDHA	AK1	B9D2
GYS1	MX1		SDHB	AK2	BAIAP2
UGP2	PSMB8		SDHC	AKR1B1	BAIAP3
SMPDL3A	CHCHD5		SLC12A5	AKR1C1	BBS12
ABHD6	PMPCB		SLC18A2	AKR1C3	BBS4
GDE1	SDHC		STAR	AKR1C4	BBS7
ENPP2	SDHA		STRA6	ALAS2	BCAN
ENPP6	SDHB		SUCLA2	ALDH1A1	BCAR1
GPCPD1	OXA1L		SUCLG1	ALDH1A3	BCL9L
PGM1	UQCRC1		SYNJ1	ALDH3B1	BDNF
PFKM	SUCLG2		TH	ALDOC	BHLHB9
ADPGK	SUCLG1		TSPO	ALOXE3	BLOC1S1
PFKP	UQCRC2		UGT8	AMACR	BMPR1B
PGAM4	COX19		UQCR10	AMDHD1	BOK
BPGM	UQCRH		UQCRC1	AMN	BRAF
ENO2	BLOC1S1		UQCRC2	AMPD3	BSN
ENO3	NDUFV1			ANXA5	BST2
PGAM1	SURF1			APH1A	BTBD9
PGK1	IDH2			APIP	C1QL3
GAPDH	ACO2			APOA1	C2CD4C
ALDOC	DHTKD1			ARV1	CA7
OGDHL	IDH3B			ASPRV1	CACNA1B
NUDT5	CAT			ATF4	CACNA1E
ENTPD2	MTFR1			ATG4A	CACNA1H
ENTPD4	DLD			ATG4D	CACNB1
AK1	FH			ATIC	CACNB2
AK2	DLST			ATP1A1	CACNB3
MPP1	UQCR10			ATP1A3	CACNG3
AMPD3	PDHB			ATP1A4	CACNG4
NUDT9	IDH3G			ATP1B1	CACNG8
NUDT16	SUCLA2			ATP1B3	CADPS2
ITPA	AKT2			ATP2B2	CALB1
NUDT1	DICER1			ATP6AP2	CAMK1
RRM2B	MAL			ATP6V0B	CAMK1D
ENTPD3	MTMR2			ATP6V0D1	CAMK2A
NME1	ZNF24			ATP6V0E1	CAMK2B
DTYMK	NDRG1			ATP6V0E2	CAMK4
CMPK1	KLK6			ATP6V1A	CANX
PRPSAP1	UGT8			ATP6V1E2	CAPRIN2
CNP	QKI			ATP6V1F	CARM1
REXO2	SERINC5			ATP6V1G2	CASK
GLRX	GAL3ST1			B2M	CAT
KARS	PRX			BACE2	CBLN2
CMPK2	PLLP			BCAT1	CCDC103
PNKP	SIRT2			BCKDHA	CCDC66
ADM	CLDN11			BCL2L10	CCK
CACNB4	LAMA2			BCO2	CCKBR
ADCY9	SH3TC2			BID	CCNO
UCN2	JAM3			BLVRA	CD47
ADCY4	PMP22			BPGM	CD9
ADCY3	HDAC11			BRCA1	CDC42
GUCA2B	SOX8			C9orf3	CDH2
GMPR	SOX10			CALM2	CDK5
FHIT	CNP			CAPN1	CDK5R1
RAMP2	NKX6-1			CAPN2	CDK5R2
NPPB	NKX2-2			CARNS1	CDKL5
GUCY1A2	EIF2B4			CASP2	CDKN2C
PDE4A	EIF2B2			CASP7	CEACAM1
PDE11A	MED12			CBR1	CEBPB
ATP2B2	DUSP10			CBR4	CELF4
PRKAG2	EIF2B1			CCT8L2	CELSR3
ATP1B1	ZNF488			CD320	CENPK
ATP6V1A	BOK			CDA	CENPM
UCK2	OLIG1			CDKN1B	CENPO
TK2	CDKN2C			CDS1	CENPT
PDCL	GSN			CEND1	CENPV
CDA	PLP1			CERS2	CENPW
UPP1	NKX6-2			CH25H	CEP290
ENPP4	LPAR1			CHAT	CFL1
ADAL	FA2H			CHCHD10	CHAF1B
HDDC3	CNTN2			CHCHD4	CHCHD5
DNMT3A	OLIG2			CHD7	CHD5
ACPP	KCNJ10			CHKA	CHL1
RHOQ	CD9			CHST12	CHN1
LDHC	COL16A1			CHST15	CHRM2
HSPA1A	CTGF			CHST8	CHRM3
CTNS	ADAM10			CIAO1	CHRNA3
HSPA8	ADAM15			CIAPIN1	CHRNA7
CHCHD10	ADAM9			CLN3	CLDN11
OLA1	SEMA7A			CMPK1	CLSTN2
ADSSL1	FUT8			CMPK2	CNGB1
SDHAF2	PTK2			COASY	CNIH2
GMPS	DAB2			COL4A3BP	CNIH3
IMPDH1	ITGB1			COMMD3	CNR1
GMPR2	ITGAM			COMMD9	CNR2
FXN	ITGB5			COQ3	COL16A1
COX10	ITGB2			COQ5	COL25A1
NDUFA9	ILK			COQ6	COLQ
NDUFAB1	ITGAE			COX10	CORT
NDUFV1	ADAMTS1			COX11	COX15
NDUFB5	ITGAX			COX17	COX19
NDUFA10	ITGAV			COX4I2	CPE
NDUFB11	VAV3			COX5A	CPEB3
NDUFS8	DST			COX5B	CPLX2
NDUFS4	SYK			COX6A1	CPNE6
NDUFC1	ITGA2			COX6B1	CPOX
NDUFB9	ITGA1			COX6B2	CRB1
NDUFB6	FGR			COX6C	CRH
NDUFB4	HCK			COX7A1	CRIPT
NDUFA8	CEACAM1			COX7A2	CSPG5
NDUFA7	MYH9			COX7B	CTGF
NDUFA6	ITGA6			COX7C	CUL7
NDUFA12	ITGB1BP1			COX8A	CX3CL1
NDUFV3	CD47			COX8C	DAB2
NDUFV2	DOCK1			CPM	DAGLB
NDUFS7	PRAM1			CPT1A	DAPK1
NDUFS3	ZYX			CPXM2	DBN1
NDUFS2	BCAR1			CPZ	DCLK1
NDUFS1	MAPK8IP2			CRADD	DCX
SLC25A25	TH			CTH	DDC
PMPCB	NPAS1			CTNS	DEAF1
UQCRC2	GNAQ			CTRB1	DENND1A
SDHC	SERPINE2			CTRC	DGKA
CYC1	GRN			CTSZ	DGKB
CYCS	HEXB			CYB5R2	DGKH
COX8A	THRB			CYB5R4	DHTKD1
COX4I2	NCOA2			CYC1	DICER1
COX5B	AVP			CYCS	DLG3
COX6C	THRA			CYP11B1	DLG4
UQCRC1	UBE2Q1			CYP17A1	DLGAP1
UQCRB	KLK14			CYP1A2	DLGAP2
UQCR10	ACVR2A			CYP27A1	DNAAF2
UQCRQ	PACSIN1			CYP51A1	DNAH5
NDUFA4	DENND1A			DCXR	DNAH7
COX7B	STON2			DERA	DNAJC5
COX7C	CANX			DGAT1	DOC2A
COX5A	DDC			DHCR24	DOC2B
COX6A1	PPP3CA			DHCR7	DOCK1
UQCRFS1	CDKL5			DHFR	DPCD
UQCRHL	CUL7			DIABLO	DRD1
INPP5F	FBXO31			DLAT	DRD2
SYNJ2	RAB21			DLC1	DTNA
INPP5A	NUMBL			DNAJA3	DUSP10
INPP5J	AKAP5			DNMT3A	DYNC2H1
MTMR2	SDC2			DPAGT1	DYNC2LI1
SYNJ1	SARM1			DTYMK	DYNLL1
INPP5E	RAP2A			ECSIT	DYNLRB1
INPP5K	NEUROG3			EDNRA	DZIP1
ABHD10	NGEF			EGLN3	ECEL1
FUCA2	CFL1			ELOVL1	EEF2K
LCTL	CDK5R1			ELOVL2	EFNA5
GBA2	EPHA4			ELOVL4	EFNB3
TH	PAK3			ELOVL5	EGR3
NANS	LRP8			ELOVL6	EIF2AK4
SLC2A1	MARCKS			ELOVL7	EIF2B4
GANC	TIAM1			EMB	EMX1
GNPTG	CAPRIN2			ENO2	EMX2
IPPK	FSTL4			ENO3	EPHA4
MOGAT2	PALM			ENOPH1	EPHB1
MOGAT1	SDK1			ENPP2	EXOC3L1
RBKS	KIAA0319			ENPP4	FAM161A
GLB1	OPA1			ENPP6	FARP1
NEFL	CAMK1D			ENTPD2	FBXL20
NEFM	CARM1			ENTPD3	FBXO31
NEFH	HCRT			ENTPD4	FECH
DST	SYT11			F2R	FEZF2
KRT3	RIMS1			FABP5	FGF12
PRPH	STX1B			FADD	FGF13
TCHH	STX1A			FAM162A	FGF14
INA	RIMS3			FAM57B	FGR
LRP5	PFN2			FAM96A	FKBP1B
TFAM	GRIK5			FAM96B	FLOT2
AIFM1	STXBP1			FAR2	FLRT2
ECSIT	SYN1			FASTKD1	FLRT3
TIMMDC1	TOR1A			FASTKD2	FNBP1L
FOXRED1	PER2			FASTKD5	FOXA2
NDUFAF4	PTGER4			FDX1	FOXB1
NDUFAF3	SNCAIP			FGF7	FRMPD4
ITGB1	SLC30A1			FGF9	FSTL4
TAL1	LRRK2			FGFR2	FUT8
ITGA2	CHRNA3			FHIT	FYN
ITGA8	NLGN1			FLAD1	GABBR1
FOXF1	MEF2C			FLT1	GABRA2
FOXC2	PPP1R9A			FOLH1	GABRA3
INHBA	ACHE			FOLH1B	GABRA4
FGFR2	GABRA2			FOXC2	GABRA5
PERP	GCHFR			FOXF1	GABRB3
ITGAV	DAGLB			FOXRED1	GABRD
ITGA7	ALDH5A1			FTHL17	GABRG1
NFASC	COLQ			FUCA2	GABRG2
PARVA	NRXN3			FXN	GAD1
MADCAM1	SYNJ1			FZD4	GALR3
PDCD6	RIMS2			G6PC3	GAP43
HIF1A	SYT1			GAA	GCHFR
PRKCB	LIN7A			GANC	GLRA2
FZD4	APBA1			GAPDH	GLRA3
MYOF	NAAA			GART	GNAQ
FGF9	LIN7C			GAS6	GNB1
FLT1	LIN7B			GBA2	GPR176
VEGFC	BAIAP3			GBE1	GPR52
VEGFA	PTPRN2			GCLM	GRIA1
TMEM204	SYN2			GCSH	GRIA2
HTRA2	GAD1			GDE1	GRIA3
ABHD12	PPFIA2			GGPS1	GRID2
NPC1	CASK			GGT3P	GRIK2
GLRB	CACNA1B			GGT5	GRIK5
CEND1	SLC18A2			GGTA1P	GRIN2B
CNTN2	DNAJC5			GGTLC2	GRIN3A
CHD7	OTOF			GLB1	GRIP1
ZIC1	PCLO			GLDC	GRM2
LHB	CADPS2			GLO1	GRM5
BACE2	SYT10			GLRB	GRM7
ACE	DOC2B			GLRX	GRN
PCSK2	SYT7			GLS2	GSN
PCSK1	TRIM9			GLYCTK	HAND2
CTSZ	SYTL5			GMPR	HCK
PCSK6	RPH3A			GMPR2	HCRT
ATP6AP2	TC2N			GMPS	HCRTR1
CDKN1B	SYT16			GNAS	HDAC11
IFT172	SYT14			GNPTG	HES5
NCSTN	SYT17			GOT1	HEXB
SERPINH1	C2CD4C			GOT2	HIST1H3D
RHBDL3	DOC2A			GPCPD1	HIST1H3F
RHBDL2	SYT5			GPD1	HIST1H4B
TYSND1	SYT4			GRHPR	HIST1H4C
RET	SYT6			GSTO1	HIST1H4D
TESC	CDK5			GUCA2B	HIST1H4E
PAWR	VAMP2			GUCY1A2	HIST1H4H
GAS6	SNAP25			GYG1	HIST1H4I
AGA	PPFIA3			GYS1	HIST1H4J
BID	SNAP47			GZMB	HIST1H4K
EGLN3	CPLX2			H6PD	HIST1H4L
ASPRV1	UNC13A			HAGH	HIST4H4
TNF	RAB3GAP1			HCN2	HLA-A
PMPCA	CAMK2A			HCN4	HLA-B
F2R	RAB3A			HDDC3	HLA-C
MUL1	SNCA			HIF1A	HLA-E
S100A8	CNIH2			HLCS	HLA-F
BCL2L10	CNIH3			HMGCS2	HLA-G
PITRM1	CACNG8			HPN	HLA-H
CPM	CACNG3			HSD17B12	HMGCR
TRADD	CACNG4			HSD17B4	HOMER1
CPZ	MINK1			HSPA1A	HPRT1
ADAMTS2	CELF4			HSPA8	HRH1
NKX3-1	DAPK1			HSPD1	HTR1A
GZMB	NETO2			HSPE1	HTR1F
SORL1	CSPG5			HTRA2	HTR2A
DNAJA3	PPP1R9B			HVCN1	HTR2C
METAP2	CNR2			IDE	HTR4
IFI27	ADCYAP1			IDH1	HTR7
KLK6	UCN			IDH3A	HTT
ZMPSTE24	NPY2R			IDI1	IDH2
APH1A	GRM7			IFT172	IFI35
FADD	PRKACA			IFT57	IFIT2
CRADD	OPHN1			IL6ST	IFITM1
PCSK9	HTR2A			IMPA1	IFITM2
IDE	GRM2			IMPAD1	IFITM3
PARP1	CNR1			IMPDH1	IFNAR2
TMPRSS2	ABAT			INA	IFT122
SPCS2	PRKCE			INHBA	IFT140
SPCS1	NTSR1			INPP5A	IFT20
DLC1	TAC1			INPP5E	IFT52
SPPL2B	KISS1R			INPP5F	IFT74
PLAT	CA7			INPP5J	IFT81
CHCHD4	RETN			INPP5K	IGSF9
FAM162A	LGI1			INSIG1	ILDR2
CAPN2	FLRT3			INSIG2	ILK
CAPN1	CBLN2			IP6K3	IP6K2
DIABLO	SLITRK6			IPPK	IQUB
PMAIP1	SLITRK5			ISCA1	IRF2
CPXM2	EPHB1			ISCA2	IRF3
CASP7	EFNA5			ISCU	IRF7
CASP2	SLITRK2			ITGA7	IRF9
IFT57	AMIGO2			ITGA8	ISG20
ATG4A	FLRT2			ITM2A	ISL1
ATG4D	LRRC24			ITM2B	ITGA1
HSPD1	LRRC4B			ITPA	ITGA3
CLN3	BDNF			JAK3	ITGA5
HSPE1	SLITRK4			KARS	ITGA6
ABCA7	SLITRK3			KCNA1	ITGAE
JAK3	LINGO2			KCNA2	ITGAM
TMEM59	NTRK3			KCNA3	ITGAX
TINF2	LRRN3			KCNAB1	ITGB1BP1
ITM2A	AMIGO3			KCNAB2	ITGB2
ITM2B	UBE2V2			KCNAB3	ITGB5
AATF	LRRTM3			KCNC1	ITPKA
PTX3	OXT			KCNC2	JAM3
ANXA5	CLSTN2			KCNC3	JPH3
HPN	ADNP			KCNC4	JPH4
KLF9	LRRTM1			KCNH6	KCNB1
LMO2	LRRTM2			KCNH8	KCND2
KEAP1	NLGN2			KCNJ11	KCNIP2
AMDHD1	NRXN1			KCNJ14	KCNJ10
MRPS36	IGSF9			KCNJ3	KIAA0319
GCLM	KLK8			KCNJ8	KISS1R
FDX1	FRMPD4			KCNK15	KLHL1
SRD5A1	CDH2			KCNK5	KLK14
CYP17A1	C1QL3			KCNK7	KLK8
MMACHC	CDC42			KCNS1	KRAS
TCN2	CRIPT			KCNS3	LAMA2
AMN	CAMK1			KDM3A	LGI1
CD320	NEDD4			KEAP1	LHX2
CTRB1	BHLHB9			KLF9	LHX8
CTRC	EEF2K			KMO	LIN7A
ABCD4	PDLIM5			KRT3	LIN7B
ISCA2	PTEN			KYNU	LIN7C
ISCA1	RELN			LBR	LINGO2
ISCU	SHANK3			LCTL	LPAR1
NUBP1	SHANK1			LDHB	LRFN4
CIAO1	GSK3B			LDHC	LRFN5
MMS19	DLG4			LDLRAP1	LRP1
CIAPIN1	NETO1			LHB	LRP11
NUBP2	PTK2B			LIAS	LRP8
FAM96B	RAPSN			LIPC	LRRC24
FAM96A	MAPK1			LMO2	LRRC4B
HMBS	ARF1			LPIN3	LRRC6
NFE2L1	KCNB1			LRP5	LRRK2
ALAS1	NFATC4			LSS	LRRN3
SLC25A39	LZTS1			MADCAM1	LRRTM1
TMEM14C	YWHAH			MAT2A	LRRTM2
ABCB6	SIPA1L1			MAT2B	LRRTM3
ALAS2	ITPKA			MCCC1	LSAMP
BDH2	BAIAP2			MCEE	LTBP4
TSPO	CAMK2B			MDH1	LZTS1
HMOX1	DBN1			MDH2	MAFG
HMOX2	BCAN			METAP2	MAL
BLVRA	NCDN			MFSD3	MAP2
AKR1C1	SHISA9			MGLL	MAP6
AKR1C3	SHISA7			MGST2	MAPK1
HLCS	VGF			MLYCD	MAPK8IP2
CYP1A2	FGF14			MMACHC	MARCKS
PCCA	YWHAG			MMS19	MBD5
MCCC1	NCAM1			MOCS1	MBP
VKORC1	BRAF			MOGAT1	MDK
CBR1	NTRK2			MOGAT2	MED12
CBR4	PLK2			MPDU1	MEF2C
AKR1C4	CPEB3			MPP1	MINK1
SUCLA2	NR2E1			MRI1	MIS18BP1
IDH3B	NEUROD2			MRPS36	MX1
SUCLG1	NOS1			MTHFD1	MX2
IDH3G	CRH			MTHFD2	MYH9
MDH1	DRD2			MUL1	NAAA
GPD1	DRD1			MVK	NBN
DLD	GRIK2			MYC	NCAM1
DLST	GRM5			MYO5A	NCDN
DLAT	STAR			MYOF	NCOA2
PDHA1	PTPN5			NAALAD2	NDRG1
PGD	GRIA1			NAGS	NEDD4
TKT	CALB1			NANS	NEGR1
TALDO1	ARC			NCSTN	NETO1
LDHB	SLC8A2			NDUFA10	NETO2
NUDT12	NPTN			NDUFA12	NEUROD2
KCNAB2	PTN			NDUFA4	NEUROG3
CYB5R4	SHANK2			NDUFA6	NFATC4
DCXR	RGS14			NDUFA7	NGEF
TPI1	SORCS3			NDUFA8	NKX2-2
ATIC	EIF2AK4			NDUFA9	NKX6-1
GART	JPH4			NDUFAB1	NKX6-2
MTHFD1	SRF			NDUFAF2	NLGN1
KMO	RIN1			NDUFAF3	NLGN2
APIP	PPP3CB			NDUFAF4	NLGN4X
AHCYL2	HRH1			NDUFB11	NLGN4Y
AHCYL1	JPH3			NDUFB4	NME5
MLYCD	SYNGAP1			NDUFB5	NOS1
AHCY	KRAS			NDUFB6	NPAS1
NUDT7	TRH			NDUFB9	NPFFR2
MOCS1	P2RY1			NDUFC1	NPHP1
NFS1	ADRA2C			NDUFS1	NPTN
COASY	ADRA2A			NDUFS2	NPTX1
PPCDC	GABBR1			NDUFS3	NPTX2
MAT2B	PRLHR			NDUFS4	NPY
MAT2A	NPY1R			NDUFS7	NPY1R
FAR2	ECEL1			NDUFS8	NPY2R
MCEE	CPE			NDUFV2	NPY5R
DGAT1	SORCS1			NDUFV3	NR2E1
PRDX5	PCSK1N			NEFH	NR4A2
FLAD1	TAC3			NEFL	NR4A3
DERA	PDYN			NEFM	NRCAM
H6PD	NPFFR2			NEO1	NRP1
OGDH	SSTR1			NFASC	NRXN1
IDH1	SSTR2			NFE2L1	NRXN3
PDHX	NPY5R			NFS1	NTRK2
PNPO	NPY			NKX3-1	NTRK3
LIAS	OPRM1			NME1	NTSR1
PDXK	HCRTR1			NPC1	NUMBL
MDH2	OPRL1			NPC1L1	OAS3
SHMT2	BBS12			NPC2	OCRL
MRI1	GLS			NPPB	OLFM3
OXSM	ATP8A2			NSF	OLIG1
PEMT	HAND2			NUBP1	OLIG2
HSD17B4	MRAP2			NUBP2	OPA1
FOLH1	CCKBR			NUDT1	OPHN1
MVK	NEGR1			NUDT12	OPRK1
PPT1	STRA6			NUDT16	OPRL1
ACOT9	ASIP			NUDT5	OPRM1
AFMID	UCHL1			NUDT7	OTOF
PPT2	OPRK1			NUDT9	OXT
SPR	RIMS4			OAT	P2RY1
ACSL1	BTBD9			OGDH	PACSIN1
ACSL6	SNAP91			OGDHL	PAK3
ACOT13	AAK1			OLA1	PAK4
QDPR	PIK3CB			OXSM	PALM
MTHFD2	UBQLN2			PARK7	PARD3
DHFR	SMAP1			PARP1	PAX6
KYNU	WASL			PARVA	PCDH8
ELOVL1	SCYL2			PAWR	PCDHB11
ELOVL5	PLCB1			PC	PCDHB14
ELOVL2	CDK5R2			PCCA	PCDHB5
ELOVL6	PLB1			PCDH12	PCLO
ELOVL7	CACNA1H			PCSK1	PCSK1N
ACSS2	POMZP3			PCSK2	PDE1B
HSD17B12	ARF4			PCSK6	PDE7B
TECR	FYN			PCSK9	PDLIM5
COQ6	HPRT1			PCYT1B	PDSS1
COQ5	KLHL1			PDCD6	PDYN
COQ3	CHL1			PDCL	PENK
UBIAD1	SLC4A10			PDE11A	PER2
PDSS2	ITGA3			PDE4A	PFN2
GRHPR	LSAMP			PDHA1	PGAP1
AGXT	PRKAR1B			PDHX	PIBF1
GLDC	MBD5			PDSS2	PIK3CB
GCSH	RNF180			PDXK	PJA2
PDHB	MAFG			PECR	PLB1
BCKDHA	LHX8			PEMT	PLCB1
ALDH3B1	ITGA5			PERP	PLK2
RDH11	CEBPB			PFKM	PLLP
GLYCTK	SPTBN4			PFKP	PLXNA1
GLO1	SPTBN2			PGAM1	PLXNA2
BCO2	PUM1			PGAM4	PLXNA3
RELA	CAMK4			PGD	PLXNA4
ALDH1A1	FOXA2			PGK1	PLXNC1
HAGH	EFNB3			PGM1	PMP22
PNKD	NPHP1			PGP	POMZP3
CHST8	AUTS2			PHKA2	PPFIA2
MPDU1	NR4A3			PHKB	PPFIA3
ST6GALNAC1	DYNLRB1			PHOSPHO1	PPP1R9A
ATF4	AFF2			PINK1	PPP1R9B
GSTO1	PJA2			PITRM1	PPP3CA
SLC25A11	ATAD1			PLAT	PPP3CB
PC	NLGN4Y			PLEKHA8	PRAM1
GOT1	NLGN4X			PLOD1	PRKACA
IMPA1	PDE1B			PMAIP1	PRKAR1B
PGP	PRKAR2B			PMPCA	PRKAR2B
IMPAD1	HTT			PNKD	PRKCE
AKR1B1	FOXB1			PNKP	PRKCG
FA2H	FGF13			PNPO	PRKCI
UGT8	HMGCR			PPARD	PRKG1
ST3GAL5	PRKCG			PPARGC1A	PRLHR
ST3GAL6	ADCYAP1R1			PPCDC	PRX
ST3GAL1	LRP11			PPP1CB	PSMB8
ST3GAL2	SCN9A			PPP1CC	PTEN
GAL3ST1	NR4A2			PPP1R3B	PTGER4
CERS2	THBS1			PPP1R3C	PTK2
ST8SIA5	PENK			PPP1R3D	PTK2B
ST8SIA1	HTR1A			PPT1	PTN
FAM57B	MDK			PPT2	PTPN5
SPTSSB	FBXL20			PRDX5	PTPRF
OAT	ADRB1			PRKAB1	PTPRN
GLS2	GABRA5			PRKAB2	PTPRN2
NAGS	VDAC1			PRKAG2	PUM1
GLS	DEAF1			PRKCB	PYGO1
LIPC	HTR2C			PRPH	PYGO2
PRKAB1	CCK			PRPSAP1	RAB11FIP2
RBP1	DLGAP2			PTGDS	RAB21
CHST12	GLRA2			PTX3	RAB23
CHST15	GLRA3			PYCR2	RAB3A
AACS	SLC17A7			QDPR	RAB3GAP1
GGTLC2	CACNB4			RAMP2	RAP2A
ENOPH1	SHC3			RBKS	RAPGEF4
ELOVL4	GABRG2			RBP1	RAPSN
RGN	TMOD2			RDH11	RBBP5
MGLL	GRID2			RELA	RBFOX2
CARNS1	SLC1A4			RET	RELN
PLP1	GPR52			REXO2	RERE
GGT3P	NPTX2			RGN	RETN
PECR	SLC12A5			RHBDL2	RFX3
PLOD1	SEZ6			RHBDL3	RGS14
EIF2B2	GALR3			RHOQ	RIC3
GOT2	HOMER1			RRM2B	RIMS1
QKI	GRIN2B			S100A8	RIMS2
G6PC3	KCND2			SAMD8	RIMS3
EIF2B1	CHRNA7			SCARA5	RIMS4
BCAT1	FGF12			SCN1A	RIN1
ALOXE3	GABRB3			SCN1B	RIT2
TMLHE	NPTX1			SCN2B	RNF165
CTH	HTR4			SCN4B	RNF180
PTGDS	GPR176			SCN8A	ROPN1L
CYP27A1	HTR7			SDHAF2	RPGRIP1L
MGST2	UNC13C			SDHD	RPH3A
NAALAD2	GABRG1			SEC14L1	RSF1
MYO5A	PCDHB5			SERPINH1	RSPH1
PYCR2	DLGAP1			SFXN1	RSPH9
BRCA1	RIC3			SFXN4	RUVBL1
ACADM	GABRA4			SGK2	SARM1
C9orf3	GABRA3			SGMS1	SCN9A
FOLH1B	CHRM2			SHMT2	SCYL2
GGT5	CHRM3			SLC12A2	SDC2
AMACR	CACNB1			SLC13A3	SDK1
GGTA1P	CACNB2			SLC16A1	SEMA3A
PARK7	CACNB3			SLC16A3	SEMA4F
CYP11B1	GRIA2			SLC16A6	SEMA7A
ALDH1A3	MBP			SLC16A7	SERINC5
KDM3A	GRIA3			SLC17A4	SERPINE2
STAR	HTR1F			SLC19A2	SEZ6
ARV1	LRFN5			SLC19A3	SH3TC2
SLC44A1	LRFN4			SLC1A5	SHANK1
APOA1	KCNIP2			SLC1A7	SHANK2
DHCR24	PCDH8			SLC20A2	SHANK3
SPHK2	SST			SLC22A5	SHC3
SPHK1	VIPR1			SLC24A2	SHISA7
SAMD8	CPNE6			SLC25A11	SHISA9
SGMS1	BSN			SLC25A12	SIPA1L1
IP6K3	KCNQ5			SLC25A13	SIRT2
CH25H	EGR3			SLC25A15	SIX3
CYB5R2	DTNA			SLC25A17	SLC11A2
CHKA	CX3CL1			SLC25A25	SLC17A7
SQLE	PTPRF			SLC25A3	SLC1A1
ACHE	GABRD			SLC25A32	SLC1A4
FABP5	PCDHB14			SLC25A37	SLC1A6
SLC27A1	PCDHB11			SLC25A39	SLC30A1
FGF7	RIT2			SLC25A4	SLC4A10
INSIG2	SLC1A1			SLC27A1	SLC8A2
ABHD3	SLC1A6			SLC2A1	SLC9A6
INSIG1	CACNA1E			SLC2A6	SLIT1
DHCR7	DLG3			SLC31A1	SLIT2
HMGCS2	GNB1			SLC32A1	SLITRK2
LBR	FLOT2			SLC34A3	SLITRK3
GGPS1	SSTR3			SLC35A4	SLITRK4
CYP51A1	CORT			SLC36A1	SLITRK5
CDS1	USP14			SLC38A1	SLITRK6
ACER3	PDE7B			SLC38A10	SMAP1
PCYT1B	SMPD3			SLC38A2	SMPD3
DPAGT1	RAPGEF4			SLC38A5	SNAP25
ACAA2	SNX19			SLC3A2	SNAP47
PHOSPHO1	EXOC3L1			SLC44A1	SNAP91
IDI1	ILDR2			SLC46A1	SNCA
CHAT	RAB11FIP2			SLC47A1	SNCAIP
NPC1L1	PTPRN			SLC48A1	SNX19
LSS	FKBP1B			SLC4A8	SORCS1
LPIN3	LTBP4			SLC4A9	SORCS3
SLC31A1	VIP			SLC5A10	SOX10
TMEM30A	ISL1			SLC5A11	SOX8
SLC19A2	SULF1			SLC5A2	SP100
SLC19A3	COL25A1			SLC5A6	SPA17
STRA6	RNF165			SLC6A19	SPEF2
SLC5A6	SEMA3A			SLC6A8	SPTBN2
SLC25A32	NRP1			SLC7A1	SPTBN4
SLC46A1	SEMA4F			SLC7A10	SRF
ABCB7	NRCAM			SLC7A14	SST
SLC48A1	BMPR1B			SLC7A5	SSTR1
SLC25A17	SLIT1			SLC7A5P2	SSTR2
ABCG2	CHN1			SLC7A6	SSTR3
TFRC	PLXNC1			SLC7A8	SSX2IP
SFXN4	PLXNA2			SLC8A1	STAT2
SFXN1	PLXNA1			SLC9A1	STK36
NEO1	PLXNA4			SLC9A5	STON2
SLC25A37	PLXNA3			SLC9A9	STX1A
B2M	SLIT2			SMPDL3A	STX1B
TF	PARD3			SOD1	STXBP1
SCARA5	DGKB			SORL1	SUCLG2
STEAP2	DGKA			SPCS1	SULF1
FTHL17	DGKH			SPCS2	SURF1
SOD1	LRP1			SPHK1	SYK
SGK2	GAP43			SPHK2	SYN1
SLC8A1	NBN			SPPL2B	SYN2
ATP1B3	TERF2IP			SPR	SYNGAP1
SLC9A1	TERT			SPTSSB	SYT1
ATP1A4	PYGO1			SQLE	SYT10
ATP1A3	PYGO2			SRD5A1	SYT11
ATP1A1	RBBP5			ST3GAL1	SYT14
SLC36A1	BCL9L			ST3GAL2	SYT16
SLC35A4	AXIN2			ST3GAL5	SYT17
SLC47A1	ANP32E			ST3GAL6	SYT4
SLC9A5	CHD5			ST6GALNAC1	SYT5
SLC9A9	CENPV			ST8SIA1	SYT6
TMCO3	RUVBL1			ST8SIA5	SYT7
COX7A2	CENPT			STEAP2	SYTL5
COX11	CENPW			STOML2	TAC1
ATP6V1E2	CENPK			SYNJ2	TAC3
ATP6V0E1	CENPM			TAF7	TC2N
ATP6V0D1	CENPO			TAL1	TCTN1
ATP6V0B	RSF1			TALDO1	TCTN2
ATP6V0E2	MIS18BP1			TBRG4	TERF2IP
ATP6V1F	HIST1H4L			TCHH	TERT
COX8C	HIST1H4K			TCN2	THBS1
COX6B1	HIST1H4B			TECR	THRA
HVCN1	HIST1H4H			TESC	THRB
ATP6V1G2	HIST1H4I			TF	THY1
COX6B2	HIST1H4J			TFAM	TIAM1
COX7A1	HIST1H4C			TFRC	TMEM106B
SLC2A6	HIST1H4D			TIMMDC1	TMEM107
MFSD3	HIST1H4E			TINF2	TMEM17
STOML2	HIST4H4			TK2	TMEM67
EMB	CHAF1B			TKT	TMOD2
SLC16A6	HIST1H3F			TMCO3	TOPORS
SLC16A7	HIST1H3D			TMEM14C	TOR1A
SLC16A1	PDSS1			TMEM175	TRH
SLC16A3	HES5			TMEM204	TRIM56
SLC7A5	ROPN1L			TMEM30A	TRIM9
SLC7A6	STK36			TMEM59	TTC21B
SLC7A8	DPCD			TMLHE	TTC30A
SLC7A1	SPA17			TMPRSS2	TTC30B
SLC7A5P2	DNAAF2			TNF	TTC8
SLC38A5	DNAH5			TPI1	TYK2
SLC25A15	TCTN1			TRADD	UBE2B
SLC6A19	IQUB			TRPM2	UBE2Q1
SLC7A14	IFT52			TRPM4	UBE2V2
SLC7A10	BBS4			TYSND1	UBQLN2
SLC32A1	IFT20			UBIAD1	UCHL1
SLC1A5	IFT140			UCK2	UCN
SLC1A7	AHI1			UCN2	UNC13A
PRKAB2	FNBP1L			UGP2	UNC13C
CPT1A	DYNC2LI1			UPP1	UQCRH
LDLRAP1	DZIP1			UQCRB	USP14
NPC2	TCTN2			UQCRFS1	VAMP2
PLEKHA8	TMEM67			UQCRHL	VAV3
COL4A3BP	ARL6			UQCRQ	VDAC1
KCNJ3	TMEM17			VEGFA	VGF
KCNJ8	ABLIM3			VEGFC	VIP
KCNJ11	RAB23			VKORC1	VIPR1
KCNJ14	ATXN10			ZIC1	WASL
ABCC9	CCNO			ZMPSTE24	WDR19
KCNC1	BBS7				WDR35
KCNC2	TTC8				WNT2B
KCNC3	B9D1				WNT7B
KCNC4	B9D2				XAF1
SLC18A2	CELSR3				YWHAG
TMEM175	OCRL				YWHAH
KCNA1	RPGRIP1L				ZMYND10
KCNA2	FAM161A				ZNF24
KCNA3	PIBF1				ZNF488
SLC17A4	ATP6V1D				ZYX
CCT8L2	TMEM107
KCNH6	IFT81
KCNH8	DYNLL1
KCNK5	WDR35
KCNK7	WDR19
KCNAB1	TTC30B
KCNAB3	TTC30A
SLC12A5	SSX2IP
EDNRA	DYNC2H1
SLC34A3	IFT122
KCNK15	IFT74
KCNQ5	RFX3
SEC14L1	NME5
SCN2B	LRRC6
KCNS1	CCDC103
KCNS3	DNAH7
NSF	RSPH9
TAF7	SPEF2
SLC6A8	UBE2B
SLC38A1	ZMYND10
SLC38A10	RSPH1
SLC38A2	PAX6
SLC13A3	PGAP1
SLC22A5	WNT7B
SCN1A	TTC21B
SLC5A2	LHX2
SLC24A2	EMX1
SLC5A11	EMX2
SLC5A10	WNT2B
SLC12A2	SIX3
SCN1B	FEZF2
TRPM2	RBFOX2
COMMD9	GRIN3A
TRPM4	TMEM106B
COMMD3	FARP1
SLC20A2	SLC9A6
SCN8A	PRKG1
SCN4B	ACSL4
HCN4	MAP2
SLC3A2	MAP6
SLC4A8	DCLK1
SLC4A9	PAK4
HCN2	GRIP1
HCN1	RERE
	DCX
	CNGB1
	TOPORS
	PRKCI
	THY1
	CRB1
	OLFM3
	CEP290
	CCDC66
	HCN1

## Sheet: Memory, processes
Cortex-specific	Subcortex-specific	Overlap
GO_ESTABLISHMENT_OF_PROTEIN_LOCALIZATION_TO_ENDOPLASMIC_RETICULUM_signal	GO_MYOTUBE_DIFFERENTIATION_signal	GO_ESTABLISHMENT_OF_PROTEIN_LOCALIZATION_TO_ENDOPLASMIC_RETICULUM_signal
GO_MEMBRANE_BUDDING_signal	GO_FEAR_RESPONSE_signal	GO_CENTRAL_NERVOUS_SYSTEM_NEURON_DEVELOPMENT_signal
GO_NEGATIVE_REGULATION_OF_CALCIUM_ION_IMPORT_signal	GO_EPHRIN_RECEPTOR_SIGNALING_PATHWAY_signal	GO_REGULATION_OF_CHROMATIN_SILENCING_signal
GO_NEGATIVE_REGULATION_OF_TRANSMEMBRANE_TRANSPORT_signal	GO_DENDRITE_DEVELOPMENT_signal
GO_PROTEIN_REFOLDING_signal	GO_DENDRITE_MORPHOGENESIS_signal
GO_HOMOTYPIC_CELL_CELL_ADHESION_signal	GO_CENTRAL_NERVOUS_SYSTEM_NEURON_AXONOGENESIS_signal
GO_PROTEIN_LOCALIZATION_TO_SYNAPSE_signal	GO_CENTRAL_NERVOUS_SYSTEM_PROJECTION_NEURON_AXONOGENESIS_signal
GO_CENTRAL_NERVOUS_SYSTEM_NEURON_DEVELOPMENT_signal	GO_CENTRAL_NERVOUS_SYSTEM_NEURON_DEVELOPMENT_signal
GO_INNERVATION_signal	GO_MOTOR_NEURON_AXON_GUIDANCE_signal
GO_REGULATION_OF_CATENIN_IMPORT_INTO_NUCLEUS_signal	GO_NEURON_PROJECTION_GUIDANCE_signal
GO_NEGATIVE_REGULATION_OF_WOUND_HEALING_signal	GO_NEURON_PROJECTION_DEVELOPMENT_signal
GO_POSITIVE_REGULATION_OF_ACTIN_FILAMENT_BUNDLE_ASSEMBLY_signal	GO_NEURON_PROJECTION_MORPHOGENESIS_signal
GO_REGULATION_OF_ACTIN_FILAMENT_BUNDLE_ASSEMBLY_signal	GO_CELL_MORPHOGENESIS_INVOLVED_IN_NEURON_DIFFERENTIATION_signal
GO_SPROUTING_ANGIOGENESIS_signal	GO_IONOTROPIC_GLUTAMATE_RECEPTOR_SIGNALING_PATHWAY_signal
GO_NEGATIVE_REGULATION_OF_EPITHELIAL_CELL_MIGRATION_signal	GO_GLUTAMATE_RECEPTOR_SIGNALING_PATHWAY_signal
GO_POSITIVE_REGULATION_OF_RESPONSE_TO_BIOTIC_STIMULUS_signal	GO_VESICLE_DOCKING_INVOLVED_IN_EXOCYTOSIS_signal
GO_POSITIVE_REGULATION_OF_CHEMOKINE_PRODUCTION_signal	GO_NEURON_NEURON_SYNAPTIC_TRANSMISSION_signal
GO_LYMPHOCYTE_COSTIMULATION_signal	GO_SYNAPTIC_TRANSMISSION_GLUTAMATERGIC_signal
GO_INTERFERON_GAMMA_MEDIATED_SIGNALING_PATHWAY_signal	GO_REGULATION_OF_ALPHA_AMINO_3_HYDROXY_5_METHYL_4_ISOXAZOLE_PROPIONATE_SELECTIVE_GLUTAMATE_RECEPTOR_ACTIVITY_signal
GO_RESPONSE_TO_INTERFERON_GAMMA_signal	GO_POSITIVE_REGULATION_OF_EXCITATORY_POSTSYNAPTIC_POTENTIAL_signal
GO_CELLULAR_RESPONSE_TO_INTERFERON_GAMMA_signal	GO_POSITIVE_REGULATION_OF_SYNAPTIC_TRANSMISSION_signal
GO_ACTIVATION_OF_IMMUNE_RESPONSE_signal	GO_REGULATION_OF_LONG_TERM_NEURONAL_SYNAPTIC_PLASTICITY_signal
GO_IMMUNE_RESPONSE_REGULATING_CELL_SURFACE_RECEPTOR_SIGNALING_PATHWAY_signal	GO_REGULATION_OF_NEURONAL_SYNAPTIC_PLASTICITY_signal
GO_FC_RECEPTOR_SIGNALING_PATHWAY_signal	GO_MODULATION_OF_SYNAPTIC_TRANSMISSION_signal
GO_PHAGOCYTOSIS_signal	GO_REGULATION_OF_SYNAPSE_STRUCTURE_OR_ACTIVITY_signal
GO_FC_GAMMA_RECEPTOR_SIGNALING_PATHWAY_signal	GO_REGULATION_OF_SYNAPTIC_PLASTICITY_signal
GO_INFLAMMATORY_RESPONSE_TO_ANTIGENIC_STIMULUS_signal	GO_SYNAPTIC_SIGNALING_signal
GO_DETECTION_OF_BIOTIC_STIMULUS_signal	GO_ORGANELLE_MEMBRANE_FUSION_signal
GO_DETECTION_OF_CHEMICAL_STIMULUS_INVOLVED_IN_SENSORY_PERCEPTION_OF_TASTE_signal	GO_ORGANELLE_FUSION_signal
GO_NEGATIVE_REGULATION_OF_HISTONE_METHYLATION_signal	GO_POSITIVE_REGULATION_OF_REGULATED_SECRETORY_PATHWAY_signal
GO_REGULATION_OF_GENE_SILENCING_signal	GO_POSITIVE_REGULATION_OF_CALCIUM_ION_DEPENDENT_EXOCYTOSIS_signal
GO_REGULATION_OF_CHROMATIN_SILENCING_signal	GO_REGULATION_OF_REGULATED_SECRETORY_PATHWAY_signal
GO_REGULATION_OF_GENE_EXPRESSION_EPIGENETIC_signal	GO_REGULATION_OF_CALCIUM_ION_DEPENDENT_EXOCYTOSIS_signal
GO_NEGATIVE_REGULATION_OF_MYELOID_CELL_DIFFERENTIATION_signal	GO_CLATHRIN_MEDIATED_ENDOCYTOSIS_signal
GO_TELOMERE_ORGANIZATION_signal	GO_SYNAPTIC_VESICLE_ENDOCYTOSIS_signal
GO_NON_RECOMBINATIONAL_REPAIR_signal	GO_SYNAPTIC_VESICLE_RECYCLING_signal
GO_BETA_CATENIN_TCF_COMPLEX_ASSEMBLY_signal	GO_ORGANELLE_LOCALIZATION_signal
GO_TELOMERE_CAPPING_signal	GO_VESICLE_LOCALIZATION_signal
GO_DNA_REPLICATION_INDEPENDENT_NUCLEOSOME_ORGANIZATION_signal	GO_CYTOSOLIC_TRANSPORT_signal
GO_HISTONE_EXCHANGE_signal	GO_REGULATION_OF_NEUROTRANSMITTER_LEVELS_signal
GO_CENTROMERE_COMPLEX_ASSEMBLY_signal	GO_SIGNAL_RELEASE_signal
GO_NEGATIVE_REGULATION_OF_MEGAKARYOCYTE_DIFFERENTIATION_signal	GO_PRESYNAPTIC_PROCESS_INVOLVED_IN_SYNAPTIC_TRANSMISSION_signal
GO_NEGATIVE_REGULATION_OF_HEMATOPOIETIC_PROGENITOR_CELL_DIFFERENTIATION_signal	GO_CALCIUM_ION_REGULATED_EXOCYTOSIS_signal
GO_REGULATION_OF_MEGAKARYOCYTE_DIFFERENTIATION_signal	GO_SYNAPTIC_VESICLE_LOCALIZATION_signal
GO_REGULATION_OF_HEMATOPOIETIC_PROGENITOR_CELL_DIFFERENTIATION_signal	GO_SYNAPTIC_VESICLE_CYCLE_signal
GO_CHROMATIN_ASSEMBLY_OR_DISASSEMBLY_signal	GO_REGULATION_OF_NEUROTRANSMITTER_TRANSPORT_signal
GO_DNA_PACKAGING_signal	GO_REGULATION_OF_NEUROTRANSMITTER_SECRETION_signal
GO_POSITIVE_REGULATION_OF_GENE_EXPRESSION_EPIGENETIC_signal	GO_REGULATION_OF_SYNAPTIC_VESICLE_EXOCYTOSIS_signal
GO_NEGATIVE_REGULATION_OF_GENE_EXPRESSION_EPIGENETIC_signal	GO_REGULATION_OF_SYNAPTIC_VESICLE_TRANSPORT_signal
GO_CHROMATIN_SILENCING_signal	GO_REGULATION_OF_CLATHRIN_MEDIATED_ENDOCYTOSIS_signal
GO_DNA_REPLICATION_DEPENDENT_NUCLEOSOME_ORGANIZATION_signal	GO_ORGANIC_CYCLIC_COMPOUND_CATABOLIC_PROCESS_signal
GO_CHROMATIN_SILENCING_AT_RDNA_signal	GO_TRANSLATIONAL_INITIATION_signal
GO_PROTEIN_HETEROTETRAMERIZATION_signal	GO_RNA_CATABOLIC_PROCESS_signal
GO_PROTEIN_HETEROOLIGOMERIZATION_signal	GO_MULTI_ORGANISM_METABOLIC_PROCESS_signal
GO_DOUBLE_STRAND_BREAK_REPAIR_signal	GO_NUCLEAR_TRANSCRIBED_MRNA_CATABOLIC_PROCESS_NONSENSE_MEDIATED_DECAY_signal
GO_ENTRAINMENT_OF_CIRCADIAN_CLOCK_BY_PHOTOPERIOD_signal	GO_ESTABLISHMENT_OF_PROTEIN_LOCALIZATION_TO_ENDOPLASMIC_RETICULUM_signal
GO_PHOTOPERIODISM_signal	GO_PROTEIN_LOCALIZATION_TO_ENDOPLASMIC_RETICULUM_signal
	GO_PROTEIN_TARGETING_TO_MEMBRANE_signal
	GO_POSITIVE_REGULATION_OF_STEROID_METABOLIC_PROCESS_signal
	GO_REGULATION_OF_CHROMATIN_SILENCING_signal
	GO_GLIAL_CELL_DEVELOPMENT_signal
	GO_GLIAL_CELL_DIFFERENTIATION_signal
	GO_OLIGODENDROCYTE_DIFFERENTIATION_signal
	GO_ENSHEATHMENT_OF_NEURONS_signal

## Sheet: Motor, processes
Cortex-specific	Subcortex-specific	Overlap
GO_INTERMEDIATE_FILAMENT_ORGANIZATION_signal	GO_RESPONSE_TO_TYPE_I_INTERFERON_signal	GO_AEROBIC_RESPIRATION_signal
GO_INTERMEDIATE_FILAMENT_BASED_PROCESS_signal	GO_AEROBIC_RESPIRATION_signal	GO_HEME_METABOLIC_PROCESS_signal
GO_HETEROTYPIC_CELL_CELL_ADHESION_signal	GO_HEME_METABOLIC_PROCESS_signal
GO_MESODERMAL_CELL_DIFFERENTIATION_signal	GO_ENSHEATHMENT_OF_NEURONS_signal
GO_REGULATION_OF_VASCULAR_ENDOTHELIAL_GROWTH_FACTOR_RECEPTOR_SIGNALING_PATHWAY_signal	GO_OLIGODENDROCYTE_DIFFERENTIATION_signal
GO_NEGATIVE_REGULATION_OF_GLYCOPROTEIN_METABOLIC_PROCESS_signal	GO_INTEGRIN_MEDIATED_SIGNALING_PATHWAY_signal
GO_PROTEIN_MATURATION_signal	GO_PHOTORECEPTOR_CELL_DEVELOPMENT_signal
GO_PEPTIDE_HORMONE_PROCESSING_signal	GO_EPITHELIAL_CILIUM_MOVEMENT_signal
GO_WALKING_BEHAVIOR_signal	GO_CILIUM_MOVEMENT_signal
GO_PHOSPHOLIPID_CATABOLIC_PROCESS_signal	GO_AXONEME_ASSEMBLY_signal
GO_SPHINGOLIPID_BIOSYNTHETIC_PROCESS_signal	GO_CILIUM_ORGANIZATION_signal
GO_C21_STEROID_HORMONE_METABOLIC_PROCESS_signal	GO_CILIUM_MORPHOGENESIS_signal
GO_INTRACELLULAR_LIPID_TRANSPORT_signal	GO_PROTEIN_TRANSPORT_ALONG_MICROTUBULE_signal
GO_ORGANIC_ACID_TRANSMEMBRANE_TRANSPORT_signal	GO_FOREBRAIN_REGIONALIZATION_signal
GO_AMINO_ACID_TRANSMEMBRANE_TRANSPORT_signal	GO_BETA_CATENIN_TCF_COMPLEX_ASSEMBLY_signal
GO_RESPONSE_TO_THYROID_HORMONE_signal	GO_TELOMERE_CAPPING_signal
GO_RESPONSE_TO_LEAD_ION_signal	GO_NEGATIVE_REGULATION_OF_MEGAKARYOCYTE_DIFFERENTIATION_signal
GO_GLYOXYLATE_METABOLIC_PROCESS_signal	GO_NEGATIVE_REGULATION_OF_HEMATOPOIETIC_PROGENITOR_CELL_DIFFERENTIATION_signal
GO_CELLULAR_ALDEHYDE_METABOLIC_PROCESS_signal	GO_PROTEIN_HETEROTETRAMERIZATION_signal
GO_PHOSPHOLIPID_DEPHOSPHORYLATION_signal	GO_DNA_REPLICATION_DEPENDENT_NUCLEOSOME_ORGANIZATION_signal
GO_PHOSPHATIDYLINOSITOL_DEPHOSPHORYLATION_signal	GO_CHROMATIN_SILENCING_AT_RDNA_signal
GO_DICARBOXYLIC_ACID_METABOLIC_PROCESS_signal	GO_CENTROMERE_COMPLEX_ASSEMBLY_signal
GO_DRUG_TRANSPORT_signal	GO_HISTONE_EXCHANGE_signal
GO_COFACTOR_TRANSPORT_signal	GO_PROTEIN_KINASE_C_ACTIVATING_G_PROTEIN_COUPLED_RECEPTOR_SIGNALING_PATHWAY_signal
GO_VITAMIN_TRANSPORT_signal	GO_MATING_signal
GO_RIBONUCLEOSIDE_CATABOLIC_PROCESS_signal	GO_REPRODUCTIVE_BEHAVIOR_signal
GO_IRON_ION_HOMEOSTASIS_signal	GO_MATING_BEHAVIOR_signal
GO_ALCOHOL_BIOSYNTHETIC_PROCESS_signal	GO_FEEDING_BEHAVIOR_signal
GO_SMALL_MOLECULE_BIOSYNTHETIC_PROCESS_signal	GO_NEUROPEPTIDE_SIGNALING_PATHWAY_signal
GO_POLYOL_BIOSYNTHETIC_PROCESS_signal	GO_NEGATIVE_REGULATION_OF_AMINE_TRANSPORT_signal
GO_MONOSACCHARIDE_BIOSYNTHETIC_PROCESS_signal	GO_RETINAL_GANGLION_CELL_AXON_GUIDANCE_signal
GO_CARBOHYDRATE_BIOSYNTHETIC_PROCESS_signal	GO_MOTOR_NEURON_AXON_GUIDANCE_signal
GO_OXIDOREDUCTION_COENZYME_METABOLIC_PROCESS_signal	GO_INNERVATION_signal
GO_GLUCOSE_CATABOLIC_PROCESS_signal	GO_DENDRITE_DEVELOPMENT_signal
GO_NAD_METABOLIC_PROCESS_signal	GO_REGULATION_OF_DENDRITIC_SPINE_MORPHOGENESIS_signal
GO_NADH_METABOLIC_PROCESS_signal	GO_REGULATION_OF_DENDRITIC_SPINE_DEVELOPMENT_signal
GO_NUCLEOTIDE_PHOSPHORYLATION_signal	GO_POSITIVE_REGULATION_OF_DENDRITIC_SPINE_DEVELOPMENT_signal
GO_ATP_GENERATION_FROM_ADP_signal	GO_REGULATION_OF_DENDRITE_MORPHOGENESIS_signal
GO_ADP_METABOLIC_PROCESS_signal	GO_REGULATION_OF_DENDRITE_DEVELOPMENT_signal
GO_NUCLEOSIDE_DIPHOSPHATE_METABOLIC_PROCESS_signal	GO_POSITIVE_REGULATION_OF_DENDRITE_MORPHOGENESIS_signal
GO_RIBONUCLEOSIDE_DIPHOSPHATE_METABOLIC_PROCESS_signal	GO_REGULATION_OF_CLATHRIN_MEDIATED_ENDOCYTOSIS_signal
GO_PYRUVATE_METABOLIC_PROCESS_signal	GO_EXPLORATION_BEHAVIOR_signal
GO_COFACTOR_BIOSYNTHETIC_PROCESS_signal	GO_SYNAPTIC_TRANSMISSION_GLUTAMATERGIC_signal
GO_COFACTOR_METABOLIC_PROCESS_signal	GO_NEURON_NEURON_SYNAPTIC_TRANSMISSION_signal
GO_COENZYME_METABOLIC_PROCESS_signal	GO_FEAR_RESPONSE_signal
GO_CELLULAR_CARBOHYDRATE_METABOLIC_PROCESS_signal	GO_MULTICELLULAR_ORGANISMAL_RESPONSE_TO_STRESS_signal
GO_ENERGY_RESERVE_METABOLIC_PROCESS_signal	GO_LEARNING_signal
GO_GLUCAN_METABOLIC_PROCESS_signal	GO_SINGLE_ORGANISM_BEHAVIOR_signal
GO_AEROBIC_RESPIRATION_signal	GO_REGULATION_OF_SYNAPTIC_TRANSMISSION_GLUTAMATERGIC_signal
GO_MITOCHONDRIAL_RESPIRATORY_CHAIN_COMPLEX_I_BIOGENESIS_signal	GO_SYNAPTIC_SIGNALING_signal
GO_MITOCHONDRIAL_RESPIRATORY_CHAIN_COMPLEX_ASSEMBLY_signal	GO_CALCIUM_ION_REGULATED_EXOCYTOSIS_OF_NEUROTRANSMITTER_signal
GO_OXIDATIVE_PHOSPHORYLATION_signal	GO_POSITIVE_REGULATION_OF_CALCIUM_ION_DEPENDENT_EXOCYTOSIS_signal
GO_ELECTRON_TRANSPORT_CHAIN_signal	GO_REGULATION_OF_CALCIUM_ION_DEPENDENT_EXOCYTOSIS_signal
GO_CELLULAR_RESPIRATION_signal	GO_REGULATION_OF_NEUROTRANSMITTER_SECRETION_signal
GO_ENERGY_DERIVATION_BY_OXIDATION_OF_ORGANIC_COMPOUNDS_signal	GO_REGULATION_OF_NEUROTRANSMITTER_TRANSPORT_signal
GO_GENERATION_OF_PRECURSOR_METABOLITES_AND_ENERGY_signal	GO_REGULATION_OF_SYNAPTIC_VESICLE_TRANSPORT_signal
GO_NUCLEOSIDE_TRIPHOSPHATE_METABOLIC_PROCESS_signal	GO_SYNAPTIC_VESICLE_CYCLE_signal
GO_NUCLEOSIDE_MONOPHOSPHATE_METABOLIC_PROCESS_signal	GO_PRESYNAPTIC_PROCESS_INVOLVED_IN_SYNAPTIC_TRANSMISSION_signal
GO_GLYCOSYL_COMPOUND_METABOLIC_PROCESS_signal	GO_REGULATION_OF_NEUROTRANSMITTER_LEVELS_signal
GO_NUCLEOBASE_CONTAINING_SMALL_MOLECULE_METABOLIC_PROCESS_signal	GO_SIGNAL_RELEASE_signal
GO_PURINE_CONTAINING_COMPOUND_METABOLIC_PROCESS_signal	GO_REGULATION_OF_ALPHA_AMINO_3_HYDROXY_5_METHYL_4_ISOXAZOLE_PROPIONATE_SELECTIVE_GLUTAMATE_RECEPTOR_ACTIVITY_signal
GO_MITOCHONDRIAL_ELECTRON_TRANSPORT_CYTOCHROME_C_TO_OXYGEN_signal	GO_POSITIVE_REGULATION_OF_EXCITATORY_POSTSYNAPTIC_POTENTIAL_signal
GO_ATP_HYDROLYSIS_COUPLED_TRANSMEMBRANE_TRANSPORT_signal	GO_MODULATION_OF_EXCITATORY_POSTSYNAPTIC_POTENTIAL_signal
GO_SODIUM_ION_HOMEOSTASIS_signal	GO_REGULATION_OF_NEURONAL_SYNAPTIC_PLASTICITY_signal
GO_CELLULAR_SODIUM_ION_HOMEOSTASIS_signal	GO_REGULATION_OF_SYNAPSE_ORGANIZATION_signal
GO_POTASSIUM_ION_IMPORT_signal	GO_REGULATION_OF_SYNAPSE_ASSEMBLY_signal
GO_HYDROGEN_ION_TRANSMEMBRANE_TRANSPORT_signal	GO_POSITIVE_REGULATION_OF_SYNAPSE_ASSEMBLY_signal
GO_HYDROGEN_TRANSPORT_signal	GO_REGULATION_OF_SYNAPSE_STRUCTURE_OR_ACTIVITY_signal
GO_SODIUM_ION_TRANSPORT_signal	GO_REGULATION_OF_SYNAPTIC_PLASTICITY_signal
GO_MONOVALENT_INORGANIC_CATION_TRANSPORT_signal	GO_MODULATION_OF_SYNAPTIC_TRANSMISSION_signal
GO_HEME_BIOSYNTHETIC_PROCESS_signal	GO_POSITIVE_REGULATION_OF_SYNAPTIC_TRANSMISSION_signal
GO_TETRAPYRROLE_BIOSYNTHETIC_PROCESS_signal	GO_LONG_TERM_SYNAPTIC_POTENTIATION_signal
GO_TETRAPYRROLE_METABOLIC_PROCESS_signal
GO_HEME_METABOLIC_PROCESS_signal
GO_PORPHYRIN_CONTAINING_COMPOUND_METABOLIC_PROCESS_signal
