# Supplementary material for: Distinct Genetic Signatures of Cortical and Subcortical Regions Associated with Human Memory
Source: eNeuro. 2019 Dec 13;6(6):ENEURO.0283-19.2019. doi: 10.1523/ENEURO.0283-19.2019 (PMC6917897; doi:10.1523/ENEURO.0283-19.2019)
Supplement: Extended Data Table 3-1 — Candidate genes for the cortical memory analysis. Literature review for the candidate genes derived from the LEA of cortical memory gene sets, ranked by the number of gene sets it is found in. Download Table 3-1, XLSX file. [file sup_enu-eN-NWR-0283-19-s12.xlsx]

## Sheet: Summary
Legend			METHOD SPECIFICITY SCORING
Gene	Memory function (strong evidence)		Candidate gene list	Memory Cortical +	Memory Cortical -
Gene	Memory function (weak evidence)		Genes with Mems	4	10
Gene	No evidence for either		Genes with Memw	5	0
			Genes with Mots	1	0
			Genes with Motw	0	10
Legend			All candidate gene lists
Mems	Memory function (strong evidence)		Candidate gene list	Memory cortical +	Memory cortical -
Memw	Memory function (weak evidence)			PRKCD	HIST1H4A
				RAC1	HIST1H4E
				HLA-DRB5	HIST1H4H
				HLA-DRB1	HIST1H4I
			Candidate genes per list	HLA-DRB4	HIST4H4
				HCK	HIST1H4J
				HLA-DRB3	HIST1H4B
				LIMK1	HIST1H4K
				CDC42	HIST1H4F
				VAV1	HIST1H4D

## Sheet: Memory Cortical (+)
Gene symbol	No. of genesets	Mean r-value	Function	Mems		Memw		Mots		Motw
PRKCD	9	0.102133	Memory	Conboy, L., Foley, A. G., O’Boyle, N. M., Lawlor, M., Gallagher, H. C., Murphy, K. J., & Regan, C. M. (2009). Curcumin-induced degradation of PKCδ is associated with enhanced dentate NCAM PSA expression and spatial learning in adult and aged Wistar rats. Biochemical Pharmacology, 77(7), 1254–1265. https://doi.org/10.1016/j.bcp.2008.12.011
RAC1	9	0.073471	Memory	Oh, D., Han, S., Seo, J., Lee, J.-R., Choi, J., Groffen, J., … Kim, E. (2010). Regulation of Synaptic Rac1 Activity, Long-Term Potentiation Maintenance, and Learning and Memory by BCR and ABR Rac GTPase-Activating Proteins. Journal of Neuroscience, 30(42), 14134–14144. https://doi.org/10.1523/JNEUROSCI.1711-10.2010
HLA-DRB5	8	0.121916	Memory-related			Yokoyama, J. S., Wang, Y., Schork, A. J., Thompson, W. K., Karch, C. M., Cruchaga, C., ... & Brewer, J. B. (2016). Association between genetic traits for immune-mediated diseases and Alzheimer disease. JAMA neurology, 73(6), 691-697.	Yu, L., Chibnik, L. B., Srivastava, G. P., Pochet, N., Yang, J., Xu, J., ... & Meissner, A. (2015). Association of Brain DNA methylation in SORL1, ABCA7, HLA-DRB5, SLC24A4, and BIN1 with pathological diagnosis of Alzheimer disease. JAMA neurology, 72(1), 15-24.
HLA-DRB1	8	0.093495	Memory-related			Lambert, J. C., Ibrahim-Verbaas, C. A., Harold, D., Naj, A. C., Sims, R., Bellenguez, C., ... & Grenier-Boley, B. (2013). Meta-analysis of 74,046 individuals identifies 11 new susceptibility loci for Alzheimer's disease. Nature genetics, 45(12), 1452.	Steele, N. Z., Carr, J. S., Bonham, L. W., Geier, E. G., Damotte, V., Miller, Z. A., ... & Kauwe, J. S. (2017). Fine-mapping of the human leukocyte antigen locus as a risk factor for Alzheimer disease: A case–control study. PLoS medicine, 14(3), e1002272.
HLA-DRB4	8	0.092345	Memory-related			Lambert, J. C., Ibrahim-Verbaas, C. A., Harold, D., Naj, A. C., Sims, R., Bellenguez, C., ... & Grenier-Boley, B. (2013). Meta-analysis of 74,046 individuals identifies 11 new susceptibility loci for Alzheimer's disease. Nature genetics, 45(12), 1452.
HCK	8	0.085236	Memory-related			Lim, S. L., Tran, D. N., Zumkehr, J., Chen, C., Ghiaar, S., Kieu, Z., ... & Kitazawa, M. (2018). Inhibition of hematopoietic cell kinase dysregulates microglial function and accelerates early stage Alzheimer's disease‐like neuropathology. Glia, 66(12), 2700-2718.
HLA-DRB3	8	0.077858	-
LIMK1	7	0.133028	Memory	Meng, Y., Zhang, Y., Tregoubov, V., Janus, C., Cruz, L., Jackson, M., ... & Jia, Z. (2002). Abnormal spine morphology and enhanced LTP in LIMK-1 knockout mice. Neuron, 35(1), 121-133.				Meng, Y., Zhang, Y., Tregoubov, V., Janus, C., Cruz, L., Jackson, M., ... & Jia, Z. (2002). Abnormal spine morphology and enhanced LTP in LIMK-1 knockout mice. Neuron, 35(1), 121-133.
CDC42	7	0.113449	Memory	Zhang, X., Li, Q., Wang, L., Liu, Z. J., & Zhong, Y. (2016). Cdc42-Dependent Forgetting Regulates Repetition Effect in Prolonging Memory Retention. Cell Reports, 16(3), 817–825. https://doi.org/10.1016/j.celrep.2016.06.041
VAV1	6	0.149818	Memory-related		Zhou, Y., Wang, Z. F., Li, W., Hong, H., Chen, J., Tian, Y., & Liu, Z. Y. (2018). Protective effects of microRNA-330 on amyloid β-protein production, oxidative stress, and mitochondrial dysfunction in Alzheimer’s disease by targeting VAV1 via the MAPK signaling pathway. Journal of Cellular Biochemistry, 119(7), 5437–5448. https://doi.org/10.1002/jcb.26700
HLA-DRA	6	0.147508
HLA-DPA1	6	0.141705
MAPK3	6	0.115937
HLA-DPB1	6	0.089566
FYN	6	0.088327
PTK2	6	0.079012
ACTG1	6	0.07768
HLA-DQB1	6	0.065886
HSP90AA1	6	0.061385
WIPF3	5	0.159604
ACTR3	5	0.140581
PLCG2	5	0.137111
CYFIP2	5	0.123815
FCGR2A	5	0.118664
FCGR3A	5	0.110595
HSP90AB1	5	0.107671
FCGR1B	5	0.106201
MAPK1	5	0.100928
BAIAP2	5	0.093905
NCKAP1	5	0.090616
VAV2	5	0.083552
ELMO2	5	0.076364
ARPC3	5	0.072175
ARPC4	5	0.07212
DOCK1	5	0.070826
SYK	5	0.064049
ELMO1	5	0.061148
ARPC1B	5	0.058053
CD247	5	0.05565
WNT5A	4	0.176106
CAMK2D	4	0.109869
CALM2	4	0.105003
UBA52	4	0.103991
HMGB1	4	0.100143
RIPK2	4	0.094236
IRF7	4	0.093744
TLR3	4	0.077191
HLA-G	4	0.071145
SMAD3	4	0.068982
CALM1	4	0.068076
ITGB1BP1	4	0.064298
ACTB	4	0.051587
PLCG1	4	0.050848
S100A10	3	0.208326
WNT4	3	0.168384
FKBP1B	3	0.156333
FCGRT	3	0.143788
TLR2	3	0.136738
PSMD5	3	0.134918
JAK1	3	0.125265
NRP1	3	0.12471
NR4A3	3	0.123565
LY96	3	0.123112
NRAS	3	0.121187
PAK3	3	0.11752
TRIM22	3	0.11289
MT2A	3	0.110258
UBE2N	3	0.107915
HRAS	3	0.099371
PSMD13	3	0.091552
TLR4	3	0.090742
CCL19	3	0.08916
IFNGR2	3	0.089093
FGF2	3	0.088448
PSMA3	3	0.088073
UBE2D2	3	0.086814
HLA-C	3	0.08388
FKBP1A	3	0.079698
PFN2	3	0.077576
PSME3	3	0.074645
BTRC	3	0.073392
AIF1	3	0.073388
PSMC5	3	0.072709
NOTCH1	3	0.072569
STAT1	3	0.071362
PSMB4	3	0.071101
LAT2	3	0.07015
PTEN	3	0.068921
HLA-E	3	0.06835
PSMB2	3	0.06812
RHOA	3	0.066098
FBXW11	3	0.066002
IFI30	3	0.065671
PSMC1	3	0.065342
MID1	3	0.064849
PSMC6	3	0.064468
TAB2	3	0.063131
GBP2	3	0.061891
HAVCR2	3	0.061734
CSK	3	0.061256
HLA-H	3	0.059743
PSMD14	3	0.059614
CHUK	3	0.058049
RPS27A	3	0.049957
SULF2	2	0.155322
CTGF	2	0.155125
NTSR1	2	0.152664
MNDA	2	0.128708
SOS1	2	0.127425
SEMA5A	2	0.126967
ASS1	2	0.126542
PYDC1	2	0.12512
TLR1	2	0.12354
ANXA2	2	0.122202
IL1B	2	0.119916
SKAP1	2	0.117605
PDGFRA	2	0.117079
AQP4	2	0.116659
PIK3CD	2	0.114955
PTGER3	2	0.108632
CD58	2	0.10861
CLASP2	2	0.105173
GSTM2	2	0.099748
JUN	2	0.096228
TNFRSF21	2	0.095602
KIT	2	0.093986
WNT11	2	0.091409
PPM1E	2	0.09064
PTPRC	2	0.088868
FHOD1	2	0.087112
CCL2	2	0.086082
SWAP70	2	0.084896
SCFD1	2	0.084479
CD38	2	0.083054
TREM2	2	0.082967
TAC1	2	0.081906
MARCO	2	0.081089
SYNCRIP	2	0.080859
ZAP70	2	0.079555
ROBO1	2	0.076327
APOE	2	0.07595
RFTN2	2	0.0759
SHANK1	2	0.074543
MAP2K4	2	0.073843
LPAR1	2	0.068945
COLEC12	2	0.068657
SPPL3	2	0.06824
AMOT	2	0.066653
FOS	2	0.065319
SPG21	2	0.063462
SLC30A1	2	0.062731
TPM1	2	0.062078
CHMP4A	2	0.061849
SRI	2	0.061497
BAG4	2	0.061001
CLASP1	2	0.060757
C5	2	0.059977
PLN	2	0.05906
CORO1C	2	0.057474
PSMD12	2	0.055482
SHC1	2	0.054635
MAPK8	2	0.053008
CLIC2	2	0.052496
EFNB2	2	0.051093
PSMB10	2	0.050574
PSMD1	2	0.050463
CD24	2	0.050213
PSMB3	2	0.04956
TRIM27	2	0.048789
BRK1	2	0.047747
MYO10	2	0.042298
ABI1	2	0.041806
ARPC1A	2	0.041442
ARPC2	2	0.041296
ARPC5	2	0.04102
CHMP4B	2	0.04092
FZD7	1	0.199759
RPL27A	1	0.193285
SUSD4	1	0.191983
DCN	1	0.18629
FZD1	1	0.182363
GABRA5	1	0.18229
CNIH3	1	0.172145
PRR5	1	0.167173
NR2F2	1	0.163773
NPY	1	0.156548
MAP2	1	0.154654
SSC5D	1	0.152087
RSPO3	1	0.150225
PRKCG	1	0.150211
CDH11	1	0.144106
SULF1	1	0.1422
FEZF2	1	0.142077
MAPKAP1	1	0.137122
TEK	1	0.136979
GABRB1	1	0.135692
CDC42SE2	1	0.12916
PTPRR	1	0.128251
SLITRK6	1	0.127674
DDX60	1	0.127451
AP2B1	1	0.124866
STXBP3	1	0.123957
RAB10	1	0.123185
CNIH2	1	0.123114
CHMP1B	1	0.12198
KLK7	1	0.121911
CASK	1	0.120696
CFD	1	0.120658
PRKG1	1	0.118737
KDR	1	0.118185
DCC	1	0.117387
TFG	1	0.11694
TMED10	1	0.11567
ATP8A2	1	0.115126
LRRTM1	1	0.114309
KLHL12	1	0.11291
CCBE1	1	0.111989
PROS1	1	0.111599
RELN	1	0.111013
DNAJB1	1	0.110423
IFITM2	1	0.110291
BIRC3	1	0.109357
TUB	1	0.109135
SLIT1	1	0.107373
ABCA1	1	0.107034
KYNU	1	0.106726
WWTR1	1	0.10639
EFNB3	1	0.105985
GABRB3	1	0.105745
STK39	1	0.105426
HMOX1	1	0.105375
DNAJC7	1	0.105033
GRIA1	1	0.104782
TMEFF2	1	0.104298
SLIT3	1	0.102415
CD59	1	0.102167
IL4R	1	0.101271
ANK3	1	0.099973
DLG2	1	0.099954
NR4A2	1	0.099831
RPS20	1	0.098298
C1QA	1	0.097805
TSKU	1	0.097638
DNAJA4	1	0.097311
KCNAB1	1	0.097058
SRPX	1	0.096625
RPS12	1	0.096286
MEGF11	1	0.096254
F12	1	0.096234
MCFD2	1	0.096028
IFITM3	1	0.095392
YWHAQ	1	0.095168
RAP2B	1	0.094801
VSIG4	1	0.094537
WFDC1	1	0.094311
TLN1	1	0.093465
NPHS1	1	0.091749
SAR1B	1	0.091749
KCNQ1	1	0.091624
LY86	1	0.091504
SLC7A11	1	0.091462
GULP1	1	0.090985
VAPB	1	0.089955
ARHGAP6	1	0.08945
NSF	1	0.089381
TSG101	1	0.089216
MYD88	1	0.089187
CEP112	1	0.088615
CHMP2B	1	0.088575
RASGRP1	1	0.088546
RPL37	1	0.088343
NLGN1	1	0.086911
DNAJA2	1	0.086503
ICAM5	1	0.086415
IL33	1	0.086397
CXADR	1	0.086238
FGFR1	1	0.085978
TNFRSF14	1	0.085603
ATF5	1	0.08549
SEMA3E	1	0.085467
TUSC2	1	0.085103
OAZ2	1	0.084519
DLC1	1	0.084018
SYNJ2BP	1	0.083486
MYO7A	1	0.082761
SKAP2	1	0.082692
AHCY	1	0.082016
ZC3HAV1	1	0.081291
PTGER4	1	0.080944
FNBP1L	1	0.080185
TCTN1	1	0.079539
ANGPT1	1	0.078838
CAB39	1	0.078689
RGS19	1	0.078638
ST13	1	0.078571
CD74	1	0.078271
TNIP3	1	0.078248
ROBO2	1	0.078109
OAZ3	1	0.078077
METAP1	1	0.077764
PECAM1	1	0.076659
CYLD	1	0.076156
HSPB1	1	0.075434
SNX3	1	0.075146
RPL30	1	0.074999
TGM2	1	0.074726
RPL35A	1	0.074455
IFITM1	1	0.07358
SFRP2	1	0.073369
C1QB	1	0.071957
SERPINA1	1	0.071726
TRAPPC2	1	0.07163
BTG2	1	0.071446
CD63	1	0.071428
ANKRD28	1	0.071412
RPL23A	1	0.07132
GBF1	1	0.07124
PTPRG	1	0.070844
FAU	1	0.070287
TRAPPC2L	1	0.07006
VAMP7	1	0.070005
FLNA	1	0.069956
CFH	1	0.069671
PTPN11	1	0.069277
HDAC5	1	0.068987
PTPN23	1	0.068632
SNAP91	1	0.068561
CD55	1	0.068533
S1PR1	1	0.068399
RPL12	1	0.06814
DACT3	1	0.068071
HSPA1A	1	0.067764
CSF1R	1	0.066555
STRAP	1	0.066264
BAG1	1	0.065991
UNC93B1	1	0.065823
GJA1	1	0.065804
ANGPT2	1	0.064836
RPS27	1	0.064736
RPS24	1	0.063907
P2RY12	1	0.06283
CHMP1A	1	0.062767
RPL6	1	0.062532
NEDD4L	1	0.062443
SEC63	1	0.062074
SRP9	1	0.062064
RPL31	1	0.061904
CTNNA3	1	0.061813
HSPA6	1	0.061583
PPIF	1	0.060497
KANK1	1	0.060421
CRBN	1	0.060376
CLIC1	1	0.060257
MYL9	1	0.059602
ITGAM	1	0.059086
CD109	1	0.059085
RPL26L1	1	0.058663
ATP8A1	1	0.058571
SEC24D	1	0.058447
C3	1	0.058171
PRKCA	1	0.058025
AP2S1	1	0.057954
RPL39	1	0.05733
RPS6	1	0.057213
GNAQ	1	0.05692
EDN1	1	0.056638
ADRB2	1	0.056343
RPS29	1	0.055775
CDH13	1	0.055701
RPL19	1	0.055459
EIF2AK1	1	0.055263
RPL41	1	0.054983
VTA1	1	0.054785
PARVA	1	0.054288
FOLR1	1	0.054224
SEC24A	1	0.054038
CDK5	1	0.05383
SASH1	1	0.053461
CHMP6	1	0.053352
DLG1	1	0.053144
RAB34	1	0.052455
RPL32	1	0.052289
VPS4B	1	0.052168
RPL35	1	0.052108
KLK5	1	0.051841
GRK6	1	0.051783
MMRN2	1	0.05165
RPL27	1	0.05158
CEBPE	1	0.051048
SRP19	1	0.051006
RPL29	1	0.0508
RPL26	1	0.050784
MFGE8	1	0.050586
OAZ1	1	0.050355
RPL34	1	0.050304
DHX58	1	0.050293
RAB1A	1	0.049529
DLG4	1	0.049228
VPS37C	1	0.049211
ARF1	1	0.049205
ANKRD17	1	0.048827
RAB14	1	0.048687
RPS17	1	0.0486
VPS37B	1	0.048197
RPS18	1	0.0479
EMD	1	0.047779
VASH1	1	0.046176
NEDD4	1	0.046102
CSNK1A1	1	0.046085
RGS20	1	0.045317
RPS13	1	0.045168
F8	1	0.044811
PDCD6IP	1	0.044639
RPL28	1	0.044633
PIK3C2A	1	0.043983
CORO1A	1	0.043083
SEC24C	1	0.042993
PAWR	1	0.042829
RPL23	1	0.04213
RPS25	1	0.041872
MAP2K5	1	0.041704
DACT1	1	0.041694
PUM2	1	0.041041
CYBA	1	0.040923
SEC61G	1	0.040252
GOLPH3	1	0.040173
PPP6R1	1	0.040131
SP100	1	0.039323
RPL21	1	0.038831
RPLP1	1	0.038668
CSNK2B	1	0.038511
SRP54	1	0.037672
RPL36	1	0.037371
RPS9	1	0.035754
RPS15A	1	0.035751
STARD13	1	0.035748
RAB3GAP1	1	0.035658
PTPRM	1	0.034227
RPS4X	1	0.034212
RPS21	1	0.03375
SEC62	1	0.03319
RPS3A	1	0.033053
RPL24	1	0.029822
RPL10A	1	0.02962
RPL4	1	0.029206
RPS4Y1	1	0.027862
RPLP0	1	0.027667
SPCS2	1	0.026792
RPS26	1	0.026569
RPS10	1	0.026472
RPS14	1	0.026089
RPS23	1	0.024719
RAB3GAP2	1	0.024258
SPCS1	1	0.023423
RPL22	1	0.023398
RPS2	1	0.023112

## Sheet: Memory Cortical (-)
Gene symbol	No. of genesets	Mean r-value	Function	Mems		Memw		Mots		Motw
HIST1H4A	23	-0.175205	Memory	Peleg, S., Sananbenesi, F., Zovoilis, A., Burkhardt, S., Bahari-Javan, S., Agis-Balboa, R. C., … Fischer, A. (2010). Altered Histone Acetylation Is Associated with Age-Dependent Memory Impairment in Mice. Science, 328(5979), 753–756. https://doi.org/10.1126/science.1186088	Peixoto, L., & Abel, T. (2013). The role of histone acetylation in memory formation and cognitive impairments. Neuropsychopharmacology, 38(1), 62.					Sandi, C., Pinto, R. M., Al-Mahdawi, S., Ezzatizadeh, V., Barnes, G., Jones, S., ... & Pook, M. A. (2011). Prolonged treatment with pimelic o-aminobenzamide HDAC inhibitors ameliorates the disease phenotype of a Friedreich ataxia mouse model. Neurobiology of disease, 42(3), 496-505.	Valor, L. M., Guiretti, D., Lopez-Atalaya, J. P., & Barco, A. (2013). Genomic landscape of transcriptional and epigenetic dysregulation in early onset polyglutamine disease. Journal of Neuroscience, 33(25), 10471-10482.
HIST1H4E	23	-0.165325	Memory	Peleg, S., Sananbenesi, F., Zovoilis, A., Burkhardt, S., Bahari-Javan, S., Agis-Balboa, R. C., … Fischer, A. (2010). Altered Histone Acetylation Is Associated with Age-Dependent Memory Impairment in Mice. Science, 328(5979), 753–756. https://doi.org/10.1126/science.1186088	Peixoto, L., & Abel, T. (2013). The role of histone acetylation in memory formation and cognitive impairments. Neuropsychopharmacology, 38(1), 62.					Sandi, C., Pinto, R. M., Al-Mahdawi, S., Ezzatizadeh, V., Barnes, G., Jones, S., ... & Pook, M. A. (2011). Prolonged treatment with pimelic o-aminobenzamide HDAC inhibitors ameliorates the disease phenotype of a Friedreich ataxia mouse model. Neurobiology of disease, 42(3), 496-505.	Valor, L. M., Guiretti, D., Lopez-Atalaya, J. P., & Barco, A. (2013). Genomic landscape of transcriptional and epigenetic dysregulation in early onset polyglutamine disease. Journal of Neuroscience, 33(25), 10471-10482.
HIST1H4H	23	-0.125473	Memory	Peleg, S., Sananbenesi, F., Zovoilis, A., Burkhardt, S., Bahari-Javan, S., Agis-Balboa, R. C., … Fischer, A. (2010). Altered Histone Acetylation Is Associated with Age-Dependent Memory Impairment in Mice. Science, 328(5979), 753–756. https://doi.org/10.1126/science.1186088	Peixoto, L., & Abel, T. (2013). The role of histone acetylation in memory formation and cognitive impairments. Neuropsychopharmacology, 38(1), 62.					Sandi, C., Pinto, R. M., Al-Mahdawi, S., Ezzatizadeh, V., Barnes, G., Jones, S., ... & Pook, M. A. (2011). Prolonged treatment with pimelic o-aminobenzamide HDAC inhibitors ameliorates the disease phenotype of a Friedreich ataxia mouse model. Neurobiology of disease, 42(3), 496-505.	Valor, L. M., Guiretti, D., Lopez-Atalaya, J. P., & Barco, A. (2013). Genomic landscape of transcriptional and epigenetic dysregulation in early onset polyglutamine disease. Journal of Neuroscience, 33(25), 10471-10482.
HIST1H4I	23	-0.119042	Memory	Peleg, S., Sananbenesi, F., Zovoilis, A., Burkhardt, S., Bahari-Javan, S., Agis-Balboa, R. C., … Fischer, A. (2010). Altered Histone Acetylation Is Associated with Age-Dependent Memory Impairment in Mice. Science, 328(5979), 753–756. https://doi.org/10.1126/science.1186088	Peixoto, L., & Abel, T. (2013). The role of histone acetylation in memory formation and cognitive impairments. Neuropsychopharmacology, 38(1), 62.					Sandi, C., Pinto, R. M., Al-Mahdawi, S., Ezzatizadeh, V., Barnes, G., Jones, S., ... & Pook, M. A. (2011). Prolonged treatment with pimelic o-aminobenzamide HDAC inhibitors ameliorates the disease phenotype of a Friedreich ataxia mouse model. Neurobiology of disease, 42(3), 496-505.	Valor, L. M., Guiretti, D., Lopez-Atalaya, J. P., & Barco, A. (2013). Genomic landscape of transcriptional and epigenetic dysregulation in early onset polyglutamine disease. Journal of Neuroscience, 33(25), 10471-10482.
HIST4H4	23	-0.110557	Memory	Peleg, S., Sananbenesi, F., Zovoilis, A., Burkhardt, S., Bahari-Javan, S., Agis-Balboa, R. C., … Fischer, A. (2010). Altered Histone Acetylation Is Associated with Age-Dependent Memory Impairment in Mice. Science, 328(5979), 753–756. https://doi.org/10.1126/science.1186088	Peixoto, L., & Abel, T. (2013). The role of histone acetylation in memory formation and cognitive impairments. Neuropsychopharmacology, 38(1), 62.					Sandi, C., Pinto, R. M., Al-Mahdawi, S., Ezzatizadeh, V., Barnes, G., Jones, S., ... & Pook, M. A. (2011). Prolonged treatment with pimelic o-aminobenzamide HDAC inhibitors ameliorates the disease phenotype of a Friedreich ataxia mouse model. Neurobiology of disease, 42(3), 496-505.	Valor, L. M., Guiretti, D., Lopez-Atalaya, J. P., & Barco, A. (2013). Genomic landscape of transcriptional and epigenetic dysregulation in early onset polyglutamine disease. Journal of Neuroscience, 33(25), 10471-10482.
HIST1H4J	23	-0.108773	Memory	Peleg, S., Sananbenesi, F., Zovoilis, A., Burkhardt, S., Bahari-Javan, S., Agis-Balboa, R. C., … Fischer, A. (2010). Altered Histone Acetylation Is Associated with Age-Dependent Memory Impairment in Mice. Science, 328(5979), 753–756. https://doi.org/10.1126/science.1186088	Peixoto, L., & Abel, T. (2013). The role of histone acetylation in memory formation and cognitive impairments. Neuropsychopharmacology, 38(1), 62.					Sandi, C., Pinto, R. M., Al-Mahdawi, S., Ezzatizadeh, V., Barnes, G., Jones, S., ... & Pook, M. A. (2011). Prolonged treatment with pimelic o-aminobenzamide HDAC inhibitors ameliorates the disease phenotype of a Friedreich ataxia mouse model. Neurobiology of disease, 42(3), 496-505.	Valor, L. M., Guiretti, D., Lopez-Atalaya, J. P., & Barco, A. (2013). Genomic landscape of transcriptional and epigenetic dysregulation in early onset polyglutamine disease. Journal of Neuroscience, 33(25), 10471-10482.
HIST1H4B	23	-0.100063	Memory	Peleg, S., Sananbenesi, F., Zovoilis, A., Burkhardt, S., Bahari-Javan, S., Agis-Balboa, R. C., … Fischer, A. (2010). Altered Histone Acetylation Is Associated with Age-Dependent Memory Impairment in Mice. Science, 328(5979), 753–756. https://doi.org/10.1126/science.1186088	Peixoto, L., & Abel, T. (2013). The role of histone acetylation in memory formation and cognitive impairments. Neuropsychopharmacology, 38(1), 62.					Sandi, C., Pinto, R. M., Al-Mahdawi, S., Ezzatizadeh, V., Barnes, G., Jones, S., ... & Pook, M. A. (2011). Prolonged treatment with pimelic o-aminobenzamide HDAC inhibitors ameliorates the disease phenotype of a Friedreich ataxia mouse model. Neurobiology of disease, 42(3), 496-505.	Valor, L. M., Guiretti, D., Lopez-Atalaya, J. P., & Barco, A. (2013). Genomic landscape of transcriptional and epigenetic dysregulation in early onset polyglutamine disease. Journal of Neuroscience, 33(25), 10471-10482.
HIST1H4K	23	-0.097262	Memory	Peleg, S., Sananbenesi, F., Zovoilis, A., Burkhardt, S., Bahari-Javan, S., Agis-Balboa, R. C., … Fischer, A. (2010). Altered Histone Acetylation Is Associated with Age-Dependent Memory Impairment in Mice. Science, 328(5979), 753–756. https://doi.org/10.1126/science.1186088	Peixoto, L., & Abel, T. (2013). The role of histone acetylation in memory formation and cognitive impairments. Neuropsychopharmacology, 38(1), 62.					Sandi, C., Pinto, R. M., Al-Mahdawi, S., Ezzatizadeh, V., Barnes, G., Jones, S., ... & Pook, M. A. (2011). Prolonged treatment with pimelic o-aminobenzamide HDAC inhibitors ameliorates the disease phenotype of a Friedreich ataxia mouse model. Neurobiology of disease, 42(3), 496-505.	Valor, L. M., Guiretti, D., Lopez-Atalaya, J. P., & Barco, A. (2013). Genomic landscape of transcriptional and epigenetic dysregulation in early onset polyglutamine disease. Journal of Neuroscience, 33(25), 10471-10482.
HIST1H4F	23	-0.09082	Memory	Peleg, S., Sananbenesi, F., Zovoilis, A., Burkhardt, S., Bahari-Javan, S., Agis-Balboa, R. C., … Fischer, A. (2010). Altered Histone Acetylation Is Associated with Age-Dependent Memory Impairment in Mice. Science, 328(5979), 753–756. https://doi.org/10.1126/science.1186088	Peixoto, L., & Abel, T. (2013). The role of histone acetylation in memory formation and cognitive impairments. Neuropsychopharmacology, 38(1), 62.					Sandi, C., Pinto, R. M., Al-Mahdawi, S., Ezzatizadeh, V., Barnes, G., Jones, S., ... & Pook, M. A. (2011). Prolonged treatment with pimelic o-aminobenzamide HDAC inhibitors ameliorates the disease phenotype of a Friedreich ataxia mouse model. Neurobiology of disease, 42(3), 496-505.	Valor, L. M., Guiretti, D., Lopez-Atalaya, J. P., & Barco, A. (2013). Genomic landscape of transcriptional and epigenetic dysregulation in early onset polyglutamine disease. Journal of Neuroscience, 33(25), 10471-10482.
HIST1H4D	23	-0.08606	Memory	Peleg, S., Sananbenesi, F., Zovoilis, A., Burkhardt, S., Bahari-Javan, S., Agis-Balboa, R. C., … Fischer, A. (2010). Altered Histone Acetylation Is Associated with Age-Dependent Memory Impairment in Mice. Science, 328(5979), 753–756. https://doi.org/10.1126/science.1186088	Peixoto, L., & Abel, T. (2013). The role of histone acetylation in memory formation and cognitive impairments. Neuropsychopharmacology, 38(1), 62.					Sandi, C., Pinto, R. M., Al-Mahdawi, S., Ezzatizadeh, V., Barnes, G., Jones, S., ... & Pook, M. A. (2011). Prolonged treatment with pimelic o-aminobenzamide HDAC inhibitors ameliorates the disease phenotype of a Friedreich ataxia mouse model. Neurobiology of disease, 42(3), 496-505.	Valor, L. M., Guiretti, D., Lopez-Atalaya, J. P., & Barco, A. (2013). Genomic landscape of transcriptional and epigenetic dysregulation in early onset polyglutamine disease. Journal of Neuroscience, 33(25), 10471-10482.
HIST1H3F	12	-0.141572
HIST1H3D	12	-0.13486
HIST1H3G	12	-0.121149
HIST1H3A	12	-0.109802
HIST1H3H	12	-0.094674
HIST1H3B	12	-0.084078
HIST1H3E	12	-0.064056
HIST1H3J	12	-0.06327
RBBP4	8	-0.063851
HIST3H3	7	-0.070466
NASP	5	-0.077447
BAHD1	5	-0.076436
CENPK	5	-0.075309
MIS18BP1	5	-0.064989
HAT1	5	-0.055385
DOT1L	4	-0.105343
HMGB2	4	-0.0989
ATAD2B	4	-0.089474
PHF8	4	-0.085696
DCLRE1A	4	-0.0826
PHF2	4	-0.058706
MECP2	4	-0.05625
BEND3	4	-0.056045
TET1	4	-0.056015
DNMT1	4	-0.038042
SIRT4	3	-0.117826
HIST1H2AE	3	-0.093189
JARID2	3	-0.090968
MTF2	3	-0.089584
DNMT3B	3	-0.081857
PAF1	3	-0.072718
H2AFZ	3	-0.068045
HIST1H2AB	3	-0.062088
DNMT3A	3	-0.055683
MSL3P1	3	-0.050381
UBR2	3	-0.049844
HIST1H2AH	3	-0.049521
RBM4	3	-0.045439
HIST1H3C	3	-0.040984
BRCA1	3	-0.040812
HIST1H1D	2	-0.192628
UIMC1	2	-0.126966
PER1	2	-0.118892
SETDB1	2	-0.108864
RIF1	2	-0.108203
NUP54	2	-0.107176
N4BP2L2	2	-0.106418
CREBZF	2	-0.103252
SUZ12	2	-0.099861
MYBBP1A	2	-0.094923
LEO1	2	-0.090609
NR2F6	2	-0.090301
RAD52	2	-0.09022
HIST1H1E	2	-0.087602
MYC	2	-0.086985
MDC1	2	-0.086948
TSPYL1	2	-0.077561
RAD51C	2	-0.077024
MEF2C	2	-0.074278
EPC1	2	-0.073749
HIST1H1A	2	-0.073071
ZNRD1	2	-0.072285
ERCC6	2	-0.071473
POLR1D	2	-0.07109
INSR	2	-0.069004
MCM2	2	-0.066101
TFIP11	2	-0.065924
TINF2	2	-0.064057
CDKN2A	2	-0.062966
DNA2	2	-0.05852
DEK	2	-0.058224
BHLHE40	2	-0.057642
ERCC4	2	-0.055711
MIER1	2	-0.055009
UPF1	2	-0.054744
TAF1C	2	-0.053841
CABIN1	2	-0.053553
PPP1CB	2	-0.05197
ID2	2	-0.049991
RBM4B	2	-0.046635
UHRF1	2	-0.04454
PML	2	-0.039456
USP2	2	-0.035193
KLF13	1	-0.164265
ZBTB16	1	-0.159366
PIF1	1	-0.155335
HR	1	-0.136675
MAFB	1	-0.134496
BCOR	1	-0.128146
TAS2R14	1	-0.121135
BCL10	1	-0.120174
RAD54B	1	-0.116384
HDAC6	1	-0.111537
PRMT7	1	-0.109744
TLE2	1	-0.107685
TRAF2	1	-0.106223
NMU	1	-0.101189
RBM15	1	-0.100752
PRKAB1	1	-0.099267
SMCHD1	1	-0.098888
ZBTB1	1	-0.097675
TAS2R13	1	-0.095707
EYA3	1	-0.095564
CHRNA2	1	-0.094732
TAS2R10	1	-0.094727
PRIM1	1	-0.093678
HELQ	1	-0.093401
TAS2R45	1	-0.092157
NCOR2	1	-0.091071
POLD3	1	-0.089672
IDE	1	-0.089559
PCNA	1	-0.088468
RECQL	1	-0.087986
NFKBIA	1	-0.086131
PINX1	1	-0.085279
TARBP2	1	-0.08347
P2RX6	1	-0.08103
TAS2R31	1	-0.080977
TCF7L2	1	-0.07945
DFFB	1	-0.078401
PALB2	1	-0.078096
HDAC4	1	-0.077667
RTEL1	1	-0.076425
POLN	1	-0.074969
PTPN2	1	-0.071551
CARTPT	1	-0.071277
CREBBP	1	-0.070637
BLM	1	-0.070175
POLD1	1	-0.069438
MEIS1	1	-0.069368
TAS2R30	1	-0.068896
SRPK1	1	-0.068826
CNOT8	1	-0.067989
APBB1	1	-0.067054
SMC2	1	-0.067008
TAS2R43	1	-0.06682
SQSTM1	1	-0.066328
TNRC6C	1	-0.065921
TDG	1	-0.064837
PAXIP1	1	-0.063773
MCM8	1	-0.062646
EXOSC10	1	-0.062468
TNNT2	1	-0.060518
CLDN3	1	-0.059252
AZGP1	1	-0.05781
SMARCC1	1	-0.056492
XRCC1	1	-0.055831
GPX1	1	-0.054666
DND1	1	-0.054089
HIST1H1C	1	-0.053999
PAPD7	1	-0.051781
NAP1L2	1	-0.051222
TAS2R50	1	-0.050783
TAF1A	1	-0.049529
NCOR1	1	-0.049482
SUV39H2	1	-0.049046
POLL	1	-0.048739
PIAS4	1	-0.048643
TAS2R20	1	-0.048624
DICER1	1	-0.04858
KDM4A	1	-0.048087
BRCC3	1	-0.047555
RPA3	1	-0.047488
HDAC8	1	-0.046954
TFAP2C	1	-0.045408
CTNNB1	1	-0.045392
SHPRH	1	-0.044963
HIST1H2BG	1	-0.044819
SMARCAD1	1	-0.044655
BAZ2A	1	-0.044469
ARID2	1	-0.044415
RECQL5	1	-0.044047
GLMN	1	-0.043347
TAF1D	1	-0.043305
TAS2R4	1	-0.043097
FMR1	1	-0.042964
TAS2R19	1	-0.042924
KDM4D	1	-0.042433
HP1BP3	1	-0.042418
TONSL	1	-0.042082
TSPYL4	1	-0.041762
DCLRE1B	1	-0.041574
FAN1	1	-0.040502
TSPYL2	1	-0.039304
ATRX	1	-0.038998
CHEK2	1	-0.038079
PKD2L1	1	-0.037652
NHEJ1	1	-0.037506
LIN28B	1	-0.037446
TAS1R1	1	-0.037385
METTL3	1	-0.037039
CNOT1	1	-0.036449
BCDIN3D	1	-0.036062
EXD2	1	-0.035584
MBD3	1	-0.035571
EZH2	1	-0.035169
TAS2R5	1	-0.034888
MBD2	1	-0.034847
CELF1	1	-0.034828
INO80	1	-0.034761
DDX1	1	-0.034643
RAD54L	1	-0.034454
TNRC6A	1	-0.034099
SMC5	1	-0.034017
CDC7	1	-0.033856
SF3B1	1	-0.033287
KAT2A	1	-0.033188
AANAT	1	-0.032971
TRIM28	1	-0.032112
SRRT	1	-0.03159
ARID4B	1	-0.031484
MBD1	1	-0.030652
CTCF	1	-0.030581
H2AFJ	1	-0.030413
BAZ1B	1	-0.030092
TERT	1	-0.030025
HELLS	1	-0.029518
ASF1A	1	-0.021916
ATAD2	1	-0.01938
ZNF304	1	-0.018995
SIRT1	1	-0.018592
