# Supplementary material for: Distinct Genetic Signatures of Cortical and Subcortical Regions Associated with Human Memory
Source: eNeuro. 2019 Dec 13;6(6):ENEURO.0283-19.2019. doi: 10.1523/ENEURO.0283-19.2019 (PMC6917897; doi:10.1523/ENEURO.0283-19.2019)
Supplement: Extended Data Table 3-2 — LEA output for the memory cortical analysis, containing genes and the significant gene sets it is shared across (FDR < 0.05) from the LEA of memory cortical analysis gene sets. Download Table 3-2, XLSX file. [file sup_enu-eN-NWR-0283-19-s13.xlsx]

## Sheet: Memory cortical +
Name	# genesets	GO_ESTABLISHMENT_OF_PROTEIN_LOCALIZATION_TO_ENDOPLASMIC_RETICULUM_signal	GO_MEMBRANE_BUDDING_signal	GO_NEGATIVE_REGULATION_OF_CALCIUM_ION_IMPORT_signal	GO_NEGATIVE_REGULATION_OF_TRANSMEMBRANE_TRANSPORT_signal	GO_PROTEIN_REFOLDING_signal	GO_HOMOTYPIC_CELL_CELL_ADHESION_signal	GO_PROTEIN_LOCALIZATION_TO_SYNAPSE_signal	GO_CENTRAL_NERVOUS_SYSTEM_NEURON_DEVELOPMENT_signal	GO_INNERVATION_signal	GO_REGULATION_OF_CATENIN_IMPORT_INTO_NUCLEUS_signal	GO_NEGATIVE_REGULATION_OF_WOUND_HEALING_signal	GO_POSITIVE_REGULATION_OF_ACTIN_FILAMENT_BUNDLE_ASSEMBLY_signal	GO_REGULATION_OF_ACTIN_FILAMENT_BUNDLE_ASSEMBLY_signal	GO_SPROUTING_ANGIOGENESIS_signal	GO_NEGATIVE_REGULATION_OF_EPITHELIAL_CELL_MIGRATION_signal	GO_POSITIVE_REGULATION_OF_RESPONSE_TO_BIOTIC_STIMULUS_signal	GO_POSITIVE_REGULATION_OF_CHEMOKINE_PRODUCTION_signal	GO_LYMPHOCYTE_COSTIMULATION_signal	GO_INTERFERON_GAMMA_MEDIATED_SIGNALING_PATHWAY_signal	GO_RESPONSE_TO_INTERFERON_GAMMA_signal	GO_CELLULAR_RESPONSE_TO_INTERFERON_GAMMA_signal	GO_ACTIVATION_OF_IMMUNE_RESPONSE_signal	GO_IMMUNE_RESPONSE_REGULATING_CELL_SURFACE_RECEPTOR_SIGNALING_PATHWAY_signal	GO_FC_RECEPTOR_SIGNALING_PATHWAY_signal	GO_PHAGOCYTOSIS_signal	GO_FC_GAMMA_RECEPTOR_SIGNALING_PATHWAY_signal	GO_INFLAMMATORY_RESPONSE_TO_ANTIGENIC_STIMULUS_signal	GO_DETECTION_OF_BIOTIC_STIMULUS_signal
ST13	1	0	0	0	0	0.078571	0	0	0	0	0	0	0	0	0	0	0	0	0	0	0	0	0	0	0	0	0	0	0
HSPA1A	1	0	0	0	0	0.067764	0	0	0	0	0	0	0	0	0	0	0	0	0	0	0	0	0	0	0	0	0	0	0
BAG1	1	0	0	0	0	0.065991	0	0	0	0	0	0	0	0	0	0	0	0	0	0	0	0	0	0	0	0	0	0	0
DNAJC7	1	0	0	0	0	0.105033	0	0	0	0	0	0	0	0	0	0	0	0	0	0	0	0	0	0	0	0	0	0	0
DNAJB1	1	0	0	0	0	0.110423	0	0	0	0	0	0	0	0	0	0	0	0	0	0	0	0	0	0	0	0	0	0	0
DNAJA4	1	0	0	0	0	0.097311	0	0	0	0	0	0	0	0	0	0	0	0	0	0	0	0	0	0	0	0	0	0	0
DNAJA2	1	0	0	0	0	0.086503	0	0	0	0	0	0	0	0	0	0	0	0	0	0	0	0	0	0	0	0	0	0	0
HSPA6	1	0	0	0	0	0.061583	0	0	0	0	0	0	0	0	0	0	0	0	0	0	0	0	0	0	0	0	0	0	0
PAWR	1	0	0	0.042829	0	0	0	0	0	0	0	0	0	0	0	0	0	0	0	0	0	0	0	0	0	0	0	0	0
FKBP1A	3	0	0	0.079698	0.079698	0.079698	0	0	0	0	0	0	0	0	0	0	0	0	0	0	0	0	0	0	0	0	0	0	0
FKBP1B	3	0	0	0.156333	0.156333	0.156333	0	0	0	0	0	0	0	0	0	0	0	0	0	0	0	0	0	0	0	0	0	0	0
GSTM2	2	0	0	0.099748	0.099748	0	0	0	0	0	0	0	0	0	0	0	0	0	0	0	0	0	0	0	0	0	0	0	0
SRI	2	0	0	0.061497	0.061497	0	0	0	0	0	0	0	0	0	0	0	0	0	0	0	0	0	0	0	0	0	0	0	0
PLN	2	0	0	0.05906	0.05906	0	0	0	0	0	0	0	0	0	0	0	0	0	0	0	0	0	0	0	0	0	0	0	0
TRIM27	2	0	0	0.048789	0.048789	0	0	0	0	0	0	0	0	0	0	0	0	0	0	0	0	0	0	0	0	0	0	0	0
NTSR1	2	0	0	0.152664	0.152664	0	0	0	0	0	0	0	0	0	0	0	0	0	0	0	0	0	0	0	0	0	0	0	0
CLIC2	2	0	0	0.052496	0.052496	0	0	0	0	0	0	0	0	0	0	0	0	0	0	0	0	0	0	0	0	0	0	0	0
SLC30A1	2	0	0	0.062731	0.062731	0	0	0	0	0	0	0	0	0	0	0	0	0	0	0	0	0	0	0	0	0	0	0	0
PTGER3	2	0	0	0	0.108632	0	0	0	0	0	0	0.108632	0	0	0	0	0	0	0	0	0	0	0	0	0	0	0	0	0
NEDD4L	1	0	0	0	0.062443	0	0	0	0	0	0	0	0	0	0	0	0	0	0	0	0	0	0	0	0	0	0	0	0
OAZ1	1	0	0	0	0.050355	0	0	0	0	0	0	0	0	0	0	0	0	0	0	0	0	0	0	0	0	0	0	0	0
OAZ2	1	0	0	0	0.084519	0	0	0	0	0	0	0	0	0	0	0	0	0	0	0	0	0	0	0	0	0	0	0	0
OAZ3	1	0	0	0	0.078077	0	0	0	0	0	0	0	0	0	0	0	0	0	0	0	0	0	0	0	0	0	0	0	0
CRBN	1	0	0	0	0.060376	0	0	0	0	0	0	0	0	0	0	0	0	0	0	0	0	0	0	0	0	0	0	0	0
STK39	1	0	0	0	0.105426	0	0	0	0	0	0	0	0	0	0	0	0	0	0	0	0	0	0	0	0	0	0	0	0
KCNAB1	1	0	0	0	0.097058	0	0	0	0	0	0	0	0	0	0	0	0	0	0	0	0	0	0	0	0	0	0	0	0
ANK3	1	0	0	0	0.099973	0	0	0	0	0	0	0	0	0	0	0	0	0	0	0	0	0	0	0	0	0	0	0	0
KCNQ1	1	0	0	0	0.091624	0	0	0	0	0	0	0	0	0	0	0	0	0	0	0	0	0	0	0	0	0	0	0	0
CAB39	1	0	0	0	0.078689	0	0	0	0	0	0	0	0	0	0	0	0	0	0	0	0	0	0	0	0	0	0	0	0
NEDD4	1	0	0	0	0.046102	0	0	0	0	0	0	0	0	0	0	0	0	0	0	0	0	0	0	0	0	0	0	0	0
PPIF	1	0	0	0	0.060497	0	0	0	0	0	0	0	0	0	0	0	0	0	0	0	0	0	0	0	0	0	0	0	0
GRK6	1	0	0	0	0.051783	0	0	0	0	0	0	0	0	0	0	0	0	0	0	0	0	0	0	0	0	0	0	0	0
YWHAQ	1	0	0	0	0.095168	0	0	0	0	0	0	0	0	0	0	0	0	0	0	0	0	0	0	0	0	0	0	0	0
CEP112	1	0	0	0	0	0	0	0.088615	0	0	0	0	0	0	0	0	0	0	0	0	0	0	0	0	0	0	0	0	0
CDK5	1	0	0	0	0	0	0	0.05383	0	0	0	0	0	0	0	0	0	0	0	0	0	0	0	0	0	0	0	0	0
NLGN1	1	0	0	0	0	0	0	0.086911	0	0	0	0	0	0	0	0	0	0	0	0	0	0	0	0	0	0	0	0	0
RELN	1	0	0	0	0	0	0	0.111013	0	0	0	0	0	0	0	0	0	0	0	0	0	0	0	0	0	0	0	0	0
DLG1	1	0	0	0	0	0	0	0.053144	0	0	0	0	0	0	0	0	0	0	0	0	0	0	0	0	0	0	0	0	0
DLG2	1	0	0	0	0	0	0	0.099954	0	0	0	0	0	0	0	0	0	0	0	0	0	0	0	0	0	0	0	0	0
DLG4	1	0	0	0	0	0	0	0.049228	0	0	0	0	0	0	0	0	0	0	0	0	0	0	0	0	0	0	0	0	0
LRRTM1	1	0	0	0	0	0	0	0.114309	0	0	0	0	0	0	0	0	0	0	0	0	0	0	0	0	0	0	0	0	0
NPHS1	1	0	0	0	0	0	0	0.091749	0	0	0	0	0	0	0	0	0	0	0	0	0	0	0	0	0	0	0	0	0
NOTCH1	3	0	0	0	0	0	0	0	0	0	0	0	0	0	0.072569	0.072569	0	0	0	0	0	0	0	0	0	0	0	0.072569	0
AHCY	1	0	0	0	0	0	0	0	0	0	0	0	0	0	0	0	0	0	0	0	0	0	0	0	0	0	0	0.082016	0
RASGRP1	1	0	0	0	0	0	0	0	0	0	0	0	0	0	0	0	0	0	0	0	0	0	0	0	0	0	0	0.088546	0
FGF2	3	0	0	0	0	0	0	0	0	0	0	0.088448	0	0	0.088448	0.088448	0	0	0	0	0	0	0	0	0	0	0	0	0
APOE	2	0	0	0	0	0	0	0	0	0	0	0.07595	0	0	0	0.07595	0	0	0	0	0	0	0	0	0	0	0	0	0
STARD13	1	0	0	0	0	0	0	0	0	0	0	0	0	0	0	0.035748	0	0	0	0	0	0	0	0	0	0	0	0	0
NR2F2	1	0	0	0	0	0	0	0	0	0	0	0	0	0	0	0.163773	0	0	0	0	0	0	0	0	0	0	0	0	0
SYNJ2BP	1	0	0	0	0	0	0	0	0	0	0	0	0	0	0	0.083486	0	0	0	0	0	0	0	0	0	0	0	0	0
VASH1	1	0	0	0	0	0	0	0	0	0	0	0	0	0	0	0.046176	0	0	0	0	0	0	0	0	0	0	0	0	0
MAP2K5	1	0	0	0	0	0	0	0	0	0	0	0	0	0	0	0.041704	0	0	0	0	0	0	0	0	0	0	0	0	0
PTPN23	1	0	0	0	0	0	0	0	0	0	0	0	0	0	0	0.068632	0	0	0	0	0	0	0	0	0	0	0	0	0
HDAC5	1	0	0	0	0	0	0	0	0	0	0	0	0	0	0	0.068987	0	0	0	0	0	0	0	0	0	0	0	0	0
ANGPT2	1	0	0	0	0	0	0	0	0	0	0	0	0	0	0	0.064836	0	0	0	0	0	0	0	0	0	0	0	0	0
CSNK2B	1	0	0	0	0	0	0	0	0	0	0	0	0	0	0	0.038511	0	0	0	0	0	0	0	0	0	0	0	0	0
PTPRR	1	0	0	0	0	0	0	0	0	0	0	0	0	0	0	0.128251	0	0	0	0	0	0	0	0	0	0	0	0	0
PTPRM	1	0	0	0	0	0	0	0	0	0	0	0	0	0	0	0.034227	0	0	0	0	0	0	0	0	0	0	0	0	0
PTPRG	1	0	0	0	0	0	0	0	0	0	0	0	0	0	0	0.070844	0	0	0	0	0	0	0	0	0	0	0	0	0
STRAP	1	0	0	0	0	0	0	0	0	0	0	0	0	0	0	0.066264	0	0	0	0	0	0	0	0	0	0	0	0	0
CD63	1	0	0	0	0	0	0	0	0	0	0	0	0	0	0	0.071428	0	0	0	0	0	0	0	0	0	0	0	0	0
SP100	1	0	0	0	0	0	0	0	0	0	0	0	0	0	0	0.039323	0	0	0	0	0	0	0	0	0	0	0	0	0
DCN	1	0	0	0	0	0	0	0	0	0	0	0	0	0	0	0.18629	0	0	0	0	0	0	0	0	0	0	0	0	0
MMRN2	1	0	0	0	0	0	0	0	0	0	0	0	0	0	0	0.05165	0	0	0	0	0	0	0	0	0	0	0	0	0
PDGFRA	2	0	0	0	0	0	0.117079	0	0	0	0	0.117079	0	0	0	0	0	0	0	0	0	0	0	0	0	0	0	0	0
CXADR	1	0	0	0	0	0	0.086238	0	0	0	0	0	0	0	0	0	0	0	0	0	0	0	0	0	0	0	0	0	0
MYL9	1	0	0	0	0	0	0.059602	0	0	0	0	0	0	0	0	0	0	0	0	0	0	0	0	0	0	0	0	0	0
FLNA	1	0	0	0	0	0	0.069956	0	0	0	0	0	0	0	0	0	0	0	0	0	0	0	0	0	0	0	0	0	0
P2RY12	1	0	0	0	0	0	0.06283	0	0	0	0	0	0	0	0	0	0	0	0	0	0	0	0	0	0	0	0	0	0
METAP1	1	0	0	0	0	0	0.077764	0	0	0	0	0	0	0	0	0	0	0	0	0	0	0	0	0	0	0	0	0	0
TLN1	1	0	0	0	0	0	0.093465	0	0	0	0	0	0	0	0	0	0	0	0	0	0	0	0	0	0	0	0	0	0
STXBP3	1	0	0	0	0	0	0.123957	0	0	0	0	0	0	0	0	0	0	0	0	0	0	0	0	0	0	0	0	0	0
SLC7A11	1	0	0	0	0	0	0.091462	0	0	0	0	0	0	0	0	0	0	0	0	0	0	0	0	0	0	0	0	0	0
CLIC1	1	0	0	0	0	0	0.060257	0	0	0	0	0	0	0	0	0	0	0	0	0	0	0	0	0	0	0	0	0	0
RAP2B	1	0	0	0	0	0	0.094801	0	0	0	0	0	0	0	0	0	0	0	0	0	0	0	0	0	0	0	0	0	0
CTNNA3	1	0	0	0	0	0	0.061813	0	0	0	0	0	0	0	0	0	0	0	0	0	0	0	0	0	0	0	0	0	0
MEGF11	1	0	0	0	0	0	0.096254	0	0	0	0	0	0	0	0	0	0	0	0	0	0	0	0	0	0	0	0	0	0
HSPB1	1	0	0	0	0	0	0.075434	0	0	0	0	0	0	0	0	0	0	0	0	0	0	0	0	0	0	0	0	0	0
PFN2	3	0	0	0	0	0	0	0	0	0	0	0	0.077576	0.077576	0	0.077576	0	0	0	0	0	0	0	0	0	0	0	0	0
RHOA	3	0	0	0	0	0	0	0	0	0	0	0	0.066098	0.066098	0	0.066098	0	0	0	0	0	0	0	0	0	0	0	0	0
ITGB1BP1	4	0	0	0	0	0	0	0	0	0	0	0	0.064298	0.064298	0.064298	0.064298	0	0	0	0	0	0	0	0	0	0	0	0	0
S100A10	3	0	0.208326	0	0	0	0	0	0	0	0	0	0.208326	0.208326	0	0	0	0	0	0	0	0	0	0	0	0	0	0	0
CTGF	2	0	0	0	0	0	0	0	0	0	0	0	0.155125	0.155125	0	0	0	0	0	0	0	0	0	0	0	0	0	0	0
SWAP70	2	0	0	0	0	0	0	0	0	0	0	0	0.084896	0.084896	0	0	0	0	0	0	0	0	0	0	0	0	0	0	0
TPM1	2	0	0	0	0	0	0	0	0	0	0	0	0.062078	0.062078	0	0	0	0	0	0	0	0	0	0	0	0	0	0	0
BAG4	2	0	0	0	0	0	0	0	0	0	0	0	0.061001	0.061001	0	0	0	0	0	0	0	0	0	0	0	0	0	0	0
PPM1E	2	0	0	0	0	0	0	0	0	0	0	0	0.09064	0.09064	0	0	0	0	0	0	0	0	0	0	0	0	0	0	0
LPAR1	2	0	0	0	0	0	0	0	0	0	0	0	0.068945	0.068945	0	0	0	0	0	0	0	0	0	0	0	0	0	0	0
FHOD1	2	0	0	0	0	0	0	0	0	0	0	0	0.087112	0.087112	0	0	0	0	0	0	0	0	0	0	0	0	0	0	0
AMOT	2	0	0	0	0	0	0	0	0	0	0	0	0.066653	0.066653	0	0	0	0	0	0	0	0	0	0	0	0	0	0	0
TAC1	2	0	0	0	0	0	0	0	0	0	0	0	0.081906	0.081906	0	0	0	0	0	0	0	0	0	0	0	0	0	0	0
WNT11	2	0	0	0	0	0	0	0	0	0	0	0	0.091409	0.091409	0	0	0	0	0	0	0	0	0	0	0	0	0	0	0
SHANK1	2	0	0	0	0	0	0	0.074543	0	0	0	0	0	0.074543	0	0	0	0	0	0	0	0	0	0	0	0	0	0	0
ARHGAP6	1	0	0	0	0	0	0	0	0	0	0	0	0	0.08945	0	0	0	0	0	0	0	0	0	0	0	0	0	0	0
TMEFF2	1	0	0	0	0	0	0	0	0	0	0	0	0	0.104298	0	0	0	0	0	0	0	0	0	0	0	0	0	0	0
PTGER4	1	0	0	0	0	0	0	0	0	0	0	0	0	0.080944	0	0	0	0	0	0	0	0	0	0	0	0	0	0	0
DLC1	1	0	0	0	0	0	0	0	0	0	0	0	0	0.084018	0	0	0	0	0	0	0	0	0	0	0	0	0	0	0
S1PR1	1	0	0	0	0	0	0	0	0	0	0	0	0	0.068399	0	0	0	0	0	0	0	0	0	0	0	0	0	0	0
ANXA2	2	0	0.122202	0	0	0	0	0	0	0	0	0.122202	0	0	0	0	0	0	0	0	0	0	0	0	0	0	0	0	0
GJA1	1	0	0	0	0	0	0	0	0	0	0	0.065804	0	0	0	0	0	0	0	0	0	0	0	0	0	0	0	0	0
F12	1	0	0	0	0	0	0	0	0	0	0	0.096234	0	0	0	0	0	0	0	0	0	0	0	0	0	0	0	0	0
PROS1	1	0	0	0	0	0	0	0	0	0	0	0.111599	0	0	0	0	0	0	0	0	0	0	0	0	0	0	0	0	0
PRKG1	1	0	0	0	0	0	0	0	0	0	0	0.118737	0	0	0	0	0	0	0	0	0	0	0	0	0	0	0	0	0
CD109	1	0	0	0	0	0	0	0	0	0	0	0.059085	0	0	0	0	0	0	0	0	0	0	0	0	0	0	0	0	0
WFDC1	1	0	0	0	0	0	0	0	0	0	0	0.094311	0	0	0	0	0	0	0	0	0	0	0	0	0	0	0	0	0
EDN1	1	0	0	0	0	0	0	0	0	0	0	0.056638	0	0	0	0	0	0	0	0	0	0	0	0	0	0	0	0	0
CASK	1	0	0	0	0	0	0	0	0	0	0	0.120696	0	0	0	0	0	0	0	0	0	0	0	0	0	0	0	0	0
ADRB2	1	0	0	0	0	0	0	0	0	0	0	0.056343	0	0	0	0	0	0	0	0	0	0	0	0	0	0	0	0	0
WNT4	3	0	0	0	0	0	0	0	0	0	0	0.168384	0.168384	0.168384	0	0	0	0	0	0	0	0	0	0	0	0	0	0	0
SMAD3	4	0	0	0	0	0	0	0	0	0	0.068982	0.068982	0.068982	0.068982	0	0	0	0	0	0	0	0	0	0	0	0	0	0	0
CLASP1	2	0	0	0	0	0	0	0	0	0	0	0.060757	0	0.060757	0	0	0	0	0	0	0	0	0	0	0	0	0	0	0
CLASP2	2	0	0	0	0	0	0	0	0	0	0	0.105173	0	0.105173	0	0	0	0	0	0	0	0	0	0	0	0	0	0	0
SULF2	2	0	0	0	0	0	0	0	0	0.155322	0.155322	0	0	0	0	0	0	0	0	0	0	0	0	0	0	0	0	0	0
PRKCG	1	0	0	0	0	0	0	0	0	0.150211	0	0	0	0	0	0	0	0	0	0	0	0	0	0	0	0	0	0	0
GABRB3	1	0	0	0	0	0	0	0	0	0.105745	0	0	0	0	0	0	0	0	0	0	0	0	0	0	0	0	0	0	0
GABRA5	1	0	0	0	0	0	0	0	0	0.18229	0	0	0	0	0	0	0	0	0	0	0	0	0	0	0	0	0	0	0
SULF1	1	0	0	0	0	0	0	0	0	0.1422	0	0	0	0	0	0	0	0	0	0	0	0	0	0	0	0	0	0	0
SLITRK6	1	0	0	0	0	0	0	0	0	0.127674	0	0	0	0	0	0	0	0	0	0	0	0	0	0	0	0	0	0	0
SEMA5A	2	0	0	0	0	0	0	0	0	0	0.126967	0	0	0	0.126967	0	0	0	0	0	0	0	0	0	0	0	0	0	0
FZD1	1	0	0	0	0	0	0	0	0	0	0.182363	0	0	0	0	0	0	0	0	0	0	0	0	0	0	0	0	0	0
FZD7	1	0	0	0	0	0	0	0	0	0	0.199759	0	0	0	0	0	0	0	0	0	0	0	0	0	0	0	0	0	0
EMD	1	0	0	0	0	0	0	0	0	0	0.047779	0	0	0	0	0	0	0	0	0	0	0	0	0	0	0	0	0	0
KANK1	1	0	0	0	0	0	0	0	0	0	0.060421	0	0	0	0	0	0	0	0	0	0	0	0	0	0	0	0	0	0
SFRP2	1	0	0	0	0	0	0	0	0	0	0.073369	0	0	0	0	0	0	0	0	0	0	0	0	0	0	0	0	0	0
WWTR1	1	0	0	0	0	0	0	0	0	0	0.10639	0	0	0	0	0	0	0	0	0	0	0	0	0	0	0	0	0	0
GNAQ	1	0	0	0	0	0	0	0	0	0	0.05692	0	0	0	0	0	0	0	0	0	0	0	0	0	0	0	0	0	0
DACT3	1	0	0	0	0	0	0	0	0	0	0.068071	0	0	0	0	0	0	0	0	0	0	0	0	0	0	0	0	0	0
DACT1	1	0	0	0	0	0	0	0	0	0	0.041694	0	0	0	0	0	0	0	0	0	0	0	0	0	0	0	0	0	0
RGS19	1	0	0	0	0	0	0	0	0	0	0.078638	0	0	0	0	0	0	0	0	0	0	0	0	0	0	0	0	0	0
RGS20	1	0	0	0	0	0	0	0	0	0	0.045317	0	0	0	0	0	0	0	0	0	0	0	0	0	0	0	0	0	0
NRP1	3	0	0	0	0	0	0	0	0.12471	0.12471	0	0	0	0	0.12471	0	0	0	0	0	0	0	0	0	0	0	0	0	0
ROBO1	2	0	0	0	0	0	0	0	0.076327	0	0	0	0	0	0.076327	0	0	0	0	0	0	0	0	0	0	0	0	0	0
TSKU	1	0	0	0	0	0	0	0	0.097638	0	0	0	0	0	0	0	0	0	0	0	0	0	0	0	0	0	0	0	0
ATF5	1	0	0	0	0	0	0	0	0.08549	0	0	0	0	0	0	0	0	0	0	0	0	0	0	0	0	0	0	0	0
GABRB1	1	0	0	0	0	0	0	0	0.135692	0	0	0	0	0	0	0	0	0	0	0	0	0	0	0	0	0	0	0	0
BTG2	1	0	0	0	0	0	0	0	0.071446	0	0	0	0	0	0	0	0	0	0	0	0	0	0	0	0	0	0	0	0
TCTN1	1	0	0	0	0	0	0	0	0.079539	0	0	0	0	0	0	0	0	0	0	0	0	0	0	0	0	0	0	0	0
MAP2	1	0	0	0	0	0	0	0	0.154654	0	0	0	0	0	0	0	0	0	0	0	0	0	0	0	0	0	0	0	0
ROBO2	1	0	0	0	0	0	0	0	0.078109	0	0	0	0	0	0	0	0	0	0	0	0	0	0	0	0	0	0	0	0
FEZF2	1	0	0	0	0	0	0	0	0.142077	0	0	0	0	0	0	0	0	0	0	0	0	0	0	0	0	0	0	0	0
NPY	1	0	0	0	0	0	0	0	0.156548	0	0	0	0	0	0	0	0	0	0	0	0	0	0	0	0	0	0	0	0
NR4A2	1	0	0	0	0	0	0	0	0.099831	0	0	0	0	0	0	0	0	0	0	0	0	0	0	0	0	0	0	0	0
FGFR1	1	0	0	0	0	0	0	0	0.085978	0	0	0	0	0	0	0	0	0	0	0	0	0	0	0	0	0	0	0	0
DCC	1	0	0	0	0	0	0	0	0.117387	0	0	0	0	0	0	0	0	0	0	0	0	0	0	0	0	0	0	0	0
CDH11	1	0	0	0	0	0	0	0	0.144106	0	0	0	0	0	0	0	0	0	0	0	0	0	0	0	0	0	0	0	0
SLIT1	1	0	0	0	0	0	0	0	0.107373	0	0	0	0	0	0	0	0	0	0	0	0	0	0	0	0	0	0	0	0
SLIT3	1	0	0	0	0	0	0	0	0.102415	0	0	0	0	0	0	0	0	0	0	0	0	0	0	0	0	0	0	0	0
EFNB2	2	0	0	0	0	0	0	0	0	0	0	0	0	0	0.051093	0	0	0	0.051093	0	0	0	0	0	0	0	0	0	0
MAPKAP1	1	0	0	0	0	0	0	0	0	0	0	0	0	0	0	0	0	0	0.137122	0	0	0	0	0	0	0	0	0	0
TNFRSF14	1	0	0	0	0	0	0	0	0	0	0	0	0	0	0	0	0	0	0.085603	0	0	0	0	0	0	0	0	0	0
PTPN11	1	0	0	0	0	0	0	0	0	0	0	0	0	0	0	0	0	0	0.069277	0	0	0	0	0	0	0	0	0	0
EFNB3	1	0	0	0	0	0	0	0	0	0	0	0	0	0	0	0	0	0	0.105985	0	0	0	0	0	0	0	0	0	0
PRR5	1	0	0	0	0	0	0	0	0	0	0	0	0	0	0	0	0	0	0.167173	0	0	0	0	0	0	0	0	0	0
CCBE1	1	0	0	0	0	0	0	0	0	0	0	0	0	0	0.111989	0	0	0	0	0	0	0	0	0	0	0	0	0	0
RSPO3	1	0	0	0	0	0	0	0	0	0	0	0	0	0	0.150225	0	0	0	0	0	0	0	0	0	0	0	0	0	0
SEMA3E	1	0	0	0	0	0	0	0	0	0	0	0	0	0	0.085467	0	0	0	0	0	0	0	0	0	0	0	0	0	0
ANGPT1	1	0	0	0	0	0	0	0	0	0	0	0	0	0	0.078838	0	0	0	0	0	0	0	0	0	0	0	0	0	0
KDR	1	0	0	0	0	0	0	0	0	0	0	0	0	0	0.118185	0	0	0	0	0	0	0	0	0	0	0	0	0	0
PARVA	1	0	0	0	0	0	0	0	0	0	0	0	0	0	0.054288	0	0	0	0	0	0	0	0	0	0	0	0	0	0
CDH13	1	0	0	0	0	0	0	0	0	0	0	0	0	0	0.055701	0	0	0	0	0	0	0	0	0	0	0	0	0	0
TEK	1	0	0	0	0	0	0	0	0	0	0	0	0	0	0.136979	0	0	0	0	0	0	0	0	0	0	0	0	0	0
TLR3	4	0	0	0	0	0	0	0	0	0	0	0	0	0	0	0	0	0.077191	0	0	0.077191	0.077191	0.077191	0	0	0	0	0	0
WNT5A	4	0	0	0	0	0	0	0	0.176106	0	0	0	0	0	0	0	0	0.176106	0	0	0.176106	0.176106	0	0	0	0	0	0	0
AIF1	3	0	0	0	0	0	0	0	0	0	0	0	0	0	0	0	0	0	0	0	0.073388	0.073388	0	0	0	0.073388	0	0	0
CCL19	3	0	0	0	0	0	0	0	0	0	0	0	0	0	0	0	0	0	0.08916	0	0.08916	0.08916	0	0	0	0	0	0	0
CCL2	2	0	0	0	0	0	0	0	0	0	0	0	0	0	0	0	0	0	0	0	0.086082	0.086082	0	0	0	0	0	0	0
ASS1	2	0	0	0	0	0	0	0	0	0	0	0	0	0	0	0	0	0	0	0	0.126542	0.126542	0	0	0	0	0	0	0
AQP4	2	0	0	0	0	0	0	0	0	0	0	0	0	0	0	0	0	0	0	0	0.116659	0.116659	0	0	0	0	0	0	0
SYNCRIP	2	0	0	0	0	0	0	0	0	0	0	0	0	0	0	0	0	0	0	0	0.080859	0.080859	0	0	0	0	0	0	0
CD58	2	0	0	0	0	0	0	0	0	0	0	0	0	0	0	0	0	0	0	0	0.10861	0.10861	0	0	0	0	0	0	0
IFITM3	1	0	0	0	0	0	0	0	0	0	0	0	0	0	0	0	0	0	0	0	0.095392	0	0	0	0	0	0	0	0
IFITM1	1	0	0	0	0	0	0	0	0	0	0	0	0	0	0	0	0	0	0	0	0.07358	0	0	0	0	0	0	0	0
IFITM2	1	0	0	0	0	0	0	0	0	0	0	0	0	0	0	0	0	0	0	0	0.110291	0	0	0	0	0	0	0	0
KYNU	1	0	0	0	0	0	0	0	0	0	0	0	0	0	0	0	0	0	0	0	0.106726	0	0	0	0	0	0	0	0
PRKCD	9	0	0	0	0	0	0	0	0	0	0	0.102133	0	0	0	0	0	0	0	0.102133	0.102133	0.102133	0.102133	0.102133	0.102133	0.102133	0.102133	0	0
HCK	8	0	0	0	0	0	0	0	0	0	0	0	0	0	0	0	0	0	0	0.085236	0.085236	0.085236	0.085236	0.085236	0.085236	0.085236	0.085236	0	0
HLA-DRB5	8	0	0	0	0	0	0	0	0	0	0	0	0	0	0	0	0	0	0.121916	0.121916	0.121916	0.121916	0.121916	0.121916	0	0	0	0.121916	0.121916
HLA-DRB4	8	0	0	0	0	0	0	0	0	0	0	0	0	0	0	0	0	0	0.092345	0.092345	0.092345	0.092345	0.092345	0.092345	0	0	0	0.092345	0.092345
HLA-DRB3	8	0	0	0	0	0	0	0	0	0	0	0	0	0	0	0	0	0	0.077858	0.077858	0.077858	0.077858	0.077858	0.077858	0	0	0	0.077858	0.077858
HLA-DRB1	8	0	0	0	0	0	0	0	0	0	0	0	0	0	0	0	0	0	0.093495	0.093495	0.093495	0.093495	0.093495	0.093495	0	0	0	0.093495	0.093495
HLA-DPA1	6	0	0	0	0	0	0	0	0	0	0	0	0	0	0	0	0	0	0.141705	0.141705	0.141705	0.141705	0.141705	0.141705	0	0	0	0	0
HLA-DQB1	6	0	0	0	0	0	0	0	0	0	0	0	0	0	0	0	0	0	0.065886	0.065886	0.065886	0.065886	0.065886	0.065886	0	0	0	0	0
HLA-DPB1	6	0	0	0	0	0	0	0	0	0	0	0	0	0	0	0	0	0	0.089566	0.089566	0.089566	0.089566	0.089566	0.089566	0	0	0	0	0
HLA-DRA	6	0	0	0	0	0	0	0	0	0	0	0	0	0	0	0	0	0	0.147508	0.147508	0.147508	0.147508	0.147508	0.147508	0	0	0	0	0
FCGR1B	5	0	0	0	0	0	0	0	0	0	0	0	0	0	0	0	0	0	0	0.106201	0.106201	0.106201	0	0.106201	0.106201	0	0	0	0
HLA-G	4	0	0	0	0	0	0	0	0	0	0	0	0	0	0	0	0	0	0	0.071145	0.071145	0.071145	0	0.071145	0	0	0	0	0
CAMK2D	4	0	0	0	0.109869	0	0	0	0	0	0	0	0	0	0	0	0	0	0	0.109869	0.109869	0.109869	0	0	0	0	0	0	0
IRF7	4	0	0	0	0	0	0	0	0	0	0	0	0	0	0	0	0	0	0	0.093744	0.093744	0.093744	0.093744	0	0	0	0	0	0
JAK1	3	0	0	0	0	0	0	0	0	0	0	0	0	0	0	0	0	0	0	0.125265	0.125265	0.125265	0	0	0	0	0	0	0
IFNGR2	3	0	0	0	0	0	0	0	0	0	0	0	0	0	0	0	0	0	0	0.089093	0.089093	0.089093	0	0	0	0	0	0	0
STAT1	3	0	0	0	0	0	0	0	0	0	0	0	0	0	0	0	0	0	0	0.071362	0.071362	0.071362	0	0	0	0	0	0	0
IFI30	3	0	0	0	0	0	0	0	0	0	0	0	0	0	0	0	0	0	0	0.065671	0.065671	0.065671	0	0	0	0	0	0	0
MT2A	3	0	0	0	0	0	0	0	0	0	0	0	0	0	0	0	0	0	0	0.110258	0.110258	0.110258	0	0	0	0	0	0	0
TRIM22	3	0	0	0	0	0	0	0	0	0	0	0	0	0	0	0	0	0	0	0.11289	0.11289	0.11289	0	0	0	0	0	0	0
HLA-H	3	0	0	0	0	0	0	0	0	0	0	0	0	0	0	0	0	0	0	0.059743	0.059743	0.059743	0	0	0	0	0	0	0
HLA-C	3	0	0	0	0	0	0	0	0	0	0	0	0	0	0	0	0	0	0	0.08388	0.08388	0.08388	0	0	0	0	0	0	0
HLA-E	3	0	0	0	0	0	0	0	0	0	0	0	0	0	0	0	0	0	0	0.06835	0.06835	0.06835	0	0	0	0	0	0	0
MID1	3	0	0	0	0	0	0	0	0	0	0	0	0	0	0	0	0	0	0	0.064849	0.064849	0.064849	0	0	0	0	0	0	0
GBP2	3	0	0	0	0	0	0	0	0	0	0	0	0	0	0	0	0	0	0	0.061891	0.061891	0.061891	0	0	0	0	0	0	0
CALM1	4	0	0	0.068076	0.068076	0	0	0	0	0	0	0	0	0	0	0	0	0	0	0	0	0	0	0.068076	0.068076	0	0	0	0
CALM2	4	0	0	0.105003	0.105003	0	0	0	0	0	0	0	0	0	0	0	0	0	0	0	0	0	0	0.105003	0.105003	0	0	0	0
UBA52	4	0.103991	0	0	0	0	0	0	0	0	0	0	0	0	0	0	0	0	0	0	0	0	0.103991	0.103991	0.103991	0	0	0	0
RPS27A	3	0.049957	0	0	0	0	0	0	0	0	0	0	0	0	0	0	0	0	0	0	0	0	0	0.049957	0.049957	0	0	0	0
PSMD5	3	0	0	0	0	0	0	0	0	0	0	0	0	0	0	0	0	0	0	0	0	0	0.134918	0.134918	0.134918	0	0	0	0
PSME3	3	0	0	0	0	0	0	0	0	0	0	0	0	0	0	0	0	0	0	0	0	0	0.074645	0.074645	0.074645	0	0	0	0
PSMA3	3	0	0	0	0	0	0	0	0	0	0	0	0	0	0	0	0	0	0	0	0	0	0.088073	0.088073	0.088073	0	0	0	0
NRAS	3	0	0	0	0	0	0	0	0	0	0	0	0	0	0	0	0	0	0	0	0	0	0.121187	0.121187	0.121187	0	0	0	0
PSMB4	3	0	0	0	0	0	0	0	0	0	0	0	0	0	0	0	0	0	0	0	0	0	0.071101	0.071101	0.071101	0	0	0	0
PSMB2	3	0	0	0	0	0	0	0	0	0	0	0	0	0	0	0	0	0	0	0	0	0	0.06812	0.06812	0.06812	0	0	0	0
PSMC5	3	0	0	0	0	0	0	0	0	0	0	0	0	0	0	0	0	0	0	0	0	0	0.072709	0.072709	0.072709	0	0	0	0
PSMC6	3	0	0	0	0	0	0	0	0	0	0	0	0	0	0	0	0	0	0	0	0	0	0.064468	0.064468	0.064468	0	0	0	0
PSMC1	3	0	0	0	0	0	0	0	0	0	0	0	0	0	0	0	0	0	0	0	0	0	0.065342	0.065342	0.065342	0	0	0	0
UBE2D2	3	0	0	0	0	0	0	0	0	0	0	0	0	0	0	0	0	0	0	0	0	0	0.086814	0.086814	0.086814	0	0	0	0
CHUK	3	0	0	0	0	0	0	0	0	0	0	0	0	0	0	0	0	0	0	0	0	0	0.058049	0.058049	0.058049	0	0	0	0
BTRC	3	0	0	0	0	0	0	0	0	0	0	0	0	0	0	0	0	0	0	0	0	0	0.073392	0.073392	0.073392	0	0	0	0
HRAS	3	0	0	0	0	0	0	0	0	0	0	0	0	0	0	0	0	0	0	0	0	0	0.099371	0.099371	0.099371	0	0	0	0
LAT2	3	0	0	0	0	0	0	0	0	0	0	0	0	0	0	0	0	0	0	0	0	0	0.07015	0.07015	0.07015	0	0	0	0
FBXW11	3	0	0	0	0	0	0	0	0	0	0	0	0	0	0	0	0	0	0	0	0	0	0.066002	0.066002	0.066002	0	0	0	0
PSMD14	3	0	0	0	0	0	0	0	0	0	0	0	0	0	0	0	0	0	0	0	0	0	0.059614	0.059614	0.059614	0	0	0	0
PSMD13	3	0	0	0	0	0	0	0	0	0	0	0	0	0	0	0	0	0	0	0	0	0	0.091552	0.091552	0.091552	0	0	0	0
NR4A3	3	0	0	0	0	0	0	0	0	0	0	0	0	0	0	0	0	0	0	0	0	0	0.123565	0.123565	0.123565	0	0	0	0
UBE2N	3	0	0	0	0	0	0	0	0	0	0	0	0	0	0	0	0	0	0	0	0	0	0.107915	0.107915	0.107915	0	0	0	0
TAB2	3	0	0	0	0	0	0	0	0	0	0	0	0	0	0	0	0	0	0	0	0	0	0.063131	0.063131	0.063131	0	0	0	0
FCGRT	3	0	0	0	0	0	0	0	0	0	0	0	0	0	0	0	0	0	0	0	0	0	0	0.143788	0.143788	0	0.143788	0	0
PSMD1	2	0	0	0	0	0	0	0	0	0	0	0	0	0	0	0	0	0	0	0	0	0	0	0.050463	0.050463	0	0	0	0
JUN	2	0	0	0	0	0	0	0	0	0	0	0	0	0	0	0	0	0	0	0	0	0	0	0.096228	0.096228	0	0	0	0
FOS	2	0	0	0	0	0	0	0	0	0	0	0	0	0	0	0	0	0	0	0	0	0	0	0.065319	0.065319	0	0	0	0
PSMB3	2	0	0	0	0	0	0	0	0	0	0	0	0	0	0	0	0	0	0	0	0	0	0	0.04956	0.04956	0	0	0	0
MAP2K4	2	0	0	0	0	0	0	0	0	0	0	0	0	0	0	0	0	0	0	0	0	0	0	0.073843	0.073843	0	0	0	0
SHC1	2	0	0	0	0	0	0	0	0	0	0	0	0	0	0	0	0	0	0	0	0	0	0	0.054635	0.054635	0	0	0	0
SOS1	2	0	0	0	0	0	0	0	0	0	0	0	0	0	0	0	0	0	0	0	0	0	0	0.127425	0.127425	0	0	0	0
KIT	2	0	0	0	0	0	0	0	0	0	0	0	0	0	0	0	0	0	0	0	0	0	0	0.093986	0.093986	0	0	0	0
PSMD12	2	0	0	0	0	0	0	0	0	0	0	0	0	0	0	0	0	0	0	0	0	0	0	0.055482	0.055482	0	0	0	0
PSMB10	2	0	0	0	0	0	0	0	0	0	0	0	0	0	0	0	0	0	0	0	0	0	0	0.050574	0.050574	0	0	0	0
MAPK8	2	0	0	0	0	0	0	0	0	0	0	0	0	0	0	0	0	0	0	0	0	0	0	0.053008	0.053008	0	0	0	0
CD24	2	0	0	0	0	0	0	0	0	0	0	0	0	0	0	0	0	0	0.050213	0	0	0	0	0.050213	0	0	0	0	0
CSK	3	0	0	0	0	0	0	0	0	0	0	0	0	0	0	0	0	0	0.061256	0	0	0	0.061256	0.061256	0	0	0	0	0
PAK3	3	0	0	0	0	0	0	0	0	0	0	0	0	0	0	0	0	0	0.11752	0	0	0	0.11752	0.11752	0	0	0	0	0
PTEN	3	0	0	0	0	0	0	0	0.068921	0	0	0	0	0	0	0	0	0	0	0	0	0	0.068921	0.068921	0	0	0	0	0
SKAP1	2	0	0	0	0	0	0	0	0	0	0	0	0	0	0	0	0	0	0	0	0	0	0.117605	0.117605	0	0	0	0	0
PTPRC	2	0	0	0	0	0	0	0	0	0	0	0	0	0	0	0	0	0	0	0	0	0	0.088868	0.088868	0	0	0	0	0
PIK3CD	2	0	0	0	0	0	0	0	0	0	0	0	0	0	0	0	0	0	0	0	0	0	0.114955	0.114955	0	0	0	0	0
TNFRSF21	2	0	0	0	0	0	0	0	0	0	0	0	0	0	0	0	0	0	0	0	0	0	0.095602	0.095602	0	0	0	0	0
MNDA	2	0	0	0	0	0	0	0	0	0	0	0	0	0	0	0	0	0	0	0	0	0	0.128708	0.128708	0	0	0	0	0
SPG21	2	0	0	0	0	0	0	0	0	0	0	0	0	0	0	0	0	0	0	0	0	0	0.063462	0.063462	0	0	0	0	0
SPPL3	2	0	0	0	0	0	0	0	0	0	0	0	0	0	0	0	0	0	0	0	0	0	0.06824	0.06824	0	0	0	0	0
CD38	2	0	0	0	0	0	0	0	0	0	0	0	0	0	0	0	0	0	0	0	0	0	0.083054	0.083054	0	0	0	0	0
RFTN2	2	0	0	0	0	0	0	0	0	0	0	0	0	0	0	0	0	0	0	0	0	0	0.0759	0.0759	0	0	0	0	0
ZAP70	2	0	0	0	0	0	0	0	0	0	0	0	0	0	0	0	0	0	0	0	0	0	0.079555	0.079555	0	0	0	0	0
CD247	5	0	0	0	0	0	0	0	0	0	0	0	0	0	0	0	0	0	0.05565	0	0	0	0	0.05565	0.05565	0.05565	0.05565	0	0
PLCG1	4	0	0	0	0	0	0	0	0	0	0	0	0	0	0	0	0	0	0	0	0	0	0	0.050848	0.050848	0.050848	0.050848	0	0
ACTB	4	0	0	0	0	0	0	0	0	0	0	0	0	0	0	0	0	0	0	0	0	0	0	0.051587	0.051587	0.051587	0.051587	0	0
CDC42	7	0	0	0	0	0	0	0	0	0	0	0	0	0	0.113449	0	0	0	0.113449	0	0	0	0.113449	0.113449	0.113449	0.113449	0.113449	0	0
FYN	6	0	0	0	0	0	0	0	0	0	0	0	0	0	0	0	0	0	0.088327	0	0	0	0.088327	0.088327	0.088327	0.088327	0.088327	0	0
VAV1	6	0	0	0	0	0	0	0	0	0	0	0	0	0	0	0	0	0	0.149818	0	0	0	0.149818	0.149818	0.149818	0.149818	0.149818	0	0
ACTG1	6	0	0	0	0	0	0.07768	0	0	0	0	0	0	0	0	0	0	0	0	0	0	0	0.07768	0.07768	0.07768	0.07768	0.07768	0	0
PTK2	6	0	0	0	0	0	0	0	0.079012	0	0	0	0	0	0	0	0	0	0	0	0	0	0.079012	0.079012	0.079012	0.079012	0.079012	0	0
HSP90AA1	6	0	0	0	0	0.061385	0	0	0	0	0	0	0	0	0	0	0	0	0	0	0	0	0.061385	0.061385	0.061385	0.061385	0.061385	0	0
CYFIP2	5	0	0	0	0	0	0	0	0	0	0	0	0	0	0	0	0	0	0	0	0	0	0.123815	0.123815	0.123815	0.123815	0.123815	0	0
NCKAP1	5	0	0	0	0	0	0	0	0	0	0	0	0	0	0	0	0	0	0	0	0	0	0.090616	0.090616	0.090616	0.090616	0.090616	0	0
WIPF3	5	0	0	0	0	0	0	0	0	0	0	0	0	0	0	0	0	0	0	0	0	0	0.159604	0.159604	0.159604	0.159604	0.159604	0	0
PLCG2	5	0	0	0	0	0	0	0	0	0	0	0	0	0	0	0	0	0	0	0	0	0	0.137111	0.137111	0.137111	0.137111	0.137111	0	0
ARPC1B	5	0	0	0	0	0	0	0	0	0	0	0	0	0	0	0	0	0	0	0	0	0	0.058053	0.058053	0.058053	0.058053	0.058053	0	0
ARPC4	5	0	0	0	0	0	0	0	0	0	0	0	0	0	0	0	0	0	0	0	0	0	0.07212	0.07212	0.07212	0.07212	0.07212	0	0
ARPC3	5	0	0	0	0	0	0	0	0	0	0	0	0	0	0	0	0	0	0	0	0	0	0.072175	0.072175	0.072175	0.072175	0.072175	0	0
HSP90AB1	5	0	0	0	0	0	0	0	0	0	0	0	0	0	0	0	0	0	0	0	0	0	0.107671	0.107671	0.107671	0.107671	0.107671	0	0
FCGR3A	5	0	0	0	0	0	0	0	0	0	0	0	0	0	0	0	0	0	0	0	0	0	0.110595	0.110595	0.110595	0.110595	0.110595	0	0
ACTR3	5	0	0	0	0	0	0	0	0	0	0	0	0	0	0	0	0	0	0	0	0	0	0.140581	0.140581	0.140581	0.140581	0.140581	0	0
BAIAP2	5	0	0	0	0	0	0	0	0	0	0	0	0	0	0	0	0	0	0	0	0	0	0.093905	0.093905	0.093905	0.093905	0.093905	0	0
FCGR2A	5	0	0	0	0	0	0	0	0	0	0	0	0	0	0	0	0	0	0	0	0	0	0.118664	0.118664	0.118664	0.118664	0.118664	0	0
SYK	5	0	0	0	0	0	0	0	0	0	0	0	0	0	0	0	0	0	0	0	0	0	0.064049	0.064049	0.064049	0.064049	0.064049	0	0
VAV2	5	0	0	0	0	0	0	0	0	0	0	0	0	0	0	0	0	0	0	0	0	0	0.083552	0.083552	0.083552	0.083552	0.083552	0	0
ELMO1	5	0	0	0	0	0	0	0	0	0	0	0	0	0	0	0	0	0	0	0	0	0	0.061148	0.061148	0.061148	0.061148	0.061148	0	0
ELMO2	5	0	0	0	0	0	0	0	0	0	0	0	0	0	0	0	0	0	0	0	0	0	0.076364	0.076364	0.076364	0.076364	0.076364	0	0
DOCK1	5	0	0	0	0	0	0	0	0	0	0	0	0	0	0	0	0	0	0	0	0	0	0.070826	0.070826	0.070826	0.070826	0.070826	0	0
MAPK1	5	0	0	0	0	0	0	0	0	0	0	0	0	0	0	0	0	0	0	0	0	0	0.100928	0.100928	0.100928	0.100928	0.100928	0	0
MAPK3	6	0	0	0	0	0	0	0	0	0	0	0	0	0	0	0	0.115937	0	0	0	0	0	0.115937	0.115937	0.115937	0.115937	0.115937	0	0
RAC1	9	0	0	0	0	0	0	0	0.073471	0	0	0	0.073471	0.073471	0	0	0	0	0.073471	0	0	0	0.073471	0.073471	0.073471	0.073471	0.073471	0	0
LIMK1	7	0	0	0	0	0	0	0	0	0	0	0	0.133028	0.133028	0	0	0	0	0	0	0	0	0.133028	0.133028	0.133028	0.133028	0.133028	0	0
HAVCR2	3	0	0	0	0	0	0	0	0	0	0	0	0	0	0	0	0.061734	0.061734	0	0	0	0	0.061734	0	0	0	0	0	0
RIPK2	4	0	0	0	0	0	0	0	0	0	0	0	0	0	0	0	0.094236	0.094236	0	0	0	0	0.094236	0.094236	0	0	0	0	0
C5	2	0	0	0	0	0	0	0	0	0	0	0	0	0	0	0	0	0.059977	0	0	0	0	0.059977	0	0	0	0	0	0
PYDC1	2	0	0	0	0	0	0	0	0	0	0	0	0	0	0	0	0	0.12512	0	0	0	0	0.12512	0	0	0	0	0	0
TLR4	3	0	0	0	0	0	0	0	0	0	0	0	0	0	0	0	0	0.090742	0	0	0	0	0.090742	0	0	0	0	0	0.090742
TLR2	3	0	0	0	0	0	0	0	0	0	0	0	0	0	0	0	0	0.136738	0	0	0	0	0.136738	0	0	0	0	0	0.136738
IL1B	2	0	0	0	0	0	0	0	0	0	0	0	0	0	0	0	0	0.119916	0	0	0	0	0	0	0	0	0	0.119916	0
HMOX1	1	0	0	0	0	0	0	0	0	0	0	0	0	0	0	0	0	0.105375	0	0	0	0	0	0	0	0	0	0	0
CSF1R	1	0	0	0	0	0	0	0	0	0	0	0	0	0	0	0	0	0.066555	0	0	0	0	0	0	0	0	0	0	0
IL33	1	0	0	0	0	0	0	0	0	0	0	0	0	0	0	0	0	0.086397	0	0	0	0	0	0	0	0	0	0	0
CD74	1	0	0	0	0	0	0	0	0	0	0	0	0	0	0	0	0	0.078271	0	0	0	0	0	0	0	0	0	0	0
IL4R	1	0	0	0	0	0	0	0	0	0	0	0	0	0	0	0	0	0.101271	0	0	0	0	0	0	0	0	0	0	0
PRKCA	1	0	0	0	0	0	0	0	0	0	0	0	0	0	0	0	0.058025	0	0	0	0	0	0	0	0	0	0	0	0
ZC3HAV1	1	0	0	0	0	0	0	0	0	0	0	0	0	0	0	0	0.081291	0	0	0	0	0	0	0	0	0	0	0	0
ANKRD17	1	0	0	0	0	0	0	0	0	0	0	0	0	0	0	0	0.048827	0	0	0	0	0	0	0	0	0	0	0	0
LY86	1	0	0	0	0	0	0	0	0	0	0	0	0	0	0	0	0.091504	0	0	0	0	0	0	0	0	0	0	0	0
DHX58	1	0	0	0	0	0	0	0	0	0	0	0	0	0	0	0	0.050293	0	0	0	0	0	0	0	0	0	0	0	0
KLK5	1	0	0	0	0	0	0	0	0	0	0	0	0	0	0	0	0.051841	0	0	0	0	0	0	0	0	0	0	0	0
KLK7	1	0	0	0	0	0	0	0	0	0	0	0	0	0	0	0	0.121911	0	0	0	0	0	0	0	0	0	0	0	0
PUM2	1	0	0	0	0	0	0	0	0	0	0	0	0	0	0	0	0.041041	0	0	0	0	0	0	0	0	0	0	0	0
CYBA	1	0	0	0	0	0	0	0	0	0	0	0	0	0	0	0	0.040923	0	0	0	0	0	0	0	0	0	0	0	0
DDX60	1	0	0	0	0	0	0	0	0	0	0	0	0	0	0	0	0.127451	0	0	0	0	0	0	0	0	0	0	0	0
SASH1	1	0	0	0	0	0	0	0	0	0	0	0	0	0	0	0	0.053461	0	0	0	0	0	0	0	0	0	0	0	0
LY96	3	0	0	0	0	0	0	0	0	0	0	0	0	0	0	0	0.123112	0	0	0	0	0	0.123112	0	0	0	0	0	0.123112
TLR1	2	0	0	0	0	0	0	0	0	0	0	0	0	0	0	0	0	0	0	0	0	0	0.12354	0	0	0	0	0	0.12354
TREM2	2	0	0	0	0	0	0	0	0	0	0	0	0	0	0	0	0	0	0	0	0	0	0	0	0	0.082967	0	0	0.082967
SSC5D	1	0	0	0	0	0	0	0	0	0	0	0	0	0	0	0	0	0	0	0	0	0	0	0	0	0	0	0	0.152087
ARPC1A	2	0	0	0	0	0	0	0	0	0	0	0	0	0	0	0	0	0	0	0	0	0	0	0	0	0.041442	0.041442	0	0
ABI1	2	0	0	0	0	0	0	0	0	0	0	0	0	0	0	0	0	0	0	0	0	0	0	0	0	0.041806	0.041806	0	0
ARPC5	2	0	0	0	0	0	0	0	0	0	0	0	0	0	0	0	0	0	0	0	0	0	0	0	0	0.04102	0.04102	0	0
ARPC2	2	0	0	0	0	0	0	0	0	0	0	0	0	0	0	0	0	0	0	0	0	0	0	0	0	0.041296	0.041296	0	0
BRK1	2	0	0	0	0	0	0	0	0	0	0	0	0	0	0	0	0	0	0	0	0	0	0	0	0	0.047747	0.047747	0	0
MYO10	2	0	0	0	0	0	0	0	0	0	0	0	0	0	0	0	0	0	0	0	0	0	0	0	0	0.042298	0.042298	0	0
CORO1C	2	0	0	0	0	0	0	0	0	0	0	0	0	0	0	0.057474	0	0	0	0	0	0	0	0	0	0.057474	0	0	0
ABCA1	1	0	0	0	0	0	0	0	0	0	0	0	0	0	0	0	0	0	0	0	0	0	0	0	0	0.107034	0	0	0
EIF2AK1	1	0	0	0	0	0	0	0	0	0	0	0	0	0	0	0	0	0	0	0	0	0	0	0	0	0.055263	0	0	0
CDC42SE2	1	0	0	0	0	0	0	0	0	0	0	0	0	0	0	0	0	0	0	0	0	0	0	0	0	0.12916	0	0	0
SRPX	1	0	0	0	0	0	0	0	0	0	0	0	0	0	0	0	0	0	0	0	0	0	0	0	0	0.096625	0	0	0
VAMP7	1	0	0	0	0	0	0	0	0	0	0	0	0	0	0	0	0	0	0	0	0	0	0	0	0	0.070005	0	0	0
CSNK1A1	1	0	0	0	0	0	0	0	0	0	0	0	0	0	0	0	0	0	0	0	0	0	0	0	0	0.046085	0	0	0
TUSC2	1	0	0	0	0	0	0	0	0	0	0	0	0	0	0	0	0	0	0	0	0	0	0	0	0	0.085103	0	0	0
RAB34	1	0	0	0	0	0	0	0	0	0	0	0	0	0	0	0	0	0	0	0	0	0	0	0	0	0.052455	0	0	0
CORO1A	1	0	0	0	0	0	0	0	0	0	0	0	0	0	0	0	0	0	0	0	0	0	0	0	0	0.043083	0	0	0
PECAM1	1	0	0	0	0	0	0	0	0	0	0	0	0	0	0	0	0	0	0	0	0	0	0	0	0	0.076659	0	0	0
CEBPE	1	0	0	0	0	0	0	0	0	0	0	0	0	0	0	0	0	0	0	0	0	0	0	0	0	0.051048	0	0	0
TUB	1	0	0	0	0	0	0	0	0	0	0	0	0	0	0	0	0	0	0	0	0	0	0	0	0	0.109135	0	0	0
RAB14	1	0	0	0	0	0	0	0	0	0	0	0	0	0	0	0	0	0	0	0	0	0	0	0	0	0.048687	0	0	0
ICAM5	1	0	0	0	0	0	0	0	0	0	0	0	0	0	0	0	0	0	0	0	0	0	0	0	0	0.086415	0	0	0
MYO7A	1	0	0	0	0	0	0	0	0	0	0	0	0	0	0	0	0	0	0	0	0	0	0	0	0	0.082761	0	0	0
MFGE8	1	0	0	0	0	0	0	0	0	0	0	0	0	0	0	0	0	0	0	0	0	0	0	0	0	0.050586	0	0	0
TGM2	1	0	0	0	0	0	0	0	0	0	0	0	0	0	0	0	0	0	0	0	0	0	0	0	0	0.074726	0	0	0
GULP1	1	0	0	0	0	0	0	0	0	0	0	0	0	0	0	0	0	0	0	0	0	0	0	0	0	0.090985	0	0	0
HMGB1	4	0	0	0	0	0	0	0	0	0	0	0	0	0	0	0.100143	0	0	0	0	0	0	0.100143	0	0	0.100143	0	0.100143	0
MARCO	2	0	0	0	0	0	0	0	0	0	0	0	0	0	0	0	0	0	0	0	0	0	0.081089	0	0	0.081089	0	0	0
COLEC12	2	0	0	0	0	0	0	0	0	0	0	0	0	0	0	0	0	0	0	0	0	0	0.068657	0	0	0.068657	0	0	0
SKAP2	1	0	0	0	0	0	0	0	0	0	0	0	0	0	0	0	0	0	0	0	0	0	0.082692	0	0	0	0	0	0
CFD	1	0	0	0	0	0	0	0	0	0	0	0	0	0	0	0	0	0	0	0	0	0	0.120658	0	0	0	0	0	0
CFH	1	0	0	0	0	0	0	0	0	0	0	0	0	0	0	0	0	0	0	0	0	0	0.069671	0	0	0	0	0	0
C3	1	0	0	0	0	0	0	0	0	0	0	0	0	0	0	0	0	0	0	0	0	0	0.058171	0	0	0	0	0	0
CYLD	1	0	0	0	0	0	0	0	0	0	0	0	0	0	0	0	0	0	0	0	0	0	0.076156	0	0	0	0	0	0
MYD88	1	0	0	0	0	0	0	0	0	0	0	0	0	0	0	0	0	0	0	0	0	0	0.089187	0	0	0	0	0	0
ITGAM	1	0	0	0	0	0	0	0	0	0	0	0	0	0	0	0	0	0	0	0	0	0	0.059086	0	0	0	0	0	0
BIRC3	1	0	0	0	0	0	0	0	0	0	0	0	0	0	0	0	0	0	0	0	0	0	0.109357	0	0	0	0	0	0
UNC93B1	1	0	0	0	0	0	0	0	0	0	0	0	0	0	0	0	0	0	0	0	0	0	0.065823	0	0	0	0	0	0
VSIG4	1	0	0	0	0	0	0	0	0	0	0	0	0	0	0	0	0	0	0	0	0	0	0.094537	0	0	0	0	0	0
C1QB	1	0	0	0	0	0	0	0	0	0	0	0	0	0	0	0	0	0	0	0	0	0	0.071957	0	0	0	0	0	0
C1QA	1	0	0	0	0	0	0	0	0	0	0	0	0	0	0	0	0	0	0	0	0	0	0.097805	0	0	0	0	0	0
SUSD4	1	0	0	0	0	0	0	0	0	0	0	0	0	0	0	0	0	0	0	0	0	0	0.191983	0	0	0	0	0	0
CD55	1	0	0	0	0	0	0	0	0	0	0	0	0	0	0	0	0	0	0	0	0	0	0.068533	0	0	0	0	0	0
TNIP3	1	0	0	0	0	0	0	0	0	0	0	0	0	0	0	0	0	0	0	0	0	0	0.078248	0	0	0	0	0	0
SCFD1	2	0	0.084479	0	0	0	0	0	0	0	0	0	0	0	0	0	0	0	0	0	0	0	0	0	0	0.084479	0	0	0
FNBP1L	1	0	0.080185	0	0	0	0	0	0	0	0	0	0	0	0	0	0	0	0	0	0	0	0	0	0	0	0	0	0
TFG	1	0	0.11694	0	0	0	0	0	0	0	0	0	0	0	0	0	0	0	0	0	0	0	0	0	0	0	0	0	0
SAR1B	1	0	0.091749	0	0	0	0	0	0	0	0	0	0	0	0	0	0	0	0	0	0	0	0	0	0	0	0	0	0
ARF1	1	0	0.049205	0	0	0	0	0	0	0	0	0	0	0	0	0	0	0	0	0	0	0	0	0	0	0	0	0	0
SERPINA1	1	0	0.071726	0	0	0	0	0	0	0	0	0	0	0	0	0	0	0	0	0	0	0	0	0	0	0	0	0	0
F8	1	0	0.044811	0	0	0	0	0	0	0	0	0	0	0	0	0	0	0	0	0	0	0	0	0	0	0	0	0	0
AP2S1	1	0	0.057954	0	0	0	0	0	0	0	0	0	0	0	0	0	0	0	0	0	0	0	0	0	0	0	0	0	0
ATP8A2	1	0	0.115126	0	0	0	0	0	0	0	0	0	0	0	0	0	0	0	0	0	0	0	0	0	0	0	0	0	0
ATP8A1	1	0	0.058571	0	0	0	0	0	0	0	0	0	0	0	0	0	0	0	0	0	0	0	0	0	0	0	0	0	0
GRIA1	1	0	0.104782	0	0	0	0	0	0	0	0	0	0	0	0	0	0	0	0	0	0	0	0	0	0	0	0	0	0
TRAPPC2	1	0	0.07163	0	0	0	0	0	0	0	0	0	0	0	0	0	0	0	0	0	0	0	0	0	0	0	0	0	0
ANKRD28	1	0	0.071412	0	0	0	0	0	0	0	0	0	0	0	0	0	0	0	0	0	0	0	0	0	0	0	0	0	0
CNIH2	1	0	0.123114	0	0	0	0	0	0	0	0	0	0	0	0	0	0	0	0	0	0	0	0	0	0	0	0	0	0
CNIH3	1	0	0.172145	0	0	0	0	0	0	0	0	0	0	0	0	0	0	0	0	0	0	0	0	0	0	0	0	0	0
MCFD2	1	0	0.096028	0	0	0	0	0	0	0	0	0	0	0	0	0	0	0	0	0	0	0	0	0	0	0	0	0	0
PIK3C2A	1	0	0.043983	0	0	0	0	0	0	0	0	0	0	0	0	0	0	0	0	0	0	0	0	0	0	0	0	0	0
PPP6R1	1	0	0.040131	0	0	0	0	0	0	0	0	0	0	0	0	0	0	0	0	0	0	0	0	0	0	0	0	0	0
PDCD6IP	1	0	0.044639	0	0	0	0	0	0	0	0	0	0	0	0	0	0	0	0	0	0	0	0	0	0	0	0	0	0
VPS37C	1	0	0.049211	0	0	0	0	0	0	0	0	0	0	0	0	0	0	0	0	0	0	0	0	0	0	0	0	0	0
VPS37B	1	0	0.048197	0	0	0	0	0	0	0	0	0	0	0	0	0	0	0	0	0	0	0	0	0	0	0	0	0	0
RAB1A	1	0	0.049529	0	0	0	0	0	0	0	0	0	0	0	0	0	0	0	0	0	0	0	0	0	0	0	0	0	0
VPS4B	1	0	0.052168	0	0	0	0	0	0	0	0	0	0	0	0	0	0	0	0	0	0	0	0	0	0	0	0	0	0
SEC24A	1	0	0.054038	0	0	0	0	0	0	0	0	0	0	0	0	0	0	0	0	0	0	0	0	0	0	0	0	0	0
VAPB	1	0	0.089955	0	0	0	0	0	0	0	0	0	0	0	0	0	0	0	0	0	0	0	0	0	0	0	0	0	0
SEC24D	1	0	0.058447	0	0	0	0	0	0	0	0	0	0	0	0	0	0	0	0	0	0	0	0	0	0	0	0	0	0
FOLR1	1	0	0.054224	0	0	0	0	0	0	0	0	0	0	0	0	0	0	0	0	0	0	0	0	0	0	0	0	0	0
SEC24C	1	0	0.042993	0	0	0	0	0	0	0	0	0	0	0	0	0	0	0	0	0	0	0	0	0	0	0	0	0	0
SNX3	1	0	0.075146	0	0	0	0	0	0	0	0	0	0	0	0	0	0	0	0	0	0	0	0	0	0	0	0	0	0
SNAP91	1	0	0.068561	0	0	0	0	0	0	0	0	0	0	0	0	0	0	0	0	0	0	0	0	0	0	0	0	0	0
CHMP1B	1	0	0.12198	0	0	0	0	0	0	0	0	0	0	0	0	0	0	0	0	0	0	0	0	0	0	0	0	0	0
CHMP1A	1	0	0.062767	0	0	0	0	0	0	0	0	0	0	0	0	0	0	0	0	0	0	0	0	0	0	0	0	0	0
CD59	1	0	0.102167	0	0	0	0	0	0	0	0	0	0	0	0	0	0	0	0	0	0	0	0	0	0	0	0	0	0
GBF1	1	0	0.07124	0	0	0	0	0	0	0	0	0	0	0	0	0	0	0	0	0	0	0	0	0	0	0	0	0	0
AP2B1	1	0	0.124866	0	0	0	0	0	0	0	0	0	0	0	0	0	0	0	0	0	0	0	0	0	0	0	0	0	0
NSF	1	0	0.089381	0	0	0	0	0	0	0	0	0	0	0	0	0	0	0	0	0	0	0	0	0	0	0	0	0	0
TRAPPC2L	1	0	0.07006	0	0	0	0	0	0	0	0	0	0	0	0	0	0	0	0	0	0	0	0	0	0	0	0	0	0
TMED10	1	0	0.11567	0	0	0	0	0	0	0	0	0	0	0	0	0	0	0	0	0	0	0	0	0	0	0	0	0	0
TSG101	1	0	0.089216	0	0	0	0	0	0	0	0	0	0	0	0	0	0	0	0	0	0	0	0	0	0	0	0	0	0
KLHL12	1	0	0.11291	0	0	0	0	0	0	0	0	0	0	0	0	0	0	0	0	0	0	0	0	0	0	0	0	0	0
VTA1	1	0	0.054785	0	0	0	0	0	0	0	0	0	0	0	0	0	0	0	0	0	0	0	0	0	0	0	0	0	0
CHMP2B	1	0	0.088575	0	0	0	0	0	0	0	0	0	0	0	0	0	0	0	0	0	0	0	0	0	0	0	0	0	0
CHMP6	1	0	0.053352	0	0	0	0	0	0	0	0	0	0	0	0	0	0	0	0	0	0	0	0	0	0	0	0	0	0
GOLPH3	1	0	0.040173	0	0	0	0	0	0	0	0	0	0	0	0	0	0	0	0	0	0	0	0	0	0	0	0	0	0
CHMP4B	2	0.04092	0.04092	0	0	0	0	0	0	0	0	0	0	0	0	0	0	0	0	0	0	0	0	0	0	0	0	0	0
CHMP4A	2	0.061849	0.061849	0	0	0	0	0	0	0	0	0	0	0	0	0	0	0	0	0	0	0	0	0	0	0	0	0	0
RPL4	1	0.029206	0	0	0	0	0	0	0	0	0	0	0	0	0	0	0	0	0	0	0	0	0	0	0	0	0	0	0
RPL30	1	0.074999	0	0	0	0	0	0	0	0	0	0	0	0	0	0	0	0	0	0	0	0	0	0	0	0	0	0	0
RPL32	1	0.052289	0	0	0	0	0	0	0	0	0	0	0	0	0	0	0	0	0	0	0	0	0	0	0	0	0	0	0
RPL31	1	0.061904	0	0	0	0	0	0	0	0	0	0	0	0	0	0	0	0	0	0	0	0	0	0	0	0	0	0	0
RPL34	1	0.050304	0	0	0	0	0	0	0	0	0	0	0	0	0	0	0	0	0	0	0	0	0	0	0	0	0	0	0
RPL6	1	0.062532	0	0	0	0	0	0	0	0	0	0	0	0	0	0	0	0	0	0	0	0	0	0	0	0	0	0	0
RPL36	1	0.037371	0	0	0	0	0	0	0	0	0	0	0	0	0	0	0	0	0	0	0	0	0	0	0	0	0	0	0
RPL35	1	0.052108	0	0	0	0	0	0	0	0	0	0	0	0	0	0	0	0	0	0	0	0	0	0	0	0	0	0	0
RPL37	1	0.088343	0	0	0	0	0	0	0	0	0	0	0	0	0	0	0	0	0	0	0	0	0	0	0	0	0	0	0
RPL39	1	0.05733	0	0	0	0	0	0	0	0	0	0	0	0	0	0	0	0	0	0	0	0	0	0	0	0	0	0	0
RPL21	1	0.038831	0	0	0	0	0	0	0	0	0	0	0	0	0	0	0	0	0	0	0	0	0	0	0	0	0	0	0
RPL23	1	0.04213	0	0	0	0	0	0	0	0	0	0	0	0	0	0	0	0	0	0	0	0	0	0	0	0	0	0	0
RPL22	1	0.023398	0	0	0	0	0	0	0	0	0	0	0	0	0	0	0	0	0	0	0	0	0	0	0	0	0	0	0
RPL24	1	0.029822	0	0	0	0	0	0	0	0	0	0	0	0	0	0	0	0	0	0	0	0	0	0	0	0	0	0	0
RPL27	1	0.05158	0	0	0	0	0	0	0	0	0	0	0	0	0	0	0	0	0	0	0	0	0	0	0	0	0	0	0
RPL26	1	0.050784	0	0	0	0	0	0	0	0	0	0	0	0	0	0	0	0	0	0	0	0	0	0	0	0	0	0	0
RPL29	1	0.0508	0	0	0	0	0	0	0	0	0	0	0	0	0	0	0	0	0	0	0	0	0	0	0	0	0	0	0
RPL28	1	0.044633	0	0	0	0	0	0	0	0	0	0	0	0	0	0	0	0	0	0	0	0	0	0	0	0	0	0	0
RPS4Y1	1	0.027862	0	0	0	0	0	0	0	0	0	0	0	0	0	0	0	0	0	0	0	0	0	0	0	0	0	0	0
RPL41	1	0.054983	0	0	0	0	0	0	0	0	0	0	0	0	0	0	0	0	0	0	0	0	0	0	0	0	0	0	0
RPLP1	1	0.038668	0	0	0	0	0	0	0	0	0	0	0	0	0	0	0	0	0	0	0	0	0	0	0	0	0	0	0
RPLP0	1	0.027667	0	0	0	0	0	0	0	0	0	0	0	0	0	0	0	0	0	0	0	0	0	0	0	0	0	0	0
SRP54	1	0.037672	0	0	0	0	0	0	0	0	0	0	0	0	0	0	0	0	0	0	0	0	0	0	0	0	0	0	0
SRP9	1	0.062064	0	0	0	0	0	0	0	0	0	0	0	0	0	0	0	0	0	0	0	0	0	0	0	0	0	0	0
RPL12	1	0.06814	0	0	0	0	0	0	0	0	0	0	0	0	0	0	0	0	0	0	0	0	0	0	0	0	0	0	0
RPS15A	1	0.035751	0	0	0	0	0	0	0	0	0	0	0	0	0	0	0	0	0	0	0	0	0	0	0	0	0	0	0
RPS2	1	0.023112	0	0	0	0	0	0	0	0	0	0	0	0	0	0	0	0	0	0	0	0	0	0	0	0	0	0	0
RPL19	1	0.055459	0	0	0	0	0	0	0	0	0	0	0	0	0	0	0	0	0	0	0	0	0	0	0	0	0	0	0
RPL10A	1	0.02962	0	0	0	0	0	0	0	0	0	0	0	0	0	0	0	0	0	0	0	0	0	0	0	0	0	0	0
RPS9	1	0.035754	0	0	0	0	0	0	0	0	0	0	0	0	0	0	0	0	0	0	0	0	0	0	0	0	0	0	0
RPS6	1	0.057213	0	0	0	0	0	0	0	0	0	0	0	0	0	0	0	0	0	0	0	0	0	0	0	0	0	0	0
RPL35A	1	0.074455	0	0	0	0	0	0	0	0	0	0	0	0	0	0	0	0	0	0	0	0	0	0	0	0	0	0	0
RPL23A	1	0.07132	0	0	0	0	0	0	0	0	0	0	0	0	0	0	0	0	0	0	0	0	0	0	0	0	0	0	0
RAB10	1	0.123185	0	0	0	0	0	0	0	0	0	0	0	0	0	0	0	0	0	0	0	0	0	0	0	0	0	0	0
RPS14	1	0.026089	0	0	0	0	0	0	0	0	0	0	0	0	0	0	0	0	0	0	0	0	0	0	0	0	0	0	0
RPS17	1	0.0486	0	0	0	0	0	0	0	0	0	0	0	0	0	0	0	0	0	0	0	0	0	0	0	0	0	0	0
RPS18	1	0.0479	0	0	0	0	0	0	0	0	0	0	0	0	0	0	0	0	0	0	0	0	0	0	0	0	0	0	0
SEC62	1	0.03319	0	0	0	0	0	0	0	0	0	0	0	0	0	0	0	0	0	0	0	0	0	0	0	0	0	0	0
RPS10	1	0.026472	0	0	0	0	0	0	0	0	0	0	0	0	0	0	0	0	0	0	0	0	0	0	0	0	0	0	0
RPS13	1	0.045168	0	0	0	0	0	0	0	0	0	0	0	0	0	0	0	0	0	0	0	0	0	0	0	0	0	0	0
RPS12	1	0.096286	0	0	0	0	0	0	0	0	0	0	0	0	0	0	0	0	0	0	0	0	0	0	0	0	0	0	0
SEC63	1	0.062074	0	0	0	0	0	0	0	0	0	0	0	0	0	0	0	0	0	0	0	0	0	0	0	0	0	0	0
RPS26	1	0.026569	0	0	0	0	0	0	0	0	0	0	0	0	0	0	0	0	0	0	0	0	0	0	0	0	0	0	0
RPS25	1	0.041872	0	0	0	0	0	0	0	0	0	0	0	0	0	0	0	0	0	0	0	0	0	0	0	0	0	0	0
RPS27	1	0.064736	0	0	0	0	0	0	0	0	0	0	0	0	0	0	0	0	0	0	0	0	0	0	0	0	0	0	0
RPS29	1	0.055775	0	0	0	0	0	0	0	0	0	0	0	0	0	0	0	0	0	0	0	0	0	0	0	0	0	0	0
RPL27A	1	0.193285	0	0	0	0	0	0	0	0	0	0	0	0	0	0	0	0	0	0	0	0	0	0	0	0	0	0	0
RPS20	1	0.098298	0	0	0	0	0	0	0	0	0	0	0	0	0	0	0	0	0	0	0	0	0	0	0	0	0	0	0
RPS21	1	0.03375	0	0	0	0	0	0	0	0	0	0	0	0	0	0	0	0	0	0	0	0	0	0	0	0	0	0	0
RPS24	1	0.063907	0	0	0	0	0	0	0	0	0	0	0	0	0	0	0	0	0	0	0	0	0	0	0	0	0	0	0
RPS23	1	0.024719	0	0	0	0	0	0	0	0	0	0	0	0	0	0	0	0	0	0	0	0	0	0	0	0	0	0	0
SEC61G	1	0.040252	0	0	0	0	0	0	0	0	0	0	0	0	0	0	0	0	0	0	0	0	0	0	0	0	0	0	0
SPCS2	1	0.026792	0	0	0	0	0	0	0	0	0	0	0	0	0	0	0	0	0	0	0	0	0	0	0	0	0	0	0
SPCS1	1	0.023423	0	0	0	0	0	0	0	0	0	0	0	0	0	0	0	0	0	0	0	0	0	0	0	0	0	0	0
RAB3GAP2	1	0.024258	0	0	0	0	0	0	0	0	0	0	0	0	0	0	0	0	0	0	0	0	0	0	0	0	0	0	0
FAU	1	0.070287	0	0	0	0	0	0	0	0	0	0	0	0	0	0	0	0	0	0	0	0	0	0	0	0	0	0	0
RAB3GAP1	1	0.035658	0	0	0	0	0	0	0	0	0	0	0	0	0	0	0	0	0	0	0	0	0	0	0	0	0	0	0
SRP19	1	0.051006	0	0	0	0	0	0	0	0	0	0	0	0	0	0	0	0	0	0	0	0	0	0	0	0	0	0	0
RPS4X	1	0.034212	0	0	0	0	0	0	0	0	0	0	0	0	0	0	0	0	0	0	0	0	0	0	0	0	0	0	0
RPS3A	1	0.033053	0	0	0	0	0	0	0	0	0	0	0	0	0	0	0	0	0	0	0	0	0	0	0	0	0	0	0
RPL26L1	1	0.058663	0	0	0	0	0	0	0	0	0	0	0	0	0	0	0	0	0	0	0	0	0	0	0	0	0	0	0

## Sheet: Memory cortical -
Name	# genesets	GO_DETECTION_OF_CHEMICAL_STIMULUS_INVOLVED_IN_SENSORY_PERCEPTION_OF_TASTE_signal	GO_NEGATIVE_REGULATION_OF_HISTONE_METHYLATION_signal	GO_REGULATION_OF_GENE_SILENCING_signal	GO_REGULATION_OF_CHROMATIN_SILENCING_signal	GO_REGULATION_OF_GENE_EXPRESSION_EPIGENETIC_signal	GO_NEGATIVE_REGULATION_OF_MYELOID_CELL_DIFFERENTIATION_signal	GO_TELOMERE_ORGANIZATION_signal	GO_NON_RECOMBINATIONAL_REPAIR_signal	GO_BETA_CATENIN_TCF_COMPLEX_ASSEMBLY_signal	GO_TELOMERE_CAPPING_signal	GO_DNA_REPLICATION_INDEPENDENT_NUCLEOSOME_ORGANIZATION_signal	GO_HISTONE_EXCHANGE_signal	GO_CENTROMERE_COMPLEX_ASSEMBLY_signal	GO_NEGATIVE_REGULATION_OF_MEGAKARYOCYTE_DIFFERENTIATION_signal	GO_NEGATIVE_REGULATION_OF_HEMATOPOIETIC_PROGENITOR_CELL_DIFFERENTIATION_signal	GO_REGULATION_OF_MEGAKARYOCYTE_DIFFERENTIATION_signal	GO_REGULATION_OF_HEMATOPOIETIC_PROGENITOR_CELL_DIFFERENTIATION_signal	GO_CHROMATIN_ASSEMBLY_OR_DISASSEMBLY_signal	GO_DNA_PACKAGING_signal	GO_POSITIVE_REGULATION_OF_GENE_EXPRESSION_EPIGENETIC_signal	GO_NEGATIVE_REGULATION_OF_GENE_EXPRESSION_EPIGENETIC_signal	GO_CHROMATIN_SILENCING_signal	GO_DNA_REPLICATION_DEPENDENT_NUCLEOSOME_ORGANIZATION_signal	GO_CHROMATIN_SILENCING_AT_RDNA_signal	GO_PROTEIN_HETEROTETRAMERIZATION_signal	GO_PROTEIN_HETEROOLIGOMERIZATION_signal	GO_DOUBLE_STRAND_BREAK_REPAIR_signal	GO_ENTRAINMENT_OF_CIRCADIAN_CLOCK_BY_PHOTOPERIOD_signal	GO_PHOTOPERIODISM_signal
MEF2C	2	0	0	0	0	0	0	0	0	0	0	0	0	0	0	0	-0.074278	-0.074278	0	0	0	0	0	0	0	0	0	0	0	0
ZBTB1	1	0	0	0	0	0	0	0	0	0	0	0	0	0	0	0	0	-0.097675	0	0	0	0	0	0	0	0	0	0	0	0
N4BP2L2	2	0	0	0	0	0	0	0	0	0	0	0	0	0	0	-0.106418	0	-0.106418	0	0	0	0	0	0	0	0	0	0	0	0
HIST1H4K	23	0	0	0	0	-0.097262	-0.097262	-0.097262	-0.097262	-0.097262	-0.097262	-0.097262	-0.097262	-0.097262	-0.097262	-0.097262	-0.097262	-0.097262	-0.097262	-0.097262	-0.097262	-0.097262	-0.097262	-0.097262	-0.097262	-0.097262	-0.097262	-0.097262	0	0
HIST1H4A	23	0	0	0	0	-0.175205	-0.175205	-0.175205	-0.175205	-0.175205	-0.175205	-0.175205	-0.175205	-0.175205	-0.175205	-0.175205	-0.175205	-0.175205	-0.175205	-0.175205	-0.175205	-0.175205	-0.175205	-0.175205	-0.175205	-0.175205	-0.175205	-0.175205	0	0
HIST1H4B	23	0	0	0	0	-0.100063	-0.100063	-0.100063	-0.100063	-0.100063	-0.100063	-0.100063	-0.100063	-0.100063	-0.100063	-0.100063	-0.100063	-0.100063	-0.100063	-0.100063	-0.100063	-0.100063	-0.100063	-0.100063	-0.100063	-0.100063	-0.100063	-0.100063	0	0
HIST1H4H	23	0	0	0	0	-0.125473	-0.125473	-0.125473	-0.125473	-0.125473	-0.125473	-0.125473	-0.125473	-0.125473	-0.125473	-0.125473	-0.125473	-0.125473	-0.125473	-0.125473	-0.125473	-0.125473	-0.125473	-0.125473	-0.125473	-0.125473	-0.125473	-0.125473	0	0
HIST1H4I	23	0	0	0	0	-0.119042	-0.119042	-0.119042	-0.119042	-0.119042	-0.119042	-0.119042	-0.119042	-0.119042	-0.119042	-0.119042	-0.119042	-0.119042	-0.119042	-0.119042	-0.119042	-0.119042	-0.119042	-0.119042	-0.119042	-0.119042	-0.119042	-0.119042	0	0
HIST1H4J	23	0	0	0	0	-0.108773	-0.108773	-0.108773	-0.108773	-0.108773	-0.108773	-0.108773	-0.108773	-0.108773	-0.108773	-0.108773	-0.108773	-0.108773	-0.108773	-0.108773	-0.108773	-0.108773	-0.108773	-0.108773	-0.108773	-0.108773	-0.108773	-0.108773	0	0
HIST1H4D	23	0	0	0	0	-0.08606	-0.08606	-0.08606	-0.08606	-0.08606	-0.08606	-0.08606	-0.08606	-0.08606	-0.08606	-0.08606	-0.08606	-0.08606	-0.08606	-0.08606	-0.08606	-0.08606	-0.08606	-0.08606	-0.08606	-0.08606	-0.08606	-0.08606	0	0
HIST1H4E	23	0	0	0	0	-0.165325	-0.165325	-0.165325	-0.165325	-0.165325	-0.165325	-0.165325	-0.165325	-0.165325	-0.165325	-0.165325	-0.165325	-0.165325	-0.165325	-0.165325	-0.165325	-0.165325	-0.165325	-0.165325	-0.165325	-0.165325	-0.165325	-0.165325	0	0
HIST1H4F	23	0	0	0	0	-0.09082	-0.09082	-0.09082	-0.09082	-0.09082	-0.09082	-0.09082	-0.09082	-0.09082	-0.09082	-0.09082	-0.09082	-0.09082	-0.09082	-0.09082	-0.09082	-0.09082	-0.09082	-0.09082	-0.09082	-0.09082	-0.09082	-0.09082	0	0
HIST4H4	23	0	0	0	0	-0.110557	-0.110557	-0.110557	-0.110557	-0.110557	-0.110557	-0.110557	-0.110557	-0.110557	-0.110557	-0.110557	-0.110557	-0.110557	-0.110557	-0.110557	-0.110557	-0.110557	-0.110557	-0.110557	-0.110557	-0.110557	-0.110557	-0.110557	0	0
HMGB2	4	0	0	0	0	0	0	0	0	0	0	0	0	0	0	0	-0.0989	-0.0989	-0.0989	-0.0989	0	0	0	0	0	0	0	0	0	0
SMC2	1	0	0	0	0	0	0	0	0	0	0	0	0	0	0	0	0	0	0	-0.067008	0	0	0	0	0	0	0	0	0	0
SRPK1	1	0	0	0	0	0	0	0	0	0	0	0	0	0	0	0	0	0	0	-0.068826	0	0	0	0	0	0	0	0	0	0
DFFB	1	0	0	0	0	0	0	0	0	0	0	0	0	0	0	0	0	0	0	-0.078401	0	0	0	0	0	0	0	0	0	0
PAF1	3	0	0	0	0	0	-0.072718	0	0	0	0	0	0	0	0	0	0	0	-0.072718	-0.072718	0	0	0	0	0	0	0	0	0	0
TSPYL1	2	0	0	0	0	0	0	0	0	0	0	0	0	0	0	0	0	0	-0.077561	-0.077561	0	0	0	0	0	0	0	0	0	0
CDKN2A	2	0	0	0	0	0	0	0	0	0	0	0	0	0	0	0	0	0	-0.062966	-0.062966	0	0	0	0	0	0	0	0	0	0
HIST1H1D	2	0	0	0	0	0	0	0	0	0	0	0	0	0	0	0	0	0	-0.192628	-0.192628	0	0	0	0	0	0	0	0	0	0
HIST1H1E	2	0	0	0	0	0	0	0	0	0	0	0	0	0	0	0	0	0	-0.087602	-0.087602	0	0	0	0	0	0	0	0	0	0
HIST1H1A	2	0	0	0	0	0	0	0	0	0	0	0	0	0	0	0	0	0	-0.073071	-0.073071	0	0	0	0	0	0	0	0	0	0
MCM2	2	0	0	0	0	0	0	0	0	0	0	0	0	0	0	0	0	0	-0.066101	-0.066101	0	0	0	0	0	0	0	0	0	0
MIS18BP1	5	0	0	0	0	0	0	0	0	0	0	-0.064989	-0.064989	-0.064989	0	0	0	0	-0.064989	-0.064989	0	0	0	0	0	0	0	0	0	0
CENPK	5	0	0	0	0	0	0	0	0	0	0	-0.075309	-0.075309	-0.075309	0	0	0	0	-0.075309	-0.075309	0	0	0	0	0	0	0	0	0	0
NASP	5	0	0	0	0	0	0	0	0	0	0	-0.077447	-0.077447	0	0	0	0	0	-0.077447	-0.077447	0	0	0	-0.077447	0	0	0	0	0	0
RBBP4	8	0	0	0	0	-0.063851	0	0	0	0	0	-0.063851	-0.063851	-0.063851	0	0	0	0	-0.063851	-0.063851	0	-0.063851	0	-0.063851	0	0	0	0	0	0
CABIN1	2	0	0	0	0	0	0	0	0	0	0	-0.053553	0	0	0	0	0	0	-0.053553	0	0	0	0	0	0	0	0	0	0	0
TSPYL2	1	0	0	0	0	0	0	0	0	0	0	0	0	0	0	0	0	0	-0.039304	0	0	0	0	0	0	0	0	0	0	0
SMARCC1	1	0	0	0	0	0	0	0	0	0	0	0	0	0	0	0	0	0	-0.056492	0	0	0	0	0	0	0	0	0	0	0
TSPYL4	1	0	0	0	0	0	0	0	0	0	0	0	0	0	0	0	0	0	-0.041762	0	0	0	0	0	0	0	0	0	0	0
SUV39H2	1	0	0	0	0	0	0	0	0	0	0	0	0	0	0	0	0	0	-0.049046	0	0	0	0	0	0	0	0	0	0	0
SHPRH	1	0	0	0	0	0	0	0	0	0	0	0	0	0	0	0	0	0	-0.044963	0	0	0	0	0	0	0	0	0	0	0
ARID2	1	0	0	0	0	0	0	0	0	0	0	0	0	0	0	0	0	0	-0.044415	0	0	0	0	0	0	0	0	0	0	0
HIST1H2BG	1	0	0	0	0	0	0	0	0	0	0	0	0	0	0	0	0	0	-0.044819	0	0	0	0	0	0	0	0	0	0	0
HP1BP3	1	0	0	0	0	0	0	0	0	0	0	0	0	0	0	0	0	0	-0.042418	0	0	0	0	0	0	0	0	0	0	0
HIST1H1C	1	0	0	0	0	0	0	0	0	0	0	0	0	0	0	0	0	0	-0.053999	0	0	0	0	0	0	0	0	0	0	0
ATRX	1	0	0	0	0	0	0	0	0	0	0	0	0	0	0	0	0	0	-0.038998	0	0	0	0	0	0	0	0	0	0	0
HDAC8	1	0	0	0	0	0	0	0	0	0	0	0	0	0	0	0	0	0	-0.046954	0	0	0	0	0	0	0	0	0	0	0
NAP1L2	1	0	0	0	0	0	0	0	0	0	0	0	0	0	0	0	0	0	-0.051222	0	0	0	0	0	0	0	0	0	0	0
MYC	2	0	0	0	0	0	-0.086985	0	0	-0.086985	0	0	0	0	0	0	0	0	0	0	0	0	0	0	0	0	0	0	0	0
LEO1	2	0	0	0	0	0	-0.090609	0	0	-0.090609	0	0	0	0	0	0	0	0	0	0	0	0	0	0	0	0	0	0	0	0
CREBBP	1	0	0	0	0	0	0	0	0	-0.070637	0	0	0	0	0	0	0	0	0	0	0	0	0	0	0	0	0	0	0	0
TLE2	1	0	0	0	0	0	0	0	0	-0.107685	0	0	0	0	0	0	0	0	0	0	0	0	0	0	0	0	0	0	0	0
TCF7L2	1	0	0	0	0	0	0	0	0	-0.07945	0	0	0	0	0	0	0	0	0	0	0	0	0	0	0	0	0	0	0	0
CARTPT	1	0	0	0	0	0	-0.071277	0	0	0	0	0	0	0	0	0	0	0	0	0	0	0	0	0	0	0	0	0	0	0
ZBTB16	1	0	0	0	0	0	-0.159366	0	0	0	0	0	0	0	0	0	0	0	0	0	0	0	0	0	0	0	0	0	0	0
NFKBIA	1	0	0	0	0	0	-0.086131	0	0	0	0	0	0	0	0	0	0	0	0	0	0	0	0	0	0	0	0	0	0	0
MAFB	1	0	0	0	0	0	-0.134496	0	0	0	0	0	0	0	0	0	0	0	0	0	0	0	0	0	0	0	0	0	0	0
RBM15	1	0	0	0	0	0	-0.100752	0	0	0	0	0	0	0	0	0	0	0	0	0	0	0	0	0	0	0	0	0	0	0
KLF13	1	0	0	0	0	0	-0.164265	0	0	0	0	0	0	0	0	0	0	0	0	0	0	0	0	0	0	0	0	0	0	0
MEIS1	1	0	0	0	0	0	-0.069368	0	0	0	0	0	0	0	0	0	0	0	0	0	0	0	0	0	0	0	0	0	0	0
PTPN2	1	0	0	0	0	0	-0.071551	0	0	0	0	0	0	0	0	0	0	0	0	0	0	0	0	0	0	0	0	0	0	0
TAS2R20	1	-0.048624	0	0	0	0	0	0	0	0	0	0	0	0	0	0	0	0	0	0	0	0	0	0	0	0	0	0	0	0
PKD2L1	1	-0.037652	0	0	0	0	0	0	0	0	0	0	0	0	0	0	0	0	0	0	0	0	0	0	0	0	0	0	0	0
TAS2R10	1	-0.094727	0	0	0	0	0	0	0	0	0	0	0	0	0	0	0	0	0	0	0	0	0	0	0	0	0	0	0	0
TAS2R13	1	-0.095707	0	0	0	0	0	0	0	0	0	0	0	0	0	0	0	0	0	0	0	0	0	0	0	0	0	0	0	0
TAS2R14	1	-0.121135	0	0	0	0	0	0	0	0	0	0	0	0	0	0	0	0	0	0	0	0	0	0	0	0	0	0	0	0
TAS2R19	1	-0.042924	0	0	0	0	0	0	0	0	0	0	0	0	0	0	0	0	0	0	0	0	0	0	0	0	0	0	0	0
AZGP1	1	-0.05781	0	0	0	0	0	0	0	0	0	0	0	0	0	0	0	0	0	0	0	0	0	0	0	0	0	0	0	0
TAS2R43	1	-0.06682	0	0	0	0	0	0	0	0	0	0	0	0	0	0	0	0	0	0	0	0	0	0	0	0	0	0	0	0
TAS2R45	1	-0.092157	0	0	0	0	0	0	0	0	0	0	0	0	0	0	0	0	0	0	0	0	0	0	0	0	0	0	0	0
TAS2R30	1	-0.068896	0	0	0	0	0	0	0	0	0	0	0	0	0	0	0	0	0	0	0	0	0	0	0	0	0	0	0	0
TAS2R31	1	-0.080977	0	0	0	0	0	0	0	0	0	0	0	0	0	0	0	0	0	0	0	0	0	0	0	0	0	0	0	0
TAS2R50	1	-0.050783	0	0	0	0	0	0	0	0	0	0	0	0	0	0	0	0	0	0	0	0	0	0	0	0	0	0	0	0
TAS2R5	1	-0.034888	0	0	0	0	0	0	0	0	0	0	0	0	0	0	0	0	0	0	0	0	0	0	0	0	0	0	0	0
TAS2R4	1	-0.043097	0	0	0	0	0	0	0	0	0	0	0	0	0	0	0	0	0	0	0	0	0	0	0	0	0	0	0	0
TAS1R1	1	-0.037385	0	0	0	0	0	0	0	0	0	0	0	0	0	0	0	0	0	0	0	0	0	0	0	0	0	0	0	0
NMU	1	0	0	0	0	0	0	0	0	0	0	0	0	0	0	0	0	0	0	0	0	0	0	0	0	0	0	0	0	-0.101189
AANAT	1	0	0	0	0	0	0	0	0	0	0	0	0	0	0	0	0	0	0	0	0	0	0	0	0	0	0	0	0	-0.032971
RBM4	3	0	0	0	0	-0.045439	0	0	0	0	0	0	0	0	0	0	0	0	0	0	0	0	0	0	0	0	0	0	-0.045439	-0.045439
NR2F6	2	0	0	0	0	0	0	0	0	0	0	0	0	0	0	0	0	0	0	0	0	0	0	0	0	0	0	0	-0.090301	-0.090301
ID2	2	0	0	0	0	0	0	0	0	0	0	0	0	0	0	0	0	0	0	0	0	0	0	0	0	0	0	0	-0.049991	-0.049991
PER1	2	0	0	0	0	0	0	0	0	0	0	0	0	0	0	0	0	0	0	0	0	0	0	0	0	0	0	0	-0.118892	-0.118892
PPP1CB	2	0	0	0	0	0	0	0	0	0	0	0	0	0	0	0	0	0	0	0	0	0	0	0	0	0	0	0	-0.05197	-0.05197
USP2	2	0	0	0	0	0	0	0	0	0	0	0	0	0	0	0	0	0	0	0	0	0	0	0	0	0	0	0	-0.035193	-0.035193
BHLHE40	2	0	0	0	0	0	0	0	0	0	0	0	0	0	0	0	0	0	0	0	0	0	0	0	0	0	0	0	-0.057642	-0.057642
RBM4B	2	0	0	0	0	0	0	0	0	0	0	0	0	0	0	0	0	0	0	0	0	0	0	0	0	0	0	0	-0.046635	-0.046635
PML	2	0	0	0	0	0	0	0	0	0	0	0	0	0	0	0	0	0	0	0	0	0	0	0	0	0	0	0	-0.039456	-0.039456
INSR	2	0	0	0	0	0	0	0	0	0	0	0	0	0	0	0	0	0	0	0	0	0	0	0	0	-0.069004	-0.069004	0	0	0
NUP54	2	0	0	0	0	0	0	0	0	0	0	0	0	0	0	0	0	0	0	0	0	0	0	0	0	-0.107176	-0.107176	0	0	0
PRKAB1	1	0	0	0	0	0	0	0	0	0	0	0	0	0	0	0	0	0	0	0	0	0	0	0	0	0	-0.099267	0	0	0
CLDN3	1	0	0	0	0	0	0	0	0	0	0	0	0	0	0	0	0	0	0	0	0	0	0	0	0	0	-0.059252	0	0	0
BCL10	1	0	0	0	0	0	0	0	0	0	0	0	0	0	0	0	0	0	0	0	0	0	0	0	0	0	-0.120174	0	0	0
IDE	1	0	0	0	0	0	0	0	0	0	0	0	0	0	0	0	0	0	0	0	0	0	0	0	0	0	-0.089559	0	0	0
TNNT2	1	0	0	0	0	0	0	0	0	0	0	0	0	0	0	0	0	0	0	0	0	0	0	0	0	0	-0.060518	0	0	0
HR	1	0	0	0	0	0	0	0	0	0	0	0	0	0	0	0	0	0	0	0	0	0	0	0	0	0	-0.136675	0	0	0
SQSTM1	1	0	0	0	0	0	0	0	0	0	0	0	0	0	0	0	0	0	0	0	0	0	0	0	0	0	-0.066328	0	0	0
CHRNA2	1	0	0	0	0	0	0	0	0	0	0	0	0	0	0	0	0	0	0	0	0	0	0	0	0	0	-0.094732	0	0	0
TRAF2	1	0	0	0	0	0	0	0	0	0	0	0	0	0	0	0	0	0	0	0	0	0	0	0	0	0	-0.106223	0	0	0
P2RX6	1	0	0	0	0	0	0	0	0	0	0	0	0	0	0	0	0	0	0	0	0	0	0	0	0	0	-0.08103	0	0	0
TONSL	1	0	0	0	0	0	0	0	0	0	0	0	0	0	0	0	0	0	0	0	0	0	0	0	0	0	0	-0.042082	0	0
SMC5	1	0	0	0	0	0	0	0	0	0	0	0	0	0	0	0	0	0	0	0	0	0	0	0	0	0	0	-0.034017	0	0
CHEK2	1	0	0	0	0	0	0	0	0	0	0	0	0	0	0	0	0	0	0	0	0	0	0	0	0	0	0	-0.038079	0	0
RECQL	1	0	0	0	0	0	0	0	0	0	0	0	0	0	0	0	0	0	0	0	0	0	0	0	0	0	0	-0.087986	0	0
EXD2	1	0	0	0	0	0	0	0	0	0	0	0	0	0	0	0	0	0	0	0	0	0	0	0	0	0	0	-0.035584	0	0
PAXIP1	1	0	0	0	0	0	0	0	0	0	0	0	0	0	0	0	0	0	0	0	0	0	0	0	0	0	0	-0.063773	0	0
BRCC3	1	0	0	0	0	0	0	0	0	0	0	0	0	0	0	0	0	0	0	0	0	0	0	0	0	0	0	-0.047555	0	0
NHEJ1	1	0	0	0	0	0	0	0	0	0	0	0	0	0	0	0	0	0	0	0	0	0	0	0	0	0	0	-0.037506	0	0
XRCC1	1	0	0	0	0	0	0	0	0	0	0	0	0	0	0	0	0	0	0	0	0	0	0	0	0	0	0	-0.055831	0	0
CDC7	1	0	0	0	0	0	0	0	0	0	0	0	0	0	0	0	0	0	0	0	0	0	0	0	0	0	0	-0.033856	0	0
INO80	1	0	0	0	0	0	0	0	0	0	0	0	0	0	0	0	0	0	0	0	0	0	0	0	0	0	0	-0.034761	0	0
RAD54B	1	0	0	0	0	0	0	0	0	0	0	0	0	0	0	0	0	0	0	0	0	0	0	0	0	0	0	-0.116384	0	0
RECQL5	1	0	0	0	0	0	0	0	0	0	0	0	0	0	0	0	0	0	0	0	0	0	0	0	0	0	0	-0.044047	0	0
RAD54L	1	0	0	0	0	0	0	0	0	0	0	0	0	0	0	0	0	0	0	0	0	0	0	0	0	0	0	-0.034454	0	0
APBB1	1	0	0	0	0	0	0	0	0	0	0	0	0	0	0	0	0	0	0	0	0	0	0	0	0	0	0	-0.067054	0	0
RPA3	1	0	0	0	0	0	0	0	0	0	0	0	0	0	0	0	0	0	0	0	0	0	0	0	0	0	0	-0.047488	0	0
DCLRE1B	1	0	0	0	0	0	0	0	0	0	0	0	0	0	0	0	0	0	0	0	0	0	0	0	0	0	0	-0.041574	0	0
SMARCAD1	1	0	0	0	0	0	0	0	0	0	0	0	0	0	0	0	0	0	0	0	0	0	0	0	0	0	0	-0.044655	0	0
PIAS4	1	0	0	0	0	0	0	0	0	0	0	0	0	0	0	0	0	0	0	0	0	0	0	0	0	0	0	-0.048643	0	0
BLM	1	0	0	0	0	0	0	0	0	0	0	0	0	0	0	0	0	0	0	0	0	0	0	0	0	0	0	-0.070175	0	0
DDX1	1	0	0	0	0	0	0	0	0	0	0	0	0	0	0	0	0	0	0	0	0	0	0	0	0	0	0	-0.034643	0	0
HELQ	1	0	0	0	0	0	0	0	0	0	0	0	0	0	0	0	0	0	0	0	0	0	0	0	0	0	0	-0.093401	0	0
PALB2	1	0	0	0	0	0	0	0	0	0	0	0	0	0	0	0	0	0	0	0	0	0	0	0	0	0	0	-0.078096	0	0
MCM8	1	0	0	0	0	0	0	0	0	0	0	0	0	0	0	0	0	0	0	0	0	0	0	0	0	0	0	-0.062646	0	0
POLL	1	0	0	0	0	0	0	0	0	0	0	0	0	0	0	0	0	0	0	0	0	0	0	0	0	0	0	-0.048739	0	0
PAPD7	1	0	0	0	0	0	0	0	0	0	0	0	0	0	0	0	0	0	0	0	0	0	0	0	0	0	0	-0.051781	0	0
FAN1	1	0	0	0	0	0	0	0	0	0	0	0	0	0	0	0	0	0	0	0	0	0	0	0	0	0	0	-0.040502	0	0
KDM4D	1	0	0	0	0	0	0	0	0	0	0	0	0	0	0	0	0	0	0	0	0	0	0	0	0	0	0	-0.042433	0	0
POLN	1	0	0	0	0	0	0	0	0	0	0	0	0	0	0	0	0	0	0	0	0	0	0	0	0	0	0	-0.074969	0	0
EYA3	1	0	0	0	0	0	0	0	0	0	0	0	0	0	0	0	0	0	0	0	0	0	0	0	0	0	0	-0.095564	0	0
MDC1	2	0	0	0	0	0	0	0	-0.086948	0	0	0	0	0	0	0	0	0	0	0	0	0	0	0	0	0	0	-0.086948	0	0
UIMC1	2	0	0	0	0	0	0	0	-0.126966	0	0	0	0	0	0	0	0	0	0	0	0	0	0	0	0	0	0	-0.126966	0	0
RIF1	2	0	0	0	0	0	0	0	-0.108203	0	0	0	0	0	0	0	0	0	0	0	0	0	0	0	0	0	0	-0.108203	0	0
RAD52	2	0	0	0	0	0	0	0	-0.09022	0	0	0	0	0	0	0	0	0	0	0	0	0	0	0	0	0	0	-0.09022	0	0
DCLRE1A	4	0	0	0	0	0	0	-0.0826	-0.0826	0	-0.0826	0	0	0	0	0	0	0	0	0	0	0	0	0	0	0	0	-0.0826	0	0
TINF2	2	0	0	0	0	0	0	-0.064057	0	0	-0.064057	0	0	0	0	0	0	0	0	0	0	0	0	0	0	0	0	0	0	0
TFIP11	2	0	0	0	0	0	0	-0.065924	0	0	-0.065924	0	0	0	0	0	0	0	0	0	0	0	0	0	0	0	0	0	0	0
UPF1	2	0	0	0	0	-0.054744	0	-0.054744	0	0	0	0	0	0	0	0	0	0	0	0	0	0	0	0	0	0	0	0	0	0
PIF1	1	0	0	0	0	0	0	-0.155335	0	0	0	0	0	0	0	0	0	0	0	0	0	0	0	0	0	0	0	0	0	0
RTEL1	1	0	0	0	0	0	0	-0.076425	0	0	0	0	0	0	0	0	0	0	0	0	0	0	0	0	0	0	0	0	0	0
PCNA	1	0	0	0	0	0	0	-0.088468	0	0	0	0	0	0	0	0	0	0	0	0	0	0	0	0	0	0	0	0	0	0
PRIM1	1	0	0	0	0	0	0	-0.093678	0	0	0	0	0	0	0	0	0	0	0	0	0	0	0	0	0	0	0	0	0	0
PINX1	1	0	0	0	0	0	0	-0.085279	0	0	0	0	0	0	0	0	0	0	0	0	0	0	0	0	0	0	0	0	0	0
POLD3	1	0	0	0	0	0	0	-0.089672	0	0	0	0	0	0	0	0	0	0	0	0	0	0	0	0	0	0	0	0	0	0
POLD1	1	0	0	0	0	0	0	-0.069438	0	0	0	0	0	0	0	0	0	0	0	0	0	0	0	0	0	0	0	0	0	0
DNA2	2	0	0	0	0	0	0	-0.05852	0	0	0	0	0	0	0	0	0	0	0	0	0	0	0	0	0	0	0	-0.05852	0	0
RAD51C	2	0	0	0	0	0	0	-0.077024	0	0	0	0	0	0	0	0	0	0	0	0	0	0	0	0	0	0	0	-0.077024	0	0
ERCC4	2	0	0	0	0	0	0	-0.055711	0	0	0	0	0	0	0	0	0	0	0	0	0	0	0	0	0	0	0	-0.055711	0	0
HIST3H3	7	0	0	0	0	0	0	-0.070466	0	0	-0.070466	0	0	0	0	0	0	0	-0.070466	-0.070466	0	0	0	0	0	-0.070466	-0.070466	-0.070466	0	0
BRCA1	3	0	-0.040812	0	0	-0.040812	0	0	0	0	0	0	0	0	0	0	0	0	0	0	0	0	0	0	0	0	0	-0.040812	0	0
KDM4A	1	0	-0.048087	0	0	0	0	0	0	0	0	0	0	0	0	0	0	0	0	0	0	0	0	0	0	0	0	0	0	0
BCOR	1	0	-0.128146	0	0	0	0	0	0	0	0	0	0	0	0	0	0	0	0	0	0	0	0	0	0	0	0	0	0	0
HIST1H3C	3	0	0	-0.040984	0	-0.040984	0	0	0	0	0	0	0	0	0	0	0	0	-0.040984	0	0	0	0	0	0	0	0	0	0	0
DND1	1	0	0	-0.054089	0	0	0	0	0	0	0	0	0	0	0	0	0	0	0	0	0	0	0	0	0	0	0	0	0	0
NCOR2	1	0	0	-0.091071	0	0	0	0	0	0	0	0	0	0	0	0	0	0	0	0	0	0	0	0	0	0	0	0	0	0
NCOR1	1	0	0	-0.049482	0	0	0	0	0	0	0	0	0	0	0	0	0	0	0	0	0	0	0	0	0	0	0	0	0	0
FMR1	1	0	0	-0.042964	0	0	0	0	0	0	0	0	0	0	0	0	0	0	0	0	0	0	0	0	0	0	0	0	0	0
BCDIN3D	1	0	0	-0.036062	0	0	0	0	0	0	0	0	0	0	0	0	0	0	0	0	0	0	0	0	0	0	0	0	0	0
TRIM28	1	0	0	0	-0.032112	0	0	0	0	0	0	0	0	0	0	0	0	0	0	0	0	0	0	0	0	0	0	0	0	0
ASF1A	1	0	0	0	-0.021916	0	0	0	0	0	0	0	0	0	0	0	0	0	0	0	0	0	0	0	0	0	0	0	0	0
SIRT1	1	0	0	0	-0.018592	0	0	0	0	0	0	0	0	0	0	0	0	0	0	0	0	0	0	0	0	0	0	0	0	0
ATAD2	1	0	0	0	-0.01938	0	0	0	0	0	0	0	0	0	0	0	0	0	0	0	0	0	0	0	0	0	0	0	0	0
ZNF304	1	0	0	0	-0.018995	0	0	0	0	0	0	0	0	0	0	0	0	0	0	0	0	0	0	0	0	0	0	0	0	0
MIER1	2	0	0	-0.055009	-0.055009	0	0	0	0	0	0	0	0	0	0	0	0	0	0	0	0	0	0	0	0	0	0	0	0	0
SETDB1	2	0	0	-0.108864	-0.108864	0	0	0	0	0	0	0	0	0	0	0	0	0	0	0	0	0	0	0	0	0	0	0	0	0
UHRF1	2	0	0	-0.04454	-0.04454	0	0	0	0	0	0	0	0	0	0	0	0	0	0	0	0	0	0	0	0	0	0	0	0	0
DNMT1	4	0	-0.038042	-0.038042	-0.038042	-0.038042	0	0	0	0	0	0	0	0	0	0	0	0	0	0	0	0	0	0	0	0	0	0	0	0
PHF2	4	0	0	-0.058706	-0.058706	-0.058706	0	0	0	0	0	0	0	0	0	0	0	0	0	0	-0.058706	0	0	0	0	0	0	0	0	0
PHF8	4	0	0	-0.085696	-0.085696	-0.085696	0	0	0	0	0	0	0	0	0	0	0	0	0	0	-0.085696	0	0	0	0	0	0	0	0	0
TET1	4	0	0	-0.056015	-0.056015	-0.056015	0	0	0	0	0	0	0	0	0	0	0	0	0	0	-0.056015	0	0	0	0	0	0	0	0	0
ATAD2B	4	0	0	-0.089474	-0.089474	-0.089474	0	0	0	0	0	0	0	0	0	0	0	0	0	0	-0.089474	0	0	0	0	0	0	0	0	0
HIST1H3J	12	0	0	-0.06327	0	-0.06327	0	-0.06327	0	0	0	0	0	0	0	0	0	0	-0.06327	-0.06327	-0.06327	-0.06327	-0.06327	-0.06327	-0.06327	-0.06327	-0.06327	0	0	0
HIST1H3A	12	0	0	-0.109802	0	-0.109802	0	-0.109802	0	0	0	0	0	0	0	0	0	0	-0.109802	-0.109802	-0.109802	-0.109802	-0.109802	-0.109802	-0.109802	-0.109802	-0.109802	0	0	0
HIST1H3F	12	0	0	-0.141572	0	-0.141572	0	-0.141572	0	0	0	0	0	0	0	0	0	0	-0.141572	-0.141572	-0.141572	-0.141572	-0.141572	-0.141572	-0.141572	-0.141572	-0.141572	0	0	0
HIST1H3G	12	0	0	-0.121149	0	-0.121149	0	-0.121149	0	0	0	0	0	0	0	0	0	0	-0.121149	-0.121149	-0.121149	-0.121149	-0.121149	-0.121149	-0.121149	-0.121149	-0.121149	0	0	0
HIST1H3H	12	0	0	-0.094674	0	-0.094674	0	-0.094674	0	0	0	0	0	0	0	0	0	0	-0.094674	-0.094674	-0.094674	-0.094674	-0.094674	-0.094674	-0.094674	-0.094674	-0.094674	0	0	0
HIST1H3B	12	0	0	-0.084078	0	-0.084078	0	-0.084078	0	0	0	0	0	0	0	0	0	0	-0.084078	-0.084078	-0.084078	-0.084078	-0.084078	-0.084078	-0.084078	-0.084078	-0.084078	0	0	0
HIST1H3D	12	0	0	-0.13486	0	-0.13486	0	-0.13486	0	0	0	0	0	0	0	0	0	0	-0.13486	-0.13486	-0.13486	-0.13486	-0.13486	-0.13486	-0.13486	-0.13486	-0.13486	0	0	0
HIST1H3E	12	0	0	-0.064056	0	-0.064056	0	-0.064056	0	0	0	0	0	0	0	0	0	0	-0.064056	-0.064056	-0.064056	-0.064056	-0.064056	-0.064056	-0.064056	-0.064056	-0.064056	0	0	0
HAT1	5	0	0	0	0	-0.055385	0	0	0	0	0	-0.055385	0	0	0	0	0	0	-0.055385	0	0	-0.055385	-0.055385	0	0	0	0	0	0	0
BAHD1	5	0	0	0	0	-0.076436	0	0	0	0	0	0	0	0	0	0	0	0	-0.076436	-0.076436	0	-0.076436	-0.076436	0	0	0	0	0	0	0
EPC1	2	0	0	0	0	-0.073749	0	0	0	0	0	0	0	0	0	0	0	0	0	0	0	-0.073749	0	0	0	0	0	0	0	0
SUZ12	2	0	0	0	0	-0.099861	0	0	0	0	0	0	0	0	0	0	0	0	0	0	0	-0.099861	0	0	0	0	0	0	0	0
CREBZF	2	0	0	0	0	-0.103252	0	0	0	0	0	0	0	0	0	0	0	0	0	0	0	-0.103252	0	0	0	0	0	0	0	0
MECP2	4	0	-0.05625	0	0	-0.05625	0	0	0	0	0	0	0	0	0	0	0	0	0	0	0	-0.05625	-0.05625	0	0	0	0	0	0	0
JARID2	3	0	-0.090968	0	0	-0.090968	0	0	0	0	0	0	0	0	0	0	0	0	0	0	0	-0.090968	0	0	0	0	0	0	0	0
MTF2	3	0	-0.089584	0	0	-0.089584	0	0	0	0	0	0	0	0	0	0	0	0	0	0	0	-0.089584	0	0	0	0	0	0	0	0
DNMT3B	3	0	-0.081857	0	0	-0.081857	0	0	0	0	0	0	0	0	0	0	0	0	0	0	0	-0.081857	0	0	0	0	0	0	0	0
DOT1L	4	0	0	0	0	-0.105343	0	-0.105343	0	0	0	0	0	0	0	0	0	0	0	0	0	-0.105343	-0.105343	0	0	0	0	0	0	0
MSL3P1	3	0	0	0	0	-0.050381	0	0	0	0	0	0	0	0	0	0	0	0	0	0	0	-0.050381	-0.050381	0	0	0	0	0	0	0
SIRT4	3	0	0	0	0	-0.117826	0	0	0	0	0	0	0	0	0	0	0	0	0	0	0	-0.117826	-0.117826	0	0	0	0	0	0	0
HIST1H2AE	3	0	0	0	0	-0.093189	0	0	0	0	0	0	0	0	0	0	0	0	0	0	0	-0.093189	-0.093189	0	0	0	0	0	0	0
HIST1H2AB	3	0	0	0	0	-0.062088	0	0	0	0	0	0	0	0	0	0	0	0	0	0	0	-0.062088	-0.062088	0	0	0	0	0	0	0
HIST1H2AH	3	0	0	0	0	-0.049521	0	0	0	0	0	0	0	0	0	0	0	0	0	0	0	-0.049521	-0.049521	0	0	0	0	0	0	0
UBR2	3	0	0	0	0	-0.049844	0	0	0	0	0	0	0	0	0	0	0	0	0	0	0	-0.049844	-0.049844	0	0	0	0	0	0	0
H2AFZ	3	0	0	0	0	-0.068045	0	0	0	0	0	0	0	0	0	0	0	0	0	0	0	-0.068045	-0.068045	0	0	0	0	0	0	0
DNMT3A	3	0	0	0	0	-0.055683	0	0	0	0	0	0	0	0	0	0	0	0	0	0	0	-0.055683	-0.055683	0	0	0	0	0	0	0
BEND3	4	0	0	0	0	-0.056045	0	0	0	0	0	0	0	0	0	0	0	0	0	0	0	-0.056045	-0.056045	0	-0.056045	0	0	0	0	0
MYBBP1A	2	0	0	0	0	-0.094923	0	0	0	0	0	0	0	0	0	0	0	0	0	0	-0.094923	0	0	0	0	0	0	0	0	0
ZNRD1	2	0	0	0	0	-0.072285	0	0	0	0	0	0	0	0	0	0	0	0	0	0	-0.072285	0	0	0	0	0	0	0	0	0
POLR1D	2	0	0	0	0	-0.07109	0	0	0	0	0	0	0	0	0	0	0	0	0	0	-0.07109	0	0	0	0	0	0	0	0	0
TAF1C	2	0	0	0	0	-0.053841	0	0	0	0	0	0	0	0	0	0	0	0	0	0	-0.053841	0	0	0	0	0	0	0	0	0
DEK	2	0	0	0	0	-0.058224	0	0	0	0	0	0	0	0	0	0	0	0	0	0	-0.058224	0	0	0	0	0	0	0	0	0
ERCC6	2	0	0	0	0	-0.071473	0	0	0	0	0	0	0	0	0	0	0	0	0	0	-0.071473	0	0	0	0	0	0	0	0	0
METTL3	1	0	0	0	0	-0.037039	0	0	0	0	0	0	0	0	0	0	0	0	0	0	0	0	0	0	0	0	0	0	0	0
DICER1	1	0	0	0	0	-0.04858	0	0	0	0	0	0	0	0	0	0	0	0	0	0	0	0	0	0	0	0	0	0	0	0
BAZ2A	1	0	0	0	0	-0.044469	0	0	0	0	0	0	0	0	0	0	0	0	0	0	0	0	0	0	0	0	0	0	0	0
TERT	1	0	0	0	0	-0.030025	0	0	0	0	0	0	0	0	0	0	0	0	0	0	0	0	0	0	0	0	0	0	0	0
EZH2	1	0	0	0	0	-0.035169	0	0	0	0	0	0	0	0	0	0	0	0	0	0	0	0	0	0	0	0	0	0	0	0
CTCF	1	0	0	0	0	-0.030581	0	0	0	0	0	0	0	0	0	0	0	0	0	0	0	0	0	0	0	0	0	0	0	0
HELLS	1	0	0	0	0	-0.029518	0	0	0	0	0	0	0	0	0	0	0	0	0	0	0	0	0	0	0	0	0	0	0	0
PRMT7	1	0	0	0	0	-0.109744	0	0	0	0	0	0	0	0	0	0	0	0	0	0	0	0	0	0	0	0	0	0	0	0
BAZ1B	1	0	0	0	0	-0.030092	0	0	0	0	0	0	0	0	0	0	0	0	0	0	0	0	0	0	0	0	0	0	0	0
KAT2A	1	0	0	0	0	-0.033188	0	0	0	0	0	0	0	0	0	0	0	0	0	0	0	0	0	0	0	0	0	0	0	0
SRRT	1	0	0	0	0	-0.03159	0	0	0	0	0	0	0	0	0	0	0	0	0	0	0	0	0	0	0	0	0	0	0	0
EXOSC10	1	0	0	0	0	-0.062468	0	0	0	0	0	0	0	0	0	0	0	0	0	0	0	0	0	0	0	0	0	0	0	0
SF3B1	1	0	0	0	0	-0.033287	0	0	0	0	0	0	0	0	0	0	0	0	0	0	0	0	0	0	0	0	0	0	0	0
MBD3	1	0	0	0	0	-0.035571	0	0	0	0	0	0	0	0	0	0	0	0	0	0	0	0	0	0	0	0	0	0	0	0
MBD1	1	0	0	0	0	-0.030652	0	0	0	0	0	0	0	0	0	0	0	0	0	0	0	0	0	0	0	0	0	0	0	0
MBD2	1	0	0	0	0	-0.034847	0	0	0	0	0	0	0	0	0	0	0	0	0	0	0	0	0	0	0	0	0	0	0	0
TARBP2	1	0	0	0	0	-0.08347	0	0	0	0	0	0	0	0	0	0	0	0	0	0	0	0	0	0	0	0	0	0	0	0
CTNNB1	1	0	0	0	0	-0.045392	0	0	0	0	0	0	0	0	0	0	0	0	0	0	0	0	0	0	0	0	0	0	0	0
ARID4B	1	0	0	0	0	-0.031484	0	0	0	0	0	0	0	0	0	0	0	0	0	0	0	0	0	0	0	0	0	0	0	0
SMCHD1	1	0	0	0	0	-0.098888	0	0	0	0	0	0	0	0	0	0	0	0	0	0	0	0	0	0	0	0	0	0	0	0
TFAP2C	1	0	0	0	0	-0.045408	0	0	0	0	0	0	0	0	0	0	0	0	0	0	0	0	0	0	0	0	0	0	0	0
GLMN	1	0	0	0	0	-0.043347	0	0	0	0	0	0	0	0	0	0	0	0	0	0	0	0	0	0	0	0	0	0	0	0
LIN28B	1	0	0	0	0	-0.037446	0	0	0	0	0	0	0	0	0	0	0	0	0	0	0	0	0	0	0	0	0	0	0	0
CNOT1	1	0	0	0	0	-0.036449	0	0	0	0	0	0	0	0	0	0	0	0	0	0	0	0	0	0	0	0	0	0	0	0
CNOT8	1	0	0	0	0	-0.067989	0	0	0	0	0	0	0	0	0	0	0	0	0	0	0	0	0	0	0	0	0	0	0	0
CELF1	1	0	0	0	0	-0.034828	0	0	0	0	0	0	0	0	0	0	0	0	0	0	0	0	0	0	0	0	0	0	0	0
H2AFJ	1	0	0	0	0	-0.030413	0	0	0	0	0	0	0	0	0	0	0	0	0	0	0	0	0	0	0	0	0	0	0	0
GPX1	1	0	0	0	0	-0.054666	0	0	0	0	0	0	0	0	0	0	0	0	0	0	0	0	0	0	0	0	0	0	0	0
HDAC4	1	0	0	0	0	-0.077667	0	0	0	0	0	0	0	0	0	0	0	0	0	0	0	0	0	0	0	0	0	0	0	0
HDAC6	1	0	0	0	0	-0.111537	0	0	0	0	0	0	0	0	0	0	0	0	0	0	0	0	0	0	0	0	0	0	0	0
TAF1D	1	0	0	0	0	-0.043305	0	0	0	0	0	0	0	0	0	0	0	0	0	0	0	0	0	0	0	0	0	0	0	0
TDG	1	0	0	0	0	-0.064837	0	0	0	0	0	0	0	0	0	0	0	0	0	0	0	0	0	0	0	0	0	0	0	0
TAF1A	1	0	0	0	0	-0.049529	0	0	0	0	0	0	0	0	0	0	0	0	0	0	0	0	0	0	0	0	0	0	0	0
TNRC6C	1	0	0	0	0	-0.065921	0	0	0	0	0	0	0	0	0	0	0	0	0	0	0	0	0	0	0	0	0	0	0	0
TNRC6A	1	0	0	0	0	-0.034099	0	0	0	0	0	0	0	0	0	0	0	0	0	0	0	0	0	0	0	0	0	0	0	0
