# Supplementary material for: Distinct Genetic Signatures of Cortical and Subcortical Regions Associated with Human Memory
Source: eNeuro. 2019 Dec 13;6(6):ENEURO.0283-19.2019. doi: 10.1523/ENEURO.0283-19.2019 (PMC6917897; doi:10.1523/ENEURO.0283-19.2019)
Supplement: Extended Data Table 4-1 — Candidate genes for the subcortical memory analysis. Literature review for the candidate genes derived from the LEA of subcortical memory gene sets, ranked by the number of gene sets it is found in. Download Table 4-1, XLSX file. [file sup_enu-eN-NWR-0283-19-s14.xlsx]

## Sheet: Summary
Legend			METHOD SPECIFICITY SCORING
Gene	Memory function (strong evidence)		Candidate gene list	Memory Subcortical +	Memory Subcortical -
Gene	Memory function (weak evidence)		Genes with Mems	7	0
Gene	No evidence for either		Genes with Memw	3	7
			Genes with Mots	2	0
			Genes with Motw	3	0
Legend			All candidate gene lists
Mems	Memory function (strong evidence)		Candidate gene list	Memory subcortical +	Memory subcortical -
Memw	Memory function (weak evidence)			CDK5	RPL34
				NLGN1	RPS12
				UNC13B	RPS13
				RAB3A	RPS15A
			Candidate genes per list	STX1A	RPS29
				SYT12	RPL11
				STX1B	RPL37A
				SNCA	RPL10
				SYT1	RPS25
				UNC13A	RPS27

## Sheet: Memory Subcortical (+)
Gene symbol	No. of genesets	Mean r-value	Function	Mems		Memw		Mots		Motw
CDK5	27	0.264297	Memory	Guan, J. S., Su, S. C., Gao, J., Joseph, N., Xie, Z., Zhou, Y., … Tsai, L. H. (2011). Cdk5 is required for memory function and hippocampal plasticity via the camp signaling pathway. PLoS ONE, 6(9), e25735. https://doi.org/10.1371/journal.pone.0025735
NLGN1	26	0.514126	Memory	Bie, B., Wu, J., Yang, H., Xu, J. J., Brown, D. L., & Naguib, M. (2014). Epigenetic suppression of neuroligin 1 underlies amyloid-induced memory deficiency. Nature Neuroscience, 17(2), 223–231. https://doi.org/10.1038/nn.3618
UNC13B	26	0.378572	Memory-related			Breustedt, J., Gundlfinger, A., Varoqueaux, F., Reim, K., Brose, N., & Schmitz, D. (2009). Munc13-2 differentially affects hippocampal synaptic transmission and plasticity. Cerebral Cortex, 20(5), 1109-1120.
RAB3A	25	0.39792	Memory	Yang, S., Farias, M., Kapfhamer, D., Tobias, J., Grant, G., Abel, T., & Bućan, M. (2007). Biochemical, molecular and behavioral phenotypes of Rab3A mutations in the mouse. Genes, Brain and Behavior, 6(1), 77–96. https://doi.org/10.1111/j.1601-183X.2006.00235.x				D’Adamo, P., Wolfer, D. P., Kopp, C., Tobler, I., Toniolo, D., & Lipp, H.-P. (2004). Mice deficient for the synaptic vesicle protein Rab3a show impaired spatial reversal learning and increased explorative activity but none of the behavioral changes shown by mice deficient for the Rab3a regulator Gdi1. European Journal of Neuroscience, 19(7), 1895–1905. https://doi.org/10.1111/j.1460-9568.2004.032…
STX1A	24	0.569644	Memory	Fujiwara, T., Mishima, T., Kofuji, T., Chiba, T., Tanaka, K., Yamamoto, A., & Akagawa, K. (2006). Analysis of knock-out mice to determine the role of HPC-1/syntaxin 1A in expressing synaptic plasticity. The Journal of Neuroscience : The Official Journal of the Society for Neuroscience, 26(21), 5767–5776. https://doi.org/10.1523/JNEUROSCI.0289-06.2006
SYT12	23	0.436173	Memory-related			Kaeser-Woo, Y. J., Younts, T. J., Yang, X., Zhou, P., Wu, D., Castillo, P. E., & Südhof, T. C. (2013). Synaptotagmin-12 phosphorylation by cAMP-dependent protein kinase is essential for hippocampal mossy fiber LTP. Journal of Neuroscience, 33(23), 9769-9780.
STX1B	22	0.448724	Memory-related			Orme, T., Guerreiro, R., & Bras, J. (2018). The genetics of dementia with Lewy bodies: current understanding and future directions. Current neurology and neuroscience reports, 18(10), 67.	Zhang, Q., Ma, C., Gearing, M., Wang, P. G., Chin, L. S., & Li, L. (2018). Integrated proteomics and network analysis identifies protein hubs and network alterations in Alzheimer’s disease. Acta neuropathologica communications, 6(1), 19.
SNCA	21	0.443739	Memory	Kokhan, V. S., Afanasyeva, M. A., & Van’kin, G. I. (2012). α-Synuclein knockout mice have cognitive impairments. Behavioural Brain Research, 231(1), 226–230. https://doi.org/10.1016/j.bbr.2012.03.026				Richfield, E. K., Thiruchelvam, M. J., Cory-Slechta, D. A., Wuertzer, C., Gainetdinov, R. R., Caron, M. G., ... & Federoff, H. J. (2002). Behavioral and neurochemical effects of wild-type and mutated human α-synuclein in transgenic mice. Experimental neurology, 175(1), 35-48.
SYT1	21	0.389936	Memory	Liu, Y.-F., Chen, H., Wu, C.-L., Kuo, Y.-M., Yu, L., Huang, A.-M., … Jen, C. J. (2009). Differential effects of treadmill running and wheel running on spatial or aversive learning and memory: roles of amygdalar brain-derived neurotrophic factor and synaptotagmin I. The Journal of Physiology, 587(13), 3221–3231. https://doi.org/10.1113/jphysiol.2009.173088
UNC13A	20	0.455544	Memory	Böhme, M. A., McCarthy, A. W., Grasskamp, A. T., Beuschel, C. B., Goel, P., Jusyte, M., … Walter, A. M. (2019). Rapid active zone remodeling consolidates presynaptic potentiation. Nature Communications, 10(1), 1085. https://doi.org/10.1038/s41467-019-08977-6
STXBP1	19	0.518976
STX3	18	0.294959
SYNJ1	17	0.569213
SNAP25	17	0.542817
SYT5	17	0.455998
RIMS1	17	0.402934
VAMP2	17	0.367864
SYT7	17	0.35259
SYT11	17	0.304287
DOC2B	16	0.486622
EPHB2	15	0.529575
SYTL2	15	0.280104
DOC2A	14	0.542824
SYT17	14	0.510347
C2CD4D	14	0.473126
C2CD4C	14	0.467804
CPLX2	14	0.41214
SYT4	14	0.410321
SYT3	14	0.281339
C2CD4A	14	0.265584
NRXN1	14	0.253905
NAPA	13	0.493267
PIP5K1C	13	0.468808
GRIK5	13	0.331579
OPHN1	13	0.321546
DLG4	13	0.312151
GRIN1	13	0.288789
SNAP29	12	0.397789
GRIK2	12	0.393184
SYN1	11	0.579408
ARF1	11	0.470425
TOR1A	11	0.457348
BRAF	11	0.320327
GSK3B	11	0.292257
RAB8A	11	0.287883
PCLO	10	0.461014
CADPS	10	0.437601
CADPS2	10	0.437519
PACSIN1	10	0.323086
MEF2C	10	0.304646
NLGN3	10	0.287165
DNAJC5	10	0.265471
CHRNB2	10	0.262542
EPHA4	9	0.482044
SHANK1	9	0.437954
MAPK1	9	0.403885
MAPK8IP2	9	0.359411
EGR2	9	0.32281
PFN2	8	0.603174
SLIT1	8	0.580632
CNIH2	8	0.543109
GRIA1	8	0.517397
CDK5R1	8	0.472522
MINK1	8	0.461743
PLXNA4	8	0.423856
PTK2B	8	0.400256
DCLK1	8	0.388076
TNR	8	0.381932
SH3GL2	8	0.379346
RAB11A	8	0.372229
CANX	8	0.3555
DENND1A	8	0.351194
LIN7A	8	0.338716
PPFIA3	8	0.302395
APP	8	0.294823
SLIT2	8	0.250967
KCNB1	8	0.229528
SYNGAP1	7	0.582102
CNIH3	7	0.564388
NCAM1	7	0.549599
DNM1	7	0.524258
DCC	7	0.506065
GRIN2A	7	0.505685
CAMK2A	7	0.499652
NFIB	7	0.496745
NRP1	7	0.479611
ALS2	7	0.458978
NETO1	7	0.44279
BAIAP2	7	0.431786
SLITRK5	7	0.400616
PPP3CB	7	0.398066
VAMP7	7	0.362649
FYN	7	0.343479
BRSK1	7	0.338351
FEZF2	6	0.621535
ARC	6	0.530294
CHN1	6	0.478961
PAK3	6	0.471089
MAP2	6	0.460267
HPRT1	6	0.440562
MAP6	6	0.436952
NR4A2	6	0.426841
EPHA7	6	0.41041
WNT5A	6	0.378481
YKT6	6	0.349744
KIT	6	0.332409
PLXNA3	6	0.302301
FBXO45	6	0.273016
CLSTN3	6	0.257499
GRM5	6	0.255361
LGI1	6	0.25106
CDH11	6	0.246308
PLXNA2	6	0.24376
TSKU	6	0.229791
SLC17A7	5	0.636853
NR4A3	5	0.601717
EPHA5	5	0.572725
CELSR2	5	0.560454
BDNF	5	0.550058
SLIT3	5	0.540356
EFNB2	5	0.49597
PLXNA1	5	0.494572
RAPGEF2	5	0.485418
SLC8A2	5	0.459964
BTBD3	5	0.449751
KCNC4	5	0.426203
GOSR2	5	0.416035
KCNMB4	5	0.409931
RASGRF1	5	0.397196
PLXNC1	5	0.392877
SYNGR1	5	0.369628
EFNB3	5	0.369618
CAMK2B	5	0.358417
FLRT3	5	0.353728
SYP	5	0.349902
PTGER4	5	0.332777
EFNB1	5	0.325346
ARX	5	0.324976
PLCB1	5	0.296349
TACR2	5	0.27191
FLRT2	5	0.26931
FLOT1	5	0.264713
EFNA3	5	0.263376
NPTN	5	0.249605
LYN	5	0.248535
LHX3	5	0.248193
EFNA4	5	0.238398
DSCAM	5	0.234902
EIF2AK4	5	0.23062
TMEM106B	5	0.229087
NEUROD2	4	0.632705
SEMA4F	4	0.594962
UNC5A	4	0.556325
EXT1	4	0.553325
SYN2	4	0.552039
AP3S1	4	0.546635
POMZP3	4	0.545391
GRB2	4	0.543546
NPTX1	4	0.54209
L1CAM	4	0.531876
LRFN5	4	0.518661
WASL	4	0.502936
MAPK8IP3	4	0.48852
PTPRO	4	0.487165
CCK	4	0.480075
SOS1	4	0.474555
GRM7	4	0.473939
SLITRK4	4	0.471625
SLC9A6	4	0.468589
SLITRK1	4	0.457293
SHANK2	4	0.450053
LHX2	4	0.446719
CACNA1I	4	0.445969
SEMA5B	4	0.445115
LRFN4	4	0.442635
SCAMP5	4	0.438405
LIN7C	4	0.437239
BAIAP3	4	0.437156
PLK2	4	0.432054
AP3B2	4	0.425989
APBA1	4	0.416406
PTPRA	4	0.414489
SHISA7	4	0.413335
GRIN2B	4	0.413312
JPH3	4	0.411768
CRMP1	4	0.406517
ZNF280B	4	0.404957
SLITRK3	4	0.404299
RANBP9	4	0.401772
USP33	4	0.39877
CHL1	4	0.397884
PTPRN2	4	0.392937
CELSR3	4	0.380984
SPAST	4	0.379408
RAPSN	4	0.377305
ZNF280A	4	0.368745
TGFB2	4	0.344213
UCHL1	4	0.343644
ISPD	4	0.333649
LRFN2	4	0.31883
DBN1	4	0.317524
CASK	4	0.317415
LRFN3	4	0.315004
AP3M1	4	0.310166
SPTBN5	4	0.306762
SRF	4	0.299228
SHISA6	4	0.28858
VPS33A	4	0.276755
RGS14	4	0.275166
VPS33B	4	0.261987
CDH4	4	0.260304
ANK3	4	0.256714
AFG3L2	4	0.253301
UNC5D	4	0.238491
ISL1	4	0.238343
BCL11B	4	0.235936
SYTL5	4	0.231628
NLGN2	4	0.219343
SIPA1L1	4	0.217701
CACNA1H	4	0.211422
SHANK3	4	0.203216
RAPH1	3	0.594444
CLSTN2	3	0.570257
NUMBL	3	0.560537
GRIA3	3	0.551972
NTNG2	3	0.516939
GRIA2	3	0.513731
YWHAH	3	0.506484
SHC3	3	0.503508
LINGO1	3	0.502124
ARRB2	3	0.486105
LRRN2	3	0.483018
GNAQ	3	0.463372
VTI1A	3	0.456612
ATL1	3	0.442699
USP9X	3	0.433112
CRHBP	3	0.432726
RAB7A	3	0.430112
RTN4R	3	0.419928
HOMER1	3	0.414138
DPYSL4	3	0.405899
DAB1	3	0.402293
HRH1	3	0.398696
ATP8A2	3	0.396485
RIN1	3	0.394936
ITPKA	3	0.39471
NCK2	3	0.394535
LZTS1	3	0.379007
YWHAG	3	0.378759
GPM6B	3	0.372882
STX6	3	0.368277
JPH4	3	0.366839
NPY2R	3	0.361095
NUMB	3	0.360379
AP1G1	3	0.35077
NRGN	3	0.337597
SRGAP2	3	0.336867
PER2	3	0.335882
PPP3CA	3	0.33586
VDAC1	3	0.320198
VPS11	3	0.319964
MAP1S	3	0.318543
STX7	3	0.304204
CLSTN1	3	0.294834
AP1AR	3	0.288214
NPY	3	0.287035
NDN	3	0.275434
AP2A1	3	0.27143
BRSK2	3	0.270713
DSCAML1	3	0.269986
PICK1	3	0.268916
TAC1	3	0.24885
BBS4	3	0.244126
DAB2IP	3	0.236702
RAB10	3	0.232716
IGSF9	3	0.229092
ABHD6	3	0.226608
NFATC4	3	0.224212
CPEB3	3	0.219661
RIMS4	3	0.215695
SYT14	3	0.208664
RPH3AL	3	0.204769
NKD2	2	0.623382
RAB3D	2	0.611309
EMX1	2	0.556083
PRKCE	2	0.532305
ACTR3	2	0.528646
CACNG8	2	0.521171
AP2A2	2	0.501886
GRIP1	2	0.473909
SORT1	2	0.472724
CNTNAP1	2	0.470538
SSTR1	2	0.464128
RAB15	2	0.461725
SNAP91	2	0.461237
ARL6	2	0.45845
ATP1A3	2	0.4569
GABRA2	2	0.456167
SNX4	2	0.453586
VPS39	2	0.453472
CACNG3	2	0.453122
GPM6A	2	0.451532
AP2B1	2	0.449312
ACSL4	2	0.447999
RAB27B	2	0.445016
CSNK1D	2	0.42425
MYH9	2	0.420279
DYNC1I1	2	0.41806
GABRA5	2	0.416689
SHROOM2	2	0.41661
GLRB	2	0.411428
CNR1	2	0.408142
NSF	2	0.404281
RAPGEF4	2	0.401317
SEC23IP	2	0.399454
HTR2A	2	0.39346
MCFD2	2	0.392422
BTBD9	2	0.392377
ETV5	2	0.385726
DLGAP2	2	0.380552
GABRG2	2	0.380065
ADRA2A	2	0.379752
KIF3A	2	0.379737
NTRK3	2	0.374444
AP2M1	2	0.365483
TRAPPC6B	2	0.355219
PRKG1	2	0.355058
PPP6R1	2	0.351473
TRAPPC9	2	0.350216
WDR43	2	0.348526
TRAPPC2	2	0.345832
ADRA1A	2	0.340519
TMOD2	2	0.336211
KLHL12	2	0.334917
USP46	2	0.333706
OPA1	2	0.332784
ATCAY	2	0.331642
BNIP1	2	0.317127
CLASP1	2	0.311736
AP2S1	2	0.303572
VCPIP1	2	0.298755
FGFR1	2	0.292918
TRAPPC5	2	0.287863
BBS7	2	0.283892
VPS8	2	0.282379
GNAI3	2	0.281191
CA7	2	0.278993
RAB6A	2	0.272669
RAB1B	2	0.269845
HTT	2	0.266012
KIFAP3	2	0.251362
VAMP4	2	0.251155
KIF3B	2	0.248898
NEDD4	2	0.243655
RAB3B	2	0.241431
PPP1R9B	2	0.240172
STX12	2	0.23747
ZNF335	2	0.226916
RBFOX2	2	0.217452
PAFAH1B1	2	0.203803
SPINK8	2	0.20157
RAB5A	2	0.199318
CTNNA2	2	0.197986
RERE	2	0.197862
KLF7	2	0.197022
PTEN	2	0.169526
NEUROD1	1	0.655331
DLGAP1	1	0.630624
RTN4RL2	1	0.624009
MBP	1	0.597881
KCNN1	1	0.591425
HTR1A	1	0.585926
TBC1D24	1	0.581449
CPNE6	1	0.573482
VIP	1	0.57161
GPRIN1	1	0.565925
SEH1L	1	0.54367
GDAP1	1	0.533711
CAMSAP3	1	0.524274
CACNB1	1	0.52027
GABRB3	1	0.518834
SSTR2	1	0.518814
VPS13A	1	0.518544
PRKCG	1	0.517586
BSN	1	0.515702
CHMP1A	1	0.514872
APBA2	1	0.507529
KCNMB2	1	0.506273
EPHA6	1	0.501523
C1QL3	1	0.499492
SNX2	1	0.498168
UHMK1	1	0.496397
CORO1A	1	0.491033
SMAP1	1	0.485641
PTPRS	1	0.482161
SPRY2	1	0.479476
ATAD1	1	0.478824
SDAD1	1	0.478823
USP14	1	0.478593
APC	1	0.478268
AMPH	1	0.476042
EXOC6	1	0.474787
GABRB1	1	0.473365
BCL9	1	0.472908
WDR5	1	0.472513
FKBP1B	1	0.462123
CALU	1	0.46053
RASA1	1	0.446238
ARPC5	1	0.445868
GLS	1	0.442513
AAK1	1	0.440926
SLC4A10	1	0.440759
CAMSAP2	1	0.440335
CHCHD3	1	0.440305
CNTN1	1	0.440239
PCDH8	1	0.439825
CACNA1E	1	0.438537
CELF4	1	0.434838
CHRM1	1	0.434497
UBQLN2	1	0.43404
YWHAZ	1	0.432127
GABRA3	1	0.4304
UBE2Q1	1	0.430014
KCNH1	1	0.429342
DLG2	1	0.428776
RTN4RL1	1	0.428112
CAMK1	1	0.425516
ATXN10	1	0.424943
KCNQ5	1	0.42298
RAB8B	1	0.422478
IGF1	1	0.422403
UBE2B	1	0.417551
ACTB	1	0.416724
RHOT1	1	0.416388
MAPK9	1	0.414683
EGR3	1	0.414618
RXRA	1	0.411859
DLG3	1	0.407192
SPRY1	1	0.406548
HOMER2	1	0.406023
GIT1	1	0.404794
BHLHB9	1	0.404548
CLTB	1	0.40242
XK	1	0.399109
PRKACA	1	0.398939
CHMP7	1	0.395689
SCFD2	1	0.393104
ARPC2	1	0.393034
NPTX2	1	0.3882
HTR4	1	0.385802
CHRNA7	1	0.385795
ZFYVE27	1	0.382945
CACNB3	1	0.379883
LRRC4B	1	0.37969
TECPR1	1	0.378844
DCLK2	1	0.376395
GNAI1	1	0.376088
RAN	1	0.374716
CHRM3	1	0.373145
KIF3C	1	0.369391
SMYD3	1	0.369382
PSRC1	1	0.368438
TBC1D14	1	0.367709
DEAF1	1	0.367514
LRRC4	1	0.36449
DNAJC6	1	0.363328
GPR176	1	0.358408
SCYL2	1	0.357611
PTPRN	1	0.355788
RTN3	1	0.354315
ROCK2	1	0.352961
RAB9B	1	0.345993
TBC1D10B	1	0.34146
ESPL1	1	0.340548
ARPC4	1	0.338731
PLEKHO1	1	0.331779
RAB6B	1	0.3301
PCDHB2	1	0.329426
SMPD3	1	0.325539
GNA15	1	0.320315
VPS35	1	0.319014
HTR3B	1	0.317764
STMN3	1	0.317427
VPS26B	1	0.3159
TBC1D17	1	0.315647
WNT10B	1	0.3155
EPS15	1	0.314832
EXOC3L1	1	0.314311
DAPK1	1	0.314303
MARK2	1	0.313655
KCNQ2	1	0.313086
PIBF1	1	0.310861
SNX19	1	0.310433
ZNF219	1	0.30844
CDH2	1	0.302694
TBC1D10A	1	0.301379
ABR	1	0.299483
SKI	1	0.297957
EHD3	1	0.297576
EIF6	1	0.293008
RAB11FIP2	1	0.292017
GSK3A	1	0.287072
RAB14	1	0.286242
CHRM2	1	0.284816
RAB35	1	0.282727
FLOT2	1	0.276074
MSTO1	1	0.274676
HERC1	1	0.274549
TRIM27	1	0.271871
ALDH5A1	1	0.27156
GABBR2	1	0.270149
WIPI2	1	0.269118
NLGN4Y	1	0.26815
BICD2	1	0.267387
LHX6	1	0.266951
SST	1	0.266459
LRP8	1	0.263471
CRK	1	0.263109
TBC1D5	1	0.262961
IL13RA2	1	0.257026
LTBP4	1	0.256056
SPICE1	1	0.252324
PDYN	1	0.250397
DTNA	1	0.247861
GRIK4	1	0.23809
EPG5	1	0.237703
ACTR2	1	0.236929
NETO2	1	0.236287
ARPC3	1	0.23509
SOD1	1	0.234853
ARPC1A	1	0.230549
OGDH	1	0.22954
CSPG5	1	0.225516
NPHS1	1	0.223507
ARF4	1	0.222891
HOMER3	1	0.22156
SDCBP	1	0.21826
MAP1B	1	0.215653
MYOD1	1	0.212662
ADORA2B	1	0.211576
VPS41	1	0.211312
EEA1	1	0.205035
SNPH	1	0.203866
EXOC2	1	0.18635
EXOC6B	1	0.178865
CDON	1	0.171734
RAC1	1	0.171526
EXOC4	1	0.166934
P2RX2	1	0.164104
RYR1	1	0.161251
PTK2	1	0.158462
FARP1	1	0.151353
NR2E1	1	0.144644
KIDINS220	1	0.144559

## Sheet: Memory Subcortical (-)
Gene symbol	No. of genesets	Mean r-value	Function	Mems		Memw		Mots		Motw
RPL34	8	-0.543746	Memory-related			Kong, W., Mou, X., Liu, Q., Chen, Z., Vanderburg, C. R., Rogers, J. T., & Huang, X. (2009). Independent component analysis of Alzheimer’s DNA microarray gene expression data. Molecular Neurodegeneration, 4(1), 5. https://doi.org/10.1186/1750-1326-4-5
RPS12	8	-0.493964
RPS13	8	-0.466896	Memory-related			Wang, G., Zhang, Y., Chen, B., & Cheng, J. (2003). Preliminary studies on Alzheimer’s disease using cDNA microarrays. Mechanisms of Ageing and Development, 124(1), 115–124. https://doi.org/10.1016/S0047-6374(02)00188-4
RPS15A	8	-0.443062	Memory-related			Chadwick, W., Mitchell, N., Caroll, J., Zhou, Y., Park, S. S., Wang, L., ... & Martin, B. (2011). Amitriptyline-mediated cognitive enhancement in aged 3× Tg Alzheimer's disease mice is associated with neurogenesis and neurotrophic activity. PloS one, 6(6), e21660.
RPS29	8	-0.441044
RPL11	8	-0.439763	Memory-related			Oka, S., Leon, J., Sakumi, K., Ide, T., Kang, D., LaFerla, F. M., & Nakabeppu, Y. (2016). Human mitochondrial transcriptional factor A breaks the mitochondria-mediated vicious cycle in Alzheimer’s disease. Scientific Reports, 6(1), 37889. https://doi.org/10.1038/srep37889
RPL37A	8	-0.439085
RPL10	8	-0.437637	Memory-related			Zhang, Q., Ma, C., Gearing, M., Wang, P. G., Chin, L.-S., & Li, L. (2018). Integrated proteomics and network analysis identifies protein hubs and network alterations in Alzheimer’s disease. Acta Neuropathologica Communications, 6(1), 19. https://doi.org/10.1186/s40478-018-0524-2
RPS25	8	-0.435446	Memory-related			Winbush, A., Reed, D., Chang, P. L., Nuzhdin, S. V., Lyons, L. C., & Arbeitman, M. N. (2012). Identification of Gene Expression Changes Associated With Long-Term Memory of Courtship Rejection in Drosophila Males. G3: Genes, Genomes, Genetics, 2(11), 1437–1445. https://doi.org/10.1534/g3.112.004119
RPS27	8	-0.42605	Memory-related			Katz, I. K., & Lamprecht, R. (2015). Fear conditioning leads to alteration in specific genes expression in cortical and thalamic neurons that project to the lateral amygdala. Journal of Neurochemistry, 132(3), 313–326. https://doi.org/10.1111/jnc.12983
RPS6	8	-0.42352
RPL23A	8	-0.4216
RPS16	8	-0.410895
RPL39	8	-0.406084
RPS23	8	-0.402399
RPL30	8	-0.400245
RPL41	8	-0.392882
RPL5	8	-0.391508
RPS9	8	-0.385225
RPL13A	8	-0.383014
RPL13	8	-0.376009
RPS3A	8	-0.373856
RPS28	8	-0.373502
RPL37	8	-0.37231
RPS3	8	-0.369024
RPS10	8	-0.366416
RPL9	8	-0.362938
RPL21	8	-0.361461
RPS20	8	-0.361161
RPL18	8	-0.359629
RPL3	8	-0.357026
RPL19	8	-0.356981
RPS8	8	-0.356972
RPS19	8	-0.352757
RPL26	8	-0.350024
RPS11	8	-0.346659
RPS15	8	-0.340564
RPL7	8	-0.33835
RPS5	8	-0.333037
RPS26	8	-0.325455
RPSA	8	-0.320703
RPL12	8	-0.320399
RPLP1	8	-0.320046
RPS17	8	-0.316968
RPS4Y1	8	-0.312921
RPL18A	8	-0.311747
RPL17	8	-0.311626
RPL36A	8	-0.302178
RPS4X	8	-0.294303
RPL27	8	-0.293226
RPS18	8	-0.29251
RPS14	8	-0.291545
RPL7A	8	-0.287344
RPL4	8	-0.284206
RPL24	8	-0.271055
RPS27A	8	-0.265199
RPS7	8	-0.258212
RPL31	8	-0.256244
RPL8	8	-0.255208
RPL35	8	-0.246174
FAU	8	-0.244329
RPL35A	8	-0.234745
RPL23	8	-0.232239
RPLP0	8	-0.221978
RPL14	8	-0.22134
LPAR1	4	-0.599384
FA2H	4	-0.569961
PLP1	4	-0.557732
NKX6-2	4	-0.556754
CNTN2	4	-0.551413
CD9	4	-0.507647
TSPAN2	4	-0.505294
KCNJ10	4	-0.477579
DICER1	4	-0.398508
PARD3	4	-0.331708
EIF3E	4	-0.30514
SH3TC2	3	-0.544286
NDRG1	3	-0.534039
CNP	3	-0.493752
SIRT2	3	-0.481301
NKX2-2	3	-0.469005
OLIG2	3	-0.467536
EXOSC10	3	-0.463096
CHMP4A	3	-0.459917
LAMA2	3	-0.444441
UPF3A	3	-0.422582
POU3F2	3	-0.409317
UPF3B	3	-0.376234
CASC3	3	-0.365958
UPF1	3	-0.357404
MPP5	3	-0.344141
SMG5	3	-0.316478
DCP1A	3	-0.310395
SRP9	3	-0.308748
SMG1	3	-0.248674
CHMP4B	3	-0.238082
PPP2R2A	3	-0.218486
MAGOH	3	-0.216896
NKX6-1	2	-0.566817
BOK	2	-0.560125
SOX8	2	-0.558814
ISG20	2	-0.542725
RNH1	2	-0.535292
DLL1	2	-0.529397
PCBP2	2	-0.525288
OLIG1	2	-0.485109
SPCS2	2	-0.480759
SOX10	2	-0.480465
NUP54	2	-0.480371
CDK6	2	-0.477322
PNPT1	2	-0.448648
PAN2	2	-0.432903
PHGDH	2	-0.420441
GSTP1	2	-0.420259
EXOSC8	2	-0.41345
LSM5	2	-0.398467
LSM2	2	-0.391787
LAMB2	2	-0.390923
HDAC11	2	-0.367135
MXRA8	2	-0.362009
LSM6	2	-0.358567
ZFP36L1	2	-0.354687
SOX11	2	-0.353284
CNOT6	2	-0.347995
PAPD4	2	-0.334508
NUDT16	2	-0.332532
XRN1	2	-0.32534
MTPAP	2	-0.322237
POLR2G	2	-0.317364
ZFP36L2	2	-0.308749
DROSHA	2	-0.304655
LIN28B	2	-0.297922
EIF2B4	2	-0.295389
EIF3A	2	-0.29517
ZCCHC11	2	-0.291731
APOE	2	-0.278303
DCPS	2	-0.263883
LSM7	2	-0.263068
EIF3F	2	-0.25744
ZHX2	2	-0.254255
EIF3G	2	-0.247256
EDC3	2	-0.246115
ZC3H12A	2	-0.244881
MLH1	2	-0.244072
DIS3	2	-0.241124
ATM	2	-0.236372
ERN1	2	-0.231117
CNOT2	2	-0.228248
EIF3D	2	-0.224369
PRPF18	2	-0.223034
RPL38	2	-0.210444
RPL32	2	-0.19926
RPL10A	2	-0.194694
QDPR	1	-0.599044
MAL	1	-0.576791
PMP22	1	-0.576678
AMPD3	1	-0.576192
HMGB2	1	-0.571175
CARNS1	1	-0.555836
FGF1	1	-0.550412
UGT8	1	-0.547438
ATG4C	1	-0.537097
PHF8	1	-0.531784
CLDN11	1	-0.522505
ZNF24	1	-0.51944
EPHX2	1	-0.51165
ADA	1	-0.511404
KLK6	1	-0.510302
ERBB3	1	-0.508811
S100B	1	-0.505564
SOX2	1	-0.503946
AFMID	1	-0.50322
PDE9A	1	-0.50151
PDE8A	1	-0.501115
ABCG1	1	-0.500481
SERINC5	1	-0.498313
APOC1	1	-0.49477
JAM3	1	-0.493556
NT5C	1	-0.492003
CECR2	1	-0.491017
ATG3	1	-0.4896
MUTYH	1	-0.488151
SREBF1	1	-0.474256
QKI	1	-0.471435
LDLRAP1	1	-0.470444
GAL3ST1	1	-0.457565
PLLP	1	-0.45406
MLYCD	1	-0.453518
MTAP	1	-0.451067
PACS2	1	-0.450485
ATAD2	1	-0.449116
GALT	1	-0.448298
ANXA2	1	-0.443426
KLF15	1	-0.441916
NUP43	1	-0.440929
MAP2K3	1	-0.436708
NUDT5	1	-0.43652
RTP4	1	-0.43547
GSTZ1	1	-0.435452
ENPP4	1	-0.421592
TNF	1	-0.419122
LEF1	1	-0.41831
BMP6	1	-0.416914
TET1	1	-0.416786
ALDH6A1	1	-0.415821
NUP107	1	-0.41338
PCBD1	1	-0.411725
DDX3Y	1	-0.411505
CXCR4	1	-0.409361
SETDB1	1	-0.406869
TRAM1L1	1	-0.38804
PHF2	1	-0.386534
PDE7B	1	-0.374518
UPP1	1	-0.373593
ALDH4A1	1	-0.373244
RABGEF1	1	-0.371874
TSC1	1	-0.37178
POM121	1	-0.368608
LIF	1	-0.366661
METRN	1	-0.363815
UHRF1	1	-0.360502
PPARGC1A	1	-0.360152
NUP160	1	-0.359536
ABCF1	1	-0.358291
ASF1A	1	-0.355741
STAT3	1	-0.355185
PDE3A	1	-0.353077
DNER	1	-0.352791
MIER1	1	-0.345808
NUDT12	1	-0.341461
DNASE2	1	-0.337175
UHRF2	1	-0.336726
DUSP10	1	-0.335135
NTHL1	1	-0.332698
PNP	1	-0.331537
NUP210	1	-0.331338
CAT	1	-0.328775
HSD17B14	1	-0.325616
EIF2S2	1	-0.32405
ATAD2B	1	-0.321006
MTIF2	1	-0.31961
NT5M	1	-0.314374
ATG16L2	1	-0.31247
ILK	1	-0.311964
EIF3J	1	-0.303331
ACSBG1	1	-0.300815
CASP3	1	-0.299738
TPR	1	-0.29972
ICMT	1	-0.298723
AAAS	1	-0.296172
PDE11A	1	-0.295632
NUP188	1	-0.295397
AMDHD1	1	-0.294838
PDE10A	1	-0.292497
MTMR2	1	-0.288676
PRX	1	-0.287851
EIF3H	1	-0.287074
QPRT	1	-0.286946
PDE1B	1	-0.286793
EIF2D	1	-0.285713
ENPP1	1	-0.283357
ZNF396	1	-0.282366
DUT	1	-0.281262
NR1D1	1	-0.27821
NUP133	1	-0.274028
ALDH1L1	1	-0.272753
NT5E	1	-0.268171
ASRGL1	1	-0.264614
EIF2B5	1	-0.262326
EIF4H	1	-0.260241
EIF4E2	1	-0.255916
DCTPP1	1	-0.252721
NEIL1	1	-0.252066
HMGB1	1	-0.249924
EIF1	1	-0.247177
PRKAA1	1	-0.244229
COMT	1	-0.236977
TET2	1	-0.23606
AGT	1	-0.233783
HSD17B6	1	-0.230071
SSR2	1	-0.229917
PON3	1	-0.22934
H1F0	1	-0.226858
PRTFDC1	1	-0.218634
TRAM1	1	-0.212933
EIF3L	1	-0.211009
EIF4B	1	-0.208055
ANK1	1	-0.20347
MYO1C	1	-0.203111
SRP68	1	-0.200936
EIF4A2	1	-0.197613
