# Supplementary material for: Distinct Genetic Signatures of Cortical and Subcortical Regions Associated with Human Memory
Source: eNeuro. 2019 Dec 13;6(6):ENEURO.0283-19.2019. doi: 10.1523/ENEURO.0283-19.2019 (PMC6917897; doi:10.1523/ENEURO.0283-19.2019)
Supplement: Extended Data Table 4-2 — LEA output for the memory subcortical analysis, containing genes and the significant gene sets it is shared across (FDR < 0.05) from the LEA of memory subcortical analysis gene sets. The motor cortical and subcortical analyses are also included here. Download Table 4-2, XLSX file. [file sup_enu-eN-NWR-0283-19-s15.xlsx]

## Sheet: Memory subcortical +
Name	# genesets	GO_MYOTUBE_DIFFERENTIATION_signal	GO_FEAR_RESPONSE_signal	GO_EPHRIN_RECEPTOR_SIGNALING_PATHWAY_signal	GO_DENDRITE_DEVELOPMENT_signal	GO_DENDRITE_MORPHOGENESIS_signal	GO_CENTRAL_NERVOUS_SYSTEM_NEURON_AXONOGENESIS_signal	GO_CENTRAL_NERVOUS_SYSTEM_PROJECTION_NEURON_AXONOGENESIS_signal	GO_CENTRAL_NERVOUS_SYSTEM_NEURON_DEVELOPMENT_signal	GO_MOTOR_NEURON_AXON_GUIDANCE_signal	GO_NEURON_PROJECTION_GUIDANCE_signal	GO_NEURON_PROJECTION_DEVELOPMENT_signal	GO_NEURON_PROJECTION_MORPHOGENESIS_signal	GO_CELL_MORPHOGENESIS_INVOLVED_IN_NEURON_DIFFERENTIATION_signal	GO_IONOTROPIC_GLUTAMATE_RECEPTOR_SIGNALING_PATHWAY_signal	GO_GLUTAMATE_RECEPTOR_SIGNALING_PATHWAY_signal	GO_VESICLE_DOCKING_INVOLVED_IN_EXOCYTOSIS_signal	GO_NEURON_NEURON_SYNAPTIC_TRANSMISSION_signal	GO_SYNAPTIC_TRANSMISSION_GLUTAMATERGIC_signal	GO_REGULATION_OF_ALPHA_AMINO_3_HYDROXY_5_METHYL_4_ISOXAZOLE_PROPIONATE_SELECTIVE_GLUTAMATE_RECEPTOR_ACTIVITY_signal	GO_POSITIVE_REGULATION_OF_EXCITATORY_POSTSYNAPTIC_POTENTIAL_signal	GO_POSITIVE_REGULATION_OF_SYNAPTIC_TRANSMISSION_signal	GO_REGULATION_OF_LONG_TERM_NEURONAL_SYNAPTIC_PLASTICITY_signal	GO_REGULATION_OF_NEURONAL_SYNAPTIC_PLASTICITY_signal	GO_MODULATION_OF_SYNAPTIC_TRANSMISSION_signal	GO_REGULATION_OF_SYNAPSE_STRUCTURE_OR_ACTIVITY_signal	GO_REGULATION_OF_SYNAPTIC_PLASTICITY_signal	GO_SYNAPTIC_SIGNALING_signal	GO_ORGANELLE_MEMBRANE_FUSION_signal	GO_ORGANELLE_FUSION_signal	GO_POSITIVE_REGULATION_OF_REGULATED_SECRETORY_PATHWAY_signal	GO_POSITIVE_REGULATION_OF_CALCIUM_ION_DEPENDENT_EXOCYTOSIS_signal	GO_REGULATION_OF_REGULATED_SECRETORY_PATHWAY_signal	GO_REGULATION_OF_CALCIUM_ION_DEPENDENT_EXOCYTOSIS_signal	GO_CLATHRIN_MEDIATED_ENDOCYTOSIS_signal	GO_SYNAPTIC_VESICLE_ENDOCYTOSIS_signal	GO_SYNAPTIC_VESICLE_RECYCLING_signal	GO_ORGANELLE_LOCALIZATION_signal	GO_VESICLE_LOCALIZATION_signal	GO_CYTOSOLIC_TRANSPORT_signal	GO_REGULATION_OF_NEUROTRANSMITTER_LEVELS_signal	GO_SIGNAL_RELEASE_signal	GO_PRESYNAPTIC_PROCESS_INVOLVED_IN_SYNAPTIC_TRANSMISSION_signal	GO_CALCIUM_ION_REGULATED_EXOCYTOSIS_signal	GO_SYNAPTIC_VESICLE_LOCALIZATION_signal	GO_SYNAPTIC_VESICLE_CYCLE_signal	GO_REGULATION_OF_NEUROTRANSMITTER_TRANSPORT_signal	GO_REGULATION_OF_NEUROTRANSMITTER_SECRETION_signal	GO_REGULATION_OF_SYNAPTIC_VESICLE_EXOCYTOSIS_signal
BTBD9	2	0	0	0	0	0	0	0	0	0	0	0	0	0	0	0	0	0	0	0	0	0	0	0	0	0	0	0	0	0	0	0	0	0	0	0	0	0	0	0	0	0	0	0	0	0	0	0	0
AAK1	1	0	0	0	0	0	0	0	0	0	0	0	0	0	0	0	0	0	0	0	0	0	0	0	0	0	0	0	0	0	0	0	0	0	0	0	0	0	0	0	0	0	0	0	0	0	0	0	0
DNAJC6	1	0	0	0	0	0	0	0	0	0	0	0	0	0	0	0	0	0	0	0	0	0	0	0	0	0	0	0	0	0	0	0	0	0	0	0	0	0	0	0	0	0	0	0	0	0	0	0	0
UBQLN2	1	0	0	0	0	0	0	0	0	0	0	0	0	0	0	0	0	0	0	0	0	0	0	0	0	0	0	0	0	0	0	0	0	0	0	0	0	0	0	0	0	0	0	0	0	0	0	0	0
SMAP1	1	0	0	0	0	0	0	0	0	0	0	0	0	0	0	0	0	0	0	0	0	0	0	0	0	0	0	0	0	0	0	0	0	0	0	0	0	0	0	0	0	0	0	0	0	0	0	0	0
SCYL2	1	0	0	0	0	0	0	0	0	0	0	0	0	0	0	0	0	0	0	0	0	0	0	0	0	0	0	0	0	0	0	0	0	0	0	0	0	0	0	0	0	0	0	0	0	0	0	0	0
PAFAH1B1	2	0	0	0	0	0	0.203803	0.203803	0	0	0	0	0	0	0	0	0	0	0	0	0	0	0	0	0	0	0	0	0	0	0	0	0	0	0	0	0	0	0	0	0	0	0	0	0	0	0	0	0
PTK2	1	0	0	0	0	0	0.158462	0	0	0	0	0	0	0	0	0	0	0	0	0	0	0	0	0	0	0	0	0	0	0	0	0	0	0	0	0	0	0	0	0	0	0	0	0	0	0	0	0	0
NR2E1	1	0	0	0	0	0	0.144644	0	0	0	0	0	0	0	0	0	0	0	0	0	0	0	0	0	0	0	0	0	0	0	0	0	0	0	0	0	0	0	0	0	0	0	0	0	0	0	0	0	0
PTEN	2	0	0	0	0	0.169526	0.169526	0	0	0	0	0	0	0	0	0	0	0	0	0	0	0	0	0	0	0	0	0	0	0	0	0	0	0	0	0	0	0	0	0	0	0	0	0	0	0	0	0	0
FARP1	1	0	0	0	0	0.151353	0	0	0	0	0	0	0	0	0	0	0	0	0	0	0	0	0	0	0	0	0	0	0	0	0	0	0	0	0	0	0	0	0	0	0	0	0	0	0	0	0	0	0
KIDINS220	1	0	0	0	0	0.144559	0	0	0	0	0	0	0	0	0	0	0	0	0	0	0	0	0	0	0	0	0	0	0	0	0	0	0	0	0	0	0	0	0	0	0	0	0	0	0	0	0	0	0
RAC1	1	0	0	0	0	0.171526	0	0	0	0	0	0	0	0	0	0	0	0	0	0	0	0	0	0	0	0	0	0	0	0	0	0	0	0	0	0	0	0	0	0	0	0	0	0	0	0	0	0	0
MAP1B	1	0	0	0	0.215653	0	0	0	0	0	0	0	0	0	0	0	0	0	0	0	0	0	0	0	0	0	0	0	0	0	0	0	0	0	0	0	0	0	0	0	0	0	0	0	0	0	0	0	0
ARF4	1	0	0	0	0.222891	0	0	0	0	0	0	0	0	0	0	0	0	0	0	0	0	0	0	0	0	0	0	0	0	0	0	0	0	0	0	0	0	0	0	0	0	0	0	0	0	0	0	0	0
RBFOX2	2	0	0	0	0.217452	0.217452	0	0	0	0	0	0	0	0	0	0	0	0	0	0	0	0	0	0	0	0	0	0	0	0	0	0	0	0	0	0	0	0	0	0	0	0	0	0	0	0	0	0	0
KLF7	2	0	0	0	0.197022	0.197022	0	0	0	0	0	0	0	0	0	0	0	0	0	0	0	0	0	0	0	0	0	0	0	0	0	0	0	0	0	0	0	0	0	0	0	0	0	0	0	0	0	0	0
CTNNA2	2	0	0	0	0.197986	0.197986	0	0	0	0	0	0	0	0	0	0	0	0	0	0	0	0	0	0	0	0	0	0	0	0	0	0	0	0	0	0	0	0	0	0	0	0	0	0	0	0	0	0	0
RERE	2	0	0	0	0.197862	0.197862	0	0	0	0	0	0	0	0	0	0	0	0	0	0	0	0	0	0	0	0	0	0	0	0	0	0	0	0	0	0	0	0	0	0	0	0	0	0	0	0	0	0	0
SHANK3	4	0	0	0	0.203216	0.203216	0	0	0	0	0	0	0	0	0	0	0	0	0	0.203216	0.203216	0	0	0	0	0	0	0	0	0	0	0	0	0	0	0	0	0	0	0	0	0	0	0	0	0	0	0	0
OGDH	1	0	0	0	0	0	0	0	0.22954	0	0	0	0	0	0	0	0	0	0	0	0	0	0	0	0	0	0	0	0	0	0	0	0	0	0	0	0	0	0	0	0	0	0	0	0	0	0	0	0
GABRB1	1	0	0	0	0	0	0	0	0.473365	0	0	0	0	0	0	0	0	0	0	0	0	0	0	0	0	0	0	0	0	0	0	0	0	0	0	0	0	0	0	0	0	0	0	0	0	0	0	0	0
SLC4A10	1	0	0	0	0	0	0	0	0.440759	0	0	0	0	0	0	0	0	0	0	0	0	0	0	0	0	0	0	0	0	0	0	0	0	0	0	0	0	0	0	0	0	0	0	0	0	0	0	0	0
LHX6	1	0	0	0	0	0	0	0	0.266951	0	0	0	0	0	0	0	0	0	0	0	0	0	0	0	0	0	0	0	0	0	0	0	0	0	0	0	0	0	0	0	0	0	0	0	0	0	0	0	0
DCLK2	1	0	0	0	0	0	0	0	0.376395	0	0	0	0	0	0	0	0	0	0	0	0	0	0	0	0	0	0	0	0	0	0	0	0	0	0	0	0	0	0	0	0	0	0	0	0	0	0	0	0
NPY	3	0	0	0	0	0	0	0	0.287035	0	0	0.287035	0	0	0	0	0	0	0	0	0	0	0	0	0	0	0	0.287035	0	0	0	0	0	0	0	0	0	0	0	0	0	0	0	0	0	0	0	0	0
FGFR1	2	0	0	0	0	0	0	0	0.292918	0	0	0.292918	0	0	0	0	0	0	0	0	0	0	0	0	0	0	0	0	0	0	0	0	0	0	0	0	0	0	0	0	0	0	0	0	0	0	0	0	0
GNAQ	3	0	0	0	0	0	0	0	0.463372	0	0	0	0	0	0	0.463372	0	0	0	0	0	0	0	0	0	0	0	0.463372	0	0	0	0	0	0	0	0	0	0	0	0	0	0	0	0	0	0	0	0	0
HOMER1	3	0.414138	0	0	0	0	0	0	0	0	0	0	0	0	0	0.414138	0	0	0	0	0	0	0	0	0	0	0	0.414138	0	0	0	0	0	0	0	0	0	0	0	0	0	0	0	0	0	0	0	0	0
SSTR1	2	0	0	0	0	0	0	0	0	0	0	0	0	0	0	0.464128	0	0	0	0	0	0	0	0	0	0	0	0.464128	0	0	0	0	0	0	0	0	0	0	0	0	0	0	0	0	0	0	0	0	0
HOMER3	1	0	0	0	0	0	0	0	0	0	0	0	0	0	0	0.22156	0	0	0	0	0	0	0	0	0	0	0	0	0	0	0	0	0	0	0	0	0	0	0	0	0	0	0	0	0	0	0	0	0
HOMER2	1	0	0	0	0	0	0	0	0	0	0	0	0	0	0	0.406023	0	0	0	0	0	0	0	0	0	0	0	0	0	0	0	0	0	0	0	0	0	0	0	0	0	0	0	0	0	0	0	0	0
GRIK4	1	0	0	0	0	0	0	0	0	0	0	0	0	0	0	0.23809	0	0	0	0	0	0	0	0	0	0	0	0	0	0	0	0	0	0	0	0	0	0	0	0	0	0	0	0	0	0	0	0	0
GRIN2B	4	0	0	0.413312	0	0	0	0	0	0	0	0	0	0	0.413312	0.413312	0	0	0	0	0	0	0	0	0	0	0	0.413312	0	0	0	0	0	0	0	0	0	0	0	0	0	0	0	0	0	0	0	0	0
GRIA2	3	0	0	0	0	0	0	0	0	0	0	0	0	0	0.513731	0.513731	0	0	0	0	0	0	0	0	0	0	0	0.513731	0	0	0	0	0	0	0	0	0	0	0	0	0	0	0	0	0	0	0	0	0
GRIA3	3	0	0	0	0	0	0	0	0	0	0	0	0	0	0.551972	0.551972	0	0	0	0	0	0	0	0	0	0	0	0.551972	0	0	0	0	0	0	0	0	0	0	0	0	0	0	0	0	0	0	0	0	0
ATP1A3	2	0	0	0	0	0	0	0	0	0	0	0	0	0	0.4569	0.4569	0	0	0	0	0	0	0	0	0	0	0	0	0	0	0	0	0	0	0	0	0	0	0	0	0	0	0	0	0	0	0	0	0
GABRA2	2	0	0	0	0	0	0	0	0	0	0	0	0	0	0	0	0	0	0	0	0	0	0	0	0	0	0	0.456167	0	0	0	0	0	0	0	0	0	0	0	0	0.456167	0	0	0	0	0	0	0	0
ZNF219	1	0	0	0	0	0	0	0	0	0	0	0	0	0	0	0	0	0	0	0	0	0	0	0	0	0	0	0	0	0	0	0	0	0	0	0	0	0	0	0	0.30844	0	0	0	0	0	0	0	0
ALDH5A1	1	0	0	0	0	0	0	0	0	0	0	0	0	0	0	0	0	0	0	0	0	0	0	0	0	0	0	0	0	0	0	0	0	0	0	0	0	0	0	0	0.27156	0	0	0	0	0	0	0	0
TACR2	5	0	0	0	0	0	0	0	0	0	0	0	0	0	0	0	0	0	0	0	0	0.27191	0	0	0.27191	0	0	0.27191	0	0	0	0	0	0	0	0	0	0	0	0	0.27191	0.27191	0	0	0	0	0	0	0
PPFIA3	8	0	0	0	0	0	0	0	0	0	0	0	0	0	0	0	0	0	0	0	0	0	0	0.302395	0.302395	0.302395	0.302395	0.302395	0	0	0	0	0	0	0	0	0	0	0	0	0.302395	0.302395	0.302395	0	0	0	0	0	0
BRSK1	7	0	0	0	0	0	0	0	0	0	0	0.338351	0.338351	0.338351	0	0	0	0	0	0	0	0	0	0	0	0	0	0.338351	0	0	0	0	0	0	0	0	0	0	0	0	0.338351	0.338351	0.338351	0	0	0	0	0	0
LIN7C	4	0	0	0	0	0	0	0	0	0	0	0	0	0	0	0	0	0	0	0	0	0	0	0	0	0	0	0.437239	0	0	0	0	0	0	0	0	0	0	0	0	0.437239	0.437239	0.437239	0	0	0	0	0	0
BAIAP3	4	0	0	0	0	0	0	0	0	0	0	0	0	0	0	0	0	0	0	0	0	0	0	0	0	0	0	0.437156	0	0	0	0	0	0	0	0	0	0	0	0	0.437156	0.437156	0.437156	0	0	0	0	0	0
PTPRN2	4	0	0	0	0	0	0	0	0	0	0	0	0	0	0	0	0	0	0	0	0	0	0	0	0	0	0	0.392937	0	0	0	0	0	0	0	0	0	0	0	0	0.392937	0.392937	0.392937	0	0	0	0	0	0
SYN2	4	0	0	0	0	0	0	0	0	0	0	0	0	0	0	0	0	0	0	0	0	0	0	0	0	0	0	0.552039	0	0	0	0	0	0	0	0	0	0	0	0	0.552039	0.552039	0.552039	0	0	0	0	0	0
APBA1	4	0	0	0	0	0	0	0	0	0	0	0	0	0	0	0	0	0	0	0	0	0	0	0	0	0	0	0.416406	0	0	0	0	0	0	0	0	0	0	0	0	0.416406	0.416406	0.416406	0	0	0	0	0	0
CASK	4	0	0	0	0	0	0	0	0	0	0	0	0	0	0	0	0	0	0	0	0	0	0	0	0	0	0	0.317415	0	0	0	0	0	0	0	0	0	0	0	0	0.317415	0.317415	0.317415	0	0	0	0	0	0
RAB3A	25	0	0	0	0	0	0	0	0	0	0	0.39792	0.39792	0.39792	0	0	0	0	0	0	0	0	0	0.39792	0.39792	0.39792	0.39792	0.39792	0	0	0.39792	0	0.39792	0.39792	0	0	0.39792	0.39792	0.39792	0.39792	0.39792	0.39792	0.39792	0.39792	0.39792	0.39792	0.39792	0.39792	0.39792
UNC13B	26	0	0	0	0	0	0	0	0	0	0	0	0	0	0	0	0.378572	0.378572	0.378572	0	0	0.378572	0	0.378572	0.378572	0.378572	0.378572	0.378572	0	0	0.378572	0.378572	0.378572	0.378572	0	0	0	0.378572	0.378572	0.378572	0.378572	0.378572	0.378572	0.378572	0.378572	0.378572	0.378572	0.378572	0.378572
NLGN1	26	0	0	0	0	0	0	0	0	0	0	0.514126	0	0	0	0	0	0	0	0.514126	0.514126	0.514126	0	0	0.514126	0.514126	0.514126	0.514126	0	0	0.514126	0.514126	0.514126	0.514126	0	0	0	0.514126	0.514126	0.514126	0.514126	0.514126	0.514126	0.514126	0.514126	0.514126	0.514126	0.514126	0.514126
STXBP1	19	0	0	0	0	0	0	0	0	0	0	0.518976	0.518976	0.518976	0	0	0.518976	0	0	0	0	0	0	0	0.518976	0.518976	0.518976	0.518976	0	0	0.518976	0.518976	0.518976	0.518976	0	0	0	0	0	0	0.518976	0.518976	0.518976	0	0	0	0.518976	0.518976	0.518976
BRAF	11	0	0	0	0	0	0	0	0	0	0	0	0	0	0	0	0	0	0	0	0	0.320327	0	0	0.320327	0.320327	0.320327	0	0	0	0	0	0.320327	0.320327	0	0	0	0	0	0	0.320327	0	0	0	0	0	0.320327	0.320327	0.320327
PFN2	8	0	0	0	0	0	0	0	0	0	0	0	0	0	0	0	0	0	0	0	0	0	0	0	0.603174	0	0	0	0	0	0	0	0.603174	0.603174	0	0	0	0	0	0	0.603174	0	0	0	0	0	0.603174	0.603174	0.603174
SYN1	11	0	0	0	0	0	0	0	0	0	0	0	0	0	0	0	0	0	0	0	0	0	0	0	0.579408	0	0	0.579408	0	0	0	0	0.579408	0.579408	0	0	0	0	0	0	0.579408	0.579408	0.579408	0	0	0	0.579408	0.579408	0.579408
GRIK5	13	0	0	0	0	0	0	0	0	0	0	0	0	0	0.331579	0.331579	0	0.331579	0.331579	0	0	0	0	0	0.331579	0	0	0.331579	0	0	0	0	0.331579	0.331579	0	0	0	0	0	0	0.331579	0	0	0	0	0	0.331579	0.331579	0.331579
NAPA	13	0	0	0	0	0	0	0	0	0	0	0	0	0	0	0	0	0.493267	0.493267	0	0	0	0	0	0.493267	0	0	0.493267	0	0	0	0	0.493267	0.493267	0	0	0	0.493267	0.493267	0	0.493267	0	0	0	0	0	0.493267	0.493267	0.493267
KCNMB4	5	0	0	0	0	0	0	0	0	0	0	0	0	0	0	0	0	0	0	0	0	0	0	0	0.409931	0	0	0.409931	0	0	0	0	0	0	0	0	0	0	0	0	0.409931	0	0	0	0	0	0.409931	0.409931	0
KCNC4	5	0	0	0	0	0	0	0	0	0	0	0	0	0	0	0	0	0	0	0	0	0	0	0	0.426203	0	0	0.426203	0	0	0	0	0	0	0	0	0	0	0	0	0.426203	0	0	0	0	0	0.426203	0.426203	0
PTGER4	5	0	0	0	0	0	0	0	0	0	0	0	0	0	0	0	0	0	0	0	0	0.332777	0	0	0.332777	0	0	0	0	0	0	0	0	0	0	0	0	0	0	0	0.332777	0	0	0	0	0	0.332777	0.332777	0
GPM6B	3	0	0	0	0	0	0	0	0	0	0	0	0	0	0	0	0	0	0	0	0	0	0	0	0.372882	0	0	0	0	0	0	0	0	0	0	0	0	0	0	0	0.372882	0	0	0	0	0	0.372882	0	0
PER2	3	0	0	0	0	0	0	0	0	0	0	0	0	0	0	0	0	0	0	0	0	0	0	0	0.335882	0	0	0	0	0	0	0	0	0	0	0	0	0	0	0	0.335882	0	0	0	0	0	0.335882	0	0
MEF2C	10	0.304646	0	0	0	0	0	0	0	0	0	0	0	0.304646	0	0	0	0	0	0.304646	0	0	0	0	0.304646	0.304646	0.304646	0.304646	0	0	0	0	0	0	0	0	0	0	0	0	0.304646	0	0	0	0	0	0.304646	0.304646	0
CAMK2A	7	0	0	0	0	0	0	0	0	0	0	0	0	0	0	0	0	0	0	0	0	0	0	0.499652	0.499652	0.499652	0.499652	0	0	0	0	0	0	0	0	0	0	0	0	0	0.499652	0	0	0	0	0	0.499652	0.499652	0
GABRA5	2	0	0.416689	0	0	0	0	0	0	0	0	0	0	0	0	0	0	0	0	0	0	0	0	0	0	0	0	0.416689	0	0	0	0	0	0	0	0	0	0	0	0	0	0	0	0	0	0	0	0	0
VDAC1	3	0	0.320198	0	0	0	0	0	0	0	0	0	0	0	0	0	0	0.320198	0	0	0	0	0	0	0	0	0	0.320198	0	0	0	0	0	0	0	0	0	0	0	0	0	0	0	0	0	0	0	0	0
HTR1A	1	0	0.585926	0	0	0	0	0	0	0	0	0	0	0	0	0	0	0	0	0	0	0	0	0	0	0	0	0	0	0	0	0	0	0	0	0	0	0	0	0	0	0	0	0	0	0	0	0	0
DEAF1	1	0	0.367514	0	0	0	0	0	0	0	0	0	0	0	0	0	0	0	0	0	0	0	0	0	0	0	0	0	0	0	0	0	0	0	0	0	0	0	0	0	0	0	0	0	0	0	0	0	0
NPY2R	3	0	0.361095	0	0	0	0	0	0	0	0	0	0	0	0	0	0	0	0	0	0	0	0	0	0.361095	0	0	0.361095	0	0	0	0	0	0	0	0	0	0	0	0	0	0	0	0	0	0	0	0	0
GRM7	4	0	0.473939	0	0	0	0	0	0	0	0	0	0	0	0	0.473939	0	0	0	0	0	0	0	0	0.473939	0	0	0.473939	0	0	0	0	0	0	0	0	0	0	0	0	0	0	0	0	0	0	0	0	0
USP46	2	0	0.333706	0	0	0	0	0	0	0	0	0	0	0	0	0	0	0	0	0	0	0	0	0	0.333706	0	0	0	0	0	0	0	0	0	0	0	0	0	0	0	0	0	0	0	0	0	0	0	0
CLSTN3	6	0	0	0	0	0	0	0	0	0	0	0	0	0	0	0	0	0.257499	0.257499	0	0	0.257499	0	0	0.257499	0.257499	0	0.257499	0	0	0	0	0	0	0	0	0	0	0	0	0	0	0	0	0	0	0	0	0
CLSTN2	3	0	0	0	0	0	0	0	0	0	0	0	0	0	0	0	0	0	0	0	0	0.570257	0	0	0.570257	0.570257	0	0	0	0	0	0	0	0	0	0	0	0	0	0	0	0	0	0	0	0	0	0	0
CLSTN1	3	0	0	0	0	0	0	0	0	0	0	0	0	0	0	0	0	0	0	0	0	0.294834	0	0	0.294834	0.294834	0	0	0	0	0	0	0	0	0	0	0	0	0	0	0	0	0	0	0	0	0	0	0
RAPSN	4	0	0	0	0	0	0	0	0	0	0	0	0	0	0	0	0	0	0	0	0	0.377305	0	0	0.377305	0.377305	0	0.377305	0	0	0	0	0	0	0	0	0	0	0	0	0	0	0	0	0	0	0	0	0
ARRB2	3	0	0	0	0	0	0	0	0	0	0	0	0	0	0	0	0	0	0	0	0	0.486105	0	0	0.486105	0	0	0.486105	0	0	0	0	0	0	0	0	0	0	0	0	0	0	0	0	0	0	0	0	0
TAC1	3	0	0	0	0	0	0	0	0	0	0	0	0	0	0	0	0	0	0	0	0	0.24885	0	0	0.24885	0	0	0.24885	0	0	0	0	0	0	0	0	0	0	0	0	0	0	0	0	0	0	0	0	0
PRKCE	2	0	0	0	0	0	0	0	0	0	0	0	0	0	0	0	0	0	0	0	0	0.532305	0	0	0.532305	0	0	0	0	0	0	0	0	0	0	0	0	0	0	0	0	0	0	0	0	0	0	0	0
RAB3B	2	0	0	0	0	0	0	0	0	0	0	0	0	0	0	0	0	0	0	0	0	0.241431	0	0	0.241431	0	0	0	0	0	0	0	0	0	0	0	0	0	0	0	0	0	0	0	0	0	0	0	0
ADRA1A	2	0	0	0	0	0	0	0	0	0	0	0	0	0	0	0	0	0	0	0	0	0.340519	0	0	0.340519	0	0	0	0	0	0	0	0	0	0	0	0	0	0	0	0	0	0	0	0	0	0	0	0
CA7	2	0	0	0	0	0	0	0	0	0	0	0	0	0	0	0	0	0	0	0	0	0.278993	0	0	0.278993	0	0	0	0	0	0	0	0	0	0	0	0	0	0	0	0	0	0	0	0	0	0	0	0
DNM1	7	0	0	0.524258	0	0	0	0	0	0	0	0	0	0	0	0	0	0.524258	0	0	0	0.524258	0	0	0.524258	0	0	0.524258	0	0	0	0	0	0	0.524258	0	0	0	0	0	0	0	0	0	0	0	0	0	0
CNIH2	8	0	0	0	0	0	0	0	0	0	0	0	0	0	0	0	0	0.543109	0.543109	0.543109	0	0	0	0	0.543109	0	0	0.543109	0	0	0	0	0	0	0	0	0	0.543109	0.543109	0	0	0	0	0	0	0	0	0	0
CNIH3	7	0	0	0	0	0	0	0	0	0	0	0	0	0	0	0	0	0.564388	0.564388	0.564388	0	0	0	0	0.564388	0	0	0.564388	0	0	0	0	0	0	0	0	0	0.564388	0.564388	0	0	0	0	0	0	0	0	0	0
SLC17A7	5	0	0	0	0	0	0	0	0	0	0	0	0	0	0	0	0	0.636853	0.636853	0	0	0	0	0	0	0	0	0.636853	0	0	0	0	0	0	0	0	0	0	0	0	0.636853	0	0	0	0	0.636853	0	0	0
SHC3	3	0	0	0	0	0	0	0	0	0	0	0	0	0	0	0	0	0.503508	0.503508	0	0	0	0	0	0	0	0	0.503508	0	0	0	0	0	0	0	0	0	0	0	0	0	0	0	0	0	0	0	0	0
GABRG2	2	0	0	0	0	0	0	0	0	0	0	0	0	0	0	0	0	0.380065	0	0	0	0	0	0	0	0	0	0.380065	0	0	0	0	0	0	0	0	0	0	0	0	0	0	0	0	0	0	0	0	0
DLGAP2	2	0	0	0	0	0	0	0	0	0	0	0	0	0	0	0	0	0.380552	0	0	0	0	0	0	0	0	0	0.380552	0	0	0	0	0	0	0	0	0	0	0	0	0	0	0	0	0	0	0	0	0
GLRB	2	0	0	0	0	0	0	0	0	0	0	0	0	0	0	0	0	0.411428	0	0	0	0	0	0	0	0	0	0.411428	0	0	0	0	0	0	0	0	0	0	0	0	0	0	0	0	0	0	0	0	0
TMOD2	2	0	0	0	0	0	0	0	0	0	0	0	0	0	0	0	0	0.336211	0	0	0	0	0	0	0	0	0	0.336211	0	0	0	0	0	0	0	0	0	0	0	0	0	0	0	0	0	0	0	0	0
CRHBP	3	0	0	0	0	0	0	0	0	0	0	0	0	0	0	0	0	0.432726	0	0	0	0	0	0	0.432726	0	0	0.432726	0	0	0	0	0	0	0	0	0	0	0	0	0	0	0	0	0	0	0	0	0
HTR2A	2	0	0	0	0	0	0	0	0	0	0	0	0	0	0	0	0	0	0	0	0	0	0	0	0.39346	0	0	0.39346	0	0	0	0	0	0	0	0	0	0	0	0	0	0	0	0	0	0	0	0	0
PPP3CA	3	0.33586	0	0	0	0	0	0	0	0	0	0	0	0	0	0	0	0	0	0	0	0	0	0	0.33586	0	0	0.33586	0	0	0	0	0	0	0	0	0	0	0	0	0	0	0	0	0	0	0	0	0
SNAP91	2	0	0	0	0	0	0	0	0	0	0	0	0	0	0	0	0	0	0	0	0	0	0	0	0	0	0	0.461237	0	0	0	0	0	0	0	0	0	0	0	0	0	0	0	0	0	0	0	0	0
HTR4	1	0	0	0	0	0	0	0	0	0	0	0	0	0	0	0	0	0	0	0	0	0	0	0	0	0	0	0.385802	0	0	0	0	0	0	0	0	0	0	0	0	0	0	0	0	0	0	0	0	0
GLS	1	0	0	0	0	0	0	0	0	0	0	0	0	0	0	0	0	0	0	0	0	0	0	0	0	0	0	0.442513	0	0	0	0	0	0	0	0	0	0	0	0	0	0	0	0	0	0	0	0	0
GPR176	1	0	0	0	0	0	0	0	0	0	0	0	0	0	0	0	0	0	0	0	0	0	0	0	0	0	0	0.358408	0	0	0	0	0	0	0	0	0	0	0	0	0	0	0	0	0	0	0	0	0
PRKCG	1	0	0	0	0	0	0	0	0	0	0	0	0	0	0	0	0	0	0	0	0	0	0	0	0	0	0	0.517586	0	0	0	0	0	0	0	0	0	0	0	0	0	0	0	0	0	0	0	0	0
PDYN	1	0	0	0	0	0	0	0	0	0	0	0	0	0	0	0	0	0	0	0	0	0	0	0	0	0	0	0.250397	0	0	0	0	0	0	0	0	0	0	0	0	0	0	0	0	0	0	0	0	0
KCNMB2	1	0	0	0	0	0	0	0	0	0	0	0	0	0	0	0	0	0	0	0	0	0	0	0	0	0	0	0.506273	0	0	0	0	0	0	0	0	0	0	0	0	0	0	0	0	0	0	0	0	0
PCDHB2	1	0	0	0	0	0	0	0	0	0	0	0	0	0	0	0	0	0	0	0	0	0	0	0	0	0	0	0.329426	0	0	0	0	0	0	0	0	0	0	0	0	0	0	0	0	0	0	0	0	0
GABRB3	1	0	0	0	0	0	0	0	0	0	0	0	0	0	0	0	0	0	0	0	0	0	0	0	0	0	0	0.518834	0	0	0	0	0	0	0	0	0	0	0	0	0	0	0	0	0	0	0	0	0
DLGAP1	1	0	0	0	0	0	0	0	0	0	0	0	0	0	0	0	0	0	0	0	0	0	0	0	0	0	0	0.630624	0	0	0	0	0	0	0	0	0	0	0	0	0	0	0	0	0	0	0	0	0
GABRA3	1	0	0	0	0	0	0	0	0	0	0	0	0	0	0	0	0	0	0	0	0	0	0	0	0	0	0	0.4304	0	0	0	0	0	0	0	0	0	0	0	0	0	0	0	0	0	0	0	0	0
CHRM2	1	0	0	0	0	0	0	0	0	0	0	0	0	0	0	0	0	0	0	0	0	0	0	0	0	0	0	0.284816	0	0	0	0	0	0	0	0	0	0	0	0	0	0	0	0	0	0	0	0	0
CHRM3	1	0	0	0	0	0	0	0	0	0	0	0	0	0	0	0	0	0	0	0	0	0	0	0	0	0	0	0.373145	0	0	0	0	0	0	0	0	0	0	0	0	0	0	0	0	0	0	0	0	0
CHRM1	1	0	0	0	0	0	0	0	0	0	0	0	0	0	0	0	0	0	0	0	0	0	0	0	0	0	0	0.434497	0	0	0	0	0	0	0	0	0	0	0	0	0	0	0	0	0	0	0	0	0
CACNB1	1	0	0	0	0	0	0	0	0	0	0	0	0	0	0	0	0	0	0	0	0	0	0	0	0	0	0	0.52027	0	0	0	0	0	0	0	0	0	0	0	0	0	0	0	0	0	0	0	0	0
CACNB3	1	0	0	0	0	0	0	0	0	0	0	0	0	0	0	0	0	0	0	0	0	0	0	0	0	0	0	0.379883	0	0	0	0	0	0	0	0	0	0	0	0	0	0	0	0	0	0	0	0	0
MBP	1	0	0	0	0	0	0	0	0	0	0	0	0	0	0	0	0	0	0	0	0	0	0	0	0	0	0	0.597881	0	0	0	0	0	0	0	0	0	0	0	0	0	0	0	0	0	0	0	0	0
NPTX2	1	0	0	0	0	0	0	0	0	0	0	0	0	0	0	0	0	0	0	0	0	0	0	0	0	0	0	0.3882	0	0	0	0	0	0	0	0	0	0	0	0	0	0	0	0	0	0	0	0	0
HTR3B	1	0	0	0	0	0	0	0	0	0	0	0	0	0	0	0	0	0	0	0	0	0	0	0	0	0	0	0.317764	0	0	0	0	0	0	0	0	0	0	0	0	0	0	0	0	0	0	0	0	0
PCDH8	1	0	0	0	0	0	0	0	0	0	0	0	0	0	0	0	0	0	0	0	0	0	0	0	0	0	0	0.439825	0	0	0	0	0	0	0	0	0	0	0	0	0	0	0	0	0	0	0	0	0
SST	1	0	0	0	0	0	0	0	0	0	0	0	0	0	0	0	0	0	0	0	0	0	0	0	0	0	0	0.266459	0	0	0	0	0	0	0	0	0	0	0	0	0	0	0	0	0	0	0	0	0
CPNE6	1	0	0	0	0	0	0	0	0	0	0	0	0	0	0	0	0	0	0	0	0	0	0	0	0	0	0	0.573482	0	0	0	0	0	0	0	0	0	0	0	0	0	0	0	0	0	0	0	0	0
BSN	1	0	0	0	0	0	0	0	0	0	0	0	0	0	0	0	0	0	0	0	0	0	0	0	0	0	0	0.515702	0	0	0	0	0	0	0	0	0	0	0	0	0	0	0	0	0	0	0	0	0
KCNQ2	1	0	0	0	0	0	0	0	0	0	0	0	0	0	0	0	0	0	0	0	0	0	0	0	0	0	0	0.313086	0	0	0	0	0	0	0	0	0	0	0	0	0	0	0	0	0	0	0	0	0
KCNQ5	1	0	0	0	0	0	0	0	0	0	0	0	0	0	0	0	0	0	0	0	0	0	0	0	0	0	0	0.42298	0	0	0	0	0	0	0	0	0	0	0	0	0	0	0	0	0	0	0	0	0
KCNN1	1	0	0	0	0	0	0	0	0	0	0	0	0	0	0	0	0	0	0	0	0	0	0	0	0	0	0	0.591425	0	0	0	0	0	0	0	0	0	0	0	0	0	0	0	0	0	0	0	0	0
EGR3	1	0	0	0	0	0	0	0	0	0	0	0	0	0	0	0	0	0	0	0	0	0	0	0	0	0	0	0.414618	0	0	0	0	0	0	0	0	0	0	0	0	0	0	0	0	0	0	0	0	0
DTNA	1	0	0	0	0	0	0	0	0	0	0	0	0	0	0	0	0	0	0	0	0	0	0	0	0	0	0	0.247861	0	0	0	0	0	0	0	0	0	0	0	0	0	0	0	0	0	0	0	0	0
PTPRS	1	0	0	0	0	0	0	0	0	0	0	0	0	0	0	0	0	0	0	0	0	0	0	0	0	0	0	0.482161	0	0	0	0	0	0	0	0	0	0	0	0	0	0	0	0	0	0	0	0	0
GABBR2	1	0	0	0	0	0	0	0	0	0	0	0	0	0	0	0	0	0	0	0	0	0	0	0	0	0	0	0.270149	0	0	0	0	0	0	0	0	0	0	0	0	0	0	0	0	0	0	0	0	0
APBA2	1	0	0	0	0	0	0	0	0	0	0	0	0	0	0	0	0	0	0	0	0	0	0	0	0	0	0	0.507529	0	0	0	0	0	0	0	0	0	0	0	0	0	0	0	0	0	0	0	0	0
AMPH	1	0	0	0	0	0	0	0	0	0	0	0	0	0	0	0	0	0	0	0	0	0	0	0	0	0	0	0.476042	0	0	0	0	0	0	0	0	0	0	0	0	0	0	0	0	0	0	0	0	0
RTN3	1	0	0	0	0	0	0	0	0	0	0	0	0	0	0	0	0	0	0	0	0	0	0	0	0	0	0	0.354315	0	0	0	0	0	0	0	0	0	0	0	0	0	0	0	0	0	0	0	0	0
CHRNA7	1	0	0	0	0	0	0	0	0	0	0	0	0	0	0	0	0	0	0	0	0	0	0	0	0	0	0	0.385795	0	0	0	0	0	0	0	0	0	0	0	0	0	0	0	0	0	0	0	0	0
CACNA1E	1	0	0	0	0	0	0	0	0	0	0	0	0	0	0	0	0	0	0	0	0	0	0	0	0	0	0	0.438537	0	0	0	0	0	0	0	0	0	0	0	0	0	0	0	0	0	0	0	0	0
DLG2	1	0	0	0	0	0	0	0	0	0	0	0	0	0	0	0	0	0	0	0	0	0	0	0	0	0	0	0.428776	0	0	0	0	0	0	0	0	0	0	0	0	0	0	0	0	0	0	0	0	0
DLG3	1	0	0	0	0	0	0	0	0	0	0	0	0	0	0	0	0	0	0	0	0	0	0	0	0	0	0	0.407192	0	0	0	0	0	0	0	0	0	0	0	0	0	0	0	0	0	0	0	0	0
GSK3A	1	0	0	0	0	0	0	0	0	0	0	0	0	0	0	0	0	0	0	0	0	0	0	0	0	0	0	0.287072	0	0	0	0	0	0	0	0	0	0	0	0	0	0	0	0	0	0	0	0	0
FLOT2	1	0	0	0	0	0	0	0	0	0	0	0	0	0	0	0	0	0	0	0	0	0	0	0	0	0	0	0.276074	0	0	0	0	0	0	0	0	0	0	0	0	0	0	0	0	0	0	0	0	0
SSTR2	1	0	0	0	0	0	0	0	0	0	0	0	0	0	0	0	0	0	0	0	0	0	0	0	0	0	0	0.518814	0	0	0	0	0	0	0	0	0	0	0	0	0	0	0	0	0	0	0	0	0
USP14	1	0	0	0	0	0	0	0	0	0	0	0	0	0	0	0	0	0	0	0	0	0	0	0	0	0	0	0.478593	0	0	0	0	0	0	0	0	0	0	0	0	0	0	0	0	0	0	0	0	0
GNA15	1	0	0	0	0	0	0	0	0	0	0	0	0	0	0	0	0	0	0	0	0	0	0	0	0	0	0	0.320315	0	0	0	0	0	0	0	0	0	0	0	0	0	0	0	0	0	0	0	0	0
NLGN2	4	0	0	0	0	0	0	0	0	0	0	0	0	0	0	0	0	0	0	0.219343	0.219343	0	0	0	0.219343	0.219343	0	0	0	0	0	0	0	0	0	0	0	0	0	0	0	0	0	0	0	0	0	0	0
CACNG8	2	0	0	0	0	0	0	0	0	0	0	0	0	0	0	0	0	0	0	0.521171	0	0	0	0	0.521171	0	0	0	0	0	0	0	0	0	0	0	0	0	0	0	0	0	0	0	0	0	0	0	0
CACNG3	2	0	0	0	0	0	0	0	0	0	0	0	0	0	0	0	0	0	0	0.453122	0	0	0	0	0.453122	0	0	0	0	0	0	0	0	0	0	0	0	0	0	0	0	0	0	0	0	0	0	0	0
PRKACA	1	0	0	0	0	0	0	0	0	0	0	0	0	0	0	0	0	0	0	0	0	0	0	0	0.398939	0	0	0	0	0	0	0	0	0	0	0	0	0	0	0	0	0	0	0	0	0	0	0	0
DAPK1	1	0	0	0	0	0	0	0	0	0	0	0	0	0	0	0	0	0	0	0	0	0	0	0	0.314303	0	0	0	0	0	0	0	0	0	0	0	0	0	0	0	0	0	0	0	0	0	0	0	0
NETO2	1	0	0	0	0	0	0	0	0	0	0	0	0	0	0	0	0	0	0	0	0	0	0	0	0.236287	0	0	0	0	0	0	0	0	0	0	0	0	0	0	0	0	0	0	0	0	0	0	0	0
ATAD1	1	0	0	0	0	0	0	0	0	0	0	0	0	0	0	0	0	0	0	0	0	0	0	0	0.478824	0	0	0	0	0	0	0	0	0	0	0	0	0	0	0	0	0	0	0	0	0	0	0	0
CSPG5	1	0	0	0	0	0	0	0	0	0	0	0	0	0	0	0	0	0	0	0	0	0	0	0	0.225516	0	0	0	0	0	0	0	0	0	0	0	0	0	0	0	0	0	0	0	0	0	0	0	0
CELF4	1	0	0	0	0	0	0	0	0	0	0	0	0	0	0	0	0	0	0	0	0	0	0	0	0.434838	0	0	0	0	0	0	0	0	0	0	0	0	0	0	0	0	0	0	0	0	0	0	0	0
LRP8	1	0	0	0	0	0	0	0	0	0	0	0	0	0	0	0	0	0	0	0	0	0	0	0	0.263471	0	0	0	0	0	0	0	0	0	0	0	0	0	0	0	0	0	0	0	0	0	0	0	0
NLGN4Y	1	0	0	0	0	0	0	0	0	0	0	0	0	0	0	0	0	0	0	0	0	0	0	0	0.26815	0	0	0	0	0	0	0	0	0	0	0	0	0	0	0	0	0	0	0	0	0	0	0	0
GNAI1	1	0	0	0	0	0	0	0	0	0	0	0	0	0	0	0	0	0	0	0	0	0	0	0	0.376088	0	0	0	0	0	0	0	0	0	0	0	0	0	0	0	0	0	0	0	0	0	0	0	0
NRXN1	14	0	0	0	0	0	0	0	0	0	0.253905	0.253905	0.253905	0.253905	0	0	0	0	0	0.253905	0.253905	0.253905	0	0	0.253905	0.253905	0	0.253905	0	0	0	0	0	0	0	0	0	0.253905	0.253905	0	0	0.253905	0	0	0	0.253905	0	0	0
NTRK3	2	0	0	0.374444	0	0	0	0	0	0	0	0	0	0	0	0	0	0	0	0	0	0	0	0	0	0.374444	0	0	0	0	0	0	0	0	0	0	0	0	0	0	0	0	0	0	0	0	0	0	0
LRRC4	1	0	0	0	0	0	0	0	0	0	0	0	0	0	0	0	0	0	0	0	0	0	0	0	0	0.36449	0	0	0	0	0	0	0	0	0	0	0	0	0	0	0	0	0	0	0	0	0	0	0
CDH2	1	0	0	0	0	0	0	0	0	0	0	0	0	0	0	0	0	0	0	0	0	0	0	0	0	0.302694	0	0	0	0	0	0	0	0	0	0	0	0	0	0	0	0	0	0	0	0	0	0	0
LRRC4B	1	0	0	0	0	0	0	0	0	0	0	0	0	0	0	0	0	0	0	0	0	0	0	0	0	0.37969	0	0	0	0	0	0	0	0	0	0	0	0	0	0	0	0	0	0	0	0	0	0	0
C1QL3	1	0	0	0	0	0	0	0	0	0	0	0	0	0	0	0	0	0	0	0	0	0	0	0	0	0.499492	0	0	0	0	0	0	0	0	0	0	0	0	0	0	0	0	0	0	0	0	0	0	0
CAMK1	1	0	0	0	0	0	0	0	0	0	0	0	0	0	0	0	0	0	0	0	0	0	0	0	0	0.425516	0	0	0	0	0	0	0	0	0	0	0	0	0	0	0	0	0	0	0	0	0	0	0
BHLHB9	1	0	0	0	0	0	0	0	0	0	0	0	0	0	0	0	0	0	0	0	0	0	0	0	0	0.404548	0	0	0	0	0	0	0	0	0	0	0	0	0	0	0	0	0	0	0	0	0	0	0
ETV5	2	0	0	0	0	0	0	0	0	0	0	0	0	0	0	0	0	0	0	0	0	0	0	0	0	0.385726	0	0.385726	0	0	0	0	0	0	0	0	0	0	0	0	0	0	0	0	0	0	0	0	0
RAPGEF2	5	0	0	0	0	0	0	0	0.485418	0	0	0.485418	0	0	0	0	0	0	0	0	0	0	0	0	0.485418	0.485418	0.485418	0	0	0	0	0	0	0	0	0	0	0	0	0	0	0	0	0	0	0	0	0	0
EIF2AK4	5	0	0	0	0	0	0	0	0	0	0	0.23062	0.23062	0	0	0	0	0	0	0	0	0	0	0	0.23062	0.23062	0.23062	0	0	0	0	0	0	0	0	0	0	0	0	0	0	0	0	0	0	0	0	0	0
SRF	4	0	0	0	0	0	0	0	0	0	0	0.299228	0	0	0	0	0	0	0	0	0	0	0	0	0.299228	0.299228	0.299228	0	0	0	0	0	0	0	0	0	0	0	0	0	0	0	0	0	0	0	0	0	0
SIPA1L1	4	0	0	0.217701	0	0	0	0	0	0	0	0	0	0	0	0	0	0	0	0	0	0	0	0	0.217701	0.217701	0.217701	0	0	0	0	0	0	0	0	0	0	0	0	0	0	0	0	0	0	0	0	0	0
NEUROD2	4	0	0.632705	0	0	0	0	0	0	0	0	0	0	0	0	0	0	0	0	0	0	0	0	0	0.632705	0.632705	0.632705	0	0	0	0	0	0	0	0	0	0	0	0	0	0	0	0	0	0	0	0	0	0
NFATC4	3	0	0	0	0	0	0	0	0	0	0	0	0	0	0	0	0	0	0	0	0	0	0	0	0.224212	0.224212	0.224212	0	0	0	0	0	0	0	0	0	0	0	0	0	0	0	0	0	0	0	0	0	0
CPEB3	3	0	0	0	0	0	0	0	0	0	0	0	0	0	0	0	0	0	0	0	0	0	0	0	0.219661	0.219661	0.219661	0	0	0	0	0	0	0	0	0	0	0	0	0	0	0	0	0	0	0	0	0	0
JPH4	3	0	0	0	0	0	0	0	0	0	0	0	0	0	0	0	0	0	0	0	0	0	0	0	0.366839	0.366839	0.366839	0	0	0	0	0	0	0	0	0	0	0	0	0	0	0	0	0	0	0	0	0	0
ITPKA	3	0	0	0	0	0	0	0	0	0	0	0	0	0	0	0	0	0	0	0	0	0	0	0	0.39471	0.39471	0.39471	0	0	0	0	0	0	0	0	0	0	0	0	0	0	0	0	0	0	0	0	0	0
PICK1	3	0	0	0	0	0	0	0	0	0	0	0	0	0	0	0	0	0	0	0	0	0	0	0	0.268916	0.268916	0.268916	0	0	0	0	0	0	0	0	0	0	0	0	0	0	0	0	0	0	0	0	0	0
LZTS1	3	0	0	0	0	0	0	0	0	0	0	0	0	0	0	0	0	0	0	0	0	0	0	0	0.379007	0.379007	0.379007	0	0	0	0	0	0	0	0	0	0	0	0	0	0	0	0	0	0	0	0	0	0
ABHD6	3	0	0	0	0	0	0	0	0	0	0	0	0	0	0	0	0	0	0	0	0	0	0	0	0.226608	0.226608	0.226608	0	0	0	0	0	0	0	0	0	0	0	0	0	0	0	0	0	0	0	0	0	0
NRGN	3	0	0	0	0	0	0	0	0	0	0	0	0	0	0	0	0	0	0	0	0	0	0	0	0.337597	0.337597	0.337597	0	0	0	0	0	0	0	0	0	0	0	0	0	0	0	0	0	0	0	0	0	0
RIN1	3	0	0	0	0	0	0	0	0	0	0	0	0	0	0	0	0	0	0	0	0	0	0	0	0.394936	0.394936	0.394936	0	0	0	0	0	0	0	0	0	0	0	0	0	0	0	0	0	0	0	0	0	0
HRH1	3	0	0	0	0	0	0	0	0	0	0	0	0	0	0	0	0	0	0	0	0	0	0	0	0.398696	0.398696	0.398696	0	0	0	0	0	0	0	0	0	0	0	0	0	0	0	0	0	0	0	0	0	0
YWHAG	3	0	0	0	0	0	0	0	0	0	0	0	0	0	0	0	0	0	0	0	0	0	0	0	0.378759	0.378759	0.378759	0	0	0	0	0	0	0	0	0	0	0	0	0	0	0	0	0	0	0	0	0	0
YWHAH	3	0	0	0	0	0	0	0	0	0	0	0	0	0	0	0	0	0	0	0	0	0	0	0	0.506484	0.506484	0.506484	0	0	0	0	0	0	0	0	0	0	0	0	0	0	0	0	0	0	0	0	0	0
SYNGAP1	7	0	0	0	0.582102	0	0	0	0	0	0	0.582102	0	0	0	0	0	0	0	0	0	0	0.582102	0.582102	0.582102	0.582102	0.582102	0	0	0	0	0	0	0	0	0	0	0	0	0	0	0	0	0	0	0	0	0	0
RAB11A	8	0	0	0	0	0	0	0	0	0	0	0.372229	0	0	0	0	0	0	0	0	0	0	0.372229	0.372229	0.372229	0.372229	0.372229	0	0	0	0	0	0	0	0	0	0	0.372229	0.372229	0	0	0	0	0	0	0	0	0	0
KIT	6	0	0	0	0	0	0	0	0	0	0	0	0	0	0	0	0	0	0	0	0	0	0.332409	0.332409	0.332409	0.332409	0.332409	0	0	0	0	0	0	0	0	0	0	0.332409	0	0	0	0	0	0	0	0	0	0	0
SYNGR1	5	0	0	0	0	0	0	0	0	0	0	0	0	0	0	0	0	0	0	0	0	0	0.369628	0.369628	0.369628	0.369628	0.369628	0	0	0	0	0	0	0	0	0	0	0	0	0	0	0	0	0	0	0	0	0	0
SYP	5	0	0	0	0	0	0	0	0	0	0	0	0	0	0	0	0	0	0	0	0	0	0.349902	0.349902	0.349902	0.349902	0.349902	0	0	0	0	0	0	0	0	0	0	0	0	0	0	0	0	0	0	0	0	0	0
CAMK2B	5	0	0	0	0	0	0	0	0	0	0	0	0	0	0	0	0	0	0	0	0	0	0.358417	0.358417	0.358417	0.358417	0.358417	0	0	0	0	0	0	0	0	0	0	0	0	0	0	0	0	0	0	0	0	0	0
SLC8A2	5	0	0	0	0	0	0	0	0	0	0	0	0	0	0	0	0	0	0	0	0	0.459964	0	0.459964	0.459964	0.459964	0.459964	0	0	0	0	0	0	0	0	0	0	0	0	0	0	0	0	0	0	0	0	0	0
ARC	6	0	0	0	0	0	0	0	0	0	0	0	0	0	0	0	0	0	0	0.530294	0	0.530294	0	0.530294	0.530294	0.530294	0.530294	0	0	0	0	0	0	0	0	0	0	0	0	0	0	0	0	0	0	0	0	0	0
RASGRF1	5	0	0	0	0	0	0	0	0	0	0	0.397196	0	0	0	0	0	0	0	0	0	0	0	0.397196	0.397196	0.397196	0.397196	0	0	0	0	0	0	0	0	0	0	0	0	0	0	0	0	0	0	0	0	0	0
JPH3	4	0	0	0	0	0	0	0	0	0	0	0	0	0	0	0	0	0	0	0	0	0	0	0.411768	0.411768	0.411768	0.411768	0	0	0	0	0	0	0	0	0	0	0	0	0	0	0	0	0	0	0	0	0	0
DBN1	4	0	0	0	0	0	0	0	0	0	0	0	0	0	0	0	0	0	0	0	0	0	0	0.317524	0.317524	0.317524	0.317524	0	0	0	0	0	0	0	0	0	0	0	0	0	0	0	0	0	0	0	0	0	0
SHISA7	4	0	0	0	0	0	0	0	0	0	0	0	0	0	0	0	0	0	0	0	0	0	0	0.413335	0.413335	0.413335	0.413335	0	0	0	0	0	0	0	0	0	0	0	0	0	0	0	0	0	0	0	0	0	0
SHISA6	4	0	0	0	0	0	0	0	0	0	0	0	0	0	0	0	0	0	0	0	0	0	0	0.28858	0.28858	0.28858	0.28858	0	0	0	0	0	0	0	0	0	0	0	0	0	0	0	0	0	0	0	0	0	0
NETO1	7	0	0	0	0	0	0	0	0	0	0	0	0	0	0	0	0	0	0	0	0.44279	0.44279	0.44279	0.44279	0.44279	0.44279	0.44279	0	0	0	0	0	0	0	0	0	0	0	0	0	0	0	0	0	0	0	0	0	0
NPTN	5	0	0	0	0	0	0	0	0	0	0	0	0	0	0	0	0	0	0	0	0	0.249605	0.249605	0	0.249605	0.249605	0.249605	0	0	0	0	0	0	0	0	0	0	0	0	0	0	0	0	0	0	0	0	0	0
PLK2	4	0	0	0	0	0	0	0	0	0	0	0	0	0	0	0	0	0	0	0	0	0.432054	0	0	0.432054	0.432054	0.432054	0	0	0	0	0	0	0	0	0	0	0	0	0	0	0	0	0	0	0	0	0	0
SHANK2	4	0	0	0	0	0	0	0	0	0	0	0	0	0	0	0	0	0	0	0	0	0.450053	0	0	0.450053	0.450053	0.450053	0	0	0	0	0	0	0	0	0	0	0	0	0	0	0	0	0	0	0	0	0	0
RGS14	4	0	0	0	0	0	0	0	0	0	0	0	0	0	0	0	0	0	0	0	0	0.275166	0	0	0.275166	0.275166	0.275166	0	0	0	0	0	0	0	0	0	0	0	0	0	0	0	0	0	0	0	0	0	0
GRIK2	12	0	0.393184	0	0	0	0	0	0	0	0	0	0	0	0.393184	0.393184	0	0.393184	0.393184	0	0	0.393184	0.393184	0.393184	0.393184	0.393184	0.393184	0.393184	0	0	0	0	0	0	0	0	0	0	0	0	0	0	0	0	0	0	0	0	0
GRIN1	13	0	0	0.288789	0	0	0	0	0	0	0	0	0	0	0.288789	0.288789	0	0.288789	0.288789	0	0.288789	0.288789	0.288789	0.288789	0.288789	0.288789	0.288789	0.288789	0	0	0	0	0	0	0	0	0	0	0	0	0	0	0	0	0	0	0	0	0
GRIN2A	7	0	0	0	0	0	0	0	0	0	0	0	0	0	0.505685	0.505685	0	0	0	0	0	0.505685	0	0	0.505685	0.505685	0.505685	0.505685	0	0	0	0	0	0	0	0	0	0	0	0	0	0	0	0	0	0	0	0	0
GRIA1	8	0	0	0	0	0	0	0	0	0	0	0	0	0	0.517397	0.517397	0	0	0	0	0	0	0	0	0.517397	0.517397	0.517397	0.517397	0	0	0	0	0	0	0	0	0	0.517397	0.517397	0	0	0	0	0	0	0	0	0	0
GRM5	6	0	0	0	0	0	0	0	0	0	0	0	0	0	0	0.255361	0	0	0	0	0	0	0.255361	0	0.255361	0.255361	0.255361	0.255361	0	0	0	0	0	0	0	0	0	0	0	0	0	0	0	0	0	0	0	0	0
PTK2B	8	0	0	0	0	0	0	0	0	0	0	0.400256	0	0	0.400256	0.400256	0	0	0	0	0.400256	0.400256	0	0	0.400256	0.400256	0.400256	0	0	0	0	0	0	0	0	0	0	0	0	0	0	0	0	0	0	0	0	0	0
CHRNB2	10	0	0	0	0	0	0.262542	0.262542	0.262542	0	0	0.262542	0.262542	0.262542	0	0	0	0	0	0	0	0.262542	0	0	0.262542	0.262542	0	0.262542	0	0	0	0	0	0	0	0	0	0	0	0	0	0	0	0	0	0	0	0	0
EPHB2	15	0	0	0.529575	0.529575	0.529575	0.529575	0.529575	0.529575	0	0.529575	0.529575	0.529575	0.529575	0	0	0	0	0	0	0	0	0.529575	0.529575	0.529575	0.529575	0.529575	0	0	0	0	0	0	0	0	0	0	0	0	0	0	0	0	0	0	0	0	0	0
DCLK1	8	0	0	0	0.388076	0.388076	0.388076	0.388076	0.388076	0	0	0.388076	0.388076	0.388076	0	0	0	0	0	0	0	0	0	0	0	0	0	0	0	0	0	0	0	0	0	0	0	0	0	0	0	0	0	0	0	0	0	0	0
NFIB	7	0	0	0	0	0	0.496745	0.496745	0.496745	0	0.496745	0.496745	0.496745	0.496745	0	0	0	0	0	0	0	0	0	0	0	0	0	0	0	0	0	0	0	0	0	0	0	0	0	0	0	0	0	0	0	0	0	0	0
DCC	7	0	0	0	0	0	0.506065	0.506065	0.506065	0	0.506065	0.506065	0.506065	0.506065	0	0	0	0	0	0	0	0	0	0	0	0	0	0	0	0	0	0	0	0	0	0	0	0	0	0	0	0	0	0	0	0	0	0	0
TSKU	6	0	0	0	0	0	0.229791	0.229791	0.229791	0	0	0.229791	0.229791	0.229791	0	0	0	0	0	0	0	0	0	0	0	0	0	0	0	0	0	0	0	0	0	0	0	0	0	0	0	0	0	0	0	0	0	0	0
FBXO45	6	0	0	0	0	0	0.273016	0.273016	0.273016	0	0	0.273016	0.273016	0.273016	0	0	0	0	0	0	0	0	0	0	0	0	0	0	0	0	0	0	0	0	0	0	0	0	0	0	0	0	0	0	0	0	0	0	0
NR4A2	6	0	0	0	0	0	0.426841	0.426841	0.426841	0	0	0.426841	0.426841	0.426841	0	0	0	0	0	0	0	0	0	0	0	0	0	0	0	0	0	0	0	0	0	0	0	0	0	0	0	0	0	0	0	0	0	0	0
CDH11	6	0	0	0	0	0	0.246308	0.246308	0.246308	0	0	0.246308	0.246308	0.246308	0	0	0	0	0	0	0	0	0	0	0	0	0	0	0	0	0	0	0	0	0	0	0	0	0	0	0	0	0	0	0	0	0	0	0
EPHA4	9	0	0	0.482044	0	0	0.482044	0.482044	0.482044	0.482044	0.482044	0.482044	0.482044	0.482044	0	0	0	0	0	0	0	0	0	0	0	0	0	0	0	0	0	0	0	0	0	0	0	0	0	0	0	0	0	0	0	0	0	0	0
PLXNA4	8	0	0	0	0	0	0.423856	0.423856	0.423856	0.423856	0.423856	0.423856	0.423856	0.423856	0	0	0	0	0	0	0	0	0	0	0	0	0	0	0	0	0	0	0	0	0	0	0	0	0	0	0	0	0	0	0	0	0	0	0
SLIT2	8	0	0	0	0	0	0.250967	0.250967	0.250967	0.250967	0.250967	0.250967	0.250967	0.250967	0	0	0	0	0	0	0	0	0	0	0	0	0	0	0	0	0	0	0	0	0	0	0	0	0	0	0	0	0	0	0	0	0	0	0
RAB8A	11	0	0	0	0	0	0	0	0	0	0	0.287883	0.287883	0.287883	0	0	0.287883	0	0	0	0	0	0.287883	0.287883	0.287883	0.287883	0.287883	0	0.287883	0.287883	0	0	0	0	0	0	0	0	0	0	0	0	0	0	0	0	0	0	0
DLG4	13	0	0	0	0.312151	0.312151	0	0	0	0	0	0.312151	0.312151	0.312151	0	0	0	0	0	0	0.312151	0.312151	0.312151	0.312151	0.312151	0.312151	0.312151	0.312151	0	0	0	0	0	0	0	0	0	0	0	0	0	0	0	0	0	0	0	0	0
NLGN3	10	0	0	0	0	0	0	0	0	0	0	0.287165	0.287165	0.287165	0	0	0	0	0	0.287165	0.287165	0.287165	0	0	0.287165	0.287165	0.287165	0.287165	0	0	0	0	0	0	0	0	0	0	0	0	0	0	0	0	0	0	0	0	0
GSK3B	11	0.292257	0	0	0	0	0	0	0	0	0	0.292257	0.292257	0.292257	0	0	0	0	0	0	0.292257	0.292257	0	0.292257	0.292257	0.292257	0.292257	0.292257	0	0	0	0	0	0	0	0	0	0	0	0	0	0	0	0	0	0	0	0	0
BAIAP2	7	0	0	0	0.431786	0	0	0	0	0	0	0.431786	0.431786	0.431786	0	0	0	0	0	0	0	0	0	0	0.431786	0.431786	0.431786	0	0	0	0	0	0	0	0	0	0	0	0	0	0	0	0	0	0	0	0	0	0
PPP3CB	7	0	0	0	0	0	0	0	0	0	0	0.398066	0.398066	0.398066	0	0	0	0	0	0	0	0	0	0	0.398066	0.398066	0.398066	0	0	0	0	0	0	0	0	0	0	0	0	0	0	0	0	0.398066	0	0	0	0	0
EGR2	9	0	0	0	0	0	0	0	0	0.32281	0.32281	0.32281	0.32281	0.32281	0	0	0	0	0	0	0	0	0	0.32281	0.32281	0.32281	0.32281	0	0	0	0	0	0	0	0	0	0	0	0	0	0	0	0	0	0	0	0	0	0
TNR	8	0	0	0	0	0	0	0	0	0	0.381932	0.381932	0.381932	0.381932	0	0	0	0	0	0	0	0.381932	0	0	0.381932	0.381932	0.381932	0	0	0	0	0	0	0	0	0	0	0	0	0	0	0	0	0	0	0	0	0	0
MAPK1	9	0	0	0	0	0	0	0	0	0	0.403885	0.403885	0.403885	0.403885	0	0	0	0	0	0	0	0.403885	0	0	0.403885	0.403885	0.403885	0.403885	0	0	0	0	0	0	0	0	0	0	0	0	0	0	0	0	0	0	0	0	0
NCAM1	7	0	0	0	0	0	0	0	0	0	0.549599	0.549599	0.549599	0.549599	0	0	0	0	0	0	0	0	0	0	0.549599	0.549599	0.549599	0	0	0	0	0	0	0	0	0	0	0	0	0	0	0	0	0	0	0	0	0	0
FLOT1	5	0	0	0	0	0	0	0	0	0	0	0.264713	0.264713	0.264713	0	0	0	0	0	0	0	0.264713	0	0	0.264713	0	0	0	0	0	0	0	0	0	0	0	0	0	0	0	0	0	0	0	0	0	0	0	0
LGI1	6	0	0	0	0	0	0	0	0	0	0.25106	0.25106	0.25106	0.25106	0	0	0	0	0	0	0	0.25106	0	0	0.25106	0	0	0	0	0	0	0	0	0	0	0	0	0	0	0	0	0	0	0	0	0	0	0	0
SLITRK5	7	0	0	0	0.400616	0.400616	0	0	0	0	0	0.400616	0.400616	0.400616	0	0	0	0	0	0	0	0	0	0	0	0.400616	0	0.400616	0	0	0	0	0	0	0	0	0	0	0	0	0	0	0	0	0	0	0	0	0
SLC9A6	4	0	0	0	0.468589	0	0	0	0	0	0	0.468589	0.468589	0.468589	0	0	0	0	0	0	0	0	0	0	0	0	0	0	0	0	0	0	0	0	0	0	0	0	0	0	0	0	0	0	0	0	0	0	0
SRGAP2	3	0	0	0	0.336867	0	0	0	0	0	0	0.336867	0.336867	0	0	0	0	0	0	0	0	0	0	0	0	0	0	0	0	0	0	0	0	0	0	0	0	0	0	0	0	0	0	0	0	0	0	0	0
FYN	7	0	0	0.343479	0.343479	0.343479	0	0	0	0	0.343479	0.343479	0.343479	0.343479	0	0	0	0	0	0	0	0	0	0	0	0	0	0	0	0	0	0	0	0	0	0	0	0	0	0	0	0	0	0	0	0	0	0	0
PAK3	6	0	0	0.471089	0.471089	0.471089	0	0	0	0	0	0.471089	0.471089	0.471089	0	0	0	0	0	0	0	0	0	0	0	0	0	0	0	0	0	0	0	0	0	0	0	0	0	0	0	0	0	0	0	0	0	0	0
MAP6	6	0	0	0	0.436952	0.436952	0	0	0	0	0	0.436952	0.436952	0.436952	0	0	0	0	0	0	0	0	0	0	0	0	0	0	0	0	0	0	0	0	0	0	0	0.436952	0	0	0	0	0	0	0	0	0	0	0
HPRT1	6	0	0	0	0.440562	0.440562	0	0	0.440562	0	0	0.440562	0.440562	0.440562	0	0	0	0	0	0	0	0	0	0	0	0	0	0	0	0	0	0	0	0	0	0	0	0	0	0	0	0	0	0	0	0	0	0	0
MAP2	6	0	0	0	0.460267	0.460267	0	0	0.460267	0	0	0.460267	0.460267	0.460267	0	0	0	0	0	0	0	0	0	0	0	0	0	0	0	0	0	0	0	0	0	0	0	0	0	0	0	0	0	0	0	0	0	0	0
TMEM106B	5	0	0	0	0.229087	0.229087	0	0	0	0	0	0.229087	0.229087	0.229087	0	0	0	0	0	0	0	0	0	0	0	0	0	0	0	0	0	0	0	0	0	0	0	0	0	0	0	0	0	0	0	0	0	0	0
BTBD3	5	0	0	0	0.449751	0.449751	0	0	0	0	0	0.449751	0.449751	0.449751	0	0	0	0	0	0	0	0	0	0	0	0	0	0	0	0	0	0	0	0	0	0	0	0	0	0	0	0	0	0	0	0	0	0	0
CELSR2	5	0	0	0	0.560454	0.560454	0	0	0	0	0	0.560454	0.560454	0.560454	0	0	0	0	0	0	0	0	0	0	0	0	0	0	0	0	0	0	0	0	0	0	0	0	0	0	0	0	0	0	0	0	0	0	0
DSCAM	5	0	0	0	0.234902	0.234902	0	0	0	0	0	0.234902	0.234902	0.234902	0	0	0	0	0	0	0	0	0	0	0	0	0	0	0	0	0	0	0	0	0	0	0	0	0	0	0	0	0	0	0	0	0	0	0
MAPK8IP2	9	0	0.359411	0	0.359411	0.359411	0	0	0	0	0	0.359411	0.359411	0.359411	0	0	0	0	0	0.359411	0	0	0	0	0.359411	0	0	0.359411	0	0	0	0	0	0	0	0	0	0	0	0	0	0	0	0	0	0	0	0	0
MINK1	8	0	0	0	0.461743	0.461743	0	0	0	0	0	0.461743	0.461743	0.461743	0	0	0	0	0	0.461743	0	0	0	0	0.461743	0	0	0.461743	0	0	0	0	0	0	0	0	0	0	0	0	0	0	0	0	0	0	0	0	0
SHANK1	9	0	0	0	0.437954	0.437954	0	0	0	0	0	0.437954	0.437954	0.437954	0	0	0	0	0	0.437954	0.437954	0.437954	0	0	0.437954	0	0	0	0	0	0	0	0	0	0	0	0	0	0	0	0	0	0	0	0	0	0	0	0
APP	8	0	0	0	0.294823	0	0	0	0	0	0.294823	0.294823	0.294823	0.294823	0.294823	0.294823	0	0	0	0	0	0	0	0	0	0.294823	0	0	0	0	0	0	0	0	0	0	0	0	0	0	0	0	0	0	0	0	0	0	0
CDK5R1	8	0	0	0.472522	0	0	0	0	0	0	0.472522	0.472522	0.472522	0.472522	0.472522	0.472522	0	0	0	0	0	0	0	0	0	0	0	0.472522	0	0	0	0	0	0	0	0	0	0	0	0	0	0	0	0	0	0	0	0	0
DPYSL4	3	0	0	0	0	0	0	0	0	0	0.405899	0.405899	0.405899	0	0	0	0	0	0	0	0	0	0	0	0	0	0	0	0	0	0	0	0	0	0	0	0	0	0	0	0	0	0	0	0	0	0	0	0
ZNF335	2	0	0	0	0	0	0	0	0	0	0	0.226916	0.226916	0	0	0	0	0	0	0	0	0	0	0	0	0	0	0	0	0	0	0	0	0	0	0	0	0	0	0	0	0	0	0	0	0	0	0	0
CNTNAP1	2	0	0	0	0	0	0	0	0	0	0	0.470538	0.470538	0	0	0	0	0	0	0	0	0	0	0	0	0	0	0	0	0	0	0	0	0	0	0	0	0	0	0	0	0	0	0	0	0	0	0	0
EMX1	2	0	0	0	0	0	0	0	0	0	0	0.556083	0.556083	0	0	0	0	0	0	0	0	0	0	0	0	0	0	0	0	0	0	0	0	0	0	0	0	0	0	0	0	0	0	0	0	0	0	0	0
GPM6A	2	0	0	0	0	0	0	0	0	0	0	0.451532	0.451532	0	0	0	0	0	0	0	0	0	0	0	0	0	0	0	0	0	0	0	0	0	0	0	0	0	0	0	0	0	0	0	0	0	0	0	0
MAP1S	3	0	0	0	0	0	0	0	0	0	0	0.318543	0.318543	0	0	0	0	0	0	0	0	0	0	0	0	0	0	0	0	0	0	0	0	0	0	0	0	0.318543	0	0	0	0	0	0	0	0	0	0	0
SPAST	4	0	0	0	0	0	0	0	0	0	0	0.379408	0.379408	0.379408	0	0	0	0	0	0	0	0	0	0	0	0	0	0	0	0	0	0	0	0	0	0	0	0.379408	0	0	0	0	0	0	0	0	0	0	0
UCHL1	4	0	0	0	0	0	0	0	0	0	0	0.343644	0.343644	0.343644	0	0	0	0	0	0	0	0	0	0	0	0	0	0	0	0	0	0	0	0	0	0	0	0.343644	0	0	0	0	0	0	0	0	0	0	0
DAB2IP	3	0	0	0	0	0	0	0	0	0	0	0.236702	0.236702	0	0	0	0	0	0	0	0	0	0	0	0	0.236702	0	0	0	0	0	0	0	0	0	0	0	0	0	0	0	0	0	0	0	0	0	0	0
SLITRK1	4	0	0	0	0	0	0	0	0	0	0	0.457293	0.457293	0.457293	0	0	0	0	0	0	0	0	0	0	0	0.457293	0	0	0	0	0	0	0	0	0	0	0	0	0	0	0	0	0	0	0	0	0	0	0
SLITRK4	4	0	0	0	0	0	0	0	0	0	0	0.471625	0.471625	0.471625	0	0	0	0	0	0	0	0	0	0	0	0.471625	0	0	0	0	0	0	0	0	0	0	0	0	0	0	0	0	0	0	0	0	0	0	0
SLITRK3	4	0	0	0	0	0	0	0	0	0	0	0.404299	0.404299	0.404299	0	0	0	0	0	0	0	0	0	0	0	0.404299	0	0	0	0	0	0	0	0	0	0	0	0	0	0	0	0	0	0	0	0	0	0	0
FLRT2	5	0	0	0	0	0	0	0	0	0	0.26931	0.26931	0.26931	0.26931	0	0	0	0	0	0	0	0	0	0	0	0.26931	0	0	0	0	0	0	0	0	0	0	0	0	0	0	0	0	0	0	0	0	0	0	0
FLRT3	5	0	0	0	0	0	0	0	0	0	0.353728	0.353728	0.353728	0.353728	0	0	0	0	0	0	0	0	0	0	0	0.353728	0	0	0	0	0	0	0	0	0	0	0	0	0	0	0	0	0	0	0	0	0	0	0
BDNF	5	0	0	0	0	0	0	0	0	0	0.550058	0.550058	0.550058	0.550058	0	0	0	0	0	0	0	0	0	0	0	0.550058	0	0	0	0	0	0	0	0	0	0	0	0	0	0	0	0	0	0	0	0	0	0	0
EPHA7	6	0	0	0.41041	0	0	0	0	0	0	0.41041	0.41041	0.41041	0.41041	0	0	0	0	0	0	0	0	0	0	0	0.41041	0	0	0	0	0	0	0	0	0	0	0	0	0	0	0	0	0	0	0	0	0	0	0
WNT5A	6	0	0	0	0	0	0	0	0.378481	0	0.378481	0.378481	0.378481	0.378481	0	0	0	0	0	0	0	0	0	0	0	0.378481	0	0	0	0	0	0	0	0	0	0	0	0	0	0	0	0	0	0	0	0	0	0	0
PLXNA2	6	0	0	0	0	0	0	0	0	0.24376	0.24376	0.24376	0.24376	0.24376	0	0	0	0	0	0	0	0	0	0	0	0	0	0	0	0	0	0	0	0	0	0	0	0.24376	0	0	0	0	0	0	0	0	0	0	0
NR4A3	5	0	0	0	0	0	0	0	0	0	0.601717	0.601717	0.601717	0.601717	0	0	0	0	0	0	0	0	0	0	0	0	0	0	0	0	0	0	0	0	0	0	0	0.601717	0	0	0	0	0	0	0	0	0	0	0
SLIT1	8	0	0	0	0	0	0	0	0.580632	0.580632	0.580632	0.580632	0.580632	0.580632	0	0	0	0	0	0	0	0	0	0	0	0.580632	0	0	0	0	0	0	0	0	0	0	0	0.580632	0	0	0	0	0	0	0	0	0	0	0
CHN1	6	0	0	0.478961	0	0	0	0	0	0.478961	0.478961	0.478961	0.478961	0.478961	0	0	0	0	0	0	0	0	0	0	0	0	0	0	0	0	0	0	0	0	0	0	0	0	0	0	0	0	0	0	0	0	0	0	0
PLXNC1	5	0	0	0	0	0	0	0	0	0.392877	0.392877	0.392877	0.392877	0.392877	0	0	0	0	0	0	0	0	0	0	0	0	0	0	0	0	0	0	0	0	0	0	0	0	0	0	0	0	0	0	0	0	0	0	0
PLXNA1	5	0	0	0	0	0	0	0	0	0.494572	0.494572	0.494572	0.494572	0.494572	0	0	0	0	0	0	0	0	0	0	0	0	0	0	0	0	0	0	0	0	0	0	0	0	0	0	0	0	0	0	0	0	0	0	0
LHX3	5	0	0	0	0	0	0	0	0	0.248193	0.248193	0.248193	0.248193	0.248193	0	0	0	0	0	0	0	0	0	0	0	0	0	0	0	0	0	0	0	0	0	0	0	0	0	0	0	0	0	0	0	0	0	0	0
EPHA5	5	0	0	0.572725	0	0	0	0	0	0	0.572725	0.572725	0.572725	0.572725	0	0	0	0	0	0	0	0	0	0	0	0	0	0	0	0	0	0	0	0	0	0	0	0	0	0	0	0	0	0	0	0	0	0	0
EFNA4	5	0	0	0.238398	0	0	0	0	0	0	0.238398	0.238398	0.238398	0.238398	0	0	0	0	0	0	0	0	0	0	0	0	0	0	0	0	0	0	0	0	0	0	0	0	0	0	0	0	0	0	0	0	0	0	0
EFNB2	5	0	0	0.49597	0	0	0	0	0	0	0.49597	0.49597	0.49597	0.49597	0	0	0	0	0	0	0	0	0	0	0	0	0	0	0	0	0	0	0	0	0	0	0	0	0	0	0	0	0	0	0	0	0	0	0
EFNB1	5	0	0	0.325346	0	0	0	0	0	0	0.325346	0.325346	0.325346	0.325346	0	0	0	0	0	0	0	0	0	0	0	0	0	0	0	0	0	0	0	0	0	0	0	0	0	0	0	0	0	0	0	0	0	0	0
EFNB3	5	0	0	0.369618	0	0	0	0	0	0	0.369618	0.369618	0.369618	0.369618	0	0	0	0	0	0	0	0	0	0	0	0	0	0	0	0	0	0	0	0	0	0	0	0	0	0	0	0	0	0	0	0	0	0	0
EFNA3	5	0	0	0.263376	0	0	0	0	0	0	0.263376	0.263376	0.263376	0.263376	0	0	0	0	0	0	0	0	0	0	0	0	0	0	0	0	0	0	0	0	0	0	0	0	0	0	0	0	0	0	0	0	0	0	0
UNC5A	4	0	0	0	0	0	0	0	0	0	0.556325	0.556325	0.556325	0.556325	0	0	0	0	0	0	0	0	0	0	0	0	0	0	0	0	0	0	0	0	0	0	0	0	0	0	0	0	0	0	0	0	0	0	0
UNC5D	4	0	0	0	0	0	0	0	0	0	0.238491	0.238491	0.238491	0.238491	0	0	0	0	0	0	0	0	0	0	0	0	0	0	0	0	0	0	0	0	0	0	0	0	0	0	0	0	0	0	0	0	0	0	0
ISL1	4	0	0	0	0	0	0	0	0	0	0.238343	0.238343	0.238343	0.238343	0	0	0	0	0	0	0	0	0	0	0	0	0	0	0	0	0	0	0	0	0	0	0	0	0	0	0	0	0	0	0	0	0	0	0
L1CAM	4	0	0	0	0	0	0	0	0	0	0.531876	0.531876	0.531876	0.531876	0	0	0	0	0	0	0	0	0	0	0	0	0	0	0	0	0	0	0	0	0	0	0	0	0	0	0	0	0	0	0	0	0	0	0
CHL1	4	0	0	0	0	0	0	0	0	0	0.397884	0.397884	0.397884	0.397884	0	0	0	0	0	0	0	0	0	0	0	0	0	0	0	0	0	0	0	0	0	0	0	0	0	0	0	0	0	0	0	0	0	0	0
ZNF280A	4	0	0	0	0	0	0	0	0	0	0.368745	0.368745	0.368745	0.368745	0	0	0	0	0	0	0	0	0	0	0	0	0	0	0	0	0	0	0	0	0	0	0	0	0	0	0	0	0	0	0	0	0	0	0
ZNF280B	4	0	0	0	0	0	0	0	0	0	0.404957	0.404957	0.404957	0.404957	0	0	0	0	0	0	0	0	0	0	0	0	0	0	0	0	0	0	0	0	0	0	0	0	0	0	0	0	0	0	0	0	0	0	0
ISPD	4	0	0	0	0	0	0	0	0	0	0.333649	0.333649	0.333649	0.333649	0	0	0	0	0	0	0	0	0	0	0	0	0	0	0	0	0	0	0	0	0	0	0	0	0	0	0	0	0	0	0	0	0	0	0
SEMA5B	4	0	0	0	0	0	0	0	0	0	0.445115	0.445115	0.445115	0.445115	0	0	0	0	0	0	0	0	0	0	0	0	0	0	0	0	0	0	0	0	0	0	0	0	0	0	0	0	0	0	0	0	0	0	0
CDH4	4	0	0	0	0	0	0	0	0	0	0.260304	0.260304	0.260304	0.260304	0	0	0	0	0	0	0	0	0	0	0	0	0	0	0	0	0	0	0	0	0	0	0	0	0	0	0	0	0	0	0	0	0	0	0
LHX2	4	0	0	0	0	0	0	0	0	0	0.446719	0.446719	0.446719	0.446719	0	0	0	0	0	0	0	0	0	0	0	0	0	0	0	0	0	0	0	0	0	0	0	0	0	0	0	0	0	0	0	0	0	0	0
PTPRA	4	0	0	0	0	0	0	0	0	0	0.414489	0.414489	0.414489	0.414489	0	0	0	0	0	0	0	0	0	0	0	0	0	0	0	0	0	0	0	0	0	0	0	0	0	0	0	0	0	0	0	0	0	0	0
SOS1	4	0	0	0	0	0	0	0	0	0	0.474555	0.474555	0.474555	0.474555	0	0	0	0	0	0	0	0	0	0	0	0	0	0	0	0	0	0	0	0	0	0	0	0	0	0	0	0	0	0	0	0	0	0	0
SEMA4F	4	0	0	0	0	0	0	0	0	0	0.594962	0.594962	0.594962	0.594962	0	0	0	0	0	0	0	0	0	0	0	0	0	0	0	0	0	0	0	0	0	0	0	0	0	0	0	0	0	0	0	0	0	0	0
ANK3	4	0	0	0	0	0	0	0	0	0	0.256714	0.256714	0.256714	0.256714	0	0	0	0	0	0	0	0	0	0	0	0	0	0	0	0	0	0	0	0	0	0	0	0	0	0	0	0	0	0	0	0	0	0	0
MAPK8IP3	4	0	0	0	0	0	0	0	0	0	0.48852	0.48852	0.48852	0.48852	0	0	0	0	0	0	0	0	0	0	0	0	0	0	0	0	0	0	0	0	0	0	0	0	0	0	0	0	0	0	0	0	0	0	0
SPTBN5	4	0	0	0	0	0	0	0	0	0	0.306762	0.306762	0.306762	0.306762	0	0	0	0	0	0	0	0	0	0	0	0	0	0	0	0	0	0	0	0	0	0	0	0	0	0	0	0	0	0	0	0	0	0	0
BCL11B	4	0	0	0	0	0	0	0	0	0	0.235936	0.235936	0.235936	0.235936	0	0	0	0	0	0	0	0	0	0	0	0	0	0	0	0	0	0	0	0	0	0	0	0	0	0	0	0	0	0	0	0	0	0	0
EXT1	4	0	0	0	0	0	0	0	0	0	0.553325	0.553325	0.553325	0.553325	0	0	0	0	0	0	0	0	0	0	0	0	0	0	0	0	0	0	0	0	0	0	0	0	0	0	0	0	0	0	0	0	0	0	0
GRB2	4	0	0	0	0	0	0	0	0	0	0.543546	0.543546	0.543546	0.543546	0	0	0	0	0	0	0	0	0	0	0	0	0	0	0	0	0	0	0	0	0	0	0	0	0	0	0	0	0	0	0	0	0	0	0
PTPRO	4	0	0	0	0	0	0	0	0	0	0.487165	0.487165	0.487165	0.487165	0	0	0	0	0	0	0	0	0	0	0	0	0	0	0	0	0	0	0	0	0	0	0	0	0	0	0	0	0	0	0	0	0	0	0
RANBP9	4	0	0	0	0	0	0	0	0	0	0.401772	0.401772	0.401772	0.401772	0	0	0	0	0	0	0	0	0	0	0	0	0	0	0	0	0	0	0	0	0	0	0	0	0	0	0	0	0	0	0	0	0	0	0
CELSR3	4	0	0	0	0	0	0	0	0	0	0.380984	0.380984	0.380984	0.380984	0	0	0	0	0	0	0	0	0	0	0	0	0	0	0	0	0	0	0	0	0	0	0	0	0	0	0	0	0	0	0	0	0	0	0
TGFB2	4	0	0	0	0	0	0	0	0	0	0.344213	0.344213	0.344213	0.344213	0	0	0	0	0	0	0	0	0	0	0	0	0	0	0	0	0	0	0	0	0	0	0	0	0	0	0	0	0	0	0	0	0	0	0
USP33	4	0	0	0	0	0	0	0	0	0	0.39877	0.39877	0.39877	0.39877	0	0	0	0	0	0	0	0	0	0	0	0	0	0	0	0	0	0	0	0	0	0	0	0	0	0	0	0	0	0	0	0	0	0	0
CRMP1	4	0	0	0	0	0	0	0	0	0	0.406517	0.406517	0.406517	0.406517	0	0	0	0	0	0	0	0	0	0	0	0	0	0	0	0	0	0	0	0	0	0	0	0	0	0	0	0	0	0	0	0	0	0	0
PLXNA3	6	0	0	0	0	0	0	0	0.302301	0.302301	0.302301	0.302301	0.302301	0.302301	0	0	0	0	0	0	0	0	0	0	0	0	0	0	0	0	0	0	0	0	0	0	0	0	0	0	0	0	0	0	0	0	0	0	0
NRP1	7	0	0	0	0.479611	0	0	0	0.479611	0.479611	0.479611	0.479611	0.479611	0.479611	0	0	0	0	0	0	0	0	0	0	0	0	0	0	0	0	0	0	0	0	0	0	0	0	0	0	0	0	0	0	0	0	0	0	0
FEZF2	6	0	0	0	0.621535	0	0	0	0.621535	0	0.621535	0.621535	0.621535	0.621535	0	0	0	0	0	0	0	0	0	0	0	0	0	0	0	0	0	0	0	0	0	0	0	0	0	0	0	0	0	0	0	0	0	0	0
ARX	5	0	0	0	0	0	0	0	0.324976	0	0.324976	0.324976	0.324976	0.324976	0	0	0	0	0	0	0	0	0	0	0	0	0	0	0	0	0	0	0	0	0	0	0	0	0	0	0	0	0	0	0	0	0	0	0
SLIT3	5	0	0	0	0	0	0	0	0.540356	0	0.540356	0.540356	0.540356	0.540356	0	0	0	0	0	0	0	0	0	0	0	0	0	0	0	0	0	0	0	0	0	0	0	0	0	0	0	0	0	0	0	0	0	0	0
ALS2	7	0	0.458978	0	0	0	0	0	0	0	0	0.458978	0.458978	0.458978	0	0	0	0.458978	0.458978	0	0	0	0	0	0	0	0	0.458978	0	0	0	0	0	0	0	0	0	0	0	0	0	0	0	0	0	0	0	0	0
AFG3L2	4	0	0	0	0	0	0	0	0	0	0	0.253301	0.253301	0.253301	0	0	0	0	0	0	0	0	0	0	0	0	0	0	0	0.253301	0	0	0	0	0	0	0	0	0	0	0	0	0	0	0	0	0	0	0
NPTX1	4	0	0	0	0	0	0	0	0	0	0	0.54209	0.54209	0.54209	0	0	0	0	0	0	0	0	0	0	0	0	0	0.54209	0	0	0	0	0	0	0	0	0	0	0	0	0	0	0	0	0	0	0	0	0
LRFN3	4	0	0	0	0	0	0	0	0	0	0	0.315004	0.315004	0.315004	0	0	0	0	0	0	0	0	0	0	0	0	0	0.315004	0	0	0	0	0	0	0	0	0	0	0	0	0	0	0	0	0	0	0	0	0
LRFN2	4	0	0	0	0	0	0	0	0	0	0	0.31883	0.31883	0.31883	0	0	0	0	0	0	0	0	0	0	0	0	0	0.31883	0	0	0	0	0	0	0	0	0	0	0	0	0	0	0	0	0	0	0	0	0
LRFN5	4	0	0	0	0	0	0	0	0	0	0	0.518661	0.518661	0.518661	0	0	0	0	0	0	0	0	0	0	0	0	0	0.518661	0	0	0	0	0	0	0	0	0	0	0	0	0	0	0	0	0	0	0	0	0
LRFN4	4	0	0	0	0	0	0	0	0	0	0	0.442635	0.442635	0.442635	0	0	0	0	0	0	0	0	0	0	0	0	0	0.442635	0	0	0	0	0	0	0	0	0	0	0	0	0	0	0	0	0	0	0	0	0
RAPH1	3	0	0	0	0	0	0	0	0	0	0	0.594444	0.594444	0.594444	0	0	0	0	0	0	0	0	0	0	0	0	0	0	0	0	0	0	0	0	0	0	0	0	0	0	0	0	0	0	0	0	0	0	0
DSCAML1	3	0	0	0	0	0	0	0	0	0	0	0.269986	0.269986	0.269986	0	0	0	0	0	0	0	0	0	0	0	0	0	0	0	0	0	0	0	0	0	0	0	0	0	0	0	0	0	0	0	0	0	0	0
ATL1	3	0	0	0	0	0	0	0	0	0	0	0.442699	0.442699	0.442699	0	0	0	0	0	0	0	0	0	0	0	0	0	0	0	0	0	0	0	0	0	0	0	0	0	0	0	0	0	0	0	0	0	0	0
USP9X	3	0	0	0	0	0	0	0	0	0	0	0.433112	0.433112	0.433112	0	0	0	0	0	0	0	0	0	0	0	0	0	0	0	0	0	0	0	0	0	0	0	0	0	0	0	0	0	0	0	0	0	0	0
ATP8A2	3	0	0	0	0	0	0	0	0	0	0	0.396485	0.396485	0.396485	0	0	0	0	0	0	0	0	0	0	0	0	0	0	0	0	0	0	0	0	0	0	0	0	0	0	0	0	0	0	0	0	0	0	0
RTN4R	3	0	0	0	0	0	0	0	0	0	0	0.419928	0.419928	0.419928	0	0	0	0	0	0	0	0	0	0	0	0	0	0	0	0	0	0	0	0	0	0	0	0	0	0	0	0	0	0	0	0	0	0	0
BRSK2	3	0	0	0	0	0	0	0	0	0	0	0.270713	0.270713	0.270713	0	0	0	0	0	0	0	0	0	0	0	0	0	0	0	0	0	0	0	0	0	0	0	0	0	0	0	0	0	0	0	0	0	0	0
NDN	3	0	0	0	0	0	0	0	0	0	0	0.275434	0.275434	0.275434	0	0	0	0	0	0	0	0	0	0	0	0	0	0	0	0	0	0	0	0	0	0	0	0	0	0	0	0	0	0	0	0	0	0	0
NUMB	3	0	0	0	0	0	0	0	0	0	0	0.360379	0.360379	0.360379	0	0	0	0	0	0	0	0	0	0	0	0	0	0	0	0	0	0	0	0	0	0	0	0	0	0	0	0	0	0	0	0	0	0	0
LINGO1	3	0	0	0	0	0	0	0	0	0	0	0.502124	0.502124	0.502124	0	0	0	0	0	0	0	0	0	0	0	0	0	0	0	0	0	0	0	0	0	0	0	0	0	0	0	0	0	0	0	0	0	0	0
RAB10	3	0	0	0	0	0	0	0	0	0	0	0.232716	0.232716	0.232716	0	0	0	0	0	0	0	0	0	0	0	0	0	0	0	0	0	0	0	0	0	0	0	0	0	0	0	0	0	0	0	0	0	0	0
NUMBL	3	0	0	0	0	0	0	0	0	0	0	0.560537	0.560537	0.560537	0	0	0	0	0	0	0	0	0	0	0	0	0	0	0	0	0	0	0	0	0	0	0	0	0	0	0	0	0	0	0	0	0	0	0
NTNG2	3	0	0	0	0	0	0	0	0	0	0	0.516939	0.516939	0.516939	0	0	0	0	0	0	0	0	0	0	0	0	0	0	0	0	0	0	0	0	0	0	0	0	0	0	0	0	0	0	0	0	0	0	0
LRRN2	3	0	0	0	0	0	0	0	0	0	0	0.483018	0.483018	0.483018	0	0	0	0	0	0	0	0	0	0	0	0	0	0	0	0	0	0	0	0	0	0	0	0	0	0	0	0	0	0	0	0	0	0	0
CCK	4	0	0.480075	0	0	0	0	0	0	0	0	0.480075	0.480075	0.480075	0	0	0	0	0	0	0	0	0	0	0	0	0	0	0	0	0	0	0	0	0	0	0	0	0	0	0	0	0	0	0	0	0	0	0
SOD1	1	0	0	0	0	0	0	0	0	0	0	0	0	0.234853	0	0	0	0	0	0	0	0	0	0	0	0	0	0	0	0	0	0	0	0	0	0	0	0	0	0	0	0	0	0	0	0	0	0	0
RAPGEF4	2	0	0	0	0	0	0	0	0	0	0	0	0	0	0	0	0	0	0	0	0	0	0	0	0	0	0	0	0	0	0	0	0	0	0	0	0	0	0	0	0	0.401317	0	0.401317	0	0	0	0	0
SMPD3	1	0	0	0	0	0	0	0	0	0	0	0	0	0	0	0	0	0	0	0	0	0	0	0	0	0	0	0	0	0	0	0	0	0	0	0	0	0	0	0	0	0.325539	0	0	0	0	0	0	0
SNX19	1	0	0	0	0	0	0	0	0	0	0	0	0	0	0	0	0	0	0	0	0	0	0	0	0	0	0	0	0	0	0	0	0	0	0	0	0	0	0	0	0	0.310433	0	0	0	0	0	0	0
EXOC3L1	1	0	0	0	0	0	0	0	0	0	0	0	0	0	0	0	0	0	0	0	0	0	0	0	0	0	0	0	0	0	0	0	0	0	0	0	0	0	0	0	0	0.314311	0	0	0	0	0	0	0
NEUROD1	1	0	0	0	0	0	0	0	0	0	0	0	0	0	0	0	0	0	0	0	0	0	0	0	0	0	0	0	0	0	0	0	0	0	0	0	0	0	0	0	0	0.655331	0	0	0	0	0	0	0
RAB11FIP2	1	0	0	0	0	0	0	0	0	0	0	0	0	0	0	0	0	0	0	0	0	0	0	0	0	0	0	0	0	0	0	0	0	0	0	0	0	0	0	0	0	0.292017	0	0	0	0	0	0	0
PTPRN	1	0	0	0	0	0	0	0	0	0	0	0	0	0	0	0	0	0	0	0	0	0	0	0	0	0	0	0	0	0	0	0	0	0	0	0	0	0	0	0	0	0.355788	0	0	0	0	0	0	0
FKBP1B	1	0	0	0	0	0	0	0	0	0	0	0	0	0	0	0	0	0	0	0	0	0	0	0	0	0	0	0	0	0	0	0	0	0	0	0	0	0	0	0	0	0.462123	0	0	0	0	0	0	0
LTBP4	1	0	0	0	0	0	0	0	0	0	0	0	0	0	0	0	0	0	0	0	0	0	0	0	0	0	0	0	0	0	0	0	0	0	0	0	0	0	0	0	0	0.256056	0	0	0	0	0	0	0
UBE2Q1	1	0	0	0	0	0	0	0	0	0	0	0	0	0	0	0	0	0	0	0	0	0	0	0	0	0	0	0	0	0	0	0	0	0	0	0	0	0	0	0	0	0.430014	0	0	0	0	0	0	0
VIP	1	0	0	0	0	0	0	0	0	0	0	0	0	0	0	0	0	0	0	0	0	0	0	0	0	0	0	0	0	0	0	0	0	0	0	0	0	0	0	0	0	0.57161	0	0	0	0	0	0	0
EXOC6B	1	0	0	0	0	0	0	0	0	0	0	0	0	0	0	0	0.178865	0	0	0	0	0	0	0	0	0	0	0	0	0	0	0	0	0	0	0	0	0	0	0	0	0	0	0	0	0	0	0	0
EXOC4	1	0	0	0	0	0	0	0	0	0	0	0	0	0	0	0	0.166934	0	0	0	0	0	0	0	0	0	0	0	0	0	0	0	0	0	0	0	0	0	0	0	0	0	0	0	0	0	0	0	0
EXOC6	1	0	0	0	0	0	0	0	0	0	0	0	0	0	0	0	0.474787	0	0	0	0	0	0	0	0	0	0	0	0	0	0	0	0	0	0	0	0	0	0	0	0	0	0	0	0	0	0	0	0
EXOC2	1	0	0	0	0	0	0	0	0	0	0	0	0	0	0	0	0.18635	0	0	0	0	0	0	0	0	0	0	0	0	0	0	0	0	0	0	0	0	0	0	0	0	0	0	0	0	0	0	0	0
SNPH	1	0	0	0	0	0	0	0	0	0	0	0	0	0	0	0	0.203866	0	0	0	0	0	0	0	0	0	0	0	0	0	0	0	0	0	0	0	0	0	0	0	0	0	0	0	0	0	0	0	0
SCFD2	1	0	0	0	0	0	0	0	0	0	0	0	0	0	0	0	0.393104	0	0	0	0	0	0	0	0	0	0	0	0	0	0	0	0	0	0	0	0	0	0	0	0	0	0	0	0	0	0	0	0
RAB8B	1	0	0	0	0	0	0	0	0	0	0	0	0	0	0	0	0.422478	0	0	0	0	0	0	0	0	0	0	0	0	0	0	0	0	0	0	0	0	0	0	0	0	0	0	0	0	0	0	0	0
EEA1	1	0	0	0	0	0	0	0	0	0	0	0	0	0	0	0	0	0	0	0	0	0	0	0	0	0	0	0	0.205035	0	0	0	0	0	0	0	0	0	0	0	0	0	0	0	0	0	0	0	0
VPS41	1	0	0	0	0	0	0	0	0	0	0	0	0	0	0	0	0	0	0	0	0	0	0	0	0	0	0	0	0.211312	0	0	0	0	0	0	0	0	0	0	0	0	0	0	0	0	0	0	0	0
VTI1A	3	0	0	0	0	0	0	0	0	0	0	0	0	0	0	0	0	0	0	0	0	0	0	0	0	0	0	0	0.456612	0.456612	0	0	0	0	0	0	0	0	0	0.456612	0	0	0	0	0	0	0	0	0
STX6	3	0	0	0	0	0	0	0	0	0	0	0	0	0	0	0	0	0	0	0	0	0	0	0	0	0	0	0	0.368277	0.368277	0	0	0	0	0	0	0	0	0	0.368277	0	0	0	0	0	0	0	0	0
RAB7A	3	0	0	0	0	0	0	0	0	0	0	0	0	0	0	0	0	0	0	0	0	0	0	0	0	0	0	0	0.430112	0.430112	0	0	0	0	0	0	0	0	0	0.430112	0	0	0	0	0	0	0	0	0
VPS11	3	0	0	0	0	0	0	0	0	0	0	0	0	0	0	0	0.319964	0	0	0	0	0	0	0	0	0	0	0	0.319964	0.319964	0	0	0	0	0	0	0	0	0	0	0	0	0	0	0	0	0	0	0
VPS39	2	0	0	0	0	0	0	0	0	0	0	0	0	0	0	0	0	0	0	0	0	0	0	0	0	0	0	0	0.453472	0.453472	0	0	0	0	0	0	0	0	0	0	0	0	0	0	0	0	0	0	0
VAMP4	2	0	0	0	0	0	0	0	0	0	0	0	0	0	0	0	0	0	0	0	0	0	0	0	0	0	0	0	0.251155	0.251155	0	0	0	0	0	0	0	0	0	0	0	0	0	0	0	0	0	0	0
VPS8	2	0	0	0	0	0	0	0	0	0	0	0	0	0	0	0	0	0	0	0	0	0	0	0	0	0	0	0	0.282379	0.282379	0	0	0	0	0	0	0	0	0	0	0	0	0	0	0	0	0	0	0
STX12	2	0	0	0	0	0	0	0	0	0	0	0	0	0	0	0	0	0	0	0	0	0	0	0	0	0	0	0	0.23747	0.23747	0	0	0	0	0	0	0	0	0	0	0	0	0	0	0	0	0	0	0
GNAI3	2	0	0	0	0	0	0	0	0	0	0	0	0	0	0	0	0	0	0	0	0	0	0	0	0	0	0	0	0.281191	0.281191	0	0	0	0	0	0	0	0	0	0	0	0	0	0	0	0	0	0	0
NKD2	2	0	0	0	0	0	0	0	0	0	0	0	0	0	0	0	0	0	0	0	0	0	0	0	0	0	0	0	0.623382	0.623382	0	0	0	0	0	0	0	0	0	0	0	0	0	0	0	0	0	0	0
VCPIP1	2	0	0	0	0	0	0	0	0	0	0	0	0	0	0	0	0	0	0	0	0	0	0	0	0	0	0	0	0.298755	0.298755	0	0	0	0	0	0	0	0	0	0	0	0	0	0	0	0	0	0	0
BNIP1	2	0	0	0	0	0	0	0	0	0	0	0	0	0	0	0	0	0	0	0	0	0	0	0	0	0	0	0	0.317127	0.317127	0	0	0	0	0	0	0	0	0	0	0	0	0	0	0	0	0	0	0
VAMP7	7	0	0	0	0	0	0	0	0	0	0	0	0	0	0	0	0	0	0	0	0	0	0	0	0	0	0	0	0.362649	0.362649	0.362649	0	0.362649	0	0	0	0	0.362649	0.362649	0	0	0	0	0.362649	0	0	0	0	0
STX7	3	0	0	0	0	0	0	0	0	0	0	0	0	0	0	0	0	0	0	0	0	0	0	0	0	0	0	0	0.304204	0.304204	0	0	0	0	0	0	0	0.304204	0	0	0	0	0	0	0	0	0	0	0
OPA1	2	0	0	0	0	0	0	0	0	0	0	0	0	0	0	0	0	0	0	0	0	0	0	0	0	0	0	0	0	0.332784	0	0	0	0	0	0	0	0.332784	0	0	0	0	0	0	0	0	0	0	0
VPS33A	4	0	0	0	0	0	0	0	0	0	0	0	0	0	0	0	0.276755	0	0	0	0	0	0	0	0	0	0	0	0	0.276755	0	0	0	0	0	0	0	0.276755	0.276755	0	0	0	0	0	0	0	0	0	0
VPS33B	4	0	0	0	0	0	0	0	0	0	0	0	0	0	0	0	0.261987	0	0	0	0	0	0	0	0	0	0	0	0	0.261987	0	0	0	0	0	0	0	0.261987	0.261987	0	0	0	0	0	0	0	0	0	0
YKT6	6	0	0	0	0	0	0	0	0	0	0	0	0	0	0	0	0.349744	0	0	0	0	0	0	0	0	0	0	0	0.349744	0.349744	0	0	0	0	0	0	0	0.349744	0.349744	0.349744	0	0	0	0	0	0	0	0	0
GOSR2	5	0	0	0	0	0	0	0	0	0	0	0	0	0	0	0	0	0	0	0	0	0	0	0	0	0	0	0	0.416035	0.416035	0	0	0	0	0	0	0	0.416035	0.416035	0.416035	0	0	0	0	0	0	0	0	0
WIPI2	1	0	0	0	0	0	0	0	0	0	0	0	0	0	0	0	0	0	0	0	0	0	0	0	0	0	0	0	0	0.269118	0	0	0	0	0	0	0	0	0	0	0	0	0	0	0	0	0	0	0
TECPR1	1	0	0	0	0	0	0	0	0	0	0	0	0	0	0	0	0	0	0	0	0	0	0	0	0	0	0	0	0	0.378844	0	0	0	0	0	0	0	0	0	0	0	0	0	0	0	0	0	0	0
EPG5	1	0	0	0	0	0	0	0	0	0	0	0	0	0	0	0	0	0	0	0	0	0	0	0	0	0	0	0	0	0.237703	0	0	0	0	0	0	0	0	0	0	0	0	0	0	0	0	0	0	0
CHCHD3	1	0	0	0	0	0	0	0	0	0	0	0	0	0	0	0	0	0	0	0	0	0	0	0	0	0	0	0	0	0.440305	0	0	0	0	0	0	0	0	0	0	0	0	0	0	0	0	0	0	0
GDAP1	1	0	0	0	0	0	0	0	0	0	0	0	0	0	0	0	0	0	0	0	0	0	0	0	0	0	0	0	0	0.533711	0	0	0	0	0	0	0	0	0	0	0	0	0	0	0	0	0	0	0
SORT1	2	0.472724	0	0	0	0	0	0	0	0	0	0	0	0	0	0	0	0	0	0	0	0	0	0	0	0	0	0	0	0	0	0	0	0	0	0	0	0	0	0.472724	0	0	0	0	0	0	0	0	0
VPS35	1	0	0	0	0	0	0	0	0	0	0	0	0	0	0	0	0	0	0	0	0	0	0	0	0	0	0	0	0	0	0	0	0	0	0	0	0	0	0	0.319014	0	0	0	0	0	0	0	0	0
VPS26B	1	0	0	0	0	0	0	0	0	0	0	0	0	0	0	0	0	0	0	0	0	0	0	0	0	0	0	0	0	0	0	0	0	0	0	0	0	0	0	0.3159	0	0	0	0	0	0	0	0	0
EHD3	1	0	0	0	0	0	0	0	0	0	0	0	0	0	0	0	0	0	0	0	0	0	0	0	0	0	0	0	0	0	0	0	0	0	0	0	0	0	0	0.297576	0	0	0	0	0	0	0	0	0
CORO1A	1	0	0	0	0	0	0	0	0	0	0	0	0	0	0	0	0	0	0	0	0	0	0	0	0	0	0	0	0	0	0	0	0	0	0	0	0	0	0	0.491033	0	0	0	0	0	0	0	0	0
RAB6B	1	0	0	0	0	0	0	0	0	0	0	0	0	0	0	0	0	0	0	0	0	0	0	0	0	0	0	0	0	0	0	0	0	0	0	0	0	0	0	0.3301	0	0	0	0	0	0	0	0	0
VPS13A	1	0	0	0	0	0	0	0	0	0	0	0	0	0	0	0	0	0	0	0	0	0	0	0	0	0	0	0	0	0	0	0	0	0	0	0	0	0	0	0.518544	0	0	0	0	0	0	0	0	0
RAB14	1	0	0	0	0	0	0	0	0	0	0	0	0	0	0	0	0	0	0	0	0	0	0	0	0	0	0	0	0	0	0	0	0	0	0	0	0	0	0	0.286242	0	0	0	0	0	0	0	0	0
TRIM27	1	0	0	0	0	0	0	0	0	0	0	0	0	0	0	0	0	0	0	0	0	0	0	0	0	0	0	0	0	0	0	0	0	0	0	0	0	0	0	0.271871	0	0	0	0	0	0	0	0	0
TBC1D10A	1	0	0	0	0	0	0	0	0	0	0	0	0	0	0	0	0	0	0	0	0	0	0	0	0	0	0	0	0	0	0	0	0	0	0	0	0	0	0	0.301379	0	0	0	0	0	0	0	0	0
TBC1D10B	1	0	0	0	0	0	0	0	0	0	0	0	0	0	0	0	0	0	0	0	0	0	0	0	0	0	0	0	0	0	0	0	0	0	0	0	0	0	0	0.34146	0	0	0	0	0	0	0	0	0
SNX2	1	0	0	0	0	0	0	0	0	0	0	0	0	0	0	0	0	0	0	0	0	0	0	0	0	0	0	0	0	0	0	0	0	0	0	0	0	0	0	0.498168	0	0	0	0	0	0	0	0	0
EPS15	1	0	0	0	0	0	0	0	0	0	0	0	0	0	0	0	0	0	0	0	0	0	0	0	0	0	0	0	0	0	0	0	0	0	0	0	0	0	0	0.314832	0	0	0	0	0	0	0	0	0
RAB9B	1	0	0	0	0	0	0	0	0	0	0	0	0	0	0	0	0	0	0	0	0	0	0	0	0	0	0	0	0	0	0	0	0	0	0	0	0	0	0	0.345993	0	0	0	0	0	0	0	0	0
TBC1D14	1	0	0	0	0	0	0	0	0	0	0	0	0	0	0	0	0	0	0	0	0	0	0	0	0	0	0	0	0	0	0	0	0	0	0	0	0	0	0	0.367709	0	0	0	0	0	0	0	0	0
TBC1D17	1	0	0	0	0	0	0	0	0	0	0	0	0	0	0	0	0	0	0	0	0	0	0	0	0	0	0	0	0	0	0	0	0	0	0	0	0	0	0	0.315647	0	0	0	0	0	0	0	0	0
TBC1D5	1	0	0	0	0	0	0	0	0	0	0	0	0	0	0	0	0	0	0	0	0	0	0	0	0	0	0	0	0	0	0	0	0	0	0	0	0	0	0	0.262961	0	0	0	0	0	0	0	0	0
MYH9	2	0.420279	0	0	0	0	0	0	0	0	0	0	0	0	0	0	0	0	0	0	0	0	0	0	0	0	0	0	0	0	0	0	0	0	0	0	0	0.420279	0	0	0	0	0	0	0	0	0	0	0
WNT10B	1	0.3155	0	0	0	0	0	0	0	0	0	0	0	0	0	0	0	0	0	0	0	0	0	0	0	0	0	0	0	0	0	0	0	0	0	0	0	0	0	0	0	0	0	0	0	0	0	0	0
PLEKHO1	1	0.331779	0	0	0	0	0	0	0	0	0	0	0	0	0	0	0	0	0	0	0	0	0	0	0	0	0	0	0	0	0	0	0	0	0	0	0	0	0	0	0	0	0	0	0	0	0	0	0
SKI	1	0.297957	0	0	0	0	0	0	0	0	0	0	0	0	0	0	0	0	0	0	0	0	0	0	0	0	0	0	0	0	0	0	0	0	0	0	0	0	0	0	0	0	0	0	0	0	0	0	0
KCNH1	1	0.429342	0	0	0	0	0	0	0	0	0	0	0	0	0	0	0	0	0	0	0	0	0	0	0	0	0	0	0	0	0	0	0	0	0	0	0	0	0	0	0	0	0	0	0	0	0	0	0
SMYD3	1	0.369382	0	0	0	0	0	0	0	0	0	0	0	0	0	0	0	0	0	0	0	0	0	0	0	0	0	0	0	0	0	0	0	0	0	0	0	0	0	0	0	0	0	0	0	0	0	0	0
BCL9	1	0.472908	0	0	0	0	0	0	0	0	0	0	0	0	0	0	0	0	0	0	0	0	0	0	0	0	0	0	0	0	0	0	0	0	0	0	0	0	0	0	0	0	0	0	0	0	0	0	0
P2RX2	1	0.164104	0	0	0	0	0	0	0	0	0	0	0	0	0	0	0	0	0	0	0	0	0	0	0	0	0	0	0	0	0	0	0	0	0	0	0	0	0	0	0	0	0	0	0	0	0	0	0
CDON	1	0.171734	0	0	0	0	0	0	0	0	0	0	0	0	0	0	0	0	0	0	0	0	0	0	0	0	0	0	0	0	0	0	0	0	0	0	0	0	0	0	0	0	0	0	0	0	0	0	0
IGF1	1	0.422403	0	0	0	0	0	0	0	0	0	0	0	0	0	0	0	0	0	0	0	0	0	0	0	0	0	0	0	0	0	0	0	0	0	0	0	0	0	0	0	0	0	0	0	0	0	0	0
RYR1	1	0.161251	0	0	0	0	0	0	0	0	0	0	0	0	0	0	0	0	0	0	0	0	0	0	0	0	0	0	0	0	0	0	0	0	0	0	0	0	0	0	0	0	0	0	0	0	0	0	0
XK	1	0.399109	0	0	0	0	0	0	0	0	0	0	0	0	0	0	0	0	0	0	0	0	0	0	0	0	0	0	0	0	0	0	0	0	0	0	0	0	0	0	0	0	0	0	0	0	0	0	0
MYOD1	1	0.212662	0	0	0	0	0	0	0	0	0	0	0	0	0	0	0	0	0	0	0	0	0	0	0	0	0	0	0	0	0	0	0	0	0	0	0	0	0	0	0	0	0	0	0	0	0	0	0
NPHS1	1	0.223507	0	0	0	0	0	0	0	0	0	0	0	0	0	0	0	0	0	0	0	0	0	0	0	0	0	0	0	0	0	0	0	0	0	0	0	0	0	0	0	0	0	0	0	0	0	0	0
CLTB	1	0	0	0	0	0	0	0	0	0	0	0	0	0	0	0	0	0	0	0	0	0	0	0	0	0	0	0	0	0	0	0	0	0	0.40242	0	0	0	0	0	0	0	0	0	0	0	0	0	0
AP2A1	3	0	0	0.27143	0	0	0	0	0	0	0	0	0	0	0	0	0	0	0	0	0	0	0	0	0	0	0	0	0	0	0	0	0	0	0.27143	0	0	0	0	0.27143	0	0	0	0	0	0	0	0	0
AP2S1	2	0	0	0.303572	0	0	0	0	0	0	0	0	0	0	0	0	0	0	0	0	0	0	0	0	0	0	0	0	0	0	0	0	0	0	0.303572	0	0	0	0	0	0	0	0	0	0	0	0	0	0
AP2M1	2	0	0	0.365483	0	0	0	0	0	0	0	0	0	0	0	0	0	0	0	0	0	0	0	0	0	0	0	0	0	0	0	0	0	0	0.365483	0	0	0	0	0	0	0	0	0	0	0	0	0	0
AP2A2	2	0	0	0.501886	0	0	0	0	0	0	0	0	0	0	0	0	0	0	0	0	0	0	0	0	0	0	0	0	0	0	0	0	0	0	0.501886	0	0	0	0	0	0	0	0	0	0	0	0	0	0
AP2B1	2	0	0	0.449312	0	0	0	0	0	0	0	0	0	0	0	0	0	0	0	0	0	0	0	0	0	0	0	0	0	0	0	0	0	0	0.449312	0	0	0	0	0	0	0	0	0	0	0	0	0	0
LYN	5	0	0	0.248535	0	0	0	0	0	0	0	0.248535	0	0	0	0	0	0	0	0	0	0	0	0	0	0	0	0	0	0	0	0	0.248535	0	0	0	0	0.248535	0	0	0	0.248535	0	0	0	0	0	0	0
WASL	4	0	0	0.502936	0	0	0	0	0	0	0	0	0	0	0	0	0	0	0	0	0	0	0	0	0	0	0	0	0	0	0	0	0	0	0	0	0	0.502936	0.502936	0	0	0	0	0	0	0	0	0	0
ACTR3	2	0	0	0.528646	0	0	0	0	0	0	0	0	0	0	0	0	0	0	0	0	0	0	0	0	0	0	0	0	0	0	0	0	0	0	0	0	0	0.528646	0	0	0	0	0	0	0	0	0	0	0
ARPC1A	1	0	0	0.230549	0	0	0	0	0	0	0	0	0	0	0	0	0	0	0	0	0	0	0	0	0	0	0	0	0	0	0	0	0	0	0	0	0	0	0	0	0	0	0	0	0	0	0	0	0
ARPC4	1	0	0	0.338731	0	0	0	0	0	0	0	0	0	0	0	0	0	0	0	0	0	0	0	0	0	0	0	0	0	0	0	0	0	0	0	0	0	0	0	0	0	0	0	0	0	0	0	0	0
ARPC5	1	0	0	0.445868	0	0	0	0	0	0	0	0	0	0	0	0	0	0	0	0	0	0	0	0	0	0	0	0	0	0	0	0	0	0	0	0	0	0	0	0	0	0	0	0	0	0	0	0	0
ARPC2	1	0	0	0.393034	0	0	0	0	0	0	0	0	0	0	0	0	0	0	0	0	0	0	0	0	0	0	0	0	0	0	0	0	0	0	0	0	0	0	0	0	0	0	0	0	0	0	0	0	0
ARPC3	1	0	0	0.23509	0	0	0	0	0	0	0	0	0	0	0	0	0	0	0	0	0	0	0	0	0	0	0	0	0	0	0	0	0	0	0	0	0	0	0	0	0	0	0	0	0	0	0	0	0
ACTR2	1	0	0	0.236929	0	0	0	0	0	0	0	0	0	0	0	0	0	0	0	0	0	0	0	0	0	0	0	0	0	0	0	0	0	0	0	0	0	0	0	0	0	0	0	0	0	0	0	0	0
CRK	1	0	0	0.263109	0	0	0	0	0	0	0	0	0	0	0	0	0	0	0	0	0	0	0	0	0	0	0	0	0	0	0	0	0	0	0	0	0	0	0	0	0	0	0	0	0	0	0	0	0
ROCK2	1	0	0	0.352961	0	0	0	0	0	0	0	0	0	0	0	0	0	0	0	0	0	0	0	0	0	0	0	0	0	0	0	0	0	0	0	0	0	0	0	0	0	0	0	0	0	0	0	0	0
ACTB	1	0	0	0.416724	0	0	0	0	0	0	0	0	0	0	0	0	0	0	0	0	0	0	0	0	0	0	0	0	0	0	0	0	0	0	0	0	0	0	0	0	0	0	0	0	0	0	0	0	0
EPHA6	1	0	0	0.501523	0	0	0	0	0	0	0	0	0	0	0	0	0	0	0	0	0	0	0	0	0	0	0	0	0	0	0	0	0	0	0	0	0	0	0	0	0	0	0	0	0	0	0	0	0
GIT1	1	0	0	0.404794	0	0	0	0	0	0	0	0	0	0	0	0	0	0	0	0	0	0	0	0	0	0	0	0	0	0	0	0	0	0	0	0	0	0	0	0	0	0	0	0	0	0	0	0	0
SDCBP	1	0	0	0.21826	0	0	0	0	0	0	0	0	0	0	0	0	0	0	0	0	0	0	0	0	0	0	0	0	0	0	0	0	0	0	0	0	0	0	0	0	0	0	0	0	0	0	0	0	0
RASA1	1	0	0	0.446238	0	0	0	0	0	0	0	0	0	0	0	0	0	0	0	0	0	0	0	0	0	0	0	0	0	0	0	0	0	0	0	0	0	0	0	0	0	0	0	0	0	0	0	0	0
ATCAY	2	0	0	0	0	0	0	0	0	0	0	0.331642	0	0	0	0	0	0	0	0	0	0	0	0	0	0	0	0	0	0	0	0	0	0	0	0	0	0.331642	0	0	0	0	0	0	0	0	0	0	0
DAB1	3	0	0	0	0.402293	0	0	0	0	0	0	0.402293	0	0	0	0	0	0	0	0	0	0	0	0	0	0	0	0	0	0	0	0	0	0	0	0	0	0.402293	0	0	0	0	0	0	0	0	0	0	0
BBS4	3	0	0	0	0.244126	0	0	0	0	0	0	0.244126	0	0	0	0	0	0	0	0	0	0	0	0	0	0	0	0	0	0	0	0	0	0	0	0	0	0.244126	0	0	0	0	0	0	0	0	0	0	0
NCK2	3	0	0	0.394535	0.394535	0	0	0	0	0	0	0.394535	0	0	0	0	0	0	0	0	0	0	0	0	0	0	0	0	0	0	0	0	0	0	0	0	0	0	0	0	0	0	0	0	0	0	0	0	0
PRKG1	2	0	0	0	0.355058	0	0	0	0	0	0	0.355058	0	0	0	0	0	0	0	0	0	0	0	0	0	0	0	0	0	0	0	0	0	0	0	0	0	0	0	0	0	0	0	0	0	0	0	0	0
ACSL4	2	0	0	0	0.447999	0	0	0	0	0	0	0.447999	0	0	0	0	0	0	0	0	0	0	0	0	0	0	0	0	0	0	0	0	0	0	0	0	0	0	0	0	0	0	0	0	0	0	0	0	0
GRIP1	2	0	0	0	0.473909	0	0	0	0	0	0	0.473909	0	0	0	0	0	0	0	0	0	0	0	0	0	0	0	0	0	0	0	0	0	0	0	0	0	0	0	0	0	0	0	0	0	0	0	0	0
IGSF9	3	0	0	0	0.229092	0	0	0	0	0	0	0.229092	0	0	0	0	0	0	0	0	0	0	0	0	0	0.229092	0	0	0	0	0	0	0	0	0	0	0	0	0	0	0	0	0	0	0	0	0	0	0
NEDD4	2	0	0	0	0	0	0	0	0	0	0	0.243655	0	0	0	0	0	0	0	0	0	0	0	0	0	0.243655	0	0	0	0	0	0	0	0	0	0	0	0	0	0	0	0	0	0	0	0	0	0	0
STMN3	1	0	0	0	0	0	0	0	0	0	0	0.317427	0	0	0	0	0	0	0	0	0	0	0	0	0	0	0	0	0	0	0	0	0	0	0	0	0	0	0	0	0	0	0	0	0	0	0	0	0
ZFYVE27	1	0	0	0	0	0	0	0	0	0	0	0.382945	0	0	0	0	0	0	0	0	0	0	0	0	0	0	0	0	0	0	0	0	0	0	0	0	0	0	0	0	0	0	0	0	0	0	0	0	0
RAB35	1	0	0	0	0	0	0	0	0	0	0	0.282727	0	0	0	0	0	0	0	0	0	0	0	0	0	0	0	0	0	0	0	0	0	0	0	0	0	0	0	0	0	0	0	0	0	0	0	0	0
WDR5	1	0	0	0	0	0	0	0	0	0	0	0.472513	0	0	0	0	0	0	0	0	0	0	0	0	0	0	0	0	0	0	0	0	0	0	0	0	0	0	0	0	0	0	0	0	0	0	0	0	0
RTN4RL2	1	0	0	0	0	0	0	0	0	0	0	0.624009	0	0	0	0	0	0	0	0	0	0	0	0	0	0	0	0	0	0	0	0	0	0	0	0	0	0	0	0	0	0	0	0	0	0	0	0	0
RTN4RL1	1	0	0	0	0	0	0	0	0	0	0	0.428112	0	0	0	0	0	0	0	0	0	0	0	0	0	0	0	0	0	0	0	0	0	0	0	0	0	0	0	0	0	0	0	0	0	0	0	0	0
APC	1	0	0	0	0	0	0	0	0	0	0	0.478268	0	0	0	0	0	0	0	0	0	0	0	0	0	0	0	0	0	0	0	0	0	0	0	0	0	0	0	0	0	0	0	0	0	0	0	0	0
ATXN10	1	0	0	0	0	0	0	0	0	0	0	0.424943	0	0	0	0	0	0	0	0	0	0	0	0	0	0	0	0	0	0	0	0	0	0	0	0	0	0	0	0	0	0	0	0	0	0	0	0	0
HERC1	1	0	0	0	0	0	0	0	0	0	0	0.274549	0	0	0	0	0	0	0	0	0	0	0	0	0	0	0	0	0	0	0	0	0	0	0	0	0	0	0	0	0	0	0	0	0	0	0	0	0
UHMK1	1	0	0	0	0	0	0	0	0	0	0	0.496397	0	0	0	0	0	0	0	0	0	0	0	0	0	0	0	0	0	0	0	0	0	0	0	0	0	0	0	0	0	0	0	0	0	0	0	0	0
CALU	1	0	0	0	0	0	0	0	0	0	0	0.46053	0	0	0	0	0	0	0	0	0	0	0	0	0	0	0	0	0	0	0	0	0	0	0	0	0	0	0	0	0	0	0	0	0	0	0	0	0
RXRA	1	0	0	0	0	0	0	0	0	0	0	0.411859	0	0	0	0	0	0	0	0	0	0	0	0	0	0	0	0	0	0	0	0	0	0	0	0	0	0	0	0	0	0	0	0	0	0	0	0	0
GPRIN1	1	0	0	0	0	0	0	0	0	0	0	0.565925	0	0	0	0	0	0	0	0	0	0	0	0	0	0	0	0	0	0	0	0	0	0	0	0	0	0	0	0	0	0	0	0	0	0	0	0	0
TBC1D24	1	0	0	0	0	0	0	0	0	0	0	0.581449	0	0	0	0	0	0	0	0	0	0	0	0	0	0	0	0	0	0	0	0	0	0	0	0	0	0	0	0	0	0	0	0	0	0	0	0	0
CAMSAP2	1	0	0	0	0	0	0	0	0	0	0	0.440335	0	0	0	0	0	0	0	0	0	0	0	0	0	0	0	0	0	0	0	0	0	0	0	0	0	0	0	0	0	0	0	0	0	0	0	0	0
CAMSAP3	1	0	0	0	0	0	0	0	0	0	0	0.524274	0	0	0	0	0	0	0	0	0	0	0	0	0	0	0	0	0	0	0	0	0	0	0	0	0	0	0	0	0	0	0	0	0	0	0	0	0
CNTN1	1	0	0	0	0	0	0	0	0	0	0	0.440239	0	0	0	0	0	0	0	0	0	0	0	0	0	0	0	0	0	0	0	0	0	0	0	0	0	0	0	0	0	0	0	0	0	0	0	0	0
MAPK9	1	0	0	0	0	0	0	0	0	0	0	0.414683	0	0	0	0	0	0	0	0	0	0	0	0	0	0	0	0	0	0	0	0	0	0	0	0	0	0	0	0	0	0	0	0	0	0	0	0	0
PPP1R9B	2	0	0	0	0	0	0	0	0	0	0	0.240172	0	0	0	0	0	0	0	0	0	0	0	0	0.240172	0	0	0	0	0	0	0	0	0	0	0	0	0	0	0	0	0	0	0	0	0	0	0	0
CNR1	2	0	0	0	0	0	0	0	0	0	0	0.408142	0	0	0	0	0	0	0	0	0	0	0	0	0.408142	0	0	0	0	0	0	0	0	0	0	0	0	0	0	0	0	0	0	0	0	0	0	0	0
ARF1	11	0	0	0	0	0	0	0	0	0	0	0	0	0	0	0	0	0	0	0	0	0	0	0	0.470425	0.470425	0.470425	0	0	0	0.470425	0.470425	0.470425	0.470425	0	0	0	0.470425	0.470425	0.470425	0	0	0	0	0.470425	0	0	0	0
KCNB1	8	0	0	0	0	0	0	0	0	0	0	0	0	0	0	0.229528	0.229528	0	0	0	0	0	0	0	0.229528	0.229528	0.229528	0	0	0	0	0.229528	0.229528	0.229528	0	0	0	0	0	0	0	0	0	0	0	0	0	0	0
ABR	1	0	0	0	0	0	0	0	0	0	0	0	0	0	0	0	0	0	0	0	0	0	0	0	0	0	0	0	0	0	0	0	0.299483	0	0	0	0	0	0	0	0	0	0	0	0	0	0	0	0
IL13RA2	1	0	0	0	0	0	0	0	0	0	0	0	0	0	0	0	0	0	0	0	0	0	0	0	0	0	0	0	0	0	0	0	0.257026	0	0	0	0	0	0	0	0	0	0	0	0	0	0	0	0
ADORA2B	1	0	0	0	0	0	0	0	0	0	0	0	0	0	0	0	0	0	0	0	0	0	0	0	0	0	0	0	0	0	0	0	0.211576	0	0	0	0	0	0	0	0	0	0	0	0	0	0	0	0
AP1G1	3	0	0	0	0	0	0	0	0	0	0	0	0	0	0	0	0	0	0	0	0	0	0	0	0	0	0	0	0	0	0.35077	0	0.35077	0	0	0	0	0	0	0.35077	0	0	0	0	0	0	0	0	0
RAB3D	2	0	0	0	0	0	0	0	0	0	0	0	0	0	0	0	0	0	0	0	0	0	0	0	0	0	0	0	0	0	0.611309	0	0.611309	0	0	0	0	0	0	0	0	0	0	0	0	0	0	0	0
RAB15	2	0	0	0	0	0	0	0	0	0	0	0	0	0	0	0	0	0	0	0	0	0	0	0	0	0	0	0	0	0	0.461725	0	0.461725	0	0	0	0	0	0	0	0	0	0	0	0	0	0	0	0
SNX4	2	0	0	0	0	0	0	0	0	0	0	0	0	0	0	0	0	0	0	0	0	0	0	0	0	0	0	0	0	0	0.453586	0	0.453586	0	0	0	0	0	0	0	0	0	0	0	0	0	0	0	0
SYTL5	4	0	0	0	0	0	0	0	0	0	0	0	0	0	0	0	0	0	0	0	0	0	0	0	0	0	0	0	0.231628	0.231628	0	0	0.231628	0.231628	0	0	0	0	0	0	0	0	0	0	0	0	0	0	0
RPH3AL	3	0	0	0	0	0	0	0	0	0	0	0	0	0	0	0	0	0	0	0	0	0	0	0	0	0	0	0	0.204769	0	0	0	0.204769	0.204769	0	0	0	0	0	0	0	0	0	0	0	0	0	0	0
SYT14	3	0	0	0	0	0	0	0	0	0	0	0	0	0	0	0	0	0	0	0	0	0	0	0	0	0	0	0	0.208664	0	0	0	0.208664	0.208664	0	0	0	0	0	0	0	0	0	0	0	0	0	0	0
RIMS4	3	0	0	0	0	0	0	0	0	0	0	0	0	0	0	0	0	0	0	0	0	0	0	0	0.215695	0	0	0	0	0	0	0	0.215695	0.215695	0	0	0	0	0	0	0	0	0	0	0	0	0	0	0
RAB5A	2	0	0	0	0	0	0	0	0	0	0	0	0	0	0	0	0	0	0	0	0	0	0	0	0	0	0	0	0	0	0	0	0.199318	0.199318	0	0	0	0	0	0	0	0	0	0	0	0	0	0	0
ADRA2A	2	0	0	0	0	0	0	0	0	0	0	0	0	0	0	0	0	0	0	0	0	0	0	0	0	0	0	0	0	0	0	0	0.379752	0.379752	0	0	0	0	0	0	0	0	0	0	0	0	0	0	0
SPINK8	2	0	0	0	0	0	0	0	0	0	0	0	0	0	0	0	0	0	0	0	0	0	0	0	0	0	0	0	0	0	0	0	0.20157	0.20157	0	0	0	0	0	0	0	0	0	0	0	0	0	0	0
PLCB1	5	0	0	0	0	0	0	0	0	0	0	0	0	0	0	0.296349	0	0	0	0	0	0	0	0	0	0	0	0.296349	0	0	0	0.296349	0.296349	0.296349	0	0	0	0	0	0	0	0	0	0	0	0	0	0	0
CACNA1H	4	0.211422	0	0	0	0	0	0	0	0	0	0	0	0	0	0	0	0	0	0	0	0	0	0	0	0	0	0	0	0	0	0.211422	0.211422	0.211422	0	0	0	0	0	0	0	0	0	0	0	0	0	0	0
SCAMP5	4	0	0	0	0	0	0	0	0	0	0	0	0	0	0	0	0	0	0	0	0	0	0	0	0	0	0	0	0	0	0.438405	0.438405	0.438405	0.438405	0	0	0	0	0	0	0	0	0	0	0	0	0	0	0
CACNA1I	4	0	0	0	0	0	0	0	0	0	0	0	0	0	0	0	0	0	0	0	0	0	0	0	0	0	0	0	0	0	0.445969	0.445969	0.445969	0.445969	0	0	0	0	0	0	0	0	0	0	0	0	0	0	0
POMZP3	4	0	0	0	0	0	0	0	0	0	0	0	0	0	0	0	0	0	0	0	0	0	0	0	0	0	0	0	0	0	0.545391	0.545391	0.545391	0.545391	0	0	0	0	0	0	0	0	0	0	0	0	0	0	0
CDK5	27	0	0	0	0.264297	0.264297	0	0	0.264297	0.264297	0.264297	0.264297	0.264297	0.264297	0	0	0	0.264297	0.264297	0	0	0	0	0	0.264297	0.264297	0.264297	0.264297	0	0	0	0.264297	0.264297	0.264297	0.264297	0	0	0.264297	0.264297	0.264297	0.264297	0.264297	0.264297	0.264297	0.264297	0.264297	0	0	0
TOR1A	11	0	0	0	0	0	0	0	0	0	0	0.457348	0	0	0	0	0	0	0	0	0	0.457348	0	0	0.457348	0	0	0	0	0	0	0	0	0	0	0	0	0.457348	0.457348	0.457348	0.457348	0	0	0	0.457348	0	0.457348	0	0
SNCA	21	0	0	0	0	0	0	0	0	0	0	0	0	0	0	0	0	0.443739	0	0	0	0.443739	0.443739	0.443739	0.443739	0.443739	0.443739	0.443739	0	0	0	0	0	0	0.443739	0.443739	0.443739	0.443739	0.443739	0.443739	0.443739	0	0.443739	0	0.443739	0.443739	0.443739	0.443739	0
STX1B	22	0	0	0	0	0	0	0	0	0	0	0	0	0	0	0	0.448724	0	0	0	0.448724	0.448724	0	0	0.448724	0	0	0.448724	0.448724	0.448724	0	0	0.448724	0.448724	0	0	0	0.448724	0.448724	0.448724	0.448724	0.448724	0.448724	0.448724	0.448724	0.448724	0.448724	0.448724	0.448724
STX1A	24	0	0	0	0	0	0	0	0	0	0	0	0	0	0	0	0.569644	0	0	0	0.569644	0.569644	0	0	0.569644	0	0	0.569644	0.569644	0.569644	0.569644	0.569644	0.569644	0.569644	0	0	0	0.569644	0.569644	0.569644	0.569644	0.569644	0.569644	0.569644	0.569644	0.569644	0.569644	0.569644	0.569644
SYT12	23	0	0	0	0	0	0	0	0	0	0	0	0	0	0	0	0	0	0	0	0	0.436173	0	0	0.436173	0.436173	0.436173	0.436173	0.436173	0.436173	0	0	0.436173	0.436173	0.436173	0.436173	0.436173	0.436173	0.436173	0.436173	0.436173	0.436173	0.436173	0.436173	0.436173	0.436173	0.436173	0.436173	0
SYT5	17	0	0	0	0	0	0	0	0	0	0	0	0	0	0	0	0	0	0	0	0	0	0	0	0	0	0	0.455998	0.455998	0.455998	0	0	0.455998	0.455998	0.455998	0.455998	0.455998	0.455998	0.455998	0.455998	0.455998	0.455998	0.455998	0.455998	0.455998	0.455998	0	0	0
SYT1	21	0	0	0	0	0	0	0	0	0	0	0	0	0	0	0	0	0	0	0	0	0.389936	0	0	0.389936	0	0	0.389936	0.389936	0.389936	0.389936	0.389936	0.389936	0.389936	0.389936	0.389936	0.389936	0.389936	0.389936	0.389936	0.389936	0.389936	0.389936	0.389936	0.389936	0.389936	0	0	0
SYT11	17	0	0	0	0	0	0	0	0	0	0	0	0	0	0	0	0	0	0	0	0	0	0	0	0.304287	0	0	0.304287	0.304287	0.304287	0	0	0.304287	0.304287	0	0	0	0.304287	0.304287	0.304287	0.304287	0.304287	0.304287	0.304287	0.304287	0.304287	0.304287	0.304287	0
SYTL2	15	0	0	0	0	0	0	0	0	0	0	0	0	0	0	0	0.280104	0	0	0	0	0	0	0	0	0	0	0.280104	0.280104	0.280104	0	0	0.280104	0.280104	0	0	0	0.280104	0.280104	0.280104	0.280104	0.280104	0.280104	0.280104	0.280104	0.280104	0	0	0
SYT17	14	0	0	0	0	0	0	0	0	0	0	0	0	0	0	0	0	0	0	0	0	0	0	0	0	0	0	0.510347	0.510347	0.510347	0	0	0.510347	0.510347	0	0	0	0.510347	0.510347	0.510347	0.510347	0.510347	0.510347	0.510347	0.510347	0.510347	0	0	0
C2CD4A	14	0	0	0	0	0	0	0	0	0	0	0	0	0	0	0	0	0	0	0	0	0	0	0	0	0	0	0.265584	0.265584	0.265584	0	0	0.265584	0.265584	0	0	0	0.265584	0.265584	0.265584	0.265584	0.265584	0.265584	0.265584	0.265584	0.265584	0	0	0
C2CD4C	14	0	0	0	0	0	0	0	0	0	0	0	0	0	0	0	0	0	0	0	0	0	0	0	0	0	0	0.467804	0.467804	0.467804	0	0	0.467804	0.467804	0	0	0	0.467804	0.467804	0.467804	0.467804	0.467804	0.467804	0.467804	0.467804	0.467804	0	0	0
DOC2A	14	0	0	0	0	0	0	0	0	0	0	0	0	0	0	0	0	0	0	0	0	0	0	0	0	0	0	0.542824	0.542824	0.542824	0	0	0.542824	0.542824	0	0	0	0.542824	0.542824	0.542824	0.542824	0.542824	0.542824	0.542824	0.542824	0.542824	0	0	0
C2CD4D	14	0	0	0	0	0	0	0	0	0	0	0	0	0	0	0	0	0	0	0	0	0	0	0	0	0	0	0.473126	0.473126	0.473126	0	0	0.473126	0.473126	0	0	0	0.473126	0.473126	0.473126	0.473126	0.473126	0.473126	0.473126	0.473126	0.473126	0	0	0
SYT4	14	0	0	0	0	0	0	0	0	0	0	0	0	0	0	0	0	0	0	0	0	0	0	0	0	0	0	0.410321	0.410321	0.410321	0	0	0.410321	0.410321	0	0	0	0.410321	0.410321	0.410321	0.410321	0.410321	0.410321	0.410321	0.410321	0.410321	0	0	0
SYT3	14	0	0	0	0	0	0	0	0	0	0	0	0	0	0	0	0	0	0	0	0	0	0	0	0	0	0	0.281339	0.281339	0.281339	0	0	0.281339	0.281339	0	0	0	0.281339	0.281339	0.281339	0.281339	0.281339	0.281339	0.281339	0.281339	0.281339	0	0	0
DOC2B	16	0	0	0	0	0	0	0	0	0	0	0	0	0	0	0	0	0	0	0	0	0	0	0	0	0	0	0.486622	0.486622	0.486622	0.486622	0.486622	0.486622	0.486622	0	0	0	0.486622	0.486622	0.486622	0.486622	0.486622	0.486622	0.486622	0.486622	0.486622	0	0	0
SYT7	17	0	0	0	0	0	0	0	0	0	0	0	0	0	0	0	0	0	0	0	0	0	0	0	0	0	0	0.35259	0.35259	0.35259	0.35259	0.35259	0.35259	0.35259	0	0	0.35259	0.35259	0.35259	0.35259	0.35259	0.35259	0.35259	0.35259	0.35259	0.35259	0	0	0
UNC13A	20	0	0	0	0	0	0	0	0	0	0	0	0	0	0	0	0.455544	0.455544	0.455544	0	0	0.455544	0	0.455544	0.455544	0.455544	0.455544	0.455544	0	0	0	0	0	0	0	0	0	0.455544	0.455544	0.455544	0.455544	0.455544	0.455544	0.455544	0.455544	0.455544	0.455544	0.455544	0
RIMS1	17	0	0	0	0	0	0	0	0	0	0	0	0	0	0	0	0	0	0	0	0.402934	0.402934	0	0	0.402934	0.402934	0.402934	0.402934	0	0	0	0	0	0	0	0	0	0.402934	0.402934	0.402934	0.402934	0.402934	0.402934	0.402934	0.402934	0.402934	0.402934	0.402934	0
VAMP2	17	0	0	0	0	0	0	0	0	0	0	0	0	0	0	0	0	0	0	0	0	0.367864	0	0	0.367864	0.367864	0.367864	0.367864	0.367864	0.367864	0	0	0.367864	0	0	0	0	0.367864	0.367864	0.367864	0.367864	0.367864	0.367864	0.367864	0.367864	0.367864	0	0	0
STX3	18	0	0	0	0	0	0	0	0	0	0	0.294959	0	0	0	0	0.294959	0	0	0	0	0.294959	0	0	0.294959	0.294959	0.294959	0.294959	0.294959	0.294959	0	0	0	0	0	0	0	0.294959	0.294959	0.294959	0.294959	0.294959	0.294959	0.294959	0.294959	0.294959	0	0	0
SNAP25	17	0	0	0	0	0	0	0	0	0	0	0	0	0	0	0	0.542817	0	0	0	0	0.542817	0	0	0.542817	0.542817	0.542817	0.542817	0.542817	0.542817	0	0	0	0	0	0	0	0.542817	0.542817	0.542817	0.542817	0.542817	0.542817	0.542817	0.542817	0.542817	0	0	0
CPLX2	14	0	0	0	0	0	0	0	0	0	0	0	0	0	0	0	0.41214	0	0	0	0	0	0	0	0.41214	0.41214	0.41214	0.41214	0	0	0	0	0	0	0	0	0	0.41214	0.41214	0.41214	0.41214	0.41214	0.41214	0.41214	0.41214	0.41214	0	0	0
PIP5K1C	13	0	0	0	0	0	0	0	0	0	0	0	0	0	0	0	0	0	0	0	0	0	0	0	0	0	0	0.468808	0	0	0	0	0	0	0.468808	0.468808	0.468808	0.468808	0.468808	0.468808	0.468808	0.468808	0.468808	0.468808	0.468808	0.468808	0	0	0
SYNJ1	17	0	0	0	0	0	0	0	0	0	0	0	0	0	0	0	0	0	0	0	0	0.569213	0	0	0.569213	0	0	0.569213	0	0	0	0	0	0	0.569213	0.569213	0.569213	0.569213	0.569213	0.569213	0.569213	0.569213	0.569213	0.569213	0.569213	0.569213	0	0	0
LIN7A	8	0	0	0	0	0	0	0	0	0	0	0	0	0	0	0	0	0	0	0	0	0	0	0	0	0	0	0.338716	0	0	0	0	0	0	0	0	0	0.338716	0.338716	0.338716	0.338716	0.338716	0.338716	0	0.338716	0	0	0	0
SNAP29	12	0	0	0	0	0	0	0	0	0	0	0	0	0	0	0	0	0	0	0	0	0	0	0	0	0	0	0.397789	0.397789	0.397789	0	0	0	0	0	0	0	0.397789	0.397789	0.397789	0.397789	0.397789	0.397789	0.397789	0.397789	0.397789	0	0	0
DNAJC5	10	0	0	0	0	0	0	0	0	0	0	0	0	0	0	0	0	0	0	0	0	0	0	0	0	0	0	0.265471	0	0	0	0	0	0	0	0	0	0.265471	0.265471	0.265471	0.265471	0.265471	0.265471	0.265471	0.265471	0.265471	0	0	0
PCLO	10	0	0	0	0	0	0	0	0	0	0	0	0	0	0	0	0	0	0	0	0	0	0	0	0	0	0	0.461014	0	0	0	0	0	0	0	0	0	0.461014	0.461014	0.461014	0.461014	0.461014	0.461014	0.461014	0.461014	0.461014	0	0	0
CADPS2	10	0	0	0	0	0	0	0	0	0	0	0	0	0	0	0	0	0	0	0	0	0	0	0	0	0	0	0.437519	0	0	0	0	0	0	0	0	0	0.437519	0.437519	0.437519	0.437519	0.437519	0.437519	0.437519	0.437519	0.437519	0	0	0
CADPS	10	0	0	0	0	0	0	0	0	0	0	0	0	0	0	0	0	0	0	0	0	0	0	0	0	0	0	0.437601	0	0	0	0	0	0	0	0	0	0.437601	0.437601	0.437601	0.437601	0.437601	0.437601	0.437601	0.437601	0.437601	0	0	0
OPHN1	13	0	0	0	0	0	0	0	0	0	0.321546	0.321546	0.321546	0.321546	0	0	0	0	0	0	0	0	0	0	0.321546	0	0	0	0	0	0	0	0	0	0.321546	0.321546	0.321546	0.321546	0.321546	0.321546	0	0	0	0	0.321546	0.321546	0	0	0
DENND1A	8	0	0	0	0	0	0	0	0	0	0	0	0	0	0	0	0	0	0	0	0	0	0	0	0	0	0	0	0	0	0	0	0	0	0.351194	0.351194	0.351194	0.351194	0.351194	0.351194	0	0	0	0	0.351194	0.351194	0	0	0
CANX	8	0	0	0	0	0	0	0	0	0	0	0	0	0	0	0	0	0	0	0	0	0	0	0	0	0	0	0	0	0	0	0	0	0	0.3555	0.3555	0.3555	0.3555	0.3555	0.3555	0	0	0	0	0.3555	0.3555	0	0	0
SH3GL2	8	0	0	0	0	0	0	0	0	0	0	0	0	0	0	0	0	0	0	0	0	0	0	0	0	0	0	0	0	0	0	0	0	0	0.379346	0.379346	0.379346	0.379346	0.379346	0.379346	0	0	0	0	0.379346	0.379346	0	0	0
PACSIN1	10	0	0	0	0	0	0	0	0	0	0	0.323086	0.323086	0	0	0	0	0	0	0	0	0	0	0	0	0	0	0	0	0	0	0	0	0	0.323086	0.323086	0.323086	0.323086	0.323086	0.323086	0	0	0	0	0.323086	0.323086	0	0	0
RAB6A	2	0	0	0	0	0	0	0	0	0	0	0	0	0	0	0	0	0	0	0	0	0	0	0	0	0	0	0	0	0	0	0	0	0	0	0	0	0.272669	0	0.272669	0	0	0	0	0	0	0	0	0
AP1AR	3	0	0	0	0	0	0	0	0	0	0	0	0	0	0	0	0	0	0	0	0	0	0	0	0	0	0	0	0	0	0	0	0	0	0	0	0	0.288214	0.288214	0.288214	0	0	0	0	0	0	0	0	0
AP3S1	4	0	0	0	0	0	0	0	0	0	0	0	0	0	0	0	0	0	0	0	0	0	0	0	0	0	0	0	0	0	0	0	0	0	0	0	0	0.546635	0.546635	0.546635	0	0	0	0	0.546635	0	0	0	0
AP3M1	4	0	0	0	0	0	0	0	0	0	0	0	0	0	0	0	0	0	0	0	0	0	0	0	0	0	0	0	0	0	0	0	0	0	0	0	0	0.310166	0.310166	0.310166	0	0	0	0	0.310166	0	0	0	0
AP3B2	4	0	0	0	0	0	0	0	0	0	0	0	0	0	0	0	0	0	0	0	0	0	0	0	0	0	0	0	0	0	0	0	0	0	0	0	0	0.425989	0.425989	0.425989	0	0	0	0	0.425989	0	0	0	0
WDR43	2	0	0	0	0	0	0	0	0	0	0	0	0	0	0	0	0	0	0	0	0	0	0	0	0	0	0	0	0	0	0	0	0	0	0	0	0	0.348526	0.348526	0	0	0	0	0	0	0	0	0	0
HTT	2	0	0	0	0	0	0	0	0	0	0	0	0	0	0	0	0	0	0	0	0	0	0	0	0	0	0	0	0	0	0	0	0	0	0	0	0	0.266012	0.266012	0	0	0	0	0	0	0	0	0	0
ARL6	2	0	0	0	0	0	0	0	0	0	0	0	0	0	0	0	0	0	0	0	0	0	0	0	0	0	0	0	0	0	0	0	0	0	0	0	0	0.45845	0.45845	0	0	0	0	0	0	0	0	0	0
TRAPPC2	2	0	0	0	0	0	0	0	0	0	0	0	0	0	0	0	0	0	0	0	0	0	0	0	0	0	0	0	0	0	0	0	0	0	0	0	0	0.345832	0.345832	0	0	0	0	0	0	0	0	0	0
TRAPPC5	2	0	0	0	0	0	0	0	0	0	0	0	0	0	0	0	0	0	0	0	0	0	0	0	0	0	0	0	0	0	0	0	0	0	0	0	0	0.287863	0.287863	0	0	0	0	0	0	0	0	0	0
TRAPPC9	2	0	0	0	0	0	0	0	0	0	0	0	0	0	0	0	0	0	0	0	0	0	0	0	0	0	0	0	0	0	0	0	0	0	0	0	0	0.350216	0.350216	0	0	0	0	0	0	0	0	0	0
MCFD2	2	0	0	0	0	0	0	0	0	0	0	0	0	0	0	0	0	0	0	0	0	0	0	0	0	0	0	0	0	0	0	0	0	0	0	0	0	0.392422	0.392422	0	0	0	0	0	0	0	0	0	0
PPP6R1	2	0	0	0	0	0	0	0	0	0	0	0	0	0	0	0	0	0	0	0	0	0	0	0	0	0	0	0	0	0	0	0	0	0	0	0	0	0.351473	0.351473	0	0	0	0	0	0	0	0	0	0
RAB1B	2	0	0	0	0	0	0	0	0	0	0	0	0	0	0	0	0	0	0	0	0	0	0	0	0	0	0	0	0	0	0	0	0	0	0	0	0	0.269845	0.269845	0	0	0	0	0	0	0	0	0	0
KIFAP3	2	0	0	0	0	0	0	0	0	0	0	0	0	0	0	0	0	0	0	0	0	0	0	0	0	0	0	0	0	0	0	0	0	0	0	0	0	0.251362	0.251362	0	0	0	0	0	0	0	0	0	0
CSNK1D	2	0	0	0	0	0	0	0	0	0	0	0	0	0	0	0	0	0	0	0	0	0	0	0	0	0	0	0	0	0	0	0	0	0	0	0	0	0.42425	0.42425	0	0	0	0	0	0	0	0	0	0
RAB27B	2	0	0	0	0	0	0	0	0	0	0	0	0	0	0	0	0	0	0	0	0	0	0	0	0	0	0	0	0	0	0	0	0	0	0	0	0	0.445016	0.445016	0	0	0	0	0	0	0	0	0	0
BBS7	2	0	0	0	0	0	0	0	0	0	0	0	0	0	0	0	0	0	0	0	0	0	0	0	0	0	0	0	0	0	0	0	0	0	0	0	0	0.283892	0.283892	0	0	0	0	0	0	0	0	0	0
DYNC1I1	2	0	0	0	0	0	0	0	0	0	0	0	0	0	0	0	0	0	0	0	0	0	0	0	0	0	0	0	0	0	0	0	0	0	0	0	0	0.41806	0.41806	0	0	0	0	0	0	0	0	0	0
SEC23IP	2	0	0	0	0	0	0	0	0	0	0	0	0	0	0	0	0	0	0	0	0	0	0	0	0	0	0	0	0	0	0	0	0	0	0	0	0	0.399454	0.399454	0	0	0	0	0	0	0	0	0	0
NSF	2	0	0	0	0	0	0	0	0	0	0	0	0	0	0	0	0	0	0	0	0	0	0	0	0	0	0	0	0	0	0	0	0	0	0	0	0	0.404281	0.404281	0	0	0	0	0	0	0	0	0	0
KLHL12	2	0	0	0	0	0	0	0	0	0	0	0	0	0	0	0	0	0	0	0	0	0	0	0	0	0	0	0	0	0	0	0	0	0	0	0	0	0.334917	0.334917	0	0	0	0	0	0	0	0	0	0
KIF3B	2	0	0	0	0	0	0	0	0	0	0	0	0	0	0	0	0	0	0	0	0	0	0	0	0	0	0	0	0	0	0	0	0	0	0	0	0	0.248898	0.248898	0	0	0	0	0	0	0	0	0	0
KIF3A	2	0	0	0	0	0	0	0	0	0	0	0	0	0	0	0	0	0	0	0	0	0	0	0	0	0	0	0	0	0	0	0	0	0	0	0	0	0.379737	0.379737	0	0	0	0	0	0	0	0	0	0
SHROOM2	2	0	0	0	0	0	0	0	0	0	0	0	0	0	0	0	0	0	0	0	0	0	0	0	0	0	0	0	0	0	0	0	0	0	0	0	0	0.41661	0.41661	0	0	0	0	0	0	0	0	0	0
TRAPPC6B	2	0	0	0	0	0	0	0	0	0	0	0	0	0	0	0	0	0	0	0	0	0	0	0	0	0	0	0	0	0	0	0	0	0	0	0	0	0.355219	0.355219	0	0	0	0	0	0	0	0	0	0
CLASP1	2	0	0	0	0	0	0	0	0	0	0	0	0	0	0	0	0	0	0	0	0	0	0	0	0	0	0	0	0	0	0	0	0	0	0	0	0	0.311736	0.311736	0	0	0	0	0	0	0	0	0	0
SEH1L	1	0	0	0	0	0	0	0	0	0	0	0	0	0	0	0	0	0	0	0	0	0	0	0	0	0	0	0	0	0	0	0	0	0	0	0	0	0.54367	0	0	0	0	0	0	0	0	0	0	0
RHOT1	1	0	0	0	0	0	0	0	0	0	0	0	0	0	0	0	0	0	0	0	0	0	0	0	0	0	0	0	0	0	0	0	0	0	0	0	0	0.416388	0	0	0	0	0	0	0	0	0	0	0
EIF6	1	0	0	0	0	0	0	0	0	0	0	0	0	0	0	0	0	0	0	0	0	0	0	0	0	0	0	0	0	0	0	0	0	0	0	0	0	0.293008	0	0	0	0	0	0	0	0	0	0	0
SDAD1	1	0	0	0	0	0	0	0	0	0	0	0	0	0	0	0	0	0	0	0	0	0	0	0	0	0	0	0	0	0	0	0	0	0	0	0	0	0.478823	0	0	0	0	0	0	0	0	0	0	0
SPICE1	1	0	0	0	0	0	0	0	0	0	0	0	0	0	0	0	0	0	0	0	0	0	0	0	0	0	0	0	0	0	0	0	0	0	0	0	0	0.252324	0	0	0	0	0	0	0	0	0	0	0
BICD2	1	0	0	0	0	0	0	0	0	0	0	0	0	0	0	0	0	0	0	0	0	0	0	0	0	0	0	0	0	0	0	0	0	0	0	0	0	0.267387	0	0	0	0	0	0	0	0	0	0	0
ESPL1	1	0	0	0	0	0	0	0	0	0	0	0	0	0	0	0	0	0	0	0	0	0	0	0	0	0	0	0	0	0	0	0	0	0	0	0	0	0.340548	0	0	0	0	0	0	0	0	0	0	0
MSTO1	1	0	0	0	0	0	0	0	0	0	0	0	0	0	0	0	0	0	0	0	0	0	0	0	0	0	0	0	0	0	0	0	0	0	0	0	0	0.274676	0	0	0	0	0	0	0	0	0	0	0
CHMP1A	1	0	0	0	0	0	0	0	0	0	0	0	0	0	0	0	0	0	0	0	0	0	0	0	0	0	0	0	0	0	0	0	0	0	0	0	0	0.514872	0	0	0	0	0	0	0	0	0	0	0
KIF3C	1	0	0	0	0	0	0	0	0	0	0	0	0	0	0	0	0	0	0	0	0	0	0	0	0	0	0	0	0	0	0	0	0	0	0	0	0	0.369391	0	0	0	0	0	0	0	0	0	0	0
PIBF1	1	0	0	0	0	0	0	0	0	0	0	0	0	0	0	0	0	0	0	0	0	0	0	0	0	0	0	0	0	0	0	0	0	0	0	0	0	0.310861	0	0	0	0	0	0	0	0	0	0	0
MARK2	1	0	0	0	0	0	0	0	0	0	0	0	0	0	0	0	0	0	0	0	0	0	0	0	0	0	0	0	0	0	0	0	0	0	0	0	0	0.313655	0	0	0	0	0	0	0	0	0	0	0
UBE2B	1	0	0	0	0	0	0	0	0	0	0	0	0	0	0	0	0	0	0	0	0	0	0	0	0	0	0	0	0	0	0	0	0	0	0	0	0	0.417551	0	0	0	0	0	0	0	0	0	0	0
YWHAZ	1	0	0	0	0	0	0	0	0	0	0	0	0	0	0	0	0	0	0	0	0	0	0	0	0	0	0	0	0	0	0	0	0	0	0	0	0	0.432127	0	0	0	0	0	0	0	0	0	0	0
PSRC1	1	0	0	0	0	0	0	0	0	0	0	0	0	0	0	0	0	0	0	0	0	0	0	0	0	0	0	0	0	0	0	0	0	0	0	0	0	0.368438	0	0	0	0	0	0	0	0	0	0	0
CHMP7	1	0	0	0	0	0	0	0	0	0	0	0	0	0	0	0	0	0	0	0	0	0	0	0	0	0	0	0	0	0	0	0	0	0	0	0	0	0.395689	0	0	0	0	0	0	0	0	0	0	0
SPRY2	1	0	0	0	0	0	0	0	0	0	0	0	0	0	0	0	0	0	0	0	0	0	0	0	0	0	0	0	0	0	0	0	0	0	0	0	0	0.479476	0	0	0	0	0	0	0	0	0	0	0
SPRY1	1	0	0	0	0	0	0	0	0	0	0	0	0	0	0	0	0	0	0	0	0	0	0	0	0	0	0	0	0	0	0	0	0	0	0	0	0	0.406548	0	0	0	0	0	0	0	0	0	0	0
RAN	1	0	0	0	0	0	0	0	0	0	0	0	0	0	0	0	0	0	0	0	0	0	0	0	0	0	0	0	0	0	0	0	0	0	0	0	0	0.374716	0	0	0	0	0	0	0	0	0	0	0
[truncated: 2 more columns]

## Sheet: Memory subcortical -
Name	# genesets	GO_ORGANIC_CYCLIC_COMPOUND_CATABOLIC_PROCESS_signal	GO_TRANSLATIONAL_INITIATION_signal	GO_RNA_CATABOLIC_PROCESS_signal	GO_MULTI_ORGANISM_METABOLIC_PROCESS_signal	GO_NUCLEAR_TRANSCRIBED_MRNA_CATABOLIC_PROCESS_NONSENSE_MEDIATED_DECAY_signal	GO_ESTABLISHMENT_OF_PROTEIN_LOCALIZATION_TO_ENDOPLASMIC_RETICULUM_signal	GO_PROTEIN_LOCALIZATION_TO_ENDOPLASMIC_RETICULUM_signal	GO_PROTEIN_TARGETING_TO_MEMBRANE_signal	GO_POSITIVE_REGULATION_OF_STEROID_METABOLIC_PROCESS_signal	GO_REGULATION_OF_CHROMATIN_SILENCING_signal	GO_GLIAL_CELL_DEVELOPMENT_signal	GO_GLIAL_CELL_DIFFERENTIATION_signal	GO_OLIGODENDROCYTE_DIFFERENTIATION_signal	GO_ENSHEATHMENT_OF_NEURONS_signal
ASF1A	1	0	0	0	0	0	0	0	0	0	-0.355741	0	0	0	0
MIER1	1	0	0	0	0	0	0	0	0	0	-0.345808	0	0	0	0
SETDB1	1	0	0	0	0	0	0	0	0	0	-0.406869	0	0	0	0
PHF2	1	0	0	0	0	0	0	0	0	0	-0.386534	0	0	0	0
PHF8	1	0	0	0	0	0	0	0	0	0	-0.531784	0	0	0	0
TET1	1	0	0	0	0	0	0	0	0	0	-0.416786	0	0	0	0
ATAD2	1	0	0	0	0	0	0	0	0	0	-0.449116	0	0	0	0
UHRF2	1	0	0	0	0	0	0	0	0	0	-0.336726	0	0	0	0
UHRF1	1	0	0	0	0	0	0	0	0	0	-0.360502	0	0	0	0
ATAD2B	1	0	0	0	0	0	0	0	0	0	-0.321006	0	0	0	0
EIF2B4	2	0	-0.295389	0	0	0	0	0	0	0	0	0	0	0	-0.295389
ZNF396	1	0	0	0	0	0	0	0	0	0	0	0	0	0	-0.282366
MTMR2	1	0	0	0	0	0	0	0	0	0	0	0	0	0	-0.288676
ZNF24	1	0	0	0	0	0	0	0	0	0	0	0	0	0	-0.51944
KLK6	1	0	0	0	0	0	0	0	0	0	0	0	0	0	-0.510302
UGT8	1	0	0	0	0	0	0	0	0	0	0	0	0	0	-0.547438
PRX	1	0	0	0	0	0	0	0	0	0	0	0	0	0	-0.287851
PLLP	1	0	0	0	0	0	0	0	0	0	0	0	0	0	-0.45406
CLDN11	1	0	0	0	0	0	0	0	0	0	0	0	0	0	-0.522505
ACSBG1	1	0	0	0	0	0	0	0	0	0	0	0	0	0	-0.300815
CXCR4	1	0	0	0	0	0	0	0	0	0	0	0	0	0	-0.409361
JAM3	1	0	0	0	0	0	0	0	0	0	0	0	0	0	-0.493556
TSC1	1	0	0	0	0	0	0	0	0	0	0	0	0	0	-0.37178
MAL	1	0	0	0	0	0	0	0	0	0	0	0	0	0	-0.576791
QKI	1	0	0	0	0	0	0	0	0	0	0	0	0	0	-0.471435
SERINC5	1	0	0	0	0	0	0	0	0	0	0	0	0	0	-0.498313
GAL3ST1	1	0	0	0	0	0	0	0	0	0	0	0	0	0	-0.457565
ILK	1	0	0	0	0	0	0	0	0	0	0	0	0	0	-0.311964
PMP22	1	0	0	0	0	0	0	0	0	0	0	0	0	0	-0.576678
CNP	3	-0.493752	0	0	0	0	0	0	0	0	0	0	-0.493752	-0.493752	0
SOX8	2	0	0	0	0	0	0	0	0	0	0	0	-0.558814	-0.558814	0
SOX10	2	0	0	0	0	0	0	0	0	0	0	0	-0.480465	-0.480465	0
NKX6-1	2	0	0	0	0	0	0	0	0	0	0	0	-0.566817	-0.566817	0
BOK	2	0	0	0	0	0	0	0	0	0	0	0	-0.560125	-0.560125	0
OLIG1	2	0	0	0	0	0	0	0	0	0	0	0	-0.485109	-0.485109	0
OLIG2	3	0	0	0	0	0	0	0	0	0	0	0	-0.467536	-0.467536	-0.467536
SOX2	1	0	0	0	0	0	0	0	0	0	0	0	-0.503946	0	0
LIF	1	0	0	0	0	0	0	0	0	0	0	0	-0.366661	0	0
DNER	1	0	0	0	0	0	0	0	0	0	0	0	-0.352791	0	0
METRN	1	0	0	0	0	0	0	0	0	0	0	0	-0.363815	0	0
STAT3	1	0	0	0	0	0	0	0	0	0	0	0	-0.355185	0	0
DUSP10	1	0	0	0	0	0	0	0	0	0	0	0	-0.335135	0	0
KLF15	1	0	0	0	0	0	0	0	0	0	0	0	-0.441916	0	0
LEF1	1	0	0	0	0	0	0	0	0	0	0	0	-0.41831	0	0
ERBB3	1	0	0	0	0	0	0	0	0	0	0	0	-0.508811	0	0
S100B	1	0	0	0	0	0	0	0	0	0	0	0	-0.505564	0	0
PARD3	4	0	0	0	0	0	0	0	-0.331708	0	0	-0.331708	-0.331708	0	-0.331708
DICER1	4	-0.398508	0	0	0	0	0	0	0	0	0	-0.398508	-0.398508	0	-0.398508
SIRT2	3	0	0	0	0	0	0	0	0	0	0	-0.481301	-0.481301	0	-0.481301
MPP5	3	0	0	0	0	0	0	0	0	0	0	-0.344141	-0.344141	0	-0.344141
POU3F2	3	0	0	0	0	0	0	0	0	0	0	-0.409317	-0.409317	0	-0.409317
NDRG1	3	0	0	0	0	0	0	0	0	0	0	-0.534039	-0.534039	0	-0.534039
LAMA2	3	0	0	0	0	0	0	0	0	0	0	-0.444441	-0.444441	0	-0.444441
SH3TC2	3	0	0	0	0	0	0	0	0	0	0	-0.544286	-0.544286	0	-0.544286
HDAC11	2	0	0	0	0	0	0	0	0	0	0	-0.367135	-0.367135	0	0
SOX11	2	0	0	0	0	0	0	0	0	0	0	-0.353284	-0.353284	0	0
MXRA8	2	0	0	0	0	0	0	0	0	0	0	-0.362009	-0.362009	0	0
PHGDH	2	0	0	0	0	0	0	0	0	0	0	-0.420441	-0.420441	0	0
GSTP1	2	0	0	0	0	0	0	0	0	0	0	-0.420259	-0.420259	0	0
CDK6	2	0	0	0	0	0	0	0	0	0	0	-0.477322	-0.477322	0	0
DLL1	2	0	0	0	0	0	0	0	0	0	0	-0.529397	-0.529397	0	0
LAMB2	2	0	0	0	0	0	0	0	0	0	0	-0.390923	-0.390923	0	0
NKX2-2	3	0	0	0	0	0	0	0	0	0	0	-0.469005	-0.469005	-0.469005	0
LPAR1	4	0	0	0	0	0	0	0	0	0	0	-0.599384	-0.599384	-0.599384	-0.599384
TSPAN2	4	0	0	0	0	0	0	0	0	0	0	-0.505294	-0.505294	-0.505294	-0.505294
FA2H	4	0	0	0	0	0	0	0	0	0	0	-0.569961	-0.569961	-0.569961	-0.569961
PLP1	4	0	0	0	0	0	0	0	0	0	0	-0.557732	-0.557732	-0.557732	-0.557732
NKX6-2	4	0	0	0	0	0	0	0	0	0	0	-0.556754	-0.556754	-0.556754	-0.556754
CNTN2	4	0	0	0	0	0	0	0	0	0	0	-0.551413	-0.551413	-0.551413	-0.551413
KCNJ10	4	0	0	0	0	0	0	0	0	0	0	-0.477579	-0.477579	-0.477579	-0.477579
CD9	4	0	0	0	0	0	0	0	0	0	0	-0.507647	-0.507647	-0.507647	-0.507647
APOE	2	-0.278303	0	0	0	0	0	0	0	-0.278303	0	0	0	0	0
PPARGC1A	1	0	0	0	0	0	0	0	0	-0.360152	0	0	0	0	0
NR1D1	1	0	0	0	0	0	0	0	0	-0.27821	0	0	0	0	0
LDLRAP1	1	0	0	0	0	0	0	0	0	-0.470444	0	0	0	0	0
SREBF1	1	0	0	0	0	0	0	0	0	-0.474256	0	0	0	0	0
AGT	1	0	0	0	0	0	0	0	0	-0.233783	0	0	0	0	0
FGF1	1	0	0	0	0	0	0	0	0	-0.550412	0	0	0	0	0
TNF	1	0	0	0	0	0	0	0	0	-0.419122	0	0	0	0	0
ABCG1	1	0	0	0	0	0	0	0	0	-0.500481	0	0	0	0	0
BMP6	1	0	0	0	0	0	0	0	0	-0.416914	0	0	0	0	0
PRKAA1	1	0	0	0	0	0	0	0	0	-0.244229	0	0	0	0	0
APOC1	1	0	0	0	0	0	0	0	0	-0.49477	0	0	0	0	0
RNH1	2	-0.535292	0	-0.535292	0	0	0	0	0	0	0	0	0	0	0
ZC3H12A	2	-0.244881	0	-0.244881	0	0	0	0	0	0	0	0	0	0	0
XRN1	2	-0.32534	0	-0.32534	0	0	0	0	0	0	0	0	0	0	0
ATM	2	-0.236372	0	-0.236372	0	0	0	0	0	0	0	0	0	0	0
ZCCHC11	2	-0.291731	0	-0.291731	0	0	0	0	0	0	0	0	0	0	0
ZHX2	2	-0.254255	0	-0.254255	0	0	0	0	0	0	0	0	0	0	0
PRPF18	2	-0.223034	0	-0.223034	0	0	0	0	0	0	0	0	0	0	0
EXOSC8	2	-0.41345	0	-0.41345	0	0	0	0	0	0	0	0	0	0	0
DCPS	2	-0.263883	0	-0.263883	0	0	0	0	0	0	0	0	0	0	0
MLH1	2	-0.244072	0	-0.244072	0	0	0	0	0	0	0	0	0	0	0
EDC3	2	-0.246115	0	-0.246115	0	0	0	0	0	0	0	0	0	0	0
NUDT16	2	-0.332532	0	-0.332532	0	0	0	0	0	0	0	0	0	0	0
MTPAP	2	-0.322237	0	-0.322237	0	0	0	0	0	0	0	0	0	0	0
ERN1	2	-0.231117	0	-0.231117	0	0	0	0	0	0	0	0	0	0	0
ZFP36L2	2	-0.308749	0	-0.308749	0	0	0	0	0	0	0	0	0	0	0
ZFP36L1	2	-0.354687	0	-0.354687	0	0	0	0	0	0	0	0	0	0	0
PNPT1	2	-0.448648	0	-0.448648	0	0	0	0	0	0	0	0	0	0	0
LSM5	2	-0.398467	0	-0.398467	0	0	0	0	0	0	0	0	0	0	0
LSM2	2	-0.391787	0	-0.391787	0	0	0	0	0	0	0	0	0	0	0
PAN2	2	-0.432903	0	-0.432903	0	0	0	0	0	0	0	0	0	0	0
ISG20	2	-0.542725	0	-0.542725	0	0	0	0	0	0	0	0	0	0	0
LSM7	2	-0.263068	0	-0.263068	0	0	0	0	0	0	0	0	0	0	0
LIN28B	2	-0.297922	0	-0.297922	0	0	0	0	0	0	0	0	0	0	0
CNOT6	2	-0.347995	0	-0.347995	0	0	0	0	0	0	0	0	0	0	0
LSM6	2	-0.358567	0	-0.358567	0	0	0	0	0	0	0	0	0	0	0
CNOT2	2	-0.228248	0	-0.228248	0	0	0	0	0	0	0	0	0	0	0
DIS3	2	-0.241124	0	-0.241124	0	0	0	0	0	0	0	0	0	0	0
PAPD4	2	-0.334508	0	-0.334508	0	0	0	0	0	0	0	0	0	0	0
DROSHA	2	-0.304655	0	-0.304655	0	0	0	0	0	0	0	0	0	0	0
POLR2G	2	-0.317364	0	-0.317364	0	0	0	0	0	0	0	0	0	0	0
PPP2R2A	3	-0.218486	0	-0.218486	0	-0.218486	0	0	0	0	0	0	0	0	0
MAGOH	3	-0.216896	0	-0.216896	0	-0.216896	0	0	0	0	0	0	0	0	0
UPF3B	3	-0.376234	0	-0.376234	0	-0.376234	0	0	0	0	0	0	0	0	0
UPF3A	3	-0.422582	0	-0.422582	0	-0.422582	0	0	0	0	0	0	0	0	0
DCP1A	3	-0.310395	0	-0.310395	0	-0.310395	0	0	0	0	0	0	0	0	0
SMG1	3	-0.248674	0	-0.248674	0	-0.248674	0	0	0	0	0	0	0	0	0
SMG5	3	-0.316478	0	-0.316478	0	-0.316478	0	0	0	0	0	0	0	0	0
UPF1	3	-0.357404	0	-0.357404	0	-0.357404	0	0	0	0	0	0	0	0	0
EXOSC10	3	-0.463096	0	-0.463096	0	-0.463096	0	0	0	0	0	0	0	0	0
CASC3	3	-0.365958	0	-0.365958	0	-0.365958	0	0	0	0	0	0	0	0	0
EIF3E	4	-0.30514	-0.30514	-0.30514	0	-0.30514	0	0	0	0	0	0	0	0	0
NUDT5	1	-0.43652	0	0	0	0	0	0	0	0	0	0	0	0	0
PNP	1	-0.331537	0	0	0	0	0	0	0	0	0	0	0	0	0
MLYCD	1	-0.453518	0	0	0	0	0	0	0	0	0	0	0	0	0
ASRGL1	1	-0.264614	0	0	0	0	0	0	0	0	0	0	0	0	0
MTAP	1	-0.451067	0	0	0	0	0	0	0	0	0	0	0	0	0
NEIL1	1	-0.252066	0	0	0	0	0	0	0	0	0	0	0	0	0
PDE1B	1	-0.286793	0	0	0	0	0	0	0	0	0	0	0	0	0
NTHL1	1	-0.332698	0	0	0	0	0	0	0	0	0	0	0	0	0
AFMID	1	-0.50322	0	0	0	0	0	0	0	0	0	0	0	0	0
ALDH6A1	1	-0.415821	0	0	0	0	0	0	0	0	0	0	0	0	0
PDE3A	1	-0.353077	0	0	0	0	0	0	0	0	0	0	0	0	0
ADA	1	-0.511404	0	0	0	0	0	0	0	0	0	0	0	0	0
QPRT	1	-0.286946	0	0	0	0	0	0	0	0	0	0	0	0	0
TET2	1	-0.23606	0	0	0	0	0	0	0	0	0	0	0	0	0
AMPD3	1	-0.576192	0	0	0	0	0	0	0	0	0	0	0	0	0
HSD17B6	1	-0.230071	0	0	0	0	0	0	0	0	0	0	0	0	0
NT5C	1	-0.492003	0	0	0	0	0	0	0	0	0	0	0	0	0
NT5E	1	-0.268171	0	0	0	0	0	0	0	0	0	0	0	0	0
CARNS1	1	-0.555836	0	0	0	0	0	0	0	0	0	0	0	0	0
NT5M	1	-0.314374	0	0	0	0	0	0	0	0	0	0	0	0	0
ALDH4A1	1	-0.373244	0	0	0	0	0	0	0	0	0	0	0	0	0
ALDH1L1	1	-0.272753	0	0	0	0	0	0	0	0	0	0	0	0	0
COMT	1	-0.236977	0	0	0	0	0	0	0	0	0	0	0	0	0
ENPP1	1	-0.283357	0	0	0	0	0	0	0	0	0	0	0	0	0
ENPP4	1	-0.421592	0	0	0	0	0	0	0	0	0	0	0	0	0
PDE8A	1	-0.501115	0	0	0	0	0	0	0	0	0	0	0	0	0
NUDT12	1	-0.341461	0	0	0	0	0	0	0	0	0	0	0	0	0
PDE9A	1	-0.50151	0	0	0	0	0	0	0	0	0	0	0	0	0
AMDHD1	1	-0.294838	0	0	0	0	0	0	0	0	0	0	0	0	0
EPHX2	1	-0.51165	0	0	0	0	0	0	0	0	0	0	0	0	0
QDPR	1	-0.599044	0	0	0	0	0	0	0	0	0	0	0	0	0
H1F0	1	-0.226858	0	0	0	0	0	0	0	0	0	0	0	0	0
HMGB2	1	-0.571175	0	0	0	0	0	0	0	0	0	0	0	0	0
HMGB1	1	-0.249924	0	0	0	0	0	0	0	0	0	0	0	0	0
CASP3	1	-0.299738	0	0	0	0	0	0	0	0	0	0	0	0	0
UPP1	1	-0.373593	0	0	0	0	0	0	0	0	0	0	0	0	0
CAT	1	-0.328775	0	0	0	0	0	0	0	0	0	0	0	0	0
DNASE2	1	-0.337175	0	0	0	0	0	0	0	0	0	0	0	0	0
DCTPP1	1	-0.252721	0	0	0	0	0	0	0	0	0	0	0	0	0
PRTFDC1	1	-0.218634	0	0	0	0	0	0	0	0	0	0	0	0	0
PON3	1	-0.22934	0	0	0	0	0	0	0	0	0	0	0	0	0
GALT	1	-0.448298	0	0	0	0	0	0	0	0	0	0	0	0	0
HSD17B14	1	-0.325616	0	0	0	0	0	0	0	0	0	0	0	0	0
CECR2	1	-0.491017	0	0	0	0	0	0	0	0	0	0	0	0	0
PDE11A	1	-0.295632	0	0	0	0	0	0	0	0	0	0	0	0	0
PCBD1	1	-0.411725	0	0	0	0	0	0	0	0	0	0	0	0	0
MUTYH	1	-0.488151	0	0	0	0	0	0	0	0	0	0	0	0	0
DUT	1	-0.281262	0	0	0	0	0	0	0	0	0	0	0	0	0
GSTZ1	1	-0.435452	0	0	0	0	0	0	0	0	0	0	0	0	0
PDE10A	1	-0.292497	0	0	0	0	0	0	0	0	0	0	0	0	0
PDE7B	1	-0.374518	0	0	0	0	0	0	0	0	0	0	0	0	0
SPCS2	2	0	0	0	0	0	-0.480759	-0.480759	0	0	0	0	0	0	0
SRP9	3	0	0	0	0	0	-0.308748	-0.308748	-0.308748	0	0	0	0	0	0
CHMP4B	3	0	0	0	0	0	-0.238082	-0.238082	-0.238082	0	0	0	0	0	0
CHMP4A	3	0	0	0	0	0	-0.459917	-0.459917	-0.459917	0	0	0	0	0	0
RPL4	8	-0.284206	-0.284206	-0.284206	-0.284206	-0.284206	-0.284206	-0.284206	-0.284206	0	0	0	0	0	0
RPL5	8	-0.391508	-0.391508	-0.391508	-0.391508	-0.391508	-0.391508	-0.391508	-0.391508	0	0	0	0	0	0
RPL30	8	-0.400245	-0.400245	-0.400245	-0.400245	-0.400245	-0.400245	-0.400245	-0.400245	0	0	0	0	0	0
RPL3	8	-0.357026	-0.357026	-0.357026	-0.357026	-0.357026	-0.357026	-0.357026	-0.357026	0	0	0	0	0	0
RPL31	8	-0.256244	-0.256244	-0.256244	-0.256244	-0.256244	-0.256244	-0.256244	-0.256244	0	0	0	0	0	0
RPL34	8	-0.543746	-0.543746	-0.543746	-0.543746	-0.543746	-0.543746	-0.543746	-0.543746	0	0	0	0	0	0
RPL8	8	-0.255208	-0.255208	-0.255208	-0.255208	-0.255208	-0.255208	-0.255208	-0.255208	0	0	0	0	0	0
RPL9	8	-0.362938	-0.362938	-0.362938	-0.362938	-0.362938	-0.362938	-0.362938	-0.362938	0	0	0	0	0	0
RPL7	8	-0.33835	-0.33835	-0.33835	-0.33835	-0.33835	-0.33835	-0.33835	-0.33835	0	0	0	0	0	0
RPS15	8	-0.340564	-0.340564	-0.340564	-0.340564	-0.340564	-0.340564	-0.340564	-0.340564	0	0	0	0	0	0
RPS14	8	-0.291545	-0.291545	-0.291545	-0.291545	-0.291545	-0.291545	-0.291545	-0.291545	0	0	0	0	0	0
RPS17	8	-0.316968	-0.316968	-0.316968	-0.316968	-0.316968	-0.316968	-0.316968	-0.316968	0	0	0	0	0	0
RPS16	8	-0.410895	-0.410895	-0.410895	-0.410895	-0.410895	-0.410895	-0.410895	-0.410895	0	0	0	0	0	0
RPL18A	8	-0.311747	-0.311747	-0.311747	-0.311747	-0.311747	-0.311747	-0.311747	-0.311747	0	0	0	0	0	0
RPS19	8	-0.352757	-0.352757	-0.352757	-0.352757	-0.352757	-0.352757	-0.352757	-0.352757	0	0	0	0	0	0
RPS18	8	-0.29251	-0.29251	-0.29251	-0.29251	-0.29251	-0.29251	-0.29251	-0.29251	0	0	0	0	0	0
RPL35	8	-0.246174	-0.246174	-0.246174	-0.246174	-0.246174	-0.246174	-0.246174	-0.246174	0	0	0	0	0	0
RPL37	8	-0.37231	-0.37231	-0.37231	-0.37231	-0.37231	-0.37231	-0.37231	-0.37231	0	0	0	0	0	0
RPS11	8	-0.346659	-0.346659	-0.346659	-0.346659	-0.346659	-0.346659	-0.346659	-0.346659	0	0	0	0	0	0
RPS10	8	-0.366416	-0.366416	-0.366416	-0.366416	-0.366416	-0.366416	-0.366416	-0.366416	0	0	0	0	0	0
RPL39	8	-0.406084	-0.406084	-0.406084	-0.406084	-0.406084	-0.406084	-0.406084	-0.406084	0	0	0	0	0	0
RPS13	8	-0.466896	-0.466896	-0.466896	-0.466896	-0.466896	-0.466896	-0.466896	-0.466896	0	0	0	0	0	0
RPS12	8	-0.493964	-0.493964	-0.493964	-0.493964	-0.493964	-0.493964	-0.493964	-0.493964	0	0	0	0	0	0
RPL21	8	-0.361461	-0.361461	-0.361461	-0.361461	-0.361461	-0.361461	-0.361461	-0.361461	0	0	0	0	0	0
RPL23	8	-0.232239	-0.232239	-0.232239	-0.232239	-0.232239	-0.232239	-0.232239	-0.232239	0	0	0	0	0	0
RPL24	8	-0.271055	-0.271055	-0.271055	-0.271055	-0.271055	-0.271055	-0.271055	-0.271055	0	0	0	0	0	0
RPL27	8	-0.293226	-0.293226	-0.293226	-0.293226	-0.293226	-0.293226	-0.293226	-0.293226	0	0	0	0	0	0
RPL26	8	-0.350024	-0.350024	-0.350024	-0.350024	-0.350024	-0.350024	-0.350024	-0.350024	0	0	0	0	0	0
RPS4Y1	8	-0.312921	-0.312921	-0.312921	-0.312921	-0.312921	-0.312921	-0.312921	-0.312921	0	0	0	0	0	0
RPL41	8	-0.392882	-0.392882	-0.392882	-0.392882	-0.392882	-0.392882	-0.392882	-0.392882	0	0	0	0	0	0
RPS26	8	-0.325455	-0.325455	-0.325455	-0.325455	-0.325455	-0.325455	-0.325455	-0.325455	0	0	0	0	0	0
RPS25	8	-0.435446	-0.435446	-0.435446	-0.435446	-0.435446	-0.435446	-0.435446	-0.435446	0	0	0	0	0	0
RPS28	8	-0.373502	-0.373502	-0.373502	-0.373502	-0.373502	-0.373502	-0.373502	-0.373502	0	0	0	0	0	0
RPS27	8	-0.42605	-0.42605	-0.42605	-0.42605	-0.42605	-0.42605	-0.42605	-0.42605	0	0	0	0	0	0
RPS29	8	-0.441044	-0.441044	-0.441044	-0.441044	-0.441044	-0.441044	-0.441044	-0.441044	0	0	0	0	0	0
RPS20	8	-0.361161	-0.361161	-0.361161	-0.361161	-0.361161	-0.361161	-0.361161	-0.361161	0	0	0	0	0	0
RPS23	8	-0.402399	-0.402399	-0.402399	-0.402399	-0.402399	-0.402399	-0.402399	-0.402399	0	0	0	0	0	0
RPLP1	8	-0.320046	-0.320046	-0.320046	-0.320046	-0.320046	-0.320046	-0.320046	-0.320046	0	0	0	0	0	0
RPLP0	8	-0.221978	-0.221978	-0.221978	-0.221978	-0.221978	-0.221978	-0.221978	-0.221978	0	0	0	0	0	0
RPL10	8	-0.437637	-0.437637	-0.437637	-0.437637	-0.437637	-0.437637	-0.437637	-0.437637	0	0	0	0	0	0
RPL12	8	-0.320399	-0.320399	-0.320399	-0.320399	-0.320399	-0.320399	-0.320399	-0.320399	0	0	0	0	0	0
RPL11	8	-0.439763	-0.439763	-0.439763	-0.439763	-0.439763	-0.439763	-0.439763	-0.439763	0	0	0	0	0	0
RPS15A	8	-0.443062	-0.443062	-0.443062	-0.443062	-0.443062	-0.443062	-0.443062	-0.443062	0	0	0	0	0	0
RPL14	8	-0.22134	-0.22134	-0.22134	-0.22134	-0.22134	-0.22134	-0.22134	-0.22134	0	0	0	0	0	0
RPS3	8	-0.369024	-0.369024	-0.369024	-0.369024	-0.369024	-0.369024	-0.369024	-0.369024	0	0	0	0	0	0
RPL13	8	-0.376009	-0.376009	-0.376009	-0.376009	-0.376009	-0.376009	-0.376009	-0.376009	0	0	0	0	0	0
RPS27A	8	-0.265199	-0.265199	-0.265199	-0.265199	-0.265199	-0.265199	-0.265199	-0.265199	0	0	0	0	0	0
RPL18	8	-0.359629	-0.359629	-0.359629	-0.359629	-0.359629	-0.359629	-0.359629	-0.359629	0	0	0	0	0	0
RPL17	8	-0.311626	-0.311626	-0.311626	-0.311626	-0.311626	-0.311626	-0.311626	-0.311626	0	0	0	0	0	0
RPL19	8	-0.356981	-0.356981	-0.356981	-0.356981	-0.356981	-0.356981	-0.356981	-0.356981	0	0	0	0	0	0
FAU	8	-0.244329	-0.244329	-0.244329	-0.244329	-0.244329	-0.244329	-0.244329	-0.244329	0	0	0	0	0	0
RPS9	8	-0.385225	-0.385225	-0.385225	-0.385225	-0.385225	-0.385225	-0.385225	-0.385225	0	0	0	0	0	0
RPS7	8	-0.258212	-0.258212	-0.258212	-0.258212	-0.258212	-0.258212	-0.258212	-0.258212	0	0	0	0	0	0
RPS8	8	-0.356972	-0.356972	-0.356972	-0.356972	-0.356972	-0.356972	-0.356972	-0.356972	0	0	0	0	0	0
RPS5	8	-0.333037	-0.333037	-0.333037	-0.333037	-0.333037	-0.333037	-0.333037	-0.333037	0	0	0	0	0	0
RPS6	8	-0.42352	-0.42352	-0.42352	-0.42352	-0.42352	-0.42352	-0.42352	-0.42352	0	0	0	0	0	0
RPSA	8	-0.320703	-0.320703	-0.320703	-0.320703	-0.320703	-0.320703	-0.320703	-0.320703	0	0	0	0	0	0
RPS4X	8	-0.294303	-0.294303	-0.294303	-0.294303	-0.294303	-0.294303	-0.294303	-0.294303	0	0	0	0	0	0
RPL7A	8	-0.287344	-0.287344	-0.287344	-0.287344	-0.287344	-0.287344	-0.287344	-0.287344	0	0	0	0	0	0
RPL13A	8	-0.383014	-0.383014	-0.383014	-0.383014	-0.383014	-0.383014	-0.383014	-0.383014	0	0	0	0	0	0
RPS3A	8	-0.373856	-0.373856	-0.373856	-0.373856	-0.373856	-0.373856	-0.373856	-0.373856	0	0	0	0	0	0
RPL37A	8	-0.439085	-0.439085	-0.439085	-0.439085	-0.439085	-0.439085	-0.439085	-0.439085	0	0	0	0	0	0
RPL36A	8	-0.302178	-0.302178	-0.302178	-0.302178	-0.302178	-0.302178	-0.302178	-0.302178	0	0	0	0	0	0
RPL35A	8	-0.234745	-0.234745	-0.234745	-0.234745	-0.234745	-0.234745	-0.234745	-0.234745	0	0	0	0	0	0
RPL23A	8	-0.4216	-0.4216	-0.4216	-0.4216	-0.4216	-0.4216	-0.4216	-0.4216	0	0	0	0	0	0
NUP54	2	0	0	0	-0.480371	0	0	0	-0.480371	0	0	0	0	0	0
NUP107	1	0	0	0	-0.41338	0	0	0	0	0	0	0	0	0	0
NUP210	1	0	0	0	-0.331338	0	0	0	0	0	0	0	0	0	0
POM121	1	0	0	0	-0.368608	0	0	0	0	0	0	0	0	0	0
AAAS	1	0	0	0	-0.296172	0	0	0	0	0	0	0	0	0	0
NUP188	1	0	0	0	-0.295397	0	0	0	0	0	0	0	0	0	0
MAP2K3	1	0	0	0	-0.436708	0	0	0	0	0	0	0	0	0	0
NUP160	1	0	0	0	-0.359536	0	0	0	0	0	0	0	0	0	0
TPR	1	0	0	0	-0.29972	0	0	0	0	0	0	0	0	0	0
ATG16L2	1	0	0	0	-0.31247	0	0	0	0	0	0	0	0	0	0
NUP133	1	0	0	0	-0.274028	0	0	0	0	0	0	0	0	0	0
NUP43	1	0	0	0	-0.440929	0	0	0	0	0	0	0	0	0	0
RPL32	2	0	-0.19926	0	0	0	0	0	-0.19926	0	0	0	0	0	0
RPL38	2	0	-0.210444	0	0	0	0	0	-0.210444	0	0	0	0	0	0
RPL10A	2	0	-0.194694	0	0	0	0	0	-0.194694	0	0	0	0	0	0
RABGEF1	1	0	0	0	0	0	0	0	-0.371874	0	0	0	0	0	0
ATG3	1	0	0	0	0	0	0	0	-0.4896	0	0	0	0	0	0
ANK1	1	0	0	0	0	0	0	0	-0.20347	0	0	0	0	0	0
ICMT	1	0	0	0	0	0	0	0	-0.298723	0	0	0	0	0	0
TRAM1	1	0	0	0	0	0	0	0	-0.212933	0	0	0	0	0	0
ANXA2	1	0	0	0	0	0	0	0	-0.443426	0	0	0	0	0	0
SSR2	1	0	0	0	0	0	0	0	-0.229917	0	0	0	0	0	0
PACS2	1	0	0	0	0	0	0	0	-0.450485	0	0	0	0	0	0
TRAM1L1	1	0	0	0	0	0	0	0	-0.38804	0	0	0	0	0	0
SRP68	1	0	0	0	0	0	0	0	-0.200936	0	0	0	0	0	0
RTP4	1	0	0	0	0	0	0	0	-0.43547	0	0	0	0	0	0
ATG4C	1	0	0	0	0	0	0	0	-0.537097	0	0	0	0	0	0
MYO1C	1	0	0	0	0	0	0	0	-0.203111	0	0	0	0	0	0
EIF4A2	1	0	-0.197613	0	0	0	0	0	0	0	0	0	0	0	0
EIF2D	1	0	-0.285713	0	0	0	0	0	0	0	0	0	0	0	0
EIF1	1	0	-0.247177	0	0	0	0	0	0	0	0	0	0	0	0
EIF2B5	1	0	-0.262326	0	0	0	0	0	0	0	0	0	0	0	0
EIF2S2	1	0	-0.32405	0	0	0	0	0	0	0	0	0	0	0	0
DDX3Y	1	0	-0.411505	0	0	0	0	0	0	0	0	0	0	0	0
EIF4E2	1	0	-0.255916	0	0	0	0	0	0	0	0	0	0	0	0
MTIF2	1	0	-0.31961	0	0	0	0	0	0	0	0	0	0	0	0
EIF4H	1	0	-0.260241	0	0	0	0	0	0	0	0	0	0	0	0
EIF4B	1	0	-0.208055	0	0	0	0	0	0	0	0	0	0	0	0
ABCF1	1	0	-0.358291	0	0	0	0	0	0	0	0	0	0	0	0
EIF3L	1	0	-0.211009	0	0	0	0	0	0	0	0	0	0	0	0
EIF3J	1	0	-0.303331	0	0	0	0	0	0	0	0	0	0	0	0
EIF3H	1	0	-0.287074	0	0	0	0	0	0	0	0	0	0	0	0
PCBP2	2	0	-0.525288	0	-0.525288	0	0	0	0	0	0	0	0	0	0
EIF3G	2	0	-0.247256	0	-0.247256	0	0	0	0	0	0	0	0	0	0
EIF3F	2	0	-0.25744	0	-0.25744	0	0	0	0	0	0	0	0	0	0
EIF3D	2	0	-0.224369	0	-0.224369	0	0	0	0	0	0	0	0	0	0
EIF3A	2	0	-0.29517	0	-0.29517	0	0	0	0	0	0	0	0	0	0

## Sheet: Motor cortical +
Name	# genesets	GO_INTERMEDIATE_FILAMENT_ORGANIZATION_signal	GO_INTERMEDIATE_FILAMENT_BASED_PROCESS_signal	GO_HETEROTYPIC_CELL_CELL_ADHESION_signal	GO_MESODERMAL_CELL_DIFFERENTIATION_signal	GO_REGULATION_OF_VASCULAR_ENDOTHELIAL_GROWTH_FACTOR_RECEPTOR_SIGNALING_PATHWAY_signal	GO_NEGATIVE_REGULATION_OF_GLYCOPROTEIN_METABOLIC_PROCESS_signal	GO_PROTEIN_MATURATION_signal	GO_PEPTIDE_HORMONE_PROCESSING_signal	GO_WALKING_BEHAVIOR_signal	GO_PHOSPHOLIPID_CATABOLIC_PROCESS_signal	GO_SPHINGOLIPID_BIOSYNTHETIC_PROCESS_signal	GO_C21_STEROID_HORMONE_METABOLIC_PROCESS_signal	GO_INTRACELLULAR_LIPID_TRANSPORT_signal	GO_ORGANIC_ACID_TRANSMEMBRANE_TRANSPORT_signal	GO_AMINO_ACID_TRANSMEMBRANE_TRANSPORT_signal	GO_RESPONSE_TO_THYROID_HORMONE_signal	GO_RESPONSE_TO_LEAD_ION_signal	GO_GLYOXYLATE_METABOLIC_PROCESS_signal	GO_CELLULAR_ALDEHYDE_METABOLIC_PROCESS_signal	GO_PHOSPHOLIPID_DEPHOSPHORYLATION_signal	GO_PHOSPHATIDYLINOSITOL_DEPHOSPHORYLATION_signal	GO_DICARBOXYLIC_ACID_METABOLIC_PROCESS_signal	GO_DRUG_TRANSPORT_signal	GO_COFACTOR_TRANSPORT_signal	GO_VITAMIN_TRANSPORT_signal	GO_RIBONUCLEOSIDE_CATABOLIC_PROCESS_signal	GO_IRON_ION_HOMEOSTASIS_signal	GO_ALCOHOL_BIOSYNTHETIC_PROCESS_signal	GO_SMALL_MOLECULE_BIOSYNTHETIC_PROCESS_signal	GO_POLYOL_BIOSYNTHETIC_PROCESS_signal	GO_MONOSACCHARIDE_BIOSYNTHETIC_PROCESS_signal	GO_CARBOHYDRATE_BIOSYNTHETIC_PROCESS_signal	GO_OXIDOREDUCTION_COENZYME_METABOLIC_PROCESS_signal	GO_GLUCOSE_CATABOLIC_PROCESS_signal	GO_NAD_METABOLIC_PROCESS_signal	GO_NADH_METABOLIC_PROCESS_signal	GO_NUCLEOTIDE_PHOSPHORYLATION_signal	GO_ATP_GENERATION_FROM_ADP_signal	GO_ADP_METABOLIC_PROCESS_signal	GO_NUCLEOSIDE_DIPHOSPHATE_METABOLIC_PROCESS_signal	GO_RIBONUCLEOSIDE_DIPHOSPHATE_METABOLIC_PROCESS_signal	GO_PYRUVATE_METABOLIC_PROCESS_signal	GO_COFACTOR_BIOSYNTHETIC_PROCESS_signal	GO_COFACTOR_METABOLIC_PROCESS_signal	GO_COENZYME_METABOLIC_PROCESS_signal	GO_CELLULAR_CARBOHYDRATE_METABOLIC_PROCESS_signal	GO_ENERGY_RESERVE_METABOLIC_PROCESS_signal	GO_GLUCAN_METABOLIC_PROCESS_signal
PPARGC1A	8	0	0	0	0	0	0	0	0	0	0	0	0	0	0	0	0.259622	0	0	0	0	0	0	0	0	0	0	0	0	0.259622	0	0.259622	0.259622	0	0	0	0	0	0	0	0	0	0	0	0	0	0	0	0
SLC25A12	9	0	0	0	0	0	0	0	0	0	0	0	0	0	0.166043	0.166043	0	0	0	0	0	0	0	0	0	0	0	0	0	0.166043	0	0.166043	0.166043	0	0	0	0	0	0	0	0	0	0	0	0	0	0	0	0
SLC25A13	14	0	0	0	0	0	0	0	0	0	0	0	0	0	0.111925	0.111925	0	0	0	0	0	0	0	0	0	0	0	0	0	0.111925	0	0.111925	0.111925	0	0	0	0	0	0	0	0	0	0	0	0	0	0	0	0
PINK1	2	0	0	0	0	0	0	0	0	0	0	0	0	0	0	0	0	0	0	0	0	0	0	0	0	0	0	0	0	0	0	0	0	0	0	0	0	0	0	0	0	0	0	0	0	0	0	0	0
PHKA2	1	0	0	0	0	0	0	0	0	0	0	0	0	0	0	0	0	0	0	0	0	0	0	0	0	0	0	0	0	0	0	0	0	0	0	0	0	0	0	0	0	0	0	0	0	0	0	0	0
PPP1CB	1	0	0	0	0	0	0	0	0	0	0	0	0	0	0	0	0	0	0	0	0	0	0	0	0	0	0	0	0	0	0	0	0	0	0	0	0	0	0	0	0	0	0	0	0	0	0	0	0
GSK3B	1	0	0	0	0	0	0	0	0	0	0	0	0	0	0	0	0	0	0	0	0	0	0	0	0	0	0	0	0	0	0	0	0	0	0	0	0	0	0	0	0	0	0	0	0	0	0	0	0
NDUFAF2	6	0	0	0	0	0	0	0	0	0	0	0	0	0	0	0	0	0	0	0	0	0	0	0	0	0	0	0	0	0	0	0	0	0	0	0	0	0	0	0	0	0	0	0	0	0	0	0	0
OXA1L	5	0	0	0	0	0	0	0	0	0	0	0	0	0	0	0	0	0	0	0	0	0	0	0	0	0	0	0	0	0	0	0	0	0	0	0	0	0	0	0	0	0	0	0	0	0	0	0	0
MTFR1	3	0	0	0	0	0	0	0	0	0	0	0	0	0	0	0	0	0	0	0	0	0	0	0	0	0	0	0	0	0	0	0	0	0	0	0	0	0	0	0	0	0	0	0	0	0	0	0	0
ACO1	5	0	0	0	0	0	0	0	0	0	0	0	0	0	0	0	0	0	0	0	0	0	0	0	0	0	0	0.162394	0	0	0	0	0	0	0	0	0	0	0	0	0	0	0	0	0	0	0	0	0
ACO2	4	0	0	0	0	0	0	0	0	0	0	0	0	0	0	0	0	0	0	0	0	0	0	0	0	0	0	0	0	0	0	0	0	0	0	0	0	0	0	0	0	0	0	0	0	0	0	0	0
IDH3A	4	0	0	0	0	0	0	0	0	0	0	0	0	0	0	0	0	0	0	0	0	0	0	0	0	0	0	0	0	0	0	0	0	0	0	0	0	0	0	0	0	0	0	0	0	0	0	0	0
SDHD	4	0	0	0	0	0	0	0	0	0	0	0	0	0	0	0	0	0	0	0	0	0	0	0	0	0	0	0	0	0	0	0	0	0	0	0	0	0	0	0	0	0	0	0	0	0	0	0	0
FH	5	0	0	0	0	0	0	0	0	0	0	0	0	0	0	0	0	0	0	0	0	0	0.131662	0	0	0	0	0	0	0	0	0	0	0	0	0	0	0	0	0	0	0	0	0	0	0	0	0	0
SDHA	6	0	0	0	0	0	0	0	0	0	0	0	0	0	0	0	0	0	0	0	0	0	0.16382	0	0	0	0	0	0	0	0	0	0	0	0	0	0	0	0	0	0	0	0	0	0	0	0	0	0
SDHB	6	0	0	0	0	0	0	0	0	0	0	0	0	0	0	0	0	0	0	0	0	0	0.155343	0	0	0	0	0	0	0	0	0	0	0	0	0	0	0	0	0	0	0	0	0	0	0	0	0	0
FASTKD1	3	0	0	0	0	0	0	0	0	0	0	0	0	0	0	0	0	0	0	0	0	0	0	0	0	0	0	0	0	0	0	0	0	0	0	0	0	0	0	0	0	0	0	0	0	0	0	0	0
FASTKD2	3	0	0	0	0	0	0	0	0	0	0	0	0	0	0	0	0	0	0	0	0	0	0	0	0	0	0	0	0	0	0	0	0	0	0	0	0	0	0	0	0	0	0	0	0	0	0	0	0
FASTKD5	3	0	0	0	0	0	0	0	0	0	0	0	0	0	0	0	0	0	0	0	0	0	0	0	0	0	0	0	0	0	0	0	0	0	0	0	0	0	0	0	0	0	0	0	0	0	0	0	0
TBRG4	2	0	0	0	0	0	0	0	0	0	0	0	0	0	0	0	0	0	0	0	0	0	0	0	0	0	0	0	0	0	0	0	0	0	0	0	0	0	0	0	0	0	0	0	0	0	0	0	0
PPARD	1	0	0	0	0	0	0	0	0	0	0	0	0	0	0	0	0	0	0	0	0	0	0	0	0	0	0	0	0	0	0	0	0	0	0	0	0	0	0	0	0	0	0	0	0	0	0	0	0
SLC25A3	1	0	0	0	0	0	0	0	0	0	0	0	0	0	0	0	0	0	0	0	0	0	0	0	0	0	0	0	0	0	0	0	0	0	0	0	0	0	0	0	0	0	0	0	0	0	0	0	0
SLC25A4	1	0	0	0	0	0	0	0	0	0	0	0	0	0	0	0	0	0	0	0	0	0	0	0	0	0	0	0	0	0	0	0	0	0	0	0	0	0	0	0	0	0	0	0	0	0	0	0	0
COX17	1	0	0	0	0	0	0	0	0	0	0	0	0	0	0	0	0	0	0	0	0	0	0	0	0	0	0	0	0	0	0	0	0	0	0	0	0	0	0	0	0	0	0	0	0	0	0	0	0
MYC	4	0	0	0	0	0	0	0	0	0	0	0	0	0	0	0	0	0	0	0	0	0	0	0	0	0	0	0.253834	0	0	0	0	0	0	0	0	0	0	0	0	0	0	0	0	0	0	0	0.253834	0
MRAP2	3	0	0	0	0	0	0	0	0	0	0	0	0	0	0	0	0	0	0	0	0	0	0	0	0	0	0	0	0	0	0	0	0	0	0	0	0	0	0	0	0	0	0	0	0	0	0	0.143264	0
GNAS	3	0	0	0	0	0	0	0	0	0	0	0	0	0	0	0	0	0	0	0	0	0	0	0	0	0	0	0	0	0	0	0	0	0	0	0	0	0	0	0	0	0	0	0	0	0	0	0.216929	0
PPP1CC	5	0	0	0	0	0	0	0	0	0	0	0	0	0	0	0	0	0	0	0	0	0	0	0	0	0	0	0	0	0	0	0	0	0	0	0	0	0	0	0	0	0	0	0	0	0	0.114873	0.114873	0.114873
IL6ST	5	0	0	0	0	0	0	0	0	0	0	0	0	0	0	0	0	0	0	0	0	0	0	0	0	0	0	0	0	0	0	0	0	0	0	0	0	0	0	0	0	0	0	0	0	0	0.139076	0.139076	0.139076
PHKB	5	0	0	0	0	0	0	0	0	0	0	0	0	0	0	0	0	0	0	0	0	0	0	0	0	0	0	0	0	0	0	0	0	0	0	0	0	0	0	0	0	0	0	0	0	0	0.111814	0.111814	0.111814
PPP1R3B	5	0	0	0	0	0	0	0	0	0	0	0	0	0	0	0	0	0	0	0	0	0	0	0	0	0	0	0	0	0	0	0	0	0	0	0	0	0	0	0	0	0	0	0	0	0	0.239434	0.239434	0.239434
PPP1R3D	5	0	0	0	0	0	0	0	0	0	0	0	0	0	0	0	0	0	0	0	0	0	0	0	0	0	0	0	0	0	0	0	0	0	0	0	0	0	0	0	0	0	0	0	0	0	0.199583	0.199583	0.199583
PCDH12	5	0	0	0	0	0	0	0	0	0	0	0	0	0	0	0	0	0	0	0	0	0	0	0	0	0	0	0	0	0	0	0	0	0	0	0	0	0	0	0	0	0	0	0	0	0	0.311919	0.311919	0.311919
CALM2	5	0	0	0	0	0	0	0	0	0	0	0	0	0	0	0	0	0	0	0	0	0	0	0	0	0	0	0	0	0	0	0	0	0	0	0	0	0	0	0	0	0	0	0	0	0	0.118554	0.118554	0.118554
GAA	5	0	0	0	0	0	0	0	0	0	0	0	0	0	0	0	0	0	0	0	0	0	0	0	0	0	0	0	0	0	0	0	0	0	0	0	0	0	0	0	0	0	0	0	0	0	0.17371	0.17371	0.17371
GYG1	6	0	0	0	0	0	0	0	0	0	0	0	0	0	0	0	0	0	0	0	0	0	0	0	0	0	0	0	0	0	0	0	0.144265	0	0	0	0	0	0	0	0	0	0	0	0	0	0.144265	0.144265	0.144265
PPP1R3C	6	0	0	0	0	0	0	0	0	0	0	0	0	0	0	0	0	0	0	0	0	0	0	0	0	0	0	0	0	0	0	0	0.118081	0	0	0	0	0	0	0	0	0	0	0	0	0	0.118081	0.118081	0.118081
GBE1	6	0	0	0	0	0	0	0	0	0	0	0	0	0	0	0	0	0	0	0	0	0	0	0	0	0	0	0	0	0	0	0	0.366341	0	0	0	0	0	0	0	0	0	0	0	0	0	0.366341	0.366341	0.366341
GYS1	6	0	0	0	0	0	0	0	0	0	0	0	0	0	0	0	0	0	0	0	0	0	0	0	0	0	0	0	0	0	0	0	0.118059	0	0	0	0	0	0	0	0	0	0	0	0	0	0.118059	0.118059	0.118059
UGP2	7	0	0	0	0	0	0	0	0	0	0	0	0	0	0	0	0	0	0	0	0	0	0	0	0	0	0	0	0	0.201028	0	0	0.201028	0	0	0	0	0	0	0	0	0	0	0	0	0	0.201028	0.201028	0.201028
SMPDL3A	3	0	0	0	0	0	0	0	0	0	0.105878	0	0	0	0	0	0	0	0	0	0	0	0	0	0	0	0	0	0	0	0	0	0	0	0	0	0	0	0	0	0	0	0	0	0	0	0	0	0
ABHD6	1	0	0	0	0	0	0	0	0	0	0.292587	0	0	0	0	0	0	0	0	0	0	0	0	0	0	0	0	0	0	0	0	0	0	0	0	0	0	0	0	0	0	0	0	0	0	0	0	0	0
GDE1	1	0	0	0	0	0	0	0	0	0	0.096336	0	0	0	0	0	0	0	0	0	0	0	0	0	0	0	0	0	0	0	0	0	0	0	0	0	0	0	0	0	0	0	0	0	0	0	0	0	0
ENPP2	1	0	0	0	0	0	0	0	0	0	0.118085	0	0	0	0	0	0	0	0	0	0	0	0	0	0	0	0	0	0	0	0	0	0	0	0	0	0	0	0	0	0	0	0	0	0	0	0	0	0
ENPP6	1	0	0	0	0	0	0	0	0	0	0.191731	0	0	0	0	0	0	0	0	0	0	0	0	0	0	0	0	0	0	0	0	0	0	0	0	0	0	0	0	0	0	0	0	0	0	0	0	0	0
GPCPD1	1	0	0	0	0	0	0	0	0	0	0.216947	0	0	0	0	0	0	0	0	0	0	0	0	0	0	0	0	0	0	0	0	0	0	0	0	0	0	0	0	0	0	0	0	0	0	0	0	0	0
PGM1	22	0	0	0	0	0	0	0	0	0	0	0	0	0	0	0	0	0	0	0	0	0	0	0	0	0	0	0	0	0.120724	0	0.120724	0.120724	0.120724	0	0	0	0.120724	0.120724	0.120724	0.120724	0.120724	0.120724	0	0.120724	0.120724	0.120724	0.120724	0.120724
PFKM	22	0	0	0	0	0	0	0	0	0	0	0	0	0	0	0	0	0	0	0	0	0	0	0	0	0	0	0	0	0	0	0	0	0.170725	0.170725	0.170725	0.170725	0.170725	0.170725	0.170725	0.170725	0.170725	0.170725	0	0.170725	0.170725	0.170725	0.170725	0.170725
ADPGK	15	0	0	0	0	0	0	0	0	0	0	0	0	0	0	0	0	0	0	0	0	0	0	0	0	0	0	0	0	0	0	0	0	0.115969	0	0	0	0.115969	0.115969	0.115969	0.115969	0.115969	0.115969	0	0.115969	0.115969	0	0	0
PFKP	18	0	0	0	0	0	0	0	0	0	0	0	0	0	0	0	0	0	0	0	0	0	0	0	0	0	0	0	0	0	0	0	0	0.235398	0.235398	0.235398	0.235398	0.235398	0.235398	0.235398	0.235398	0.235398	0.235398	0	0.235398	0.235398	0	0	0
PGAM4	18	0	0	0	0	0	0	0	0	0	0	0	0	0	0	0	0	0	0	0	0	0	0	0	0	0	0	0	0	0.130948	0	0.130948	0.130948	0.130948	0	0	0	0.130948	0.130948	0.130948	0.130948	0.130948	0.130948	0	0.130948	0.130948	0	0	0
BPGM	18	0	0	0	0	0	0	0	0	0	0	0	0	0	0	0	0	0	0	0	0	0	0	0	0	0	0	0	0	0.150679	0	0.150679	0.150679	0.150679	0	0	0	0.150679	0.150679	0.150679	0.150679	0.150679	0.150679	0	0.150679	0.150679	0	0	0
ENO2	21	0	0	0	0	0	0	0	0	0	0	0	0	0	0	0	0	0	0	0	0	0	0	0	0	0	0	0	0	0.158603	0	0.158603	0.158603	0.158603	0.158603	0.158603	0.158603	0.158603	0.158603	0.158603	0.158603	0.158603	0.158603	0	0.158603	0.158603	0	0	0
ENO3	21	0	0	0	0	0	0	0	0	0	0	0	0	0	0	0	0	0	0	0	0	0	0	0	0	0	0	0	0	0.233111	0	0.233111	0.233111	0.233111	0.233111	0.233111	0.233111	0.233111	0.233111	0.233111	0.233111	0.233111	0.233111	0	0.233111	0.233111	0	0	0
PGAM1	21	0	0	0	0	0	0	0	0	0	0	0	0	0	0	0	0	0	0	0	0	0	0	0	0	0	0	0	0	0.153649	0	0.153649	0.153649	0.153649	0.153649	0.153649	0.153649	0.153649	0.153649	0.153649	0.153649	0.153649	0.153649	0	0.153649	0.153649	0	0	0
PGK1	21	0	0	0	0	0	0	0	0	0	0	0	0	0	0	0	0	0	0	0	0	0	0	0	0	0	0	0	0	0.150213	0	0.150213	0.150213	0.150213	0.150213	0.150213	0.150213	0.150213	0.150213	0.150213	0.150213	0.150213	0.150213	0	0.150213	0.150213	0	0	0
GAPDH	21	0	0	0	0	0	0	0	0	0	0	0	0	0	0	0	0	0	0	0	0	0	0	0	0	0	0	0	0	0.168186	0	0.168186	0.168186	0.168186	0.168186	0.168186	0.168186	0.168186	0.168186	0.168186	0.168186	0.168186	0.168186	0	0.168186	0.168186	0	0	0
ALDOC	21	0	0	0	0	0	0	0	0	0	0	0	0	0	0	0	0	0	0	0	0	0	0	0	0	0	0	0	0	0.196818	0	0.196818	0.196818	0.196818	0.196818	0.196818	0.196818	0.196818	0.196818	0.196818	0.196818	0.196818	0.196818	0	0.196818	0.196818	0	0	0
OGDHL	18	0	0	0	0	0	0	0	0	0	0	0	0	0	0	0	0	0	0	0	0	0	0	0	0	0	0	0	0	0	0	0	0	0.233065	0	0	0	0.233065	0.233065	0.233065	0.233065	0.233065	0.233065	0	0.233065	0.233065	0	0	0
NUDT5	3	0	0	0	0	0	0	0	0	0	0	0	0	0	0	0	0	0	0	0	0	0	0	0	0	0	0	0	0	0	0	0	0	0	0	0	0	0	0	0	0.161314	0.161314	0	0	0	0	0	0	0
ENTPD2	3	0	0	0	0	0	0	0	0	0	0	0	0	0	0	0	0	0	0	0	0	0	0	0	0	0	0	0	0	0	0	0	0	0	0	0	0	0	0	0	0.118758	0.118758	0	0	0	0	0	0	0
ENTPD4	5	0	0	0	0	0	0	0	0	0	0	0	0	0	0	0	0	0	0	0	0	0	0	0	0	0	0.189772	0	0	0	0	0	0	0	0	0	0	0	0	0	0.189772	0.189772	0	0	0	0	0	0	0
AK1	9	0	0	0	0	0	0	0	0	0	0	0	0	0	0	0	0	0	0	0	0	0	0	0	0	0	0	0	0	0	0	0	0	0	0	0	0	0.220637	0	0.220637	0.220637	0.220637	0	0	0	0	0	0	0
AK2	12	0	0	0	0	0	0	0	0	0	0	0	0	0	0	0	0.252449	0	0	0	0	0	0	0	0	0	0	0	0	0	0	0	0	0	0	0	0	0.252449	0	0.252449	0.252449	0.252449	0	0	0	0	0	0	0
MPP1	6	0	0	0	0	0	0	0	0	0	0	0	0	0	0	0	0	0	0	0	0	0	0	0	0	0	0	0	0	0	0	0	0	0	0	0	0	0	0	0	0.331293	0.331293	0	0	0	0	0	0	0
AMPD3	9	0	0	0	0	0	0	0	0	0	0	0	0	0	0	0	0	0	0	0	0	0	0	0	0	0	0.209901	0	0	0	0	0	0	0	0	0	0	0	0	0.209901	0.209901	0.209901	0	0	0	0	0	0	0
NUDT9	8	0	0	0	0	0	0	0	0	0	0	0	0	0	0	0	0	0	0	0	0	0	0	0	0	0	0.107898	0	0	0	0	0	0	0	0	0	0	0	0	0.107898	0.107898	0.107898	0	0	0	0	0	0	0
NUDT16	5	0	0	0	0	0	0	0	0	0	0	0	0	0	0	0	0	0	0	0	0	0	0	0	0	0	0	0	0	0	0	0	0	0	0	0	0	0	0	0	0.135542	0.135542	0	0	0	0	0	0	0
ITPA	3	0	0	0	0	0	0	0	0	0	0	0	0	0	0	0	0	0	0	0	0	0	0	0	0	0	0	0	0	0	0	0	0	0	0	0	0	0	0	0	0	0	0	0	0	0	0	0	0
NUDT1	3	0	0	0	0	0	0	0	0	0	0	0	0	0	0	0	0	0	0	0	0	0	0	0	0	0	0	0	0	0	0	0	0	0	0	0	0	0	0	0	0	0	0	0	0	0	0	0	0
RRM2B	3	0	0	0	0	0	0	0	0	0	0	0	0	0	0	0	0	0	0	0	0	0	0	0	0	0	0	0	0	0	0	0	0	0	0	0	0	0	0	0	0.21954	0	0	0	0	0	0	0	0
ENTPD3	3	0	0	0	0	0	0	0	0	0	0	0	0	0	0	0	0	0	0	0	0	0	0	0	0	0	0	0	0	0	0	0	0	0	0	0	0	0	0	0	0.154895	0	0	0	0	0	0	0	0
NME1	6	0	0	0	0	0	0	0	0	0	0	0	0	0	0	0	0	0	0	0	0	0	0	0	0	0	0	0	0	0	0	0	0	0	0	0	0	0.137372	0	0	0.137372	0	0	0	0	0	0	0	0
DTYMK	5	0	0	0	0	0	0	0	0	0	0	0	0	0	0	0	0	0	0	0	0	0	0	0	0	0	0	0	0	0	0	0	0	0	0	0	0	0.11511	0	0	0.11511	0	0	0	0	0	0	0	0
CMPK1	6	0	0	0	0	0	0	0	0	0	0	0	0	0	0	0	0	0	0	0	0	0	0	0	0	0	0	0	0	0	0	0	0	0	0	0	0	0.150254	0	0	0.150254	0	0	0	0	0	0	0	0
PRPSAP1	1	0	0	0	0	0	0	0	0	0	0	0	0	0	0	0	0	0	0	0	0	0	0	0	0	0	0	0	0	0	0	0	0	0	0	0	0	0	0	0	0	0	0	0	0	0	0	0	0
CNP	1	0	0	0	0	0	0	0	0	0	0	0	0	0	0	0	0	0	0	0	0	0	0	0	0	0	0	0	0	0	0	0	0	0	0	0	0	0	0	0	0	0	0	0	0	0	0	0	0
REXO2	1	0	0	0	0	0	0	0	0	0	0	0	0	0	0	0	0	0	0	0	0	0	0	0	0	0	0	0	0	0	0	0	0	0	0	0	0	0	0	0	0	0	0	0	0	0	0	0	0
GLRX	1	0	0	0	0	0	0	0	0	0	0	0	0	0	0	0	0	0	0	0	0	0	0	0	0	0	0	0	0	0	0	0	0	0	0	0	0	0	0	0	0	0	0	0	0	0	0	0	0
KARS	1	0	0	0	0	0	0	0	0	0	0	0	0	0	0	0	0	0	0	0	0	0	0	0	0	0	0	0	0	0	0	0	0	0	0	0	0	0	0	0	0	0	0	0	0	0	0	0	0
CMPK2	1	0	0	0	0	0	0	0	0	0	0	0	0	0	0	0	0	0	0	0	0	0	0	0	0	0	0	0	0	0	0	0	0	0	0	0	0	0	0	0	0	0	0	0	0	0	0	0	0
PNKP	2	0	0	0	0	0	0	0	0	0	0	0	0	0	0	0	0	0	0	0	0	0	0	0	0	0	0	0	0	0	0	0	0	0	0	0	0	0.111338	0	0	0	0	0	0	0	0	0	0	0
ADM	4	0	0	0	0	0	0	0	0	0	0	0	0.172969	0	0	0	0	0	0	0	0	0	0	0	0	0	0	0	0	0.172969	0	0	0	0	0	0	0	0	0	0	0	0	0	0	0	0	0	0	0
CACNB4	3	0	0	0	0	0	0	0	0	0.139926	0	0	0	0	0	0	0	0	0	0	0	0	0	0	0	0	0	0	0	0	0	0	0	0	0	0	0	0	0	0	0	0	0	0	0	0	0	0	0
ADCY9	2	0	0	0	0	0	0	0	0	0	0	0	0	0	0	0	0	0	0	0	0	0	0	0	0	0	0	0	0	0	0	0	0	0	0	0	0	0	0	0	0	0	0	0	0	0	0	0	0
UCN2	2	0	0	0	0	0	0	0	0	0	0	0	0	0	0	0	0	0	0	0	0	0	0	0	0	0	0	0	0	0	0	0	0	0	0	0	0	0	0	0	0	0	0	0	0	0	0	0	0
ADCY4	2	0	0	0	0	0	0	0	0	0	0	0	0	0	0	0	0	0	0	0	0	0	0	0	0	0	0	0	0	0	0	0	0	0	0	0	0	0	0	0	0	0	0	0	0	0	0	0	0
ADCY3	2	0	0	0	0	0	0	0	0	0	0	0	0	0	0	0	0	0	0	0	0	0	0	0	0	0	0	0	0	0	0	0	0	0	0	0	0	0	0	0	0	0	0	0	0	0	0	0	0
GUCA2B	2	0	0	0	0	0	0	0	0	0	0	0	0	0	0	0	0	0	0	0	0	0	0	0	0	0	0	0	0	0	0	0	0	0	0	0	0	0	0	0	0	0	0	0	0	0	0	0	0
GMPR	2	0	0	0	0	0	0	0	0	0	0	0	0	0	0	0	0	0	0	0	0	0	0	0	0	0	0	0	0	0	0	0	0	0	0	0	0	0	0	0	0	0	0	0	0	0	0	0	0
FHIT	2	0	0	0	0	0	0	0	0	0	0	0	0	0	0	0	0	0	0	0	0	0	0	0	0	0	0	0	0	0	0	0	0	0	0	0	0	0	0	0	0	0	0	0	0	0	0	0	0
RAMP2	2	0	0	0	0	0	0	0	0	0	0	0	0	0	0	0	0	0	0	0	0	0	0	0	0	0	0	0	0	0	0	0	0	0	0	0	0	0	0	0	0	0	0	0	0	0	0	0	0
NPPB	2	0	0	0	0	0	0	0	0	0	0	0	0	0	0	0	0	0	0	0	0	0	0	0	0	0	0	0	0	0	0	0	0	0	0	0	0	0	0	0	0	0	0	0	0	0	0	0	0
GUCY1A2	2	0	0	0	0	0	0	0	0	0	0	0	0	0	0	0	0	0	0	0	0	0	0	0	0	0	0	0	0	0	0	0	0	0	0	0	0	0	0	0	0	0	0	0	0	0	0	0	0
PDE4A	2	0	0	0	0	0	0	0	0	0	0	0	0	0	0	0	0	0	0	0	0	0	0	0	0	0	0	0	0	0	0	0	0	0	0	0	0	0	0	0	0	0	0	0	0	0	0	0	0
PDE11A	2	0	0	0	0	0	0	0	0	0	0	0	0	0	0	0	0	0	0	0	0	0	0	0	0	0	0	0	0	0	0	0	0	0	0	0	0	0	0	0	0	0	0	0	0	0	0	0	0
ATP2B2	2	0	0	0	0	0	0	0	0	0	0	0	0	0	0	0	0	0	0	0	0	0	0	0	0	0	0	0	0	0	0	0	0	0	0	0	0	0	0	0	0	0	0	0	0	0	0	0	0
PRKAG2	15	0	0	0	0	0	0	0	0	0	0	0	0	0.131847	0.131847	0	0	0	0	0	0	0	0	0	0	0	0	0	0.131847	0.131847	0	0	0	0	0	0	0	0	0	0	0	0	0	0	0	0	0.131847	0.131847	0.131847
ATP1B1	11	0	0	0	0	0	0	0	0	0	0	0	0	0	0	0	0	0	0	0	0	0	0	0	0	0	0	0	0	0	0	0	0	0	0	0	0	0	0	0	0	0	0	0	0	0	0	0	0
ATP6V1A	9	0	0	0	0	0	0	0	0	0	0	0	0	0	0	0	0	0	0	0	0	0	0	0	0	0	0	0	0	0	0	0	0	0	0	0	0	0	0	0	0	0	0	0	0	0	0	0	0
UCK2	4	0	0	0	0	0	0	0	0	0	0	0	0	0	0	0	0	0	0	0	0	0	0	0	0	0	0	0	0	0	0	0	0	0	0	0	0	0	0	0	0	0	0	0	0	0	0	0	0
TK2	3	0	0	0	0	0	0	0	0	0	0	0	0	0	0	0	0	0	0	0	0	0	0	0	0	0	0	0	0	0	0	0	0	0	0	0	0	0	0	0	0	0	0	0	0	0	0	0	0
PDCL	2	0	0	0	0	0	0	0	0	0	0	0	0	0	0	0	0	0	0	0	0	0	0	0	0	0	0	0	0	0	0	0	0	0	0	0	0	0	0	0	0	0	0	0	0	0	0	0	0
CDA	3	0	0	0	0	0	0	0	0	0	0	0	0	0	0	0	0	0	0	0	0	0	0	0	0	0	0.081427	0	0	0	0	0	0	0	0	0	0	0	0	0	0	0	0	0	0	0	0	0	0
UPP1	4	0	0	0	0	0	0	0	0	0	0	0	0	0	0	0	0	0	0	0	0	0	0	0	0	0	0.102903	0	0	0	0	0	0	0	0	0	0	0	0	0	0	0	0	0	0	0	0	0	0
ENPP4	4	0	0	0	0	0	0	0	0	0	0	0	0	0	0	0	0	0	0	0	0	0	0	0	0	0	0.102003	0	0	0	0	0	0	0	0	0	0	0	0	0	0	0	0	0	0	0	0	0	0
ADAL	4	0	0	0	0	0	0	0	0	0	0	0	0	0	0	0	0	0	0	0	0	0	0	0	0	0	0.084279	0	0	0	0	0	0	0	0	0	0	0	0	0	0	0	0	0	0	0	0	0	0
HDDC3	3	0	0	0	0	0	0	0	0	0	0	0	0	0	0	0	0	0	0	0	0	0	0	0	0	0	0	0	0	0	0	0	0	0	0	0	0	0	0	0	0	0	0	0	0	0	0	0	0
DNMT3A	3	0	0	0	0	0	0	0	0	0	0	0	0	0	0	0	0	0	0	0	0	0	0	0	0	0	0	0	0	0	0	0	0	0	0	0	0	0	0	0	0	0	0	0	0	0	0	0	0
ACPP	3	0	0	0	0	0	0	0	0	0	0	0	0	0	0	0	0	0	0	0	0	0	0	0	0	0	0	0	0	0	0	0	0	0	0	0	0	0	0	0	0	0	0	0	0	0	0	0	0
RHOQ	4	0	0	0	0	0	0	0	0	0	0	0	0	0	0	0	0	0	0	0	0	0	0	0	0	0	0	0	0	0	0	0	0	0	0	0	0	0	0	0	0	0	0	0	0	0	0	0	0
LDHC	6	0	0	0	0	0	0	0	0	0	0	0	0	0	0	0	0	0	0	0	0	0	0	0	0	0	0	0	0	0.103382	0	0	0	0	0	0	0	0	0	0	0	0	0	0	0	0	0	0	0
HSPA1A	5	0	0	0	0	0	0	0	0	0	0	0	0	0	0	0	0	0	0	0	0	0	0	0	0	0	0	0	0	0	0	0	0	0	0	0	0	0	0	0	0	0	0	0	0	0	0	0	0
CTNS	5	0	0	0	0	0	0	0	0	0	0	0	0	0	0	0	0	0	0	0	0	0	0	0	0	0	0	0	0	0	0	0	0	0	0	0	0	0	0	0	0	0	0	0	0	0	0	0	0
HSPA8	5	0	0	0	0	0	0	0	0	0	0	0	0	0	0	0	0	0	0	0	0	0	0	0	0	0	0	0	0	0	0	0	0	0	0	0	0	0	0	0	0	0	0	0	0	0	0	0	0
CHCHD10	7	0	0	0	0	0	0	0	0	0	0	0	0	0	0	0	0	0	0	0	0	0	0	0	0	0	0	0	0	0	0	0	0	0	0	0	0	0	0	0	0	0	0	0	0	0	0	0	0
OLA1	3	0	0	0	0	0	0	0	0	0	0	0	0	0	0	0	0	0	0	0	0	0	0	0	0	0	0	0	0	0	0	0	0	0	0	0	0	0	0	0	0	0	0	0	0	0	0	0	0
ADSSL1	5	0	0	0	0	0	0	0	0	0	0	0	0	0	0	0	0	0	0	0	0	0	0.162729	0	0	0	0	0	0	0	0	0	0	0	0	0	0	0	0	0	0	0	0	0	0	0	0	0	0
SDHAF2	5	0	0	0	0	0	0	0	0	0	0	0	0	0	0	0	0	0	0	0	0	0	0	0	0	0	0	0	0	0	0	0	0	0	0	0	0	0	0	0	0	0	0	0	0	0	0	0	0
GMPS	4	0	0	0	0	0	0	0	0	0	0	0	0	0	0	0	0	0	0	0	0	0	0	0	0	0	0	0	0	0	0	0	0	0	0	0	0	0	0	0	0	0	0	0	0	0	0	0	0
IMPDH1	4	0	0	0	0	0	0	0	0	0	0	0	0	0	0	0	0	0	0	0	0	0	0	0	0	0	0	0	0	0	0	0	0	0	0	0	0	0	0	0	0	0	0	0	0	0	0	0	0
GMPR2	4	0	0	0	0	0	0	0	0	0	0	0	0	0	0	0	0	0	0	0	0	0	0	0	0	0	0	0	0	0	0	0	0	0	0	0	0	0	0	0	0	0	0	0	0	0	0	0	0
FXN	20	0	0	0	0	0	0	0.152647	0	0.152647	0	0	0	0	0	0	0	0	0	0	0	0	0	0	0	0	0	0.152647	0	0	0	0	0	0	0	0	0	0	0	0	0	0	0	0.152647	0.152647	0	0	0	0
COX10	22	0	0	0	0	0	0	0	0	0	0	0	0	0	0	0	0	0	0	0	0	0	0	0	0	0	0	0	0	0	0	0	0	0	0	0	0	0	0	0	0	0	0	0.145504	0.145504	0	0	0	0
NDUFA9	19	0	0	0	0	0	0	0	0	0	0	0	0	0	0	0	0	0	0	0	0	0	0	0	0	0	0	0	0	0.174305	0	0	0	0.174305	0	0	0	0	0	0	0	0	0	0.174305	0.174305	0.174305	0	0	0
NDUFAB1	14	0	0	0	0	0	0	0	0	0	0	0	0	0	0	0	0	0	0.081874	0.081874	0	0	0	0	0	0	0	0	0	0.081874	0	0	0	0	0	0	0	0	0	0	0	0	0	0	0	0	0	0	0
NDUFV1	12	0	0	0	0	0	0	0	0	0	0	0	0	0	0	0	0	0	0	0	0	0	0	0	0	0	0	0	0	0	0	0	0	0	0	0	0	0	0	0	0	0	0	0	0	0	0	0	0
NDUFB5	11	0	0	0	0	0	0	0	0	0	0	0	0	0	0	0	0	0	0	0	0	0	0	0	0	0	0	0	0	0	0	0	0	0	0	0	0	0	0	0	0	0	0	0	0	0	0	0	0
NDUFA10	11	0	0	0	0	0	0	0	0	0	0	0	0	0	0	0	0	0	0	0	0	0	0	0	0	0	0	0	0	0	0	0	0	0	0	0	0	0	0	0	0	0	0	0	0	0	0	0	0
NDUFB11	11	0	0	0	0	0	0	0	0	0	0	0	0	0	0	0	0	0	0	0	0	0	0	0	0	0	0	0	0	0	0	0	0	0	0	0	0	0	0	0	0	0	0	0	0	0	0	0	0
NDUFS8	11	0	0	0	0	0	0	0	0	0	0	0	0	0	0	0	0	0	0	0	0	0	0	0	0	0	0	0	0	0	0	0	0	0	0	0	0	0	0	0	0	0	0	0	0	0	0	0	0
NDUFS4	11	0	0	0	0	0	0	0	0	0	0	0	0	0	0	0	0	0	0	0	0	0	0	0	0	0	0	0	0	0	0	0	0	0	0	0	0	0	0	0	0	0	0	0	0	0	0	0	0
NDUFC1	12	0	0	0	0	0	0	0	0	0	0	0	0	0	0	0	0	0	0	0	0	0	0	0	0	0	0	0	0	0	0	0	0	0	0	0	0	0	0	0	0	0	0	0	0	0	0	0	0
NDUFB9	12	0	0	0	0	0	0	0	0	0	0	0	0	0	0	0	0	0	0	0	0	0	0	0	0	0	0	0	0	0	0	0	0	0	0	0	0	0	0	0	0	0	0	0	0	0	0	0	0
NDUFB6	12	0	0	0	0	0	0	0	0	0	0	0	0	0	0	0	0	0	0	0	0	0	0	0	0	0	0	0	0	0	0	0	0	0	0	0	0	0	0	0	0	0	0	0	0	0	0	0	0
NDUFB4	12	0	0	0	0	0	0	0	0	0	0	0	0	0	0	0	0	0	0	0	0	0	0	0	0	0	0	0	0	0	0	0	0	0	0	0	0	0	0	0	0	0	0	0	0	0	0	0	0
NDUFA8	12	0	0	0	0	0	0	0	0	0	0	0	0	0	0	0	0	0	0	0	0	0	0	0	0	0	0	0	0	0	0	0	0	0	0	0	0	0	0	0	0	0	0	0	0	0	0	0	0
NDUFA7	12	0	0	0	0	0	0	0	0	0	0	0	0	0	0	0	0	0	0	0	0	0	0	0	0	0	0	0	0	0	0	0	0	0	0	0	0	0	0	0	0	0	0	0	0	0	0	0	0
NDUFA6	12	0	0	0	0	0	0	0	0	0	0	0	0	0	0	0	0	0	0	0	0	0	0	0	0	0	0	0	0	0	0	0	0	0	0	0	0	0	0	0	0	0	0	0	0	0	0	0	0
NDUFA12	12	0	0	0	0	0	0	0	0	0	0	0	0	0	0	0	0	0	0	0	0	0	0	0	0	0	0	0	0	0	0	0	0	0	0	0	0	0	0	0	0	0	0	0	0	0	0	0	0
NDUFV3	12	0	0	0	0	0	0	0	0	0	0	0	0	0	0	0	0	0	0	0	0	0	0	0	0	0	0	0	0	0	0	0	0	0	0	0	0	0	0	0	0	0	0	0	0	0	0	0	0
NDUFV2	12	0	0	0	0	0	0	0	0	0	0	0	0	0	0	0	0	0	0	0	0	0	0	0	0	0	0	0	0	0	0	0	0	0	0	0	0	0	0	0	0	0	0	0	0	0	0	0	0
NDUFS7	12	0	0	0	0	0	0	0	0	0	0	0	0	0	0	0	0	0	0	0	0	0	0	0	0	0	0	0	0	0	0	0	0	0	0	0	0	0	0	0	0	0	0	0	0	0	0	0	0
NDUFS3	12	0	0	0	0	0	0	0	0	0	0	0	0	0	0	0	0	0	0	0	0	0	0	0	0	0	0	0	0	0	0	0	0	0	0	0	0	0	0	0	0	0	0	0	0	0	0	0	0
NDUFS2	12	0	0	0	0	0	0	0	0	0	0	0	0	0	0	0	0	0	0	0	0	0	0	0	0	0	0	0	0	0	0	0	0	0	0	0	0	0	0	0	0	0	0	0	0	0	0	0	0
NDUFS1	12	0	0	0	0	0	0	0	0	0	0	0	0	0	0	0	0	0	0	0	0	0	0	0	0	0	0	0	0	0	0	0	0	0	0	0	0	0	0	0	0	0	0	0	0	0	0	0	0
SLC25A25	8	0	0	0	0	0	0	0	0	0	0	0	0	0	0	0	0	0	0	0	0	0	0	0	0	0	0	0	0	0	0	0	0	0	0	0	0	0	0	0	0	0	0	0	0	0	0	0	0
PMPCB	10	0	0	0	0	0	0	0	0	0	0	0	0	0	0	0	0	0	0	0	0	0	0	0	0	0	0	0	0	0	0	0	0	0	0	0	0	0	0	0	0	0	0	0	0	0	0	0	0
UQCRC2	12	0	0	0	0	0	0	0.119768	0	0	0	0	0	0	0	0	0	0	0	0	0	0	0	0	0	0	0	0	0	0	0	0	0	0	0	0	0	0	0	0	0	0	0	0	0	0	0	0	0
SDHC	11	0	0	0	0	0	0	0	0	0	0	0	0	0	0	0	0	0	0	0	0	0	0	0	0	0	0	0	0	0	0	0	0	0	0	0	0	0	0	0	0	0	0	0	0	0	0	0	0
CYC1	10	0	0	0	0	0	0	0	0	0	0	0	0	0	0	0	0	0	0	0	0	0	0	0	0	0	0	0	0	0	0	0	0	0	0	0	0	0	0	0	0	0	0	0	0	0	0	0	0
CYCS	12	0	0	0	0	0	0	0.179213	0	0	0	0	0	0	0	0	0	0	0	0	0	0	0	0	0	0	0	0	0	0	0	0	0	0	0	0	0	0	0	0	0	0	0	0	0	0	0	0	0
COX8A	11	0	0	0	0	0	0	0	0	0	0	0	0	0	0	0	0	0	0	0	0	0	0	0	0	0	0	0	0	0	0	0	0	0	0	0	0	0	0	0	0	0	0	0	0	0	0	0	0
COX4I2	12	0	0	0	0	0	0	0	0	0	0	0	0	0	0	0	0	0	0	0	0	0	0	0	0	0	0	0	0	0	0	0	0	0	0	0	0	0	0	0	0	0	0	0	0	0	0	0	0
COX5B	12	0	0	0	0	0	0	0	0	0	0	0	0	0	0	0	0	0	0	0	0	0	0	0	0	0	0	0	0	0	0	0	0	0	0	0	0	0	0	0	0	0	0	0	0	0	0	0	0
COX6C	12	0	0	0	0	0	0	0	0	0	0	0	0	0	0	0	0	0	0	0	0	0	0	0	0	0	0	0	0	0	0	0	0	0	0	0	0	0	0	0	0	0	0	0	0	0	0	0	0
UQCRC1	15	0	0	0	0	0	0	0.175409	0	0	0	0	0	0	0	0	0	0	0	0	0	0	0	0	0	0	0	0	0	0	0	0	0	0	0	0	0	0	0	0	0	0	0	0	0	0	0	0	0
UQCRB	15	0	0	0	0	0	0	0	0	0	0	0	0	0	0	0	0	0	0	0	0	0	0	0	0	0	0	0	0	0	0	0	0	0	0	0	0	0	0	0	0	0	0	0	0	0	0	0	0
UQCR10	14	0	0	0	0	0	0	0	0	0	0	0	0	0	0	0	0	0	0	0	0	0	0	0	0	0	0	0	0	0	0	0	0	0	0	0	0	0	0	0	0	0	0	0	0	0	0	0	0
UQCRQ	12	0	0	0	0	0	0	0	0	0	0	0	0	0	0	0	0	0	0	0	0	0	0	0	0	0	0	0	0	0	0	0	0	0	0	0	0	0	0	0	0	0	0	0	0	0	0	0	0
NDUFA4	14	0	0	0	0	0	0	0	0	0	0	0	0	0	0	0	0	0	0	0	0	0	0	0	0	0	0	0	0	0	0	0	0	0	0	0	0	0	0	0	0	0	0	0	0	0	0	0	0
COX7B	14	0	0	0	0	0	0	0	0	0	0	0	0	0	0	0	0	0	0	0	0	0	0	0	0	0	0	0	0	0	0	0	0	0	0	0	0	0	0	0	0	0	0	0	0	0	0	0	0
COX7C	14	0	0	0	0	0	0	0	0	0	0	0	0	0	0	0	0	0	0	0	0	0	0	0	0	0	0	0	0	0	0	0	0	0	0	0	0	0	0	0	0	0	0	0	0	0	0	0	0
COX5A	14	0	0	0	0	0	0	0	0	0	0	0	0	0	0	0	0	0	0	0	0	0	0	0	0	0	0	0	0	0	0	0	0	0	0	0	0	0	0	0	0	0	0	0	0	0	0	0	0
COX6A1	14	0	0	0	0	0	0	0	0	0	0	0	0	0	0	0	0	0	0	0	0	0	0	0	0	0	0	0	0	0	0	0	0	0	0	0	0	0	0	0	0	0	0	0	0	0	0	0	0
UQCRFS1	13	0	0	0	0	0	0	0	0	0	0	0	0	0	0	0	0	0	0	0	0	0	0	0	0	0	0	0	0	0	0	0	0	0	0	0	0	0	0	0	0	0	0	0	0	0	0	0	0
UQCRHL	13	0	0	0	0	0	0	0	0	0	0	0	0	0	0	0	0	0	0	0	0	0	0	0	0	0	0	0	0	0	0	0	0	0	0	0	0	0	0	0	0	0	0	0	0	0	0	0	0
INPP5F	3	0	0	0	0	0	0	0	0	0	0.116773	0	0	0	0	0	0	0	0	0	0.116773	0.116773	0	0	0	0	0	0	0	0	0	0	0	0	0	0	0	0	0	0	0	0	0	0	0	0	0	0	0
SYNJ2	2	0	0	0	0	0	0	0	0	0	0	0	0	0	0	0	0	0	0	0	0.109085	0.109085	0	0	0	0	0	0	0	0	0	0	0	0	0	0	0	0	0	0	0	0	0	0	0	0	0	0	0
INPP5A	2	0	0	0	0	0	0	0	0	0	0	0	0	0	0	0	0	0	0	0	0.242636	0.242636	0	0	0	0	0	0	0	0	0	0	0	0	0	0	0	0	0	0	0	0	0	0	0	0	0	0	0
INPP5J	2	0	0	0	0	0	0	0	0	0	0	0	0	0	0	0	0	0	0	0	0.195797	0.195797	0	0	0	0	0	0	0	0	0	0	0	0	0	0	0	0	0	0	0	0	0	0	0	0	0	0	0
MTMR2	3	0	0	0	0	0	0	0	0	0	0	0	0	0	0	0	0	0	0	0	0.200141	0.200141	0	0	0	0	0	0	0	0	0	0	0	0	0	0	0	0	0	0	0	0	0	0	0	0	0.200141	0	0
SYNJ1	3	0	0	0	0	0	0	0	0	0	0	0	0	0	0	0	0	0	0	0	0.124253	0.124253	0	0	0	0	0	0	0	0	0	0	0	0	0	0	0	0	0	0	0	0	0	0	0	0	0.124253	0	0
INPP5E	3	0	0	0	0	0	0	0	0	0	0	0	0	0	0	0	0	0	0	0	0.118414	0.118414	0	0	0	0	0	0	0	0	0	0	0	0	0	0	0	0	0	0	0	0	0	0	0	0	0.118414	0	0
INPP5K	3	0	0	0	0	0	0	0	0	0	0	0	0	0	0	0	0	0	0	0	0.111341	0.111341	0	0	0	0	0	0	0	0	0	0	0	0	0	0	0	0	0	0	0	0	0	0	0	0	0.111341	0	0
ABHD10	2	0	0	0	0	0	0	0	0	0	0	0	0	0	0	0	0	0	0	0	0	0	0	0	0	0	0	0	0	0	0	0	0	0	0	0	0	0	0	0	0	0	0	0	0	0	0.131796	0	0
FUCA2	1	0	0	0	0	0	0	0	0	0	0	0	0	0	0	0	0	0	0	0	0	0	0	0	0	0	0	0	0	0	0	0	0	0	0	0	0	0	0	0	0	0	0	0	0	0	0	0	0
LCTL	1	0	0	0	0	0	0	0	0	0	0	0	0	0	0	0	0	0	0	0	0	0	0	0	0	0	0	0	0	0	0	0	0	0	0	0	0	0	0	0	0	0	0	0	0	0	0	0	0
GBA2	1	0	0	0	0	0	0	0	0	0	0	0	0	0	0	0	0	0	0	0	0	0	0	0	0	0	0	0	0	0	0	0	0	0	0	0	0	0	0	0	0	0	0	0	0	0	0	0	0
TH	1	0	0	0	0	0	0	0	0	0	0	0	0	0	0	0	0	0	0	0	0	0	0	0	0	0	0	0	0	0	0	0	0	0	0	0	0	0	0	0	0	0	0	0	0	0	0	0	0
NANS	2	0	0	0	0	0	0	0	0	0	0	0	0	0	0	0	0	0	0	0	0	0	0	0	0	0	0	0	0	0	0	0	0.157833	0	0	0	0	0	0	0	0	0	0	0	0	0	0.157833	0	0
SLC2A1	3	0	0	0	0	0	0	0	0	0	0	0	0	0	0	0	0	0	0	0	0	0	0	0	0	0.226415	0	0	0	0	0	0	0.226415	0	0	0	0	0	0	0	0	0	0	0	0	0	0.226415	0	0
GANC	1	0	0	0	0	0	0	0	0	0	0	0	0	0	0	0	0	0	0	0	0	0	0	0	0	0	0	0	0	0	0	0	0	0	0	0	0	0	0	0	0	0	0	0	0	0	0.144323	0	0
GNPTG	1	0	0	0	0	0	0	0	0	0	0	0	0	0	0	0	0	0	0	0	0	0	0	0	0	0	0	0	0	0	0	0	0	0	0	0	0	0	0	0	0	0	0	0	0	0	0.138238	0	0
IPPK	1	0	0	0	0	0	0	0	0	0	0	0	0	0	0	0	0	0	0	0	0	0	0	0	0	0	0	0	0	0	0	0	0	0	0	0	0	0	0	0	0	0	0	0	0	0	0.138728	0	0
MOGAT2	1	0	0	0	0	0	0	0	0	0	0	0	0	0	0	0	0	0	0	0	0	0	0	0	0	0	0	0	0	0	0	0	0	0	0	0	0	0	0	0	0	0	0	0	0	0	0.122598	0	0
MOGAT1	1	0	0	0	0	0	0	0	0	0	0	0	0	0	0	0	0	0	0	0	0	0	0	0	0	0	0	0	0	0	0	0	0	0	0	0	0	0	0	0	0	0	0	0	0	0	0.187214	0	0
RBKS	1	0	0	0	0	0	0	0	0	0	0	0	0	0	0	0	0	0	0	0	0	0	0	0	0	0	0	0	0	0	0	0	0	0	0	0	0	0	0	0	0	0	0	0	0	0	0.129987	0	0
GLB1	1	0	0	0	0	0	0	0	0	0	0	0	0	0	0	0	0	0	0	0	0	0	0	0	0	0	0	0	0	0	0	0	0	0	0	0	0	0	0	0	0	0	0	0	0	0	0.196711	0	0
NEFL	2	0.274231	0.274231	0	0	0	0	0	0	0	0	0	0	0	0	0	0	0	0	0	0	0	0	0	0	0	0	0	0	0	0	0	0	0	0	0	0	0	0	0	0	0	0	0	0	0	0	0	0
NEFM	2	0.301773	0.301773	0	0	0	0	0	0	0	0	0	0	0	0	0	0	0	0	0	0	0	0	0	0	0	0	0	0	0	0	0	0	0	0	0	0	0	0	0	0	0	0	0	0	0	0	0	0
NEFH	2	0.343877	0.343877	0	0	0	0	0	0	0	0	0	0	0	0	0	0	0	0	0	0	0	0	0	0	0	0	0	0	0	0	0	0	0	0	0	0	0	0	0	0	0	0	0	0	0	0	0	0
DST	1	0	0.12233	0	0	0	0	0	0	0	0	0	0	0	0	0	0	0	0	0	0	0	0	0	0	0	0	0	0	0	0	0	0	0	0	0	0	0	0	0	0	0	0	0	0	0	0	0	0
KRT3	1	0	0.116962	0	0	0	0	0	0	0	0	0	0	0	0	0	0	0	0	0	0	0	0	0	0	0	0	0	0	0	0	0	0	0	0	0	0	0	0	0	0	0	0	0	0	0	0	0	0
PRPH	1	0	0.229721	0	0	0	0	0	0	0	0	0	0	0	0	0	0	0	0	0	0	0	0	0	0	0	0	0	0	0	0	0	0	0	0	0	0	0	0	0	0	0	0	0	0	0	0	0	0
TCHH	1	0	0.13201	0	0	0	0	0	0	0	0	0	0	0	0	0	0	0	0	0	0	0	0	0	0	0	0	0	0	0	0	0	0	0	0	0	0	0	0	0	0	0	0	0	0	0	0	0	0
INA	1	0	0.211348	0	0	0	0	0	0	0	0	0	0	0	0	0	0	0	0	0	0	0	0	0	0	0	0	0	0	0	0	0	0	0	0	0	0	0	0	0	0	0	0	0	0	0	0	0	0
LRP5	1	0	0	0	0	0	0	0	0	0	0	0	0	0	0	0	0	0	0	0	0	0	0	0	0	0	0	0	0	0	0	0	0	0	0.13164	0	0	0	0	0	0	0	0	0	0	0	0	0	0
TFAM	1	0	0	0	0	0	0	0	0	0	0	0	0	0	0	0	0	0	0	0	0	0	0	0	0	0	0	0	0	0	0	0	0	0	0	0	0	0	0	0	0	0	0	0	0	0	0	0	0
AIFM1	3	0	0	0	0	0	0	0.241489	0	0	0	0	0	0	0	0	0	0	0	0	0	0	0	0	0	0	0	0	0	0	0	0	0	0	0	0	0	0	0	0	0	0	0	0	0	0	0	0	0
ECSIT	2	0	0	0	0	0	0	0	0	0	0	0	0	0	0	0	0	0	0	0	0	0	0	0	0	0	0	0	0	0	0	0	0	0	0	0	0	0	0	0	0	0	0	0	0	0	0	0	0
TIMMDC1	2	0	0	0	0	0	0	0	0	0	0	0	0	0	0	0	0	0	0	0	0	0	0	0	0	0	0	0	0	0	0	0	0	0	0	0	0	0	0	0	0	0	0	0	0	0	0	0	0
FOXRED1	2	0	0	0	0	0	0	0	0	0	0	0	0	0	0	0	0	0	0	0	0	0	0	0	0	0	0	0	0	0	0	0	0	0	0	0	0	0	0	0	0	0	0	0	0	0	0	0	0
NDUFAF4	2	0	0	0	0	0	0	0	0	0	0	0	0	0	0	0	0	0	0	0	0	0	0	0	0	0	0	0	0	0	0	0	0	0	0	0	0	0	0	0	0	0	0	0	0	0	0	0	0
NDUFAF3	2	0	0	0	0	0	0	0	0	0	0	0	0	0	0	0	0	0	0	0	0	0	0	0	0	0	0	0	0	0	0	0	0	0	0	0	0	0	0	0	0	0	0	0	0	0	0	0	0
ITGB1	2	0	0	0.18112	0.18112	0	0	0	0	0	0	0	0	0	0	0	0	0	0	0	0	0	0	0	0	0	0	0	0	0	0	0	0	0	0	0	0	0	0	0	0	0	0	0	0	0	0	0	0
TAL1	1	0	0	0	0.135346	0	0	0	0	0	0	0	0	0	0	0	0	0	0	0	0	0	0	0	0	0	0	0	0	0	0	0	0	0	0	0	0	0	0	0	0	0	0	0	0	0	0	0	0
ITGA2	1	0	0	0	0.142217	0	0	0	0	0	0	0	0	0	0	0	0	0	0	0	0	0	0	0	0	0	0	0	0	0	0	0	0	0	0	0	0	0	0	0	0	0	0	0	0	0	0	0	0
ITGA8	1	0	0	0	0.306213	0	0	0	0	0	0	0	0	0	0	0	0	0	0	0	0	0	0	0	0	0	0	0	0	0	0	0	0	0	0	0	0	0	0	0	0	0	0	0	0	0	0	0	0
FOXF1	1	0	0	0	0.157164	0	0	0	0	0	0	0	0	0	0	0	0	0	0	0	0	0	0	0	0	0	0	0	0	0	0	0	0	0	0	0	0	0	0	0	0	0	0	0	0	0	0	0	0
FOXC2	1	0	0	0	0.137826	0	0	0	0	0	0	0	0	0	0	0	0	0	0	0	0	0	0	0	0	0	0	0	0	0	0	0	0	0	0	0	0	0	0	0	0	0	0	0	0	0	0	0	0
INHBA	1	0	0	0	0.231151	0	0	0	0	0	0	0	0	0	0	0	0	0	0	0	0	0	0	0	0	0	0	0	0	0	0	0	0	0	0	0	0	0	0	0	0	0	0	0	0	0	0	0	0
FGFR2	1	0	0	0	0.17747	0	0	0	0	0	0	0	0	0	0	0	0	0	0	0	0	0	0	0	0	0	0	0	0	0	0	0	0	0	0	0	0	0	0	0	0	0	0	0	0	0	0	0	0
PERP	2	0	0	0.201711	0	0	0	0.201711	0	0	0	0	0	0	0	0	0	0	0	0	0	0	0	0	0	0	0	0	0	0	0	0	0	0	0	0	0	0	0	0	0	0	0	0	0	0	0	0	0
ITGAV	1	0	0	0.221688	0	0	0	0	0	0	0	0	0	0	0	0	0	0	0	0	0	0	0	0	0	0	0	0	0	0	0	0	0	0	0	0	0	0	0	0	0	0	0	0	0	0	0	0	0
ITGA7	1	0	0	0.27956	0	0	0	0	0	0	0	0	0	0	0	0	0	0	0	0	0	0	0	0	0	0	0	0	0	0	0	0	0	0	0	0	0	0	0	0	0	0	0	0	0	0	0	0	0
NFASC	1	0	0	0.12941	0	0	0	0	0	0	0	0	0	0	0	0	0	0	0	0	0	0	0	0	0	0	0	0	0	0	0	0	0	0	0	0	0	0	0	0	0	0	0	0	0	0	0	0	0
PARVA	1	0	0	0.163126	0	0	0	0	0	0	0	0	0	0	0	0	0	0	0	0	0	0	0	0	0	0	0	0	0	0	0	0	0	0	0	0	0	0	0	0	0	0	0	0	0	0	0	0	0
MADCAM1	1	0	0	0.254279	0	0	0	0	0	0	0	0	0	0	0	0	0	0	0	0	0	0	0	0	0	0	0	0	0	0	0	0	0	0	0	0	0	0	0	0	0	0	0	0	0	0	0	0	0
PDCD6	2	0	0	0	0	0.135928	0	0.135928	0	0	0	0	0	0	0	0	0	0	0	0	0	0	0	0	0	0	0	0	0	0	0	0	0	0	0	0	0	0	0	0	0	0	0	0	0	0	0	0	0
HIF1A	2	0	0	0	0	0.146685	0	0	0	0	0	0	0	0	0	0	0	0	0	0	0	0	0	0	0	0	0	0.146685	0	0	0	0	0	0	0	0	0	0	0	0	0	0	0	0	0	0	0	0	0
PRKCB	1	0	0	0	0	0.228301	0	0	0	0	0	0	0	0	0	0	0	0	0	0	0	0	0	0	0	0	0	0	0	0	0	0	0	0	0	0	0	0	0	0	0	0	0	0	0	0	0	0	0
FZD4	1	0	0	0	0	0.169957	0	0	0	0	0	0	0	0	0	0	0	0	0	0	0	0	0	0	0	0	0	0	0	0	0	0	0	0	0	0	0	0	0	0	0	0	0	0	0	0	0	0	0
MYOF	1	0	0	0	0	0.216775	0	0	0	0	0	0	0	0	0	0	0	0	0	0	0	0	0	0	0	0	0	0	0	0	0	0	0	0	0	0	0	0	0	0	0	0	0	0	0	0	0	0	0
FGF9	1	0	0	0	0	0.20894	0	0	0	0	0	0	0	0	0	0	0	0	0	0	0	0	0	0	0	0	0	0	0	0	0	0	0	0	0	0	0	0	0	0	0	0	0	0	0	0	0	0	0
FLT1	1	0	0	0	0	0.14119	0	0	0	0	0	0	0	0	0	0	0	0	0	0	0	0	0	0	0	0	0	0	0	0	0	0	0	0	0	0	0	0	0	0	0	0	0	0	0	0	0	0	0
VEGFC	1	0	0	0	0	0.137266	0	0	0	0	0	0	0	0	0	0	0	0	0	0	0	0	0	0	0	0	0	0	0	0	0	0	0	0	0	0	0	0	0	0	0	0	0	0	0	0	0	0	0
VEGFA	1	0	0	0	0	0.157347	0	0	0	0	0	0	0	0	0	0	0	0	0	0	0	0	0	0	0	0	0	0	0	0	0	0	0	0	0	0	0	0	0	0	0	0	0	0	0	0	0	0	0
TMEM204	1	0	0	0	0	0.208024	0	0	0	0	0	0	0	0	0	0	0	0	0	0	0	0	0	0	0	0	0	0	0	0	0	0	0	0	0	0	0	0	0	0	0	0	0	0	0	0	0	0	0
HTRA2	2	0	0	0	0	0	0	0.134088	0	0.134088	0	0	0	0	0	0	0	0	0	0	0	0	0	0	0	0	0	0	0	0	0	0	0	0	0	0	0	0	0	0	0	0	0	0	0	0	0	0	0
ABHD12	2	0	0	0	0	0	0	0	0	0.302741	0.302741	0	0	0	0	0	0	0	0	0	0	0	0	0	0	0	0	0	0	0	0	0	0	0	0	0	0	0	0	0	0	0	0	0	0	0	0	0	0
NPC1	1	0	0	0	0	0	0	0	0	0.13515	0	0	0	0	0	0	0	0	0	0	0	0	0	0	0	0	0	0	0	0	0	0	0	0	0	0	0	0	0	0	0	0	0	0	0	0	0	0	0
GLRB	1	0	0	0	0	0	0	0	0	0.131798	0	0	0	0	0	0	0	0	0	0	0	0	0	0	0	0	0	0	0	0	0	0	0	0	0	0	0	0	0	0	0	0	0	0	0	0	0	0	0
CEND1	1	0	0	0	0	0	0	0	0	0.150197	0	0	0	0	0	0	0	0	0	0	0	0	0	0	0	0	0	0	0	0	0	0	0	0	0	0	0	0	0	0	0	0	0	0	0	0	0	0	0
CNTN2	1	0	0	0	0	0	0	0	0	0.10713	0	0	0	0	0	0	0	0	0	0	0	0	0	0	0	0	0	0	0	0	0	0	0	0	0	0	0	0	0	0	0	0	0	0	0	0	0	0	0
CHD7	1	0	0	0	0	0	0	0	0	0.121069	0	0	0	0	0	0	0	0	0	0	0	0	0	0	0	0	0	0	0	0	0	0	0	0	0	0	0	0	0	0	0	0	0	0	0	0	0	0	0
ZIC1	1	0	0	0	0	0	0	0	0	0.168762	0	0	0	0	0	0	0	0	0	0	0	0	0	0	0	0	0	0	0	0	0	0	0	0	0	0	0	0	0	0	0	0	0	0	0	0	0	0	0
LHB	4	0	0	0	0	0	0	0.101249	0.101249	0	0	0	0.101249	0	0	0	0	0	0	0	0	0	0	0	0	0	0	0	0	0.101249	0	0	0	0	0	0	0	0	0	0	0	0	0	0	0	0	0	0	0
BACE2	3	0	0	0	0	0	0.313485	0.313485	0.313485	0	0	0	0	0	0	0	0	0	0	0	0	0	0	0	0	0	0	0	0	0	0	0	0	0	0	0	0	0	0	0	0	0	0	0	0	0	0	0	0
ACE	2	0	0	0	0	0	0	0.114276	0.114276	0	0	0	0	0	0	0	0	0	0	0	0	0	0	0	0	0	0	0	0	0	0	0	0	0	0	0	0	0	0	0	0	0	0	0	0	0	0	0	0
PCSK2	2	0	0	0	0	0	0	0.087718	0.087718	0	0	0	0	0	0	0	0	0	0	0	0	0	0	0	0	0	0	0	0	0	0	0	0	0	0	0	0	0	0	0	0	0	0	0	0	0	0	0	0
PCSK1	2	0	0	0	0	0	0	0.135331	0.135331	0	0	0	0	0	0	0	0	0	0	0	0	0	0	0	0	0	0	0	0	0	0	0	0	0	0	0	0	0	0	0	0	0	0	0	0	0	0	0	0
CTSZ	2	0	0	0	0	0	0	0.411567	0.411567	0	0	0	0	0	0	0	0	0	0	0	0	0	0	0	0	0	0	0	0	0	0	0	0	0	0	0	0	0	0	0	0	0	0	0	0	0	0	0	0
PCSK6	2	0	0	0	0	0	0	0.189661	0.189661	0	0	0	0	0	0	0	0	0	0	0	0	0	0	0	0	0	0	0	0	0	0	0	0	0	0	0	0	0	0	0	0	0	0	0	0	0	0	0	0
ATP6AP2	2	0	0	0	0	0	0	0.160631	0.160631	0	0	0	0	0	0	0	0	0	0	0	0	0	0	0	0	0	0	0	0	0	0	0	0	0	0	0	0	0	0	0	0	0	0	0	0	0	0	0	0
CDKN1B	2	0	0	0	0	0	0	0.136351	0	0	0	0	0	0	0	0	0	0	0	0	0	0	0	0	0	0	0	0	0	0	0	0	0	0	0	0	0	0	0	0	0	0	0	0	0	0	0	0	0
IFT172	1	0	0	0	0	0	0	0.155893	0	0	0	0	0	0	0	0	0	0	0	0	0	0	0	0	0	0	0	0	0	0	0	0	0	0	0	0	0	0	0	0	0	0	0	0	0	0	0	0	0
NCSTN	1	0	0	0	0	0	0	0.101807	0	0	0	0	0	0	0	0	0	0	0	0	0	0	0	0	0	0	0	0	0	0	0	0	0	0	0	0	0	0	0	0	0	0	0	0	0	0	0	0	0
SERPINH1	1	0	0	0	0	0	0	0.126784	0	0	0	0	0	0	0	0	0	0	0	0	0	0	0	0	0	0	0	0	0	0	0	0	0	0	0	0	0	0	0	0	0	0	0	0	0	0	0	0	0
RHBDL3	1	0	0	0	0	0	0	0.227891	0	0	0	0	0	0	0	0	0	0	0	0	0	0	0	0	0	0	0	0	0	0	0	0	0	0	0	0	0	0	0	0	0	0	0	0	0	0	0	0	0
RHBDL2	1	0	0	0	0	0	0	0.172291	0	0	0	0	0	0	0	0	0	0	0	0	0	0	0	0	0	0	0	0	0	0	0	0	0	0	0	0	0	0	0	0	0	0	0	0	0	0	0	0	0
TYSND1	1	0	0	0	0	0	0	0.15998	0	0	0	0	0	0	0	0	0	0	0	0	0	0	0	0	0	0	0	0	0	0	0	0	0	0	0	0	0	0	0	0	0	0	0	0	0	0	0	0	0
RET	1	0	0	0	0	0	0	0.215279	0	0	0	0	0	0	0	0	0	0	0	0	0	0	0	0	0	0	0	0	0	0	0	0	0	0	0	0	0	0	0	0	0	0	0	0	0	0	0	0	0
TESC	1	0	0	0	0	0	0	0.257113	0	0	0	0	0	0	0	0	0	0	0	0	0	0	0	0	0	0	0	0	0	0	0	0	0	0	0	0	0	0	0	0	0	0	0	0	0	0	0	0	0
PAWR	1	0	0	0	0	0	0	0.086516	0	0	0	0	0	0	0	0	0	0	0	0	0	0	0	0	0	0	0	0	0	0	0	0	0	0	0	0	0	0	0	0	0	0	0	0	0	0	0	0	0
GAS6	1	0	0	0	0	0	0	0.115316	0	0	0	0	0	0	0	0	0	0	0	0	0	0	0	0	0	0	0	0	0	0	0	0	0	0	0	0	0	0	0	0	0	0	0	0	0	0	0	0	0
AGA	1	0	0	0	0	0	0	0.087704	0	0	0	0	0	0	0	0	0	0	0	0	0	0	0	0	0	0	0	0	0	0	0	0	0	0	0	0	0	0	0	0	0	0	0	0	0	0	0	0	0
BID	1	0	0	0	0	0	0	0.186728	0	0	0	0	0	0	0	0	0	0	0	0	0	0	0	0	0	0	0	0	0	0	0	0	0	0	0	0	0	0	0	0	0	0	0	0	0	0	0	0	0
EGLN3	1	0	0	0	0	0	0	0.102933	0	0	0	0	0	0	0	0	0	0	0	0	0	0	0	0	0	0	0	0	0	0	0	0	0	0	0	0	0	0	0	0	0	0	0	0	0	0	0	0	0
ASPRV1	1	0	0	0	0	0	0	0.091086	0	0	0	0	0	0	0	0	0	0	0	0	0	0	0	0	0	0	0	0	0	0	0	0	0	0	0	0	0	0	0	0	0	0	0	0	0	0	0	0	0
TNF	1	0	0	0	0	0	0	0.177847	0	0	0	0	0	0	0	0	0	0	0	0	0	0	0	0	0	0	0	0	0	0	0	0	0	0	0	0	0	0	0	0	0	0	0	0	0	0	0	0	0
PMPCA	1	0	0	0	0	0	0	0.127213	0	0	0	0	0	0	0	0	0	0	0	0	0	0	0	0	0	0	0	0	0	0	0	0	0	0	0	0	0	0	0	0	0	0	0	0	0	0	0	0	0
F2R	1	0	0	0	0	0	0	0.096041	0	0	0	0	0	0	0	0	0	0	0	0	0	0	0	0	0	0	0	0	0	0	0	0	0	0	0	0	0	0	0	0	0	0	0	0	0	0	0	0	0
MUL1	1	0	0	0	0	0	0	0.165302	0	0	0	0	0	0	0	0	0	0	0	0	0	0	0	0	0	0	0	0	0	0	0	0	0	0	0	0	0	0	0	0	0	0	0	0	0	0	0	0	0
S100A8	1	0	0	0	0	0	0	0.093412	0	0	0	0	0	0	0	0	0	0	0	0	0	0	0	0	0	0	0	0	0	0	0	0	0	0	0	0	0	0	0	0	0	0	0	0	0	0	0	0	0
BCL2L10	1	0	0	0	0	0	0	0.101711	0	0	0	0	0	0	0	0	0	0	0	0	0	0	0	0	0	0	0	0	0	0	0	0	0	0	0	0	0	0	0	0	0	0	0	0	0	0	0	0	0
PITRM1	1	0	0	0	0	0	0	0.109096	0	0	0	0	0	0	0	0	0	0	0	0	0	0	0	0	0	0	0	0	0	0	0	0	0	0	0	0	0	0	0	0	0	0	0	0	0	0	0	0	0
CPM	1	0	0	0	0	0	0	0.085988	0	0	0	0	0	0	0	0	0	0	0	0	0	0	0	0	0	0	0	0	0	0	0	0	0	0	0	0	0	0	0	0	0	0	0	0	0	0	0	0	0
TRADD	1	0	0	0	0	0	0	0.240359	0	0	0	0	0	0	0	0	0	0	0	0	0	0	0	0	0	0	0	0	0	0	0	0	0	0	0	0	0	0	0	0	0	0	0	0	0	0	0	0	0
CPZ	1	0	0	0	0	0	0	0.087566	0	0	0	0	0	0	0	0	0	0	0	0	0	0	0	0	0	0	0	0	0	0	0	0	0	0	0	0	0	0	0	0	0	0	0	0	0	0	0	0	0
ADAMTS2	1	0	0	0	0	0	0	0.125273	0	0	0	0	0	0	0	0	0	0	0	0	0	0	0	0	0	0	0	0	0	0	0	0	0	0	0	0	0	0	0	0	0	0	0	0	0	0	0	0	0
NKX3-1	1	0	0	0	0	0	0	0.283452	0	0	0	0	0	0	0	0	0	0	0	0	0	0	0	0	0	0	0	0	0	0	0	0	0	0	0	0	0	0	0	0	0	0	0	0	0	0	0	0	0
GZMB	1	0	0	0	0	0	0	0.093149	0	0	0	0	0	0	0	0	0	0	0	0	0	0	0	0	0	0	0	0	0	0	0	0	0	0	0	0	0	0	0	0	0	0	0	0	0	0	0	0	0
SORL1	1	0	0	0	0	0	0	0.141135	0	0	0	0	0	0	0	0	0	0	0	0	0	0	0	0	0	0	0	0	0	0	0	0	0	0	0	0	0	0	0	0	0	0	0	0	0	0	0	0	0
DNAJA3	1	0	0	0	0	0	0	0.216451	0	0	0	0	0	0	0	0	0	0	0	0	0	0	0	0	0	0	0	0	0	0	0	0	0	0	0	0	0	0	0	0	0	0	0	0	0	0	0	0	0
METAP2	1	0	0	0	0	0	0	0.161515	0	0	0	0	0	0	0	0	0	0	0	0	0	0	0	0	0	0	0	0	0	0	0	0	0	0	0	0	0	0	0	0	0	0	0	0	0	0	0	0	0
IFI27	1	0	0	0	0	0	0	0.127296	0	0	0	0	0	0	0	0	0	0	0	0	0	0	0	0	0	0	0	0	0	0	0	0	0	0	0	0	0	0	0	0	0	0	0	0	0	0	0	0	0
KLK6	1	0	0	0	0	0	0	0.193224	0	0	0	0	0	0	0	0	0	0	0	0	0	0	0	0	0	0	0	0	0	0	0	0	0	0	0	0	0	0	0	0	0	0	0	0	0	0	0	0	0
ZMPSTE24	1	0	0	0	0	0	0	0.159093	0	0	0	0	0	0	0	0	0	0	0	0	0	0	0	0	0	0	0	0	0	0	0	0	0	0	0	0	0	0	0	0	0	0	0	0	0	0	0	0	0
APH1A	1	0	0	0	0	0	0	0.167311	0	0	0	0	0	0	0	0	0	0	0	0	0	0	0	0	0	0	0	0	0	0	0	0	0	0	0	0	0	0	0	0	0	0	0	0	0	0	0	0	0
FADD	1	0	0	0	0	0	0	0.129618	0	0	0	0	0	0	0	0	0	0	0	0	0	0	0	0	0	0	0	0	0	0	0	0	0	0	0	0	0	0	0	0	0	0	0	0	0	0	0	0	0
CRADD	1	0	0	0	0	0	0	0.120081	0	0	0	0	0	0	0	0	0	0	0	0	0	0	0	0	0	0	0	0	0	0	0	0	0	0	0	0	0	0	0	0	0	0	0	0	0	0	0	0	0
PCSK9	1	0	0	0	0	0	0	0.098044	0	0	0	0	0	0	0	0	0	0	0	0	0	0	0	0	0	0	0	0	0	0	0	0	0	0	0	0	0	0	0	0	0	0	0	0	0	0	0	0	0
IDE	1	0	0	0	0	0	0	0.121434	0	0	0	0	0	0	0	0	0	0	0	0	0	0	0	0	0	0	0	0	0	0	0	0	0	0	0	0	0	0	0	0	0	0	0	0	0	0	0	0	0
PARP1	1	0	0	0	0	0	0	0.08365	0	0	0	0	0	0	0	0	0	0	0	0	0	0	0	0	0	0	0	0	0	0	0	0	0	0	0	0	0	0	0	0	0	0	0	0	0	0	0	0	0
TMPRSS2	1	0	0	0	0	0	0	0.091228	0	0	0	0	0	0	0	0	0	0	0	0	0	0	0	0	0	0	0	0	0	0	0	0	0	0	0	0	0	0	0	0	0	0	0	0	0	0	0	0	0
SPCS2	1	0	0	0	0	0	0	0.209297	0	0	0	0	0	0	0	0	0	0	0	0	0	0	0	0	0	0	0	0	0	0	0	0	0	0	0	0	0	0	0	0	0	0	0	0	0	0	0	0	0
SPCS1	1	0	0	0	0	0	0	0.145319	0	0	0	0	0	0	0	0	0	0	0	0	0	0	0	0	0	0	0	0	0	0	0	0	0	0	0	0	0	0	0	0	0	0	0	0	0	0	0	0	0
DLC1	1	0	0	0	0	0	0	0.341546	0	0	0	0	0	0	0	0	0	0	0	0	0	0	0	0	0	0	0	0	0	0	0	0	0	0	0	0	0	0	0	0	0	0	0	0	0	0	0	0	0
SPPL2B	1	0	0	0	0	0	0	0.08659	0	0	0	0	0	0	0	0	0	0	0	0	0	0	0	0	0	0	0	0	0	0	0	0	0	0	0	0	0	0	0	0	0	0	0	0	0	0	0	0	0
PLAT	1	0	0	0	0	0	0	0.167682	0	0	0	0	0	0	0	0	0	0	0	0	0	0	0	0	0	0	0	0	0	0	0	0	0	0	0	0	0	0	0	0	0	0	0	0	0	0	0	0	0
CHCHD4	1	0	0	0	0	0	0	0.1867	0	0	0	0	0	0	0	0	0	0	0	0	0	0	0	0	0	0	0	0	0	0	0	0	0	0	0	0	0	0	0	0	0	0	0	0	0	0	0	0	0
FAM162A	1	0	0	0	0	0	0	0.084869	0	0	0	0	0	0	0	0	0	0	0	0	0	0	0	0	0	0	0	0	0	0	0	0	0	0	0	0	0	0	0	0	0	0	0	0	0	0	0	0	0
CAPN2	1	0	0	0	0	0	0	0.10556	0	0	0	0	0	0	0	0	0	0	0	0	0	0	0	0	0	0	0	0	0	0	0	0	0	0	0	0	0	0	0	0	0	0	0	0	0	0	0	0	0
CAPN1	1	0	0	0	0	0	0	0.184582	0	0	0	0	0	0	0	0	0	0	0	0	0	0	0	0	0	0	0	0	0	0	0	0	0	0	0	0	0	0	0	0	0	0	0	0	0	0	0	0	0
DIABLO	1	0	0	0	0	0	0	0.219233	0	0	0	0	0	0	0	0	0	0	0	0	0	0	0	0	0	0	0	0	0	0	0	0	0	0	0	0	0	0	0	0	0	0	0	0	0	0	0	0	0
PMAIP1	1	0	0	0	0	0	0	0.153184	0	0	0	0	0	0	0	0	0	0	0	0	0	0	0	0	0	0	0	0	0	0	0	0	0	0	0	0	0	0	0	0	0	0	0	0	0	0	0	0	0
CPXM2	1	0	0	0	0	0	0	0.368826	0	0	0	0	0	0	0	0	0	0	0	0	0	0	0	0	0	0	0	0	0	0	0	0	0	0	0	0	0	0	0	0	0	0	0	0	0	0	0	0	0
CASP7	1	0	0	0	0	0	0	0.113094	0	0	0	0	0	0	0	0	0	0	0	0	0	0	0	0	0	0	0	0	0	0	0	0	0	0	0	0	0	0	0	0	0	0	0	0	0	0	0	0	0
CASP2	1	0	0	0	0	0	0	0.119567	0	0	0	0	0	0	0	0	0	0	0	0	0	0	0	0	0	0	0	0	0	0	0	0	0	0	0	0	0	0	0	0	0	0	0	0	0	0	0	0	0
IFT57	1	0	0	0	0	0	0	0.142061	0	0	0	0	0	0	0	0	0	0	0	0	0	0	0	0	0	0	0	0	0	0	0	0	0	0	0	0	0	0	0	0	0	0	0	0	0	0	0	0	0
ATG4A	1	0	0	0	0	0	0	0.145742	0	0	0	0	0	0	0	0	0	0	0	0	0	0	0	0	0	0	0	0	0	0	0	0	0	0	0	0	0	0	0	0	0	0	0	0	0	0	0	0	0
ATG4D	1	0	0	0	0	0	0	0.115389	0	0	0	0	0	0	0	0	0	0	0	0	0	0	0	0	0	0	0	0	0	0	0	0	0	0	0	0	0	0	0	0	0	0	0	0	0	0	0	0	0
HSPD1	1	0	0	0	0	0	0	0.096077	0	0	0	0	0	0	0	0	0	0	0	0	0	0	0	0	0	0	0	0	0	0	0	0	0	0	0	0	0	0	0	0	0	0	0	0	0	0	0	0	0
CLN3	1	0	0	0	0	0	0	0.092023	0	0	0	0	0	0	0	0	0	0	0	0	0	0	0	0	0	0	0	0	0	0	0	0	0	0	0	0	0	0	0	0	0	0	0	0	0	0	0	0	0
HSPE1	1	0	0	0	0	0	0	0.217575	0	0	0	0	0	0	0	0	0	0	0	0	0	0	0	0	0	0	0	0	0	0	0	0	0	0	0	0	0	0	0	0	0	0	0	0	0	0	0	0	0
ABCA7	1	0	0	0	0	0	0.106703	0	0	0	0	0	0	0	0	0	0	0	0	0	0	0	0	0	0	0	0	0	0	0	0	0	0	0	0	0	0	0	0	0	0	0	0	0	0	0	0	0	0
JAK3	1	0	0	0	0	0	0.139068	0	0	0	0	0	0	0	0	0	0	0	0	0	0	0	0	0	0	0	0	0	0	0	0	0	0	0	0	0	0	0	0	0	0	0	0	0	0	0	0	0	0
TMEM59	1	0	0	0	0	0	0.100031	0	0	0	0	0	0	0	0	0	0	0	0	0	0	0	0	0	0	0	0	0	0	0	0	0	0	0	0	0	0	0	0	0	0	0	0	0	0	0	0	0	0
TINF2	1	0	0	0	0	0	0.08247	0	0	0	0	0	0	0	0	0	0	0	0	0	0	0	0	0	0	0	0	0	0	0	0	0	0	0	0	0	0	0	0	0	0	0	0	0	0	0	0	0	0
ITM2A	1	0	0	0	0	0	0.15198	0	0	0	0	0	0	0	0	0	0	0	0	0	0	0	0	0	0	0	0	0	0	0	0	0	0	0	0	0	0	0	0	0	0	0	0	0	0	0	0	0	0
ITM2B	1	0	0	0	0	0	0.086528	0	0	0	0	0	0	0	0	0	0	0	0	0	0	0	0	0	0	0	0	0	0	0	0	0	0	0	0	0	0	0	0	0	0	0	0	0	0	0	0	0	0
AATF	1	0	0	0	0	0	0.118579	0	0	0	0	0	0	0	0	0	0	0	0	0	0	0	0	0	0	0	0	0	0	0	0	0	0	0	0	0	0	0	0	0	0	0	0	0	0	0	0	0	0
PTX3	1	0	0	0	0	0	0.131886	0	0	0	0	0	0	0	0	0	0	0	0	0	0	0	0	0	0	0	0	0	0	0	0	0	0	0	0	0	0	0	0	0	0	0	0	0	0	0	0	0	0
ANXA5	2	0	0	0	0	0	0	0	0	0	0	0	0	0	0	0	0.238548	0.238548	0	0	0	0	0	0	0	0	0	0	0	0	0	0	0	0	0	0	0	0	0	0	0	0	0	0	0	0	0	0	0
HPN	2	0	0	0	0	0	0	0	0	0	0	0	0	0	0	0	0.121113	0	0	0	0	0	0	0	0	0	0	0	0	0	0	0	0	0	0	0	0	0	0	0	0	0	0	0	0	0	0	0	0
KLF9	1	0	0	0	0	0	0	0	0	0	0	0	0	0	0	0	0.11031	0	0	0	0	0	0	0	0	0	0	0	0	0	0	0	0	0	0	0	0	0	0	0	0	0	0	0	0	0	0	0	0
LMO2	1	0	0	0	0	0	0	0	0	0	0	0	0	0	0	0	0.206509	0	0	0	0	0	0	0	0	0	0	0	0	0	0	0	0	0	0	0	0	0	0	0	0	0	0	0	0	0	0	0	0
KEAP1	2	0	0	0	0	0	0	0	0	0	0	0	0	0	0	0	0.190153	0	0	0	0	0	0.190153	0	0	0	0	0	0	0	0	0	0	0	0	0	0	0	0	0	0	0	0	0	0	0	0	0	0
AMDHD1	1	0	0	0	0	0	0	0	0	0	0	0	0	0	0	0	0	0	0	0	0	0	0.288523	0	0	0	0	0	0	0	0	0	0	0	0	0	0	0	0	0	0	0	0	0	0	0	0	0	0
MRPS36	1	0	0	0	0	0	0	0	0	0	0	0	0	0	0	0	0	0	0	0	0	0	0.137694	0	0	0	0	0	0	0	0	0	0	0	0	0	0	0	0	0	0	0	0	0	0	0	0	0	0
GCLM	1	0	0	0	0	0	0	0	0	0	0	0	0	0	0	0	0	0	0	0	0	0	0.174831	0	0	0	0	0	0	0	0	0	0	0	0	0	0	0	0	0	0	0	0	0	0	0	0	0	0
FDX1	1	0	0	0	0	0	0	0	0	0	0	0	0.217944	0	0	0	0	0	0	0	0	0	0	0	0	0	0	0	0	0	0	0	0	0	0	0	0	0	0	0	0	0	0	0	0	0	0	0	0
SRD5A1	1	0	0	0	0	0	0	0	0	0	0	0	0.140343	0	0	0	0	0	0	0	0	0	0	0	0	0	0	0	0	0	0	0	0	0	0	0	0	0	0	0	0	0	0	0	0	0	0	0	0
CYP17A1	1	0	0	0	0	0	0	0	0	0	0	0	0.10919	0	0	0	0	0	0	0	0	0	0	0	0	0	0	0	0	0	0	0	0	0	0	0	0	0	0	0	0	0	0	0	0	0	0	0	0
MMACHC	3	0	0	0	0	0	0	0	0	0	0	0	0	0	0	0	0	0	0	0	0	0	0	0	0	0	0	0	0	0.204692	0	0	0	0	0	0	0	0	0	0	0	0	0	0	0	0	0	0	0
TCN2	2	0	0	0	0	0	0	0	0	0	0	0	0	0	0	0	0	0	0	0	0	0	0	0	0	0.083364	0	0	0	0	0	0	0	0	0	0	0	0	0	0	0	0	0	0	0	0	0	0	0
AMN	2	0	0	0	0	0	0	0	0	0	0	0	0	0	0	0	0	0	0	0	0	0	0	0	0	0.080871	0	0	0	0	0	0	0	0	0	0	0	0	0	0	0	0	0	0	0	0	0	0	0
CD320	2	0	0	0	0	0	0	0	0	0	0	0	0	0	0	0	0	0	0	0	0	0	0	0	0	0.175058	0	0	0	0	0	0	0	0	0	0	0	0	0	0	0	0	0	0	0	0	0	0	0
CTRB1	1	0	0	0	0	0	0	0	0	0	0	0	0	0	0	0	0	0	0	0	0	0	0	0	0	0	0	0	0	0	0	0	0	0	0	0	0	0	0	0	0	0	0	0	0	0	0	0	0
CTRC	1	0	0	0	0	0	0	0	0	0	0	0	0	0	0	0	0	0	0	0	0	0	0	0	0	0	0	0	0	0	0	0	0	0	0	0	0	0	0	0	0	0	0	0	0	0	0	0	0
ABCD4	1	0	0	0	0	0	0	0	0	0	0	0	0	0	0	0	0	0	0	0	0	0	0	0	0	0	0	0	0	0	0	0	0	0	0	0	0	0	0	0	0	0	0	0	0	0	0	0	0
ISCA2	3	0	0	0	0	0	0	0.200582	0	0	0	0	0	0	0	0	0	0	0	0	0	0	0	0	0	0	0	0	0	0	0	0	0	0	0	0	0	0	0	0	0	0	0	0.200582	0.200582	0	0	0	0
ISCA1	3	0	0	0	0	0	0	0.101276	0	0	0	0	0	0	0	0	0	0	0	0	0	0	0	0	0	0	0	0	0	0	0	0	0	0	0	0	0	0	0	0	0	0	0	0.101276	0.101276	0	0	0	0
ISCU	4	0	0	0	0	0	0	0.143289	0	0	0	0	0	0	0	0	0	0	0	0	0	0	0	0	0	0	0	0.143289	0	0	0	0	0	0	0	0	0	0	0	0	0	0	0	0.143289	0.143289	0	0	0	0
NUBP1	3	0	0	0	0	0	0	0	0	0	0	0	0	0	0	0	0	0	0	0	0	0	0	0	0	0	0	0.163731	0	0	0	0	0	0	0	0	0	0	0	0	0	0	0	0.163731	0.163731	0	0	0	0
CIAO1	2	0	0	0	0	0	0	0	0	0	0	0	0	0	0	0	0	0	0	0	0	0	0	0	0	0	0	0	0	0	0	0	0	0	0	0	0	0	0	0	0	0	0	0.147912	0.147912	0	0	0	0
MMS19	2	0	0	0	0	0	0	0	0	0	0	0	0	0	0	0	0	0	0	0	0	0	0	0	0	0	0	0	0	0	0	0	0	0	0	0	0	0	0	0	0	0	0	0.068178	0.068178	0	0	0	0
CIAPIN1	2	0	0	0	0	0	0	0	0	0	0	0	0	0	0	0	0	0	0	0	0	0	0	0	0	0	0	0	0	0	0	0	0	0	0	0	0	0	0	0	0	0	0	0.214076	0.214076	0	0	0	0
NUBP2	2	0	0	0	0	0	0	0	0	0	0	0	0	0	0	0	0	0	0	0	0	0	0	0	0	0	0	0	0	0	0	0	0	0	0	0	0	0	0	0	0	0	0	0.064477	0.064477	0	0	0	0
FAM96B	2	0	0	0	0	0	0	0	0	0	0	0	0	0	0	0	0	0	0	0	0	0	0	0	0	0	0	0	0	0	0	0	0	0	0	0	0	0	0	0	0	0	0	0.080265	0.080265	0	0	0	0
FAM96A	2	0	0	0	0	0	0	0	0	0	0	0	0	0	0	0	0	0	0	0	0	0	0	0	0	0	0	0	0	0	0	0	0	0	0	0	0	0	0	0	0	0	0	0.065091	0.065091	0	0	0	0
HMBS	8	0	0	0	0	0	0	0	0	0	0	0	0	0	0	0	0	0.251068	0	0	0	0	0	0	0	0	0	0	0	0	0	0	0	0	0	0	0	0	0	0	0	0	0	0.251068	0.251068	0	0	0	0
NFE2L1	7	0	0	0	0	0	0	0	0	0	0	0	0	0	0	0	0	0	0	0	0	0	0	0	0	0	0	0	0	0	0	0	0	0	0	0	0	0	0	0	0	0	0	0.19017	0.19017	0	0	0	0
ALAS1	7	0	0	0	0	0	0	0	0	0	0	0	0	0	0	0	0	0	0	0	0	0	0	0	0	0	0	0	0	0	0	0	0	0	0	0	0	0	0	0	0	0	0	0.175459	0.175459	0	0	0	0
SLC25A39	7	0	0	0	0	0	0	0	0	0	0	0	0	0	0	0	0	0	0	0	0	0	0	0	0	0	0	0	0	0	0	0	0	0	0	0	0	0	0	0	0	0	0	0.160391	0.160391	0	0	0	0
TMEM14C	7	0	0	0	0	0	0	0	0	0	0	0	0	0	0	0	0	0	0	0	0	0	0	0	0	0	0	0	0	0	0	0	0	0	0	0	0	0	0	0	0	0	0	0.169695	0.169695	0	0	0	0
ABCB6	7	0	0	0	0	0	0	0	0	0	0	0	0	0	0	0	0	0	0	0	0	0	0	0	0.108771	0	0	0.108771	0	0	0	0	0	0	0	0	0	0	0	0	0	0	0	0.108771	0.108771	0	0	0	0
ALAS2	7	0	0	0	0	0	0	0	0	0	0	0	0	0	0	0	0	0	0	0	0	0	0	0	0	0	0	0.110538	0	0	0	0	0	0	0	0	0	0	0	0	0	0	0	0.110538	0.110538	0	0	0	0
BDH2	7	0	0	0	0	0	0	0	0	0	0	0	0	0	0	0	0	0	0	0	0	0	0	0	0	0	0	0.077238	0	0.077238	0	0	0	0	0	0	0	0	0	0	0	0	0	0.077238	0.077238	0	0	0	0
TSPO	5	0	0	0	0	0	0	0	0	0	0	0	0	0	0	0	0	0	0	0	0	0	0	0	0	0	0	0	0	0	0	0	0	0	0	0	0	0	0	0	0	0	0	0.075351	0.075351	0	0	0	0
HMOX1	5	0	0	0	0	0	0	0	0	0	0	0	0	0	0	0	0	0	0	0	0	0	0	0	0	0	0	0.08597	0	0	0	0	0	0	0	0	0	0	0	0	0	0	0	0	0.08597	0	0	0	0
HMOX2	5	0	0	0	0	0	0	0	0	0	0	0	0	0	0	0	0	0	0	0	0	0	0	0	0	0	0	0.163241	0	0	0	0	0	0	0	0	0	0	0	0	0	0	0	0	0.163241	0	0	0	0
BLVRA	4	0	0	0	0	0	0	0	0	0	0	0	0	0	0	0	0	0	0	0	0	0	0	0	0	0	0	0	0	0	0	0	0	0	0	0	0	0	0	0	0	0	0	0	0.126345	0	0	0	0
AKR1C1	4	0	0	0	0	0	0	0	0	0	0	0	0.122021	0	0	0	0	0	0	0.122021	0	0	0	0	0	0	0	0	0	0	0	0	0	0	0	0	0	0	0	0	0	0	0	0	0.122021	0	0	0	0
AKR1C3	6	0	0	0	0	0	0	0	0	0	0	0	0.146764	0	0	0	0	0	0	0.146764	0	0	0	0	0	0	0	0	0.146764	0.146764	0	0	0	0	0	0	0	0	0	0	0	0	0	0	0.146764	0	0	0	0
HLCS	1	0	0	0	0	0	0	0	0	0	0	0	0	0	0	0	0	0	0	0	0	0	0	0	0	0	0	0	0	0	0	0	0	0	0	0	0	0	0	0	0	0	0	0	0.140876	0	0	0	0
CYP1A2	1	0	0	0	0	0	0	0	0	0	0	0	0	0	0	0	0	0	0	0	0	0	0	0	0	0	0	0	0	0	0	0	0	0	0	0	0	0	0	0	0	0	0	0	0.065478	0	0	0	0
PCCA	1	0	0	0	0	0	0	0	0	0	0	0	0	0	0	0	0	0	0	0	0	0	0	0	0	0	0	0	0	0	0	0	0	0	0	0	0	0	0	0	0	0	0	0	0.160936	0	0	0	0
MCCC1	1	0	0	0	0	0	0	0	0	0	0	0	0	0	0	0	0	0	0	0	0	0	0	0	0	0	0	0	0	0	0	0	0	0	0	0	0	0	0	0	0	0	0	0	0.124926	0	0	0	0
VKORC1	1	0	0	0	0	0	0	0	0	0	0	0	0	0	0	0	0	0	0	0	0	0	0	0	0	0	0	0	0	0	0	0	0	0	0	0	0	0	0	0	0	0	0	0	0.125216	0	0	0	0
CBR1	2	0	0	0	0	0	0	0	0	0	0	0	0	0	0	0	0	0	0	0	0	0	0	0	0	0	0	0	0	0.115121	0	0	0	0	0	0	0	0	0	0	0	0	0	0	0.115121	0	0	0	0
CBR4	3	0	0	0	0	0	0	0	0	0	0	0	0	0	0	0	0	0	0	0	0	0	0	0	0	0	0	0	0	0.113531	0	0	0	0	0	0	0	0	0	0	0	0	0	0	0.113531	0	0	0	0
AKR1C4	3	0	0	0	0	0	0	0	0	0	0	0	0	0	0	0	0	0	0	0	0	0	0	0	0	0	0	0	0	0.116873	0	0	0	0	0	0	0	0	0	0	0	0	0	0	0.116873	0	0	0	0
SUCLA2	9	0	0	0	0	0	0	0	0	0	0	0	0	0	0	0	0	0	0	0	0	0	0	0	0	0	0	0	0	0.084147	0	0	0	0	0	0	0	0	0	0	0	0	0	0.084147	0.084147	0.084147	0	0	0
IDH3B	6	0	0	0	0	0	0	0	0	0	0	0	0	0	0	0	0	0	0	0	0	0	0	0	0	0	0	0	0	0	0	0	0	0	0	0	0	0	0	0	0	0	0	0	0.077814	0.077814	0	0	0
SUCLG1	9	0	0	0	0	0	0	0	0	0	0	0	0	0	0	0	0	0	0	0	0	0	0.173524	0	0	0	0	0	0	0	0	0	0	0	0	0	0	0	0	0	0	0	0	0	0.173524	0.173524	0	0	0
IDH3G	11	0	0	0	0	0	0	0	0	0	0	0	0	0	0	0	0	0	0	0	0	0	0.256493	0	0	0	0	0	0	0	0	0	0	0.256493	0	0.256493	0.256493	0	0	0	0	0	0	0	0.256493	0.256493	0	0	0
MDH1	14	0	0	0	0	0	0	0	0	0	0	0	0	0	0	0	0	0	0	0	0	0	0.193836	0	0	0	0	0	0	0.193836	0	0.193836	0.193836	0.193836	0	0.193836	0.193836	0	0	0	0	0	0	0	0.193836	0.193836	0	0	0
GPD1	13	0	0	0	0	0	0	0	0	0	0	0	0	0	0	0	0	0	0	0	0	0	0	0	0	0	0	0	0	0.239568	0	0.239568	0.239568	0.239568	0	0.239568	0.239568	0	0	0	0	0	0	0	0.239568	0.239568	0	0	0
DLD	19	0	0	0	0	0	0	0	0	0	0	0	0	0	0	0	0	0	0.200334	0.200334	0	0	0.200334	0	0	0	0	0	0	0	0	0	0	0.200334	0	0	0	0	0	0	0	0	0.200334	0.200334	0.200334	0.200334	0	0	0
DLST	8	0	0	0	0	0	0	0	0	0	0	0	0	0	0	0	0	0	0.092398	0.092398	0	0	0	0	0	0	0	0	0	0	0	0	0	0	0	0	0	0	0	0	0	0	0	0	0.092398	0.092398	0	0	0
DLAT	8	0	0	0	0	0	0	0	0	0	0	0	0	0	0	0	0	0	0.077617	0.077617	0	0	0	0	0	0	0	0	0	0	0	0	0	0	0	0	0	0	0	0	0	0	0	0.077617	0.077617	0.077617	0	0	0
PDHA1	12	0	0	0	0	0	0	0	0	0	0	0	0	0	0	0	0	0	0.144539	0.144539	0	0	0	0	0	0	0	0	0	0	0	0	0	0.144539	0	0	0	0	0	0	0	0	0.144539	0.144539	0.144539	0.144539	0	0	0
PGD	9	0	0	0	0	0	0	0	0	0	0	0	0	0	0	0	0	0	0	0.172594	0	0	0	0	0	0	0	0	0	0.172594	0	0.172594	0.172594	0.172594	0	0	0	0	0	0	0	0	0	0	0.172594	0.172594	0.172594	0	0
TKT	8	0	0	0	0	0	0	0	0	0	0	0	0	0	0	0	0	0	0	0.138572	0	0	0	0	0	0	0	0	0	0.138572	0	0.138572	0.138572	0.138572	0	0	0	0	0	0	0	0	0	0	0.138572	0.138572	0	0	0
TALDO1	8	0	0	0	0	0	0	0	0	0	0	0	0	0	0	0	0	0	0	0.113658	0	0	0	0	0	0	0	0	0	0.113658	0	0.113658	0.113658	0.113658	0	0	0	0	0	0	0	0	0	0	0.113658	0.113658	0	0	0
LDHB	6	0	0	0	0	0	0	0	0	0	0	0	0	0	0	0	0	0	0	0	0	0	0	0	0	0	0	0	0	0	0	0	0	0.192249	0	0.192249	0	0	0	0	0	0	0.192249	0	0.192249	0.192249	0	0	0
NUDT12	5	0	0	0	0	0	0	0	0	0	0	0	0	0	0	0	0	0	0	0	0	0	0	0	0	0	0	0	0	0	0	0	0	0.151547	0	0.151547	0	0	0	0	0	0	0	0	0.151547	0.151547	0	0	0
KCNAB2	5	0	0	0	0	0	0	0	0	0	0	0	0	0	0	0	0	0	0	0	0	0	0	0	0	0	0	0	0	0	0	0	0	0.128161	0	0	0	0	0	0	0	0	0	0	0.128161	0.128161	0	0	0
CYB5R4	5	0	0	0	0	0	0	0	0	0	0	0	0	0	0	0	0	0	0	0	0	0	0	0	0	0	0	0	0	0	0	0	0	0.131251	0	0	0	0	0	0	0	0	0	0	0.131251	0.131251	0	0	0
DCXR	4	0	0	0	0	0	0	0	0	0	0	0	0	0	0	0	0	0	0	0	0	0	0	0	0	0	0	0	0	0	0	0	0	0.144192	0	0	0	0	0	0	0	0	0	0	0.144192	0.144192	0	0	0
TPI1	8	0	0	0	0	0	0	0	0	0	0	0	0	0	0	0	0	0	0	0.075481	0	0	0	0	0	0	0	0	0	0.075481	0	0	0	0	0	0	0	0	0	0	0	0	0	0	0.075481	0.075481	0	0	0
ATIC	8	0	0	0	0	0	0	0	0	0	0	0	0	0	0	0	0	0	0	0	0	0	0	0	0	0	0	0	0	0.074744	0	0	0	0	0	0	0	0	0	0	0	0	0	0.074744	0.074744	0.074744	0	0	0
GART	7	0	0	0	0	0	0	0	0	0	0	0	0	0	0	0	0	0	0	0	0	0	0	0	0	0	0	0	0	0.096333	0	0	0	0	0	0	0	0	0	0	0	0	0	0.096333	0.096333	0.096333	0	0	0
MTHFD1	6	0	0	0	0	0	0	0	0	0	0	0	0	0	0	0	0	0	0	0	0	0	0	0	0	0	0	0	0	0.102403	0	0	0	0	0	0	0	0	0	0	0	0	0	0.102403	0.102403	0.102403	0	0	0
KMO	5	0	0	0	0	0	0	0	0	0	0	0	0	0	0	0	0	0	0	0	0	0	0	0	0	0	0	0	0	0.090095	0	0	0	0	0	0	0	0	0	0	0	0	0	0.090095	0.090095	0.090095	0	0	0
APIP	6	0	0	0	0	0	0	0	0	0	0	0	0	0	0	0	0	0	0	0	0	0	0	0	0	0	0	0	0	0.097927	0	0	0	0	0	0	0	0	0	0	0	0	0	0	0.097927	0.097927	0	0	0
AHCYL2	5	0	0	0	0	0	0	0	0	0	0	0	0	0	0	0	0	0	0	0	0	0	0	0	0	0	0	0	0	0	0	0	0	0	0	0	0	0	0	0	0	0	0	0	0.15167	0.15167	0	0	0
AHCYL1	5	0	0	0	0	0	0	0	0	0	0	0	0	0	0	0	0	0	0	0	0	0	0	0	0	0	0	0	0	0	0	0	0	0	0	0	0	0	0	0	0	0	0	0	0.073827	0.073827	0	0	0
MLYCD	8	0	0	0	0	0	0	0	0	0	0	0	0	0	0	0	0	0	0	0	0	0	0	0	0	0	0.156484	0	0	0.156484	0	0	0	0	0	0	0	0	0	0	0	0	0	0.156484	0.156484	0.156484	0	0	0
AHCY	7	0	0	0	0	0	0	0	0	0	0	0	0	0	0	0	0	0	0	0	0	0	0	0	0	0	0.07835	0	0	0.07835	0	0	0	0	0	0	0	0	0	0	0	0	0	0	0.07835	0.07835	0	0	0
NUDT7	7	0	0	0	0	0	0	0	0	0	0	0	0	0	0	0	0	0	0	0	0	0	0	0	0	0	0.104194	0	0	0	0	0	0	0	0	0	0	0	0	0	0.104194	0	0	0	0.104194	0.104194	0	0	0
MOCS1	7	0	0	0	0	0	0	0	0	0	0	0	0	0	0	0	0	0	0	0	0	0	0	0	0	0	0	0	0	0	0	0	0	0	0	0	0	0	0	0	0	0	0	0.163373	0.163373	0.163373	0	0	0
NFS1	7	0	0	0	0	0	0	0	0	0	0	0	0	0	0	0	0	0	0	0	0	0	0	0	0	0	0	0	0	0	0	0	0	0	0	0	0	0	0	0	0	0	0	0.168324	0.168324	0.168324	0	0	0
COASY	6	0	0	0	0	0	0	0	0	0	0	0	0	0	0	0	0	0	0	0	0	0	0	0	0	0	0	0	0	0	0	0	0	0	0	0	0	0	0	0	0	0	0	0.103473	0.103473	0.103473	0	0	0
PPCDC	6	0	0	0	0	0	0	0	0	0	0	0	0	0	0	0	0	0	0	0	0	0	0	0	0	0	0	0	0	0	0	0	0	0	0	0	0	0	0	0	0	0	0	0.074871	0.074871	0.074871	0	0	0
MAT2B	6	0	0	0	0	0	0	0	0	0	0	0	0	0	0	0	0	0	0	0	0	0	0	0	0	0	0	0	0	0	0	0	0	0	0	0	0	0	0	0	0	0	0	0.076417	0.076417	0.076417	0	0	0
MAT2A	6	0	0	0	0	0	0	0	0	0	0	0	0	0	0	0	0	0	0	0	0	0	0	0	0	0	0	0	0	0	0	0	0	0	0	0	0	0	0	0	0	0	0	0.079381	0.079381	0.079381	0	0	0
FAR2	2	0	0	0	0	0	0	0	0	0	0	0	0	0	0	0	0	0	0	0	0	0	0	0	0	0	0	0	0	0	0	0	0	0	0	0	0	0	0	0	0	0	0	0	0.070978	0.070978	0	0	0
MCEE	2	0	0	0	0	0	0	0	0	0	0	0	0	0	0	0	0	0	0	0	0	0	0	0	0	0	0	0	0	0	0	0	0	0	0	0	0	0	0	0	0	0	0	0	0.062767	0.062767	0	0	0
DGAT1	2	0	0	0	0	0	0	0	0	0	0	0	0	0	0	0	0	0	0	0	0	0	0	0	0	0	0	0	0	0	0	0	0	0	0	0	0	0	0	0	0	0	0	0	0.075266	0.075266	0	0	0
PRDX5	3	0	0	0	0	0	0	0	0	0	0	0	0	0	0	0	0	0	0	0	0	0	0	0	0	0	0	0	0	0	0	0	0	0	0	0	0	0	0	0	0	0	0	0	0.106906	0.106906	0	0	0
FLAD1	4	0	0	0	0	0	0	0	0	0	0	0	0	0	0	0	0	0	0	0	0	0	0	0	0	0	0	0	0	0	0	0	0	0	0	0	0	0	0	0	0	0	0	0.076916	0.076916	0.076916	0	0	0
DERA	5	0	0	0	0	0	0	0	0	0	0	0	0	0	0	0	0	0	0	0.098584	0	0	0	0	0	0	0	0	0	0	0	0	0	0	0	0	0	0	0	0	0	0	0	0	0.098584	0.098584	0	0	0
H6PD	4	0	0	0	0	0	0	0	0	0	0	0	0	0	0	0	0	0	0	0.075956	0	0	0	0	0	0	0	0	0	0	0	0	0	0	0	0	0	0	0	0	0	0	0	0	0.075956	0.075956	0	0	0
OGDH	5	0	0	0	0	0	0	0	0	0	0	0	0	0	0	0	0	0	0.069099	0.069099	0	0	0	0	0	0	0	0	0	0	0	0	0	0	0	0	0	0	0	0	0	0	0	0	0.069099	0.069099	0	0	0
IDH1	4	0	0	0	0	0	0	0	0	0	0	0	0	0	0	0	0	0	0.061971	0.061971	0	0	0	0	0	0	0	0	0	0	0	0	0	0	0	0	0	0	0	0	0	0	0	0	0.061971	0.061971	0	0	0
PDHX	6	0	0	0	0	0	0	0	0	0	0	0	0	0	0	0	0	0	0.075695	0.075695	0	0	0	0	0	0	0	0	0	0	0	0	0	0	0	0	0	0	0	0	0	0	0	0.075695	0.075695	0.075695	0	0	0
PNPO	5	0	0	0	0	0	0	0	0	0	0	0	0	0	0	0	0	0	0	0.070747	0	0	0	0	0	0	0	0	0	0.070747	0	0	0	0	0	0	0	0	0	0	0	0	0	0.070747	0.070747	0.070747	0	0	0
LIAS	6	0	0	0	0	0	0	0	0	0	0	0	0	0	0	0	0	0	0.107247	0.107247	0	0	0	0	0	0	0	0	0	0.107247	0	0	0	0	0	0	0	0	0	0	0	0	0	0.107247	0.107247	0.107247	0	0	0
PDXK	4	0	0	0	0	0	0	0	0	0	0	0	0	0	0	0	0	0	0	0.059301	0	0	0	0	0	0	0	0	0	0	0	0	0	0	0	0	0	0	0	0	0	0	0	0.059301	0.059301	0.059301	0	0	0
MDH2	5	0	0	0	0	0	0	0	0	0	0	0	0	0	0	0	0	0	0	0	0	0	0	0	0	0	0	0	0	0.072315	0	0	0	0	0	0	0	0	0	0	0	0	0	0	0.072315	0.072315	0	0	0
SHMT2	4	0	0	0	0	0	0	0	0	0	0	0	0	0	0	0	0	0	0	0	0	0	0.172047	0	0	0	0	0	0	0.172047	0	0	0	0	0	0	0	0	0	0	0	0	0	0	0.172047	0.172047	0	0	0
MRI1	3	0	0	0	0	0	0	0	0	0	0	0	0	0	0	0	0	0	0	0	0	0	0	0	0	0	0	0	0	0.061409	0	0	0	0	0	0	0	0	0	0	0	0	0	0	0.061409	0.061409	0	0	0
OXSM	3	0	0	0	0	0	0	0	0	0	0	0	0	0	0	0	0	0	0	0	0	0	0	0	0	0	0	0	0	0.094209	0	0	0	0	0	0	0	0	0	0	0	0	0	0	0.094209	0.094209	0	0	0
PEMT	3	0	0	0	0	0	0	0	0	0	0	0	0	0	0	0	0	0	0	0	0	0	0	0	0	0	0	0	0	0.061399	0	0	0	0	0	0	0	0	0	0	0	0	0	0	0.061399	0.061399	0	0	0
HSD17B4	3	0	0	0	0	0	0	0	0	0	0	0	0	0	0	0	0	0	0	0	0	0	0	0	0	0	0	0	0	0.118454	0	0	0	0	0	0	0	0	0	0	0	0	0	0	0.118454	0.118454	0	0	0
FOLH1	3	0	0	0	0	0	0	0	0	0	0	0	0	0	0	0	0	0	0	0	0	0	0	0	0	0	0	0	0	0.069923	0	0	0	0	0	0	0	0	0	0	0	0	0	0	0.069923	0.069923	0	0	0
MVK	4	0	0	0	0	0	0	0	0	0	0	0	0	0	0	0	0	0	0	0	0	0	0	0	0	0	0	0	0.065347	0.065347	0	0	0	0	0	0	0	0	0	0	0	0	0	0	0.065347	0.065347	0	0	0
PPT1	4	0	0	0	0	0	0	0	0	0	0	0	0	0	0	0	0	0	0	0	0	0	0	0	0.096596	0	0	0	0	0	0	0	0	0	0	0	0	0	0	0	0	0	0	0.096596	0.096596	0.096596	0	0	0
ACOT9	3	0	0	0	0	0	0	0	0	0	0	0	0	0	0	0	0	0	0	0	0	0	0	0	0	0	0	0	0	0	0	0	0	0	0	0	0	0	0	0	0	0	0	0.107178	0.107178	0.107178	0	0	0
AFMID	3	0	0	0	0	0	0	0	0	0	0	0	0	0	0	0	0	0	0	0	0	0	0	0	0	0	0	0	0	0	0	0	0	0	0	0	0	0	0	0	0	0	0	0.059646	0.059646	0.059646	0	0	0
PPT2	3	0	0	0	0	0	0	0	0	0	0	0	0	0	0	0	0	0	0	0	0	0	0	0	0	0	0	0	0	0	0	0	0	0	0	0	0	0	0	0	0	0	0	0.060212	0.060212	0.060212	0	0	0
SPR	3	0	0	0	0	0	0	0	0	0	0	0	0	0	0	0	0	0	0	0	0	0	0	0	0	0	0	0	0	0	0	0	0	0	0	0	0	0	0	0	0	0	0	0.162477	0.162477	0.162477	0	0	0
ACSL1	3	0	0	0	0	0	0	0	0	0	0	0	0	0	0	0	0	0	0	0	0	0	0	0	0	0	0	0	0	0	0	0	0	0	0	0	0	0	0	0	0	0	0	0.06427	0.06427	0.06427	0	0	0
ACSL6	3	0	0	0	0	0	0	0	0	0	0	0	0	0	0	0	0	0	0	0	0	0	0	0	0	0	0	0	0	0	0	0	0	0	0	0	0	0	0	0	0	0	0	0.264946	0.264946	0.264946	0	0	0
ACOT13	3	0	0	0	0	0	0	0	0	0	0	0	0	0	0	0	0	0	0	0	0	0	0	0	0	0	0	0	0	0	0	0	0	0	0	0	0	0	0	0	0	0	0	0.181701	0.181701	0.181701	0	0	0
QDPR	4	0	0	0	0	0	0	0	0	0	0	0	0	0	0	0	0	0.251264	0	0	0	0	0	0	0	0	0	0	0	0	0	0	0	0	0	0	0	0	0	0	0	0	0	0.251264	0.251264	0.251264	0	0	0
MTHFD2	5	0	0	0	0	0	0	0	0	0	0	0	0	0	0	0	0	0	0	0	0	0	0.279072	0	0	0	0	0	0	0.279072	0	0	0	0	0	0	0	0	0	0	0	0	0	0.279072	0.279072	0.279072	0	0	0
DHFR	6	0	0	0	0	0	0	0	0	0	0	0	0	0	0	0	0	0	0	0	0	0	0.158996	0	0	0	0	0	0	0.158996	0	0	0	0	0	0	0	0	0	0	0	0	0	0.158996	0.158996	0.158996	0	0	0
KYNU	8	0	0	0	0	0	0	0	0	0	0	0	0	0	0	0	0	0	0	0	0	0	0.226484	0	0	0	0	0	0	0.226484	0	0	0	0.226484	0	0.226484	0	0	0	0	0	0	0	0.226484	0.226484	0.226484	0	0	0
ELOVL1	5	0	0	0	0	0	0	0	0	0	0	0.143151	0	0	0	0	0	0	0	0	0	0	0	0	0	0	0	0	0	0.143151	0	0	0	0	0	0	0	0	0	0	0	0	0	0.143151	0.143151	0.143151	0	0	0
ELOVL5	4	0	0	0	0	0	0	0	0	0	0	0	0	0	0	0	0	0	0	0	0	0	0	0	0	0	0	0	0	0.060953	0	0	0	0	0	0	0	0	0	0	0	0	0	0.060953	0.060953	0.060953	0	0	0
ELOVL2	4	0	0	0	0	0	0	0	0	0	0	0	0	0	0	0	0	0	0	0	0	0	0	0	0	0	0	0	0	0.072371	0	0	0	0	0	0	0	0	0	0	0	0	0	0.072371	0.072371	0.072371	0	0	0
ELOVL6	4	0	0	0	0	0	0	0	0	0	0	0	0	0	0	0	0	0	0	0	0	0	0	0	0	0	0	0	0	0.073484	0	0	0	0	0	0	0	0	0	0	0	0	0	0.073484	0.073484	0.073484	0	0	0
ELOVL7	4	0	0	0	0	0	0	0	0	0	0	0	0	0	0	0	0	0	0	0	0	0	0	0	0	0	0	0	0	0.216809	0	0	0	0	0	0	0	0	0	0	0	0	0	0.216809	0.216809	0.216809	0	0	0
ACSS2	4	0	0	0	0	0	0	0	0	0	0	0	0	0	0	0	0	0	0	0	0	0	0	0	0	0	0	0	0	0.171461	0	0	0	0	0	0	0	0	0	0	0	0	0	0.171461	0.171461	0.171461	0	0	0
HSD17B12	4	0	0	0	0	0	0	0	0	0	0	0	0	0	0	0	0	0	0	0	0	0	0	0	0	0	0	0	0	0.227894	0	0	0	0	0	0	0	0	0	0	0	0	0	0.227894	0.227894	0.227894	0	0	0
TECR	4	0	0	0	0	0	0	0	0	0	0	0	0	0	0	0	0	0	0	0	0	0	0	0	0	0	0	0	0	0.151766	0	0	0	0	0	0	0	0	0	0	0	0	0	0.151766	0.151766	0.151766	0	0	0
COQ6	4	0	0	0	0	0	0	0	0	0	0	0	0	0	0	0	0	0	0	0	0	0	0	0	0	0	0	0	0	0.098444	0	0	0	0	0	0	0	0	0	0	0	0	0	0.098444	0.098444	0.098444	0	0	0
COQ5	4	0	0	0	0	0	0	0	0	0	0	0	0	0	0	0	0	0	0	0	0	0	0	0	0	0	0	0	0	0.068483	0	0	0	0	0	0	0	0	0	0	0	0	0	0.068483	0.068483	0.068483	0	0	0
COQ3	4	0	0	0	0	0	0	0	0	0	0	0	0	0	0	0	0	0	0	0	0	0	0	0	0	0	0	0	0	0.061238	0	0	0	0	0	0	0	0	0	0	0	0	0	0.061238	0.061238	0.061238	0	0	0
UBIAD1	5	0	0	0	0	0	0	0	0	0	0	0	0	0	0	0	0	0	0	0	0	0	0	0	0	0	0	0	0	0.125505	0	0	0	0.125505	0	0	0	0	0	0	0	0	0	0.125505	0.125505	0.125505	0	0	0
PDSS2	5	0	0	0	0	0	0	0	0	0	0	0	0	0	0	0	0	0	0	0	0	0	0	0	0	0	0	0	0	0.139319	0	0	0	0.139319	0	0	0	0	0	0	0	0	0	0.139319	0.139319	0.139319	0	0	0
GRHPR	3	0	0	0	0	0	0	0	0	0	0	0	0	0	0	0	0	0	0.137525	0.137525	0	0	0.137525	0	0	0	0	0	0	0	0	0	0	0	0	0	0	0	0	0	0	0	0	0	0	0	0	0	0
AGXT	3	0	0	0	0	0	0	0	0	0	0	0	0	0	0	0	0	0	0.09254	0.09254	0	0	0	0	0	0	0	0	0	0.09254	0	0	0	0	0	0	0	0	0	0	0	0	0	0	0	0	0	0	0
GLDC	2	0	0	0	0	0	0	0	0	0	0	0	0	0	0	0	0	0	0.159061	0.159061	0	0	0	0	0	0	0	0	0	0	0	0	0	0	0	0	0	0	0	0	0	0	0	0	0	0	0	0	0
GCSH	2	0	0	0	0	0	0	0	0	0	0	0	0	0	0	0	0	0	0.184352	0.184352	0	0	0	0	0	0	0	0	0	0	0	0	0	0	0	0	0	0	0	0	0	0	0	0	0	0	0	0	0
PDHB	2	0	0	0	0	0	0	0	0	0	0	0	0	0	0	0	0	0	0.057173	0.057173	0	0	0	0	0	0	0	0	0	0	0	0	0	0	0	0	0	0	0	0	0	0	0	0	0	0	0	0	0
BCKDHA	2	0	0	0	0	0	0	0	0	0	0	0	0	0	0	0	0	0	0.057093	0.057093	0	0	0	0	0	0	0	0	0	0	0	0	0	0	0	0	0	0	0	0	0	0	0	0	0	0	0	0	0
ALDH3B1	2	0	0	0	0	0	0	0	0	0	0	0.129672	0	0	0	0	0	0	0	0.129672	0	0	0	0	0	0	0	0	0	0	0	0	0	0	0	0	0	0	0	0	0	0	0	0	0	0	0	0	0
RDH11	1	0	0	0	0	0	0	0	0	0	0	0	0	0	0	0	0	0	0	0.09673	0	0	0	0	0	0	0	0	0	0	0	0	0	0	0	0	0	0	0	0	0	0	0	0	0	0	0	0	0
GLYCTK	1	0	0	0	0	0	0	0	0	0	0	0	0	0	0	0	0	0	0	0.066687	0	0	0	0	0	0	0	0	0	0	0	0	0	0	0	0	0	0	0	0	0	0	0	0	0	0	0	0	0
GLO1	1	0	0	0	0	0	0	0	0	0	0	0	0	0	0	0	0	0	0	0.057262	0	0	0	0	0	0	0	0	0	0	0	0	0	0	0	0	0	0	0	0	0	0	0	0	0	0	0	0	0
BCO2	1	0	0	0	0	0	0	0	0	0	0	0	0	0	0	0	0	0	0	0.192413	0	0	0	0	0	0	0	0	0	0	0	0	0	0	0	0	0	0	0	0	0	0	0	0	0	0	0	0	0
RELA	1	0	0	0	0	0	0	0	0	0	0	0	0	0	0	0	0	0	0	0.108423	0	0	0	0	0	0	0	0	0	0	0	0	0	0	0	0	0	0	0	0	0	0	0	0	0	0	0	0	0
ALDH1A1	1	0	0	0	0	0	0	0	0	0	0	0	0	0	0	0	0	0	0	0.06227	0	0	0	0	0	0	0	0	0	0	0	0	0	0	0	0	0	0	0	0	0	0	0	0	0	0	0	0	0
HAGH	1	0	0	0	0	0	0	0	0	0	0	0	0	0	0	0	0	0	0	0.063177	0	0	0	0	0	0	0	0	0	0	0	0	0	0	0	0	0	0	0	0	0	0	0	0	0	0	0	0	0
PNKD	1	0	0	0	0	0	0	0	0	0	0	0	0	0	0	0	0	0	0	0.257982	0	0	0	0	0	0	0	0	0	0	0	0	0	0	0	0	0	0	0	0	0	0	0	0	0	0	0	0	0
CHST8	1	0	0	0	0	0	0	0	0	0	0	0	0	0	0	0	0	0	0	0	0	0	0	0	0	0	0	0	0	0	0	0	0.157115	0	0	0	0	0	0	0	0	0	0	0	0	0	0	0	0
MPDU1	1	0	0	0	0	0	0	0	0	0	0	0	0	0	0	0	0	0	0	0	0	0	0	0	0	0	0	0	0	0	0	0	0.202921	0	0	0	0	0	0	0	0	0	0	0	0	0	0	0	0
ST6GALNAC1	2	0	0	0	0	0	0	0	0	0	0	0.117686	0	0	0	0	0	0	0	0	0	0	0	0	0	0	0	0	0	0	0	0	0.117686	0	0	0	0	0	0	0	0	0	0	0	0	0	0	0	0
ATF4	3	0	0	0	0	0	0	0	0	0	0	0	0	0	0	0	0	0	0	0	0	0	0	0	0	0	0	0	0	0.205474	0	0.205474	0.205474	0	0	0	0	0	0	0	0	0	0	0	0	0	0	0	0
GSTO1	3	0	0	0	0	0	0	0	0	0	0	0	0	0	0	0	0	0	0	0	0	0	0	0	0	0	0	0	0	0.12874	0	0.12874	0.12874	0	0	0	0	0	0	0	0	0	0	0	0	0	0	0	0
SLC25A11	3	0	0	0	0	0	0	0	0	0	0	0	0	0	0	0	0	0	0	0	0	0	0	0	0	0	0	0	0	0.117436	0	0.117436	0.117436	0	0	0	0	0	0	0	0	0	0	0	0	0	0	0	0
PC	6	0	0	0	0	0	0	0	0	0	0	0	0	0	0	0	0	0	0	0	0	0	0.207835	0	0	0	0	0	0	0.207835	0	0.207835	0.207835	0	0	0	0	0	0	0	0	0	0.207835	0	0.207835	0	0	0	0
GOT1	7	0	0	0	0	0	0	0	0	0	0	0	0	0	0	0	0	0	0	0	0	0	0.202484	0	0	0	0	0	0.202484	0.202484	0.202484	0.202484	0.202484	0	0	0	0	0	0	0	0	0	0	0	0	0	0.202484	0	0
IMPA1	5	0	0	0	0	0	0	0	0	0	0	0	0	0	0	0	0	0	0	0	0	0	0	0	0	0	0	0	0.156512	0.156512	0.156512	0	0.156512	0	0	0	0	0	0	0	0	0	0	0	0	0	0.156512	0	0
PGP	5	0	0	0	0	0	0	0	0	0	0	0	0	0	0	0	0	0	0	0	0	0	0	0	0	0	0	0	0.183416	0.183416	0.183416	0	0.183416	0	0	0	0	0	0	0	0	0	0	0	0	0	0.183416	0	0
IMPAD1	5	0	0	0	0	0	0	0	0	0	0	0	0	0	0	0	0	0	0	0	0	0	0	0	0	0	0	0	0.155541	0.155541	0.155541	0	0.155541	0	0	0	0	0	0	0	0	0	0	0	0	0	0.155541	0	0
AKR1B1	10	0	0	0	0	0	0	0	0	0	0	0	0.202646	0	0	0	0.202646	0	0	0	0	0	0	0	0	0	0	0	0.202646	0.202646	0.202646	0.202646	0.202646	0	0	0	0	0	0	0	0	0	0	0	0.202646	0	0.202646	0	0
FA2H	2	0	0	0	0	0	0	0	0	0	0	0.135089	0	0	0	0	0	0	0	0	0	0	0	0	0	0	0	0	0	0.135089	0	0	0	0	0	0	0	0	0	0	0	0	0	0	0	0	0	0	0
UGT8	1	0	0	0	0	0	0	0	0	0	0	0.127705	0	0	0	0	0	0	0	0	0	0	0	0	0	0	0	0	0	0	0	0	0	0	0	0	0	0	0	0	0	0	0	0	0	0	0	0	0
ST3GAL5	1	0	0	0	0	0	0	0	0	0	0	0.120013	0	0	0	0	0	0	0	0	0	0	0	0	0	0	0	0	0	0	0	0	0	0	0	0	0	0	0	0	0	0	0	0	0	0	0	0	0
ST3GAL6	1	0	0	0	0	0	0	0	0	0	0	0.122678	0	0	0	0	0	0	0	0	0	0	0	0	0	0	0	0	0	0	0	0	0	0	0	0	0	0	0	0	0	0	0	0	0	0	0	0	0
ST3GAL1	1	0	0	0	0	0	0	0	0	0	0	0.169746	0	0	0	0	0	0	0	0	0	0	0	0	0	0	0	0	0	0	0	0	0	0	0	0	0	0	0	0	0	0	0	0	0	0	0	0	0
ST3GAL2	1	0	0	0	0	0	0	0	0	0	0	0.154719	0	0	0	0	0	0	0	0	0	0	0	0	0	0	0	0	0	0	0	0	0	0	0	0	0	0	0	0	0	0	0	0	0	0	0	0	0
GAL3ST1	1	0	0	0	0	0	0	0	0	0	0	0.180772	0	0	0	0	0	0	0	0	0	0	0	0	0	0	0	0	0	0	0	0	0	0	0	0	0	0	0	0	0	0	0	0	0	0	0	0	0
CERS2	1	0	0	0	0	0	0	0	0	0	0	0.125041	0	0	0	0	0	0	0	0	0	0	0	0	0	0	0	0	0	0	0	0	0	0	0	0	0	0	0	0	0	0	0	0	0	0	0	0	0
ST8SIA5	1	0	0	0	0	0	0	0	0	0	0	0.23504	0	0	0	0	0	0	0	0	0	0	0	0	0	0	0	0	0	0	0	0	0	0	0	0	0	0	0	0	0	0	0	0	0	0	0	0	0
ST8SIA1	1	0	0	0	0	0	0	0	0	0	0	0.146934	0	0	0	0	0	0	0	0	0	0	0	0	0	0	0	0	0	0	0	0	0	0	0	0	0	0	0	0	0	0	0	0	0	0	0	0	0
FAM57B	1	0	0	0	0	0	0	0	0	0	0	0.302399	0	0	0	0	0	0	0	0	0	0	0	0	0	0	0	0	0	0	0	0	0	0	0	0	0	0	0	0	0	0	0	0	0	0	0	0	0
SPTSSB	1	0	0	0	0	0	0	0	0	0	0	0.115708	0	0	0	0	0	0	0	0	0	0	0	0	0	0	0	0	0	0	0	0	0	0	0	0	0	0	0	0	0	0	0	0	0	0	0	0	0
OAT	2	0	0	0	0	0	0	0	0	0	0	0	0	0	0	0	0	0	0	0	0	0	0.130022	0	0	0	0	0	0	0.130022	0	0	0	0	0	0	0	0	0	0	0	0	0	0	0	0	0	0	0
GLS2	2	0	0	0	0	0	0	0	0	0	0	0	0	0	0	0	0	0	0	0	0	0	0.139947	0	0	0	0	0	0	0.139947	0	0	0	0	0	0	0	0	0	0	0	0	0	0	0	0	0	0	0
NAGS	2	0	0	0	0	0	0	0	0	0	0	0	0	0	0	0	0	0	0	0	0	0	0.183067	0	0	0	0	0	0	0.183067	0	0	0	0	0	0	0	0	0	0	0	0	0	0	0	0	0	0	0
GLS	1	0	0	0	0	0	0	0	0	0	0	0	0	0	0	0	0	0	0	0	0	0	0	0	0	0	0	0	0	0.096586	0	0	0	0	0	0	0	0	0	0	0	0	0	0	0	0	0	0	0
LIPC	1	0	0	0	0	0	0	0	0	0	0	0	0	0	0	0	0	0	0	0	0	0	0	0	0	0	0	0	0	0.071069	0	0	0	0	0	0	0	0	0	0	0	0	0	0	0	0	0	0	0
PRKAB1	1	0	0	0	0	0	0	0	0	0	0	0	0	0	0	0	0	0	0	0	0	0	0	0	0	0	0	0	0	0.095665	0	0	0	0	0	0	0	0	0	0	0	0	0	0	0	0	0	0	0
RBP1	1	0	0	0	0	0	0	0	0	0	0	0	0	0	0	0	0	0	0	0	0	0	0	0	0	0	0	0	0	0.07436	0	0	0	0	0	0	0	0	0	0	0	0	0	0	0	0	0	0	0
CHST12	1	0	0	0	0	0	0	0	0	0	0	0	0	0	0	0	0	0	0	0	0	0	0	0	0	0	0	0	0	0.074245	0	0	0	0	0	0	0	0	0	0	0	0	0	0	0	0	0	0	0
CHST15	1	0	0	0	0	0	0	0	0	0	0	0	0	0	0	0	0	0	0	0	0	0	0	0	0	0	0	0	0	0.064085	0	0	0	0	0	0	0	0	0	0	0	0	0	0	0	0	0	0	0
AACS	1	0	0	0	0	0	0	0	0	0	0	0	0	0	0	0	0	0	0	0	0	0	0	0	0	0	0	0	0	0.066867	0	0	0	0	0	0	0	0	0	0	0	0	0	0	0	0	0	0	0
GGTLC2	1	0	0	0	0	0	0	0	0	0	0	0	0	0	0	0	0	0	0	0	0	0	0	0	0	0	0	0	0	0.062001	0	0	0	0	0	0	0	0	0	0	0	0	0	0	0	0	0	0	0
ENOPH1	1	0	0	0	0	0	0	0	0	0	0	0	0	0	0	0	0	0	0	0	0	0	0	0	0	0	0	0	0	0.065686	0	0	0	0	0	0	0	0	0	0	0	0	0	0	0	0	0	0	0
ELOVL4	1	0	0	0	0	0	0	0	0	0	0	0	0	0	0	0	0	0	0	0	0	0	0	0	0	0	0	0	0	0.174328	0	0	0	0	0	0	0	0	0	0	0	0	0	0	0	0	0	0	0
RGN	1	0	0	0	0	0	0	0	0	0	0	0	0	0	0	0	0	0	0	0	0	0	0	0	0	0	0	0	0	0.098659	0	0	0	0	0	0	0	0	0	0	0	0	0	0	0	0	0	0	0
MGLL	1	0	0	0	0	0	0	0	0	0	0	0	0	0	0	0	0	0	0	0	0	0	0	0	0	0	0	0	0	0.107727	0	0	0	0	0	0	0	0	0	0	0	0	0	0	0	0	0	0	0
CARNS1	1	0	0	0	0	0	0	0	0	0	0	0	0	0	0	0	0	0	0	0	0	0	0	0	0	0	0	0	0	0.127546	0	0	0	0	0	0	0	0	0	0	0	0	0	0	0	0	0	0	0
PLP1	1	0	0	0	0	0	0	0	0	0	0	0	0	0	0	0	0	0	0	0	0	0	0	0	0	0	0	0	0	0.128455	0	0	0	0	0	0	0	0	0	0	0	0	0	0	0	0	0	0	0
GGT3P	1	0	0	0	0	0	0	0	0	0	0	0	0	0	0	0	0	0	0	0	0	0	0	0	0	0	0	0	0	0.06696	0	0	0	0	0	0	0	0	0	0	0	0	0	0	0	0	0	0	0
PECR	1	0	0	0	0	0	0	0	0	0	0	0	0	0	0	0	0	0	0	0	0	0	0	0	0	0	0	0	0	0.113922	0	0	0	0	0	0	0	0	0	0	0	0	0	0	0	0	0	0	0
PLOD1	1	0	0	0	0	0	0	0	0	0	0	0	0	0	0	0	0	0	0	0	0	0	0	0	0	0	0	0	0	0.079025	0	0	0	0	0	0	0	0	0	0	0	0	0	0	0	0	0	0	0
EIF2B2	1	0	0	0	0	0	0	0	0	0	0	0	0	0	0	0	0	0	0	0	0	0	0	0	0	0	0	0	0	0.13267	0	0	0	0	0	0	0	0	0	0	0	0	0	0	0	0	0	0	0
GOT2	1	0	0	0	0	0	0	0	0	0	0	0	0	0	0	0	0	0	0	0	0	0	0	0	0	0	0	0	0	0.085614	0	0	0	0	0	0	0	0	0	0	0	0	0	0	0	0	0	0	0
QKI	1	0	0	0	0	0	0	0	0	0	0	0	0	0	0	0	0	0	0	0	0	0	0	0	0	0	0	0	0	0.073219	0	0	0	0	0	0	0	0	0	0	0	0	0	0	0	0	0	0	0
G6PC3	1	0	0	0	0	0	0	0	0	0	0	0	0	0	0	0	0	0	0	0	0	0	0	0	0	0	0	0	0	0.075838	0	0	0	0	0	0	0	0	0	0	0	0	0	0	0	0	0	0	0
EIF2B1	1	0	0	0	0	0	0	0	0	0	0	0	0	0	0	0	0	0	0	0	0	0	0	0	0	0	0	0	0	0.097974	0	0	0	0	0	0	0	0	0	0	0	0	0	0	0	0	0	0	0
BCAT1	1	0	0	0	0	0	0	0	0	0	0	0	0	0	0	0	0	0	0	0	0	0	0	0	0	0	0	0	0	0.29714	0	0	0	0	0	0	0	0	0	0	0	0	0	0	0	0	0	0	0
ALOXE3	1	0	0	0	0	0	0	0	0	0	0	0	0	0	0	0	0	0	0	0	0	0	0	0	0	0	0	0	0	0.070176	0	0	0	0	0	0	0	0	0	0	0	0	0	0	0	0	0	0	0
TMLHE	1	0	0	0	0	0	0	0	0	0	0	0	0	0	0	0	0	0	0	0	0	0	0	0	0	0	0	0	0	0.103013	0	0	0	0	0	0	0	0	0	0	0	0	0	0	0	0	0	0	0
CTH	1	0	0	0	0	0	0	0	0	0	0	0	0	0	0	0	0	0	0	0	0	0	0	0	0	0	0	0	0	0.083029	0	0	0	0	0	0	0	0	0	0	0	0	0	0	0	0	0	0	0
PTGDS	1	0	0	0	0	0	0	0	0	0	0	0	0	0	0	0	0	0	0	0	0	0	0	0	0	0	0	0	0	0.102385	0	0	0	0	0	0	0	0	0	0	0	0	0	0	0	0	0	0	0
CYP27A1	1	0	0	0	0	0	0	0	0	0	0	0	0	0	0	0	0	0	0	0	0	0	0	0	0	0	0	0	0	0.162493	0	0	0	0	0	0	0	0	0	0	0	0	0	0	0	0	0	0	0
MGST2	1	0	0	0	0	0	0	0	0	0	0	0	0	0	0	0	0	0	0	0	0	0	0	0	0	0	0	0	0	0.296933	0	0	0	0	0	0	0	0	0	0	0	0	0	0	0	0	0	0	0
NAALAD2	1	0	0	0	0	0	0	0	0	0	0	0	0	0	0	0	0	0	0	0	0	0	0	0	0	0	0	0	0	0.060968	0	0	0	0	0	0	0	0	0	0	0	0	0	0	0	0	0	0	0
MYO5A	1	0	0	0	0	0	0	0	0	0	0	0	0	0	0	0	0	0	0	0	0	0	0	0	0	0	0	0	0	0.148918	0	0	0	0	0	0	0	0	0	0	0	0	0	0	0	0	0	0	0
PYCR2	1	0	0	0	0	0	0	0	0	0	0	0	0	0	0	0	0	0	0	0	0	0	0	0	0	0	0	0	0	0.191872	0	0	0	0	0	0	0	0	0	0	0	0	0	0	0	0	0	0	0
BRCA1	1	0	0	0	0	0	0	0	0	0	0	0	0	0	0	0	0	0	0	0	0	0	0	0	0	0	0	0	0	0.084535	0	0	0	0	0	0	0	0	0	0	0	0	0	0	0	0	0	0	0
ACADM	1	0	0	0	0	0	0	0	0	0	0	0	0	0	0	0	0	0	0	0	0	0	0	0	0	0	0	0	0	0.126785	0	0	0	0	0	0	0	0	0	0	0	0	0	0	0	0	0	0	0
C9orf3	1	0	0	0	0	0	0	0	0	0	0	0	0	0	0	0	0	0	0	0	0	0	0	0	0	0	0	0	0	0.169695	0	0	0	0	0	0	0	0	0	0	0	0	0	0	0	0	0	0	0
FOLH1B	1	0	0	0	0	0	0	0	0	0	0	0	0	0	0	0	0	0	0	0	0	0	0	0	0	0	0	0	0	0.082355	0	0	0	0	0	0	0	0	0	0	0	0	0	0	0	0	0	0	0
GGT5	1	0	0	0	0	0	0	0	0	0	0	0	0	0	0	0	0	0	0	0	0	0	0	0	0	0	0	0	0	0.11604	0	0	0	0	0	0	0	0	0	0	0	0	0	0	0	0	0	0	0
AMACR	1	0	0	0	0	0	0	0	0	0	0	0	0	0	0	0	0	0	0	0	0	0	0	0	0	0	0	0	0	0.066243	0	0	0	0	0	0	0	0	0	0	0	0	0	0	0	0	0	0	0
GGTA1P	1	0	0	0	0	0	0	0	0	0	0	0	0	0	0	0	0	0	0	0	0	0	0	0	0	0	0	0	0	0.070198	0	0	0	0	0	0	0	0	0	0	0	0	0	0	0	0	0	0	0
PARK7	3	0	0	0	0	0	0	0	0	0	0	0	0	0	0	0	0	0	0	0.063353	0	0	0	0	0	0	0	0	0.063353	0.063353	0	0	0	0	0	0	0	0	0	0	0	0	0	0	0	0	0	0	0
CYP11B1	4	0	0	0	0	0	0	0	0	0	0	0	0.145944	0	0	0	0	0	0	0.145944	0	0	0	0	0	0	0	0	0.145944	0.145944	0	0	0	0	0	0	0	0	0	0	0	0	0	0	0	0	0	0	0
ALDH1A3	2	0	0	0	0	0	0	0	0	0	0	0	0	0	0	0	0	0	0	0.151303	0	0	0	0	0	0	0	0	0	0.151303	0	0	0	0	0	0	0	0	0	0	0	0	0	0	0	0	0	0	0
KDM3A	2	0	0	0	0	0	0	0	0	0	0	0	0	0	0	0	0	0	0	0.158047	0	0	0	0	0	0	0	0	0	0.158047	0	0	0	0	0	0	0	0	0	0	0	0	0	0	0	0	0	0	0
STAR	6	0	0	0	0	0	0	0	0	0	0	0	0.231449	0.231449	0	0	0	0.231449	0	0	0	0	0.231449	0	0	0	0	0	0.231449	0.231449	0	0	0	0	0	0	0	0	0	0	0	0	0	0	0	0	0	0	0
ARV1	3	0	0	0	0	0	0	0	0	0	0	0	0	0.107645	0	0	0	0	0	0	0	0	0	0	0	0	0	0	0.107645	0.107645	0	0	0	0	0	0	0	0	0	0	0	0	0	0	0	0	0	0	0
SLC44A1	3	0	0	0	0	0	0	0	0	0	0	0	0	0	0	0	0	0	0	0	0	0	0	0	0	0	0	0	0.093972	0.093972	0	0	0	0	0	0	0	0	0	0	0	0	0	0	0	0	0	0	0
APOA1	3	0	0	0	0	0	0	0	0	0	0	0	0	0	0	0	0	0	0	0	0	0	0	0	0	0.0967	0	0	0.0967	0.0967	0	0	0	0	0	0	0	0	0	0	0	0	0	0	0	0	0	0	0
DHCR24	3	0	0	0	0	0	0	0.20294	0	0	0	0	0	0	0	0	0	0	0	0	0	0	0	0	0	0	0	0	0.20294	0.20294	0	0	0	0	0	0	0	0	0	0	0	0	0	0	0	0	0	0	0
SPHK2	4	0	0	0	0	0	0	0	0	0	0	0.230176	0	0	0	0	0	0	0	0	0	0	0	0	0	0	0	0	0.230176	0.230176	0.230176	0	0	0	0	0	0	0	0	0	0	0	0	0	0	0	0	0	0
SPHK1	4	0	0	0	0	0	0	0	0	0	0	0.202676	0	0	0	0	0	0	0	0	0	0	0	0	0	0	0	0	0.202676	0.202676	0.202676	0	0	0	0	0	0	0	0	0	0	0	0	0	0	0	0	0	0
SAMD8	3	0	0	0	0	0	0	0	0	0	0	0.136784	0	0	0	0	0	0	0	0	0	0	0	0	0	0	0	0	0.136784	0.136784	0	0	0	0	0	0	0	0	0	0	0	0	0	0	0	0	0	0	0
SGMS1	3	0	0	0	0	0	0	0	0	0	0	0.114224	0	0	0	0	0	0	0	0	0	0	0	0	0	0	0	0	0.114224	0.114224	0	0	0	0	0	0	0	0	0	0	0	0	0	0	0	0	0	0	0
IP6K3	3	0	0	0	0	0	0	0	0	0	0	0	0	0	0	0	0	0	0	0	0	0	0	0	0	0	0	0	0.165563	0.165563	0.165563	0	0	0	0	0	0	0	0	0	0	0	0	0	0	0	0	0	0
CH25H	2	0	0	0	0	0	0	0	0	0	0	0	0	0	0	0	0	0	0	0	0	0	0	0	0	0	0	0	0.12886	0.12886	0	0	0	0	0	0	0	0	0	0	0	0	0	0	0	0	0	0	0
CYB5R2	2	0	0	0	0	0	0	0	0	0	0	0	0	0	0	0	0	0	0	0	0	0	0	0	0	0	0	0	0.073035	0.073035	0	0	0	0	0	0	0	0	0	0	0	0	0	0	0	0	0	0	0
CHKA	2	0	0	0	0	0	0	0	0	0	0	0	0	0	0	0	0	0	0	0	0	0	0	0	0	0	0	0	0.065027	0.065027	0	0	0	0	0	0	0	0	0	0	0	0	0	0	0	0	0	0	0
SQLE	2	0	0	0	0	0	0	0	0	0	0	0	0	0	0	0	0	0	0	0	0	0	0	0	0	0	0	0	0.079081	0.079081	0	0	0	0	0	0	0	0	0	0	0	0	0	0	0	0	0	0	0
ACHE	2	0	0	0	0	0	0	0	0	0	0	0	0	0	0	0	0	0	0	0	0	0	0	0	0	0	0	0	0.206651	0.206651	0	0	0	0	0	0	0	0	0	0	0	0	0	0	0	0	0	0	0
FABP5	2	0	0	0	0	0	0	0	0	0	0	0	0	0	0	0	0	0	0	0	0	0	0	0	0	0	0	0	0.063392	0.063392	0	0	0	0	0	0	0	0	0	0	0	0	0	0	0	0	0	0	0
SLC27A1	2	0	0	0	0	0	0	0	0	0	0	0	0	0	0	0	0	0	0	0	0	0	0	0	0	0	0	0	0.085916	0.085916	0	0	0	0	0	0	0	0	0	0	0	0	0	0	0	0	0	0	0
FGF7	2	0	0	0	0	0	0	0	0	0	0	0	0	0	0	0	0	0	0	0	0	0	0	0	0	0	0	0	0.104637	0.104637	0	0	0	0	0	0	0	0	0	0	0	0	0	0	0	0	0	0	0
INSIG2	2	0	0	0	0	0	0	0	0	0	0	0	0	0	0	0	0	0	0	0	0	0	0	0	0	0	0	0	0.162098	0.162098	0	0	0	0	0	0	0	0	0	0	0	0	0	0	0	0	0	0	0
ABHD3	2	0	0	0	0	0	0	0	0	0	0	0	0	0	0	0	0	0	0	0	0	0	0	0	0	0	0	0	0.085535	0.085535	0	0	0	0	0	0	0	0	0	0	0	0	0	0	0	0	0	0	0
INSIG1	2	0	0	0	0	0	0	0	0	0	0	0	0	0	0	0	0	0	0	0	0	0	0	0	0	0	0	0	0.06866	0.06866	0	0	0	0	0	0	0	0	0	0	0	0	0	0	0	0	0	0	0
DHCR7	2	0	0	0	0	0	0	0	0	0	0	0	0	0	0	0	0	0	0	0	0	0	0	0	0	0	0	0	0.088902	0.088902	0	0	0	0	0	0	0	0	0	0	0	0	0	0	0	0	0	0	0
HMGCS2	2	0	0	0	0	0	0	0	0	0	0	0	0	0	0	0	0	0	0	0	0	0	0	0	0	0	0	0	0.136082	0.136082	0	0	0	0	0	0	0	0	0	0	0	0	0	0	0	0	0	0	0
LBR	2	0	0	0	0	0	0	0	0	0	0	0	0	0	0	0	0	0	0	0	0	0	0	0	0	0	0	0	0.064093	0.064093	0	0	0	0	0	0	0	0	0	0	0	0	0	0	0	0	0	0	0
GGPS1	2	0	0	0	0	0	0	0	0	0	0	0	0	0	0	0	0	0	0	0	0	0	0	0	0	0	0	0	0.087479	0.087479	0	0	0	0	0	0	0	0	0	0	0	0	0	0	0	0	0	0	0
CYP51A1	2	0	0	0	0	0	0	0	0	0	0	0	0	0	0	0	0	0	0	0	0	0	0	0	0	0	0	0	0.140492	0.140492	0	0	0	0	0	0	0	0	0	0	0	0	0	0	0	0	0	0	0
CDS1	2	0	0	0	0	0	0	0	0	0	0	0	0	0	0	0	0	0	0	0	0	0	0	0	0	0	0	0	0.308243	0.308243	0	0	0	0	0	0	0	0	0	0	0	0	0	0	0	0	0	0	0
ACER3	2	0	0	0	0	0	0	0	0	0	0	0	0	0	0	0	0	0	0	0	0	0	0	0	0	0	0	0	0.090048	0.090048	0	0	0	0	0	0	0	0	0	0	0	0	0	0	0	0	0	0	0
PCYT1B	2	0	0	0	0	0	0	0	0	0	0	0	0	0	0	0	0	0	0	0	0	0	0	0	0	0	0	0	0.081539	0.081539	0	0	0	0	0	0	0	0	0	0	0	0	0	0	0	0	0	0	0
DPAGT1	2	0	0	0	0	0	0	0	0	0	0	0	0	0	0	0	0	0	0	0	0	0	0	0	0	0	0	0	0.103344	0.103344	0	0	0	0	0	0	0	0	0	0	0	0	0	0	0	0	0	0	0
ACAA2	2	0	0	0	0	0	0	0	0	0	0	0	0	0	0	0	0	0	0	0	0	0	0	0	0	0	0	0	0.114211	0.114211	0	0	0	0	0	0	0	0	0	0	0	0	0	0	0	0	0	0	0
PHOSPHO1	2	0	0	0	0	0	0	0	0	0	0	0	0	0	0	0	0	0	0	0	0	0	0	0	0	0	0	0	0.183337	0.183337	0	0	0	0	0	0	0	0	0	0	0	0	0	0	0	0	0	0	0
IDI1	2	0	0	0	0	0	0	0	0	0	0	0	0	0	0	0	0	0	0	0	0	0	0	0	0	0	0	0	0.131245	0.131245	0	0	0	0	0	0	0	0	0	0	0	0	0	0	0	0	0	0	0
CHAT	2	0	0	0	0	0	0	0	0	0	0	0	0	0	0	0	0	0	0	0	0	0	0	0	0	0	0	0	0.070221	0.070221	0	0	0	0	0	0	0	0	0	0	0	0	0	0	0	0	0	0	0
NPC1L1	2	0	0	0	0	0	0	0	0	0	0	0	0	0	0	0	0	0	0	0	0	0	0	0	0	0	0	0	0.077027	0.077027	0	0	0	0	0	0	0	0	0	0	0	0	0	0	0	0	0	0	0
LSS	2	0	0	0	0	0	0	0	0	0	0	0	0	0	0	0	0	0	0	0	0	0	0	0	0	0	0	0	0.089973	0.089973	0	0	0	0	0	0	0	0	0	0	0	0	0	0	0	0	0	0	0
LPIN3	2	0	0	0	0	0	0	0	0	0	0	0	0	0	0	0	0	0	0	0	0	0	0	0	0	0	0	0	0.07709	0.07709	0	0	0	0	0	0	0	0	0	0	0	0	0	0	0	0	0	0	0
SLC31A1	1	0	0	0	0	0	0	0	0	0	0	0	0	0	0	0	0	0	0	0	0	0	0	0.161037	0	0	0	0	0	0	0	0	0	0	0	0	0	0	0	0	0	0	0	0	0	0	0	0	0
TMEM30A	1	0	0	0	0	0	0	0	0	0	0	0	0	0	0	0	0	0	0	0	0	0	0	0.12976	0	0	0	0	0	0	0	0	0	0	0	0	0	0	0	0	0	0	0	0	0	0	0	0	0
SLC19A2	2	0	0	0	0	0	0	0	0	0	0	0	0	0	0	0	0	0	0	0	0	0	0	0	0.170566	0.170566	0	0	0	0	0	0	0	0	0	0	0	0	0	0	0	0	0	0	0	0	0	0	0
SLC19A3	1	0	0	0	0	0	0	0	0	0	0	0	0	0	0	0	0	0	0	0	0	0	0	0	0	0.126217	0	0	0	0	0	0	0	0	0	0	0	0	0	0	0	0	0	0	0	0	0	0	0
STRA6	1	0	0	0	0	0	0	0	0	0	0	0	0	0	0	0	0	0	0	0	0	0	0	0	0	0.095994	0	0	0	0	0	0	0	0	0	0	0	0	0	0	0	0	0	0	0	0	0	0	0
SLC5A6	7	0	0	0	0	0	0	0	0	0	0	0	0	0	0.18565	0	0	0	0	0	0	0	0	0	0.18565	0.18565	0	0	0	0	0	0	0	0	0	0	0	0	0	0	0	0	0	0	0.18565	0.18565	0	0	0
SLC25A32	5	0	0	0	0	0	0	0	0	0	0	0	0	0	0	0	0	0	0	0	0	0	0.215553	0	0.215553	0.215553	0	0	0	0	0	0	0	0	0	0	0	0	0	0	0	0	0	0	0.215553	0.215553	0	0	0
SLC46A1	10	0	0	0	0	0	0	0	0	0	0	0	0	0	0	0	0	0	0	0	0	0	0.159262	0.159262	0.159262	0.159262	0	0.159262	0	0	0	0	0	0	0	0	0	0	0	0	0	0	0	0	0.159262	0.159262	0	0	0
ABCB7	2	0	0	0	0	0	0	0	0	0	0	0	0	0	0	0	0	0	0	0	0	0	0	0	0.09176	0	0	0.09176	0	0	0	0	0	0	0	0	0	0	0	0	0	0	0	0	0	0	0	0	0
SLC48A1	1	0	0	0	0	0	0	0	0	0	0	0	0	0	0	0	0	0	0	0	0	0	0	0	0.117446	0	0	0	0	0	0	0	0	0	0	0	0	0	0	0	0	0	0	0	0	0	0	0	0
SLC25A17	1	0	0	0	0	0	0	0	0	0	0	0	0	0	0	0	0	0	0	0	0	0	0	0	0.148717	0	0	0	0	0	0	0	0	0	0	0	0	0	0	0	0	0	0	0	0	0	0	0	0
ABCG2	4	0	0	0	0	0	0	0	0	0	0	0	0	0	0	0	0	0	0	0	0	0	0	0.172281	0.172281	0	0	0.172281	0	0	0	0	0	0	0	0	0	0	0	0	0	0	0	0	0	0	0	0	0
TFRC	1	0	0	0	0	0	0	0	0	0	0	0	0	0	0	0	0	0	0	0	0	0	0	0	0	0	0	0.11641	0	0	0	0	0	0	0	0	0	0	0	0	0	0	0	0	0	0	0	0	0
SFXN4	1	0	0	0	0	0	0	0	0	0	0	0	0	0	0	0	0	0	0	0	0	0	0	0	0	0	0	0.248696	0	0	0	0	0	0	0	0	0	0	0	0	0	0	0	0	0	0	0	0	0
SFXN1	1	0	0	0	0	0	0	0	0	0	0	0	0	0	0	0	0	0	0	0	0	0	0	0	0	0	0	0.159386	0	0	0	0	0	0	0	0	0	0	0	0	0	0	0	0	0	0	0	0	0
NEO1	1	0	0	0	0	0	0	0	0	0	0	0	0	0	0	0	0	0	0	0	0	0	0	0	0	0	0	0.135098	0	0	0	0	0	0	0	0	0	0	0	0	0	0	0	0	0	0	0	0	0
SLC25A37	1	0	0	0	0	0	0	0	0	0	0	0	0	0	0	0	0	0	0	0	0	0	0	0	0	0	0	0.166382	0	0	0	0	0	0	0	0	0	0	0	0	0	0	0	0	0	0	0	0	0
B2M	1	0	0	0	0	0	0	0	0	0	0	0	0	0	0	0	0	0	0	0	0	0	0	0	0	0	0	0.109849	0	0	0	0	0	0	0	0	0	0	0	0	0	0	0	0	0	0	0	0	0
TF	1	0	0	0	0	0	0	0	0	0	0	0	0	0	0	0	0	0	0	0	0	0	0	0	0	0	0	0.184723	0	0	0	0	0	0	0	0	0	0	0	0	0	0	0	0	0	0	0	0	0
SCARA5	1	0	0	0	0	0	0	0	0	0	0	0	0	0	0	0	0	0	0	0	0	0	0	0	0	0	0	0.096317	0	0	0	0	0	0	0	0	0	0	0	0	0	0	0	0	0	0	0	0	0
STEAP2	1	0	0	0	0	0	0	0	0	0	0	0	0	0	0	0	0	0	0	0	0	0	0	0	0	0	0	0.117763	0	0	0	0	0	0	0	0	0	0	0	0	0	0	0	0	0	0	0	0	0
FTHL17	1	0	0	0	0	0	0	0	0	0	0	0	0	0	0	0	0	0	0	0	0	0	0	0	0	0	0	0.073352	0	0	0	0	0	0	0	0	0	0	0	0	0	0	0	0	0	0	0	0	0
SOD1	1	0	0	0	0	0	0	0	0	0	0	0	0	0	0	0	0	0	0	0	0	0	0	0	0	0	0	0.076943	0	0	0	0	0	0	0	0	0	0	0	0	0	0	0	0	0	0	0	0	0
SGK2	2	0	0	0	0	0	0	0	0	0	0	0	0	0	0	0	0	0	0	0	0	0	0	0	0	0	0	0	0	0	0	0	0	0	0	0	0	0	0	0	0	0	0	0	0	0	0	0	0
SLC8A1	4	0	0	0	0	0	0	0	0	0	0	0	0	0	0	0	0	0	0	0	0	0	0	0	0	0	0	0	0	0	0	0	0	0	0	0	0	0	0	0	0	0	0	0	0	0	0	0	0
ATP1B3	6	0	0	0	0	0	0	0	0	0	0	0	0	0	0	0	0	0	0	0	0	0	0	0	0	0	0	0	0	0	0	0	0	0	0	0	0	0	0	0	0	0	0	0	0	0	0	0	0
SLC9A1	6	0	0	0	0	0	0	0	0	0	0	0	0	0	0	0	0	0	0	0	0	0	0	0	0	0	0	0	0	0	0	0	0	0	0	0	0	0	0	0	0	0	0	0	0	0	0	0	0
ATP1A4	8	0	0	0	0	0	0	0	0	0	0	0	0	0	0	0	0	0	0	0	0	0	0	0	0	0	0	0	0	0	0	0	0	0	0	0	0	0	0	0	0	0	0	0	0	0	0	0	0
ATP1A3	8	0	0	0	0	0	0	0	0	0	0	0	0	0	0	0	0	0	0	0	0	0	0	0	0	0	0	0	0	0	0	0	0	0	0	0	0	0	0	0	0	0	0	0	0	0	0	0	0
ATP1A1	8	0	0	0	0	0	0	0	0	0	0	0	0	0	0	0	0	0	0	0	0	0	0	0	0	0	0	0	0	0	0	0	0	0	0	0	0	0	0	0	0	0	0	0	0	0	0	0	0
SLC36A1	5	0	0	0	0	0	0	0	0	0	0	0	0	0	0.095694	0.095694	0	0	0	0	0	0	0	0	0	0	0	0	0	0	0	0	0	0	0	0	0	0	0	0	0	0	0	0	0	0	0	0	0
SLC35A4	2	0	0	0	0	0	0	0	0	0	0	0	0	0	0	0	0	0	0	0	0	0	0	0	0	0	0	0	0	0	0	0	0	0	0	0	0	0	0	0	0	0	0	0	0	0	0	0	0
SLC47A1	4	0	0	0	0	0	0	0	0	0	0	0	0	0	0	0	0	0	0	0	0	0	0	0.395443	0	0	0	0	0	0	0	0	0	0	0	0	0	0	0	0	0	0	0	0	0	0	0	0	0
SLC9A5	4	0	0	0	0	0	0	0	0	0	0	0	0	0	0	0	0	0	0	0	0	0	0	0	0	0	0	0	0	0	0	0	0	0	0	0	0	0	0	0	0	0	0	0	0	0	0	0	0
SLC9A9	4	0	0	0	0	0	0	0	0	0	0	0	0	0	0	0	0	0	0	0	0	0	0	0	0	0	0	0	0	0	0	0	0	0	0	0	0	0	0	0	0	0	0	0	0	0	0	0	0
TMCO3	3	0	0	0	0	0	0	0	0	0	0	0	0	0	0	0	0	0	0	0	0	0	0	0	0	0	0	0	0	0	0	0	0	0	0	0	0	0	0	0	0	0	0	0	0	0	0	0	0
COX7A2	3	0	0	0	0	0	0	0	0	0	0	0	0	0	0	0	0	0	0	0	0	0	0	0	0	0	0	0	0	0	0	0	0	0	0	0	0	0	0	0	0	0	0	0	0	0	0	0	0
COX11	3	0	0	0	0	0	0	0	0	0	0	0	0	0	0	0	0	0	0	0	0	0	0	0	0	0	0	0	0	0	0	0	0	0	0	0	0	0	0	0	0	0	0	0	0	0	0	0	0
ATP6V1E2	4	0	0	0	0	0	0	0	0	0	0	0	0	0	0	0	0	0	0	0	0	0	0	0	0	0	0	0	0	0	0	0	0	0	0	0	0	0	0	0	0	0	0	0	0	0	0	0	0
ATP6V0E1	4	0	0	0	0	0	0	0	0	0	0	0	0	0	0	0	0	0	0	0	0	0	0	0	0	0	0	0	0	0	0	0	0	0	0	0	0	0	0	0	0	0	0	0	0	0	0	0	0
ATP6V0D1	4	0	0	0	0	0	0	0	0	0	0	0	0	0	0	0	0	0	0	0	0	0	0	0	0	0	0	0	0	0	0	0	0	0	0	0	0	0	0	0	0	0	0	0	0	0	0	0	0
ATP6V0B	4	0	0	0	0	0	0	0	0	0	0	0	0	0	0	0	0	0	0	0	0	0	0	0	0	0	0	0	0	0	0	0	0	0	0	0	0	0	0	0	0	0	0	0	0	0	0	0	0
ATP6V0E2	4	0	0	0	0	0	0	0	0	0	0	0	0	0	0	0	0	0	0	0	0	0	0	0	0	0	0	0	0	0	0	0	0	0	0	0	0	0	0	0	0	0	0	0	0	0	0	0	0
ATP6V1F	4	0	0	0	0	0	0	0	0	0	0	0	0	0	0	0	0	0	0	0	0	0	0	0	0	0	0	0	0	0	0	0	0	0	0	0	0	0	0	0	0	0	0	0	0	0	0	0	0
COX8C	2	0	0	0	0	0	0	0	0	0	0	0	0	0	0	0	0	0	0	0	0	0	0	0	0	0	0	0	0	0	0	0	0	0	0	0	0	0	0	0	0	0	0	0	0	0	0	0	0
COX6B1	2	0	0	0	0	0	0	0	0	0	0	0	0	0	0	0	0	0	0	0	0	0	0	0	0	0	0	0	0	0	0	0	0	0	0	0	0	0	0	0	0	0	0	0	0	0	0	0	0
HVCN1	1	0	0	0	0	0	0	0	0	0	0	0	0	0	0	0	0	0	0	0	0	0	0	0	0	0	0	0	0	0	0	0	0	0	0	0	0	0	0	0	0	0	0	0	0	0	0	0	0
ATP6V1G2	1	0	0	0	0	0	0	0	0	0	0	0	0	0	0	0	0	0	0	0	0	0	0	0	0	0	0	0	0	0	0	0	0	0	0	0	0	0	0	0	0	0	0	0	0	0	0	0	0
COX6B2	1	0	0	0	0	0	0	0	0	0	0	0	0	0	0	0	0	0	0	0	0	0	0	0	0	0	0	0	0	0	0	0	0	0	0	0	0	0	0	0	0	0	0	0	0	0	0	0	0
COX7A1	1	0	0	0	0	0	0	0	0	0	0	0	0	0	0	0	0	0	0	0	0	0	0	0	0	0	0	0	0	0	0	0	0	0	0	0	0	0	0	0	0	0	0	0	0	0	0	0	0
SLC2A6	1	0	0	0	0	0	0	0	0	0	0	0	0	0	0	0	0	0	0	0	0	0	0	0	0	0	0	0	0	0	0	0	0	0	0	0	0	0	0	0	0	0	0	0	0	0	0	0	0
MFSD3	1	0	0	0	0	0	0	0	0	0	0	0	0	0	0	0	0	0	0	0	0	0	0	0	0	0	0	0	0	0	0	0	0	0	0	0	0	0	0	0	0	0	0	0	0	0	0	0	0
STOML2	1	0	0	0	0	0	0	0	0	0	0	0	0	0	0	0	0	0	0	0	0	0	0	0	0	0	0	0	0	0	0	0	0	0	0	0	0	0	0	0	0	0	0	0	0	0	0	0	0
EMB	1	0	0	0	0	0	0	0	0	0	0	0	0	0	0.241782	0	0	0	0	0	0	0	0	0	0	0	0	0	0	0	0	0	0	0	0	0	0	0	0	0	0	0	0	0	0	0	0	0	0
SLC16A6	1	0	0	0	0	0	0	0	0	0	0	0	0	0	0.302701	0	0	0	0	0	0	0	0	0	0	0	0	0	0	0	0	0	0	0	0	0	0	0	0	0	0	0	0	0	0	0	0	0	0
SLC16A7	1	0	0	0	0	0	0	0	0	0	0	0	0	0	0.095086	0	0	0	0	0	0	0	0	0	0	0	0	0	0	0	0	0	0	0	0	0	0	0	0	0	0	0	0	0	0	0	0	0	0
SLC16A1	2	0	0	0	0	0	0	0	0	0	0	0	0	0	0.186645	0	0	0	0	0	0	0	0	0	0	0	0	0	0	0	0	0	0	0	0	0	0	0	0	0	0	0	0.186645	0	0	0	0	0	0
SLC16A3	2	0	0	0	0	0	0	0	0	0	0	0	0	0	0.210216	0	0	0	0	0	0	0	0	0	0	0	0	0	0	0	0	0	0	0	0	0	0	0	0	0	0	0	0.210216	0	0	0	0	0	0
SLC7A5	2	0	0	0	0	0	0	0	0	0	0	0	0	0	0.151296	0.151296	0	0	0	0	0	0	0	0	0	0	0	0	0	0	0	0	0	0	0	0	0	0	0	0	0	0	0	0	0	0	0	0	0
SLC7A6	2	0	0	0	0	0	0	0	0	0	0	0	0	0	0.156866	0.156866	0	0	0	0	0	0	0	0	0	0	0	0	0	0	0	0	0	0	0	0	0	0	0	0	0	0	0	0	0	0	0	0	0
SLC7A8	2	0	0	0	0	0	0	0	0	0	0	0	0	0	0.230943	0.230943	0	0	0	0	0	0	0	0	0	0	0	0	0	0	0	0	0	0	0	0	0	0	0	0	0	0	0	0	0	0	0	0	0
SLC7A1	2	0	0	0	0	0	0	0	0	0	0	0	0	0	0.223145	0.223145	0	0	0	0	0	0	0	0	0	0	0	0	0	0	0	0	0	0	0	0	0	0	0	0	0	0	0	0	0	0	0	0	0
SLC7A5P2	2	0	0	0	0	0	0	0	0	0	0	0	0	0	0.117874	0.117874	0	0	0	0	0	0	0	0	0	0	0	0	0	0	0	0	0	0	0	0	0	0	0	0	0	0	0	0	0	0	0	0	0
SLC38A5	2	0	0	0	0	0	0	0	0	0	0	0	0	0	0.107602	0.107602	0	0	0	0	0	0	0	0	0	0	0	0	0	0	0	0	0	0	0	0	0	0	0	0	0	0	0	0	0	0	0	0	0
SLC25A15	2	0	0	0	0	0	0	0	0	0	0	0	0	0	0.227478	0.227478	0	0	0	0	0	0	0	0	0	0	0	0	0	0	0	0	0	0	0	0	0	0	0	0	0	0	0	0	0	0	0	0	0
SLC6A19	2	0	0	0	0	0	0	0	0	0	0	0	0	0	0.146364	0.146364	0	0	0	0	0	0	0	0	0	0	0	0	0	0	0	0	0	0	0	0	0	0	0	0	0	0	0	0	0	0	0	0	0
SLC7A14	2	0	0	0	0	0	0	0	0	0	0	0	0	0	0.149415	0.149415	0	0	0	0	0	0	0	0	0	0	0	0	0	0	0	0	0	0	0	0	0	0	0	0	0	0	0	0	0	0	0	0	0
SLC7A10	2	0	0	0	0	0	0	0	0	0	0	0	0	0	0.095734	0.095734	0	0	0	0	0	0	0	0	0	0	0	0	0	0	0	0	0	0	0	0	0	0	0	0	0	0	0	0	0	0	0	0	0
SLC32A1	2	0	0	0	0	0	0	0	0	0	0	0	0	0	0.118271	0.118271	0	0	0	0	0	0	0	0	0	0	0	0	0	0	0	0	0	0	0	0	0	0	0	0	0	0	0	0	0	0	0	0	0
SLC1A5	2	0	0	0	0	0	0	0	0	0	0	0	0	0	0.160268	0.160268	0	0	0	0	0	0	0	0	0	0	0	0	0	0	0	0	0	0	0	0	0	0	0	0	0	0	0	0	0	0	0	0	0
SLC1A7	2	0	0	0	0	0	0	0	0	0	0	0	0	0	0.146569	0.146569	0	0	0	0	0	0	0	0	0	0	0	0	0	0	0	0	0	0	0	0	0	0	0	0	0	0	0	0	0	0	0	0	0
PRKAB2	4	0	0	0	0	0	0	0	0	0	0	0	0	0.112767	0.112767	0	0	0	0	0	0	0	0	0	0	0	0	0	0	0.112767	0	0	0	0	0	0	0	0	0	0	0	0	0	0	0	0	0	0	0
CPT1A	3	0	0	0	0	0	0	0	0	0	0	0	0	0.247194	0.247194	0	0	0	0	0	0	0	0	0	0	0	0	0	0	0	0	0	0	0	0	0	0	0	0	0	0	0	0	0	0	0	0	0	0
LDLRAP1	1	0	0	0	0	0	0	0	0	0	0	0	0	0.1787	0	0	0	0	0	0	0	0	0	0	0	0	0	0	0	0	0	0	0	0	0	0	0	0	0	0	0	0	0	0	0	0	0	0	0
NPC2	1	0	0	0	0	0	0	0	0	0	0	0	0	0.141344	0	0	0	0	0	0	0	0	0	0	0	0	0	0	0	0	0	0	0	0	0	0	0	0	0	0	0	0	0	0	0	0	0	0	0
PLEKHA8	1	0	0	0	0	0	0	0	0	0	0	0	0	0.115057	0	0	0	0	0	0	0	0	0	0	0	0	0	0	0	0	0	0	0	0	0	0	0	0	0	0	0	0	0	0	0	0	0	0	0
COL4A3BP	2	0	0	0	0	0	0	0	0	0	0	0.16587	0	0.16587	0	0	0	0	0	0	0	0	0	0	0	0	0	0	0	0	0	0	0	0	0	0	0	0	0	0	0	0	0	0	0	0	0	0	0
KCNJ3	2	0	0	0	0	0	0	0	0	0	0	0	0	0	0	0	0	0	0	0	0	0	0	0	0	0	0	0	0	0	0	0	0	0	0	0	0	0	0	0	0	0	0	0	0	0	0	0	0
KCNJ8	2	0	0	0	0	0	0	0	0	0	0	0	0	0	0	0	0	0	0	0	0	0	0	0	0	0	0	0	0	0	0	0	0	0	0	0	0	0	0	0	0	0	0	0	0	0	0	0	0
KCNJ11	2	0	0	0	0	0	0	0	0	0	0	0	0	0	0	0	0	0	0	0	0	0	0	0	0	0	0	0	0	0	0	0	0	0	0	0	0	0	0	0	0	0	0	0	0	0	0	0	0
KCNJ14	2	0	0	0	0	0	0	0	0	0	0	0	0	0	0	0	0	0	0	0	0	0	0	0	0	0	0	0	0	0	0	0	0	0	0	0	0	0	0	0	0	0	0	0	0	0	0	0	0
ABCC9	2	0	0	0	0	0	0	0	0	0	0	0	0	0	0	0	0	0	0	0	0	0	0	0	0	0	0	0	0	0	0	0	0	0	0	0	0	0	0	0	0	0	0	0	0	0	0	0	0
KCNC1	1	0	0	0	0	0	0	0	0	0	0	0	0	0	0	0	0	0	0	0	0	0	0	0	0	0	0	0	0	0	0	0	0	0	0	0	0	0	0	0	0	0	0	0	0	0	0	0	0
KCNC2	1	0	0	0	0	0	0	0	0	0	0	0	0	0	0	0	0	0	0	0	0	0	0	0	0	0	0	0	0	0	0	0	0	0	0	0	0	0	0	0	0	0	0	0	0	0	0	0	0
KCNC3	1	0	0	0	0	0	0	0	0	0	0	0	0	0	0	0	0	0	0	0	0	0	0	0	0	0	0	0	0	0	0	0	0	0	0	0	0	0	0	0	0	0	0	0	0	0	0	0	0
KCNC4	1	0	0	0	0	0	0	0	0	0	0	0	0	0	0	0	0	0	0	0	0	0	0	0	0	0	0	0	0	0	0	0	0	0	0	0	0	0	0	0	0	0	0	0	0	0	0	0	0
SLC18A2	1	0	0	0	0	0	0	0	0	0	0	0	0	0	0	0	0	0	0	0	0	0	0	0	0	0	0	0	0	0	0	0	0	0	0	0	0	0	0	0	0	0	0	0	0	0	0	0	0
TMEM175	1	0	0	0	0	0	0	0	0	0	0	0	0	0	0	0	0	0	0	0	0	0	0	0	0	0	0	0	0	0	0	0	0	0	0	0	0	0	0	0	0	0	0	0	0	0	0	0	0
KCNA1	1	0	0	0	0	0	0	0	0	0	0	0	0	0	0	0	0	0	0	0	0	0	0	0	0	0	0	0	0	0	0	0	0	0	0	0	0	0	0	0	0	0	0	0	0	0	0	0	0
KCNA2	1	0	0	0	0	0	0	0	0	0	0	0	0	0	0	0	0	0	0	0	0	0	0	0	0	0	0	0	0	0	0	0	0	0	0	0	0	0	0	0	0	0	0	0	0	0	0	0	0
KCNA3	1	0	0	0	0	0	0	0	0	0	0	0	0	0	0	0	0	0	0	0	0	0	0	0	0	0	0	0	0	0	0	0	0	0	0	0	0	0	0	0	0	0	0	0	0	0	0	0	0
SLC17A4	1	0	0	0	0	0	0	0	0	0	0	0	0	0	0	0	0	0	0	0	0	0	0	0	0	0	0	0	0	0	0	0	0	0	0	0	0	0	0	0	0	0	0	0	0	0	0	0	0
CCT8L2	1	0	0	0	0	0	0	0	0	0	0	0	0	0	0	0	0	0	0	0	0	0	0	0	0	0	0	0	0	0	0	0	0	0	0	0	0	0	0	0	0	0	0	0	0	0	0	0	0
KCNH6	1	0	0	0	0	0	0	0	0	0	0	0	0	0	0	0	0	0	0	0	0	0	0	0	0	0	0	0	0	0	0	0	0	0	0	0	0	0	0	0	0	0	0	0	0	0	0	0	0
KCNH8	1	0	0	0	0	0	0	0	0	0	0	0	0	0	0	0	0	0	0	0	0	0	0	0	0	0	0	0	0	0	0	0	0	0	0	0	0	0	0	0	0	0	0	0	0	0	0	0	0
KCNK5	1	0	0	0	0	0	0	0	0	0	0	0	0	0	0	0	0	0	0	0	0	0	0	0	0	0	0	0	0	0	0	0	0	0	0	0	0	0	0	0	0	0	0	0	0	0	0	0	0
KCNK7	1	0	0	0	0	0	0	0	0	0	0	0	0	0	0	0	0	0	0	0	0	0	0	0	0	0	0	0	0	0	0	0	0	0	0	0	0	0	0	0	0	0	0	0	0	0	0	0	0
KCNAB1	1	0	0	0	0	0	0	0	0	0	0	0	0	0	0	0	0	0	0	0	0	0	0	0	0	0	0	0	0	0	0	0	0	0	0	0	0	0	0	0	0	0	0	0	0	0	0	0	0
KCNAB3	1	0	0	0	0	0	0	0	0	0	0	0	0	0	0	0	0	0	0	0	0	0	0	0	0	0	0	0	0	0	0	0	0	0	0	0	0	0	0	0	0	0	0	0	0	0	0	0	0
SLC12A5	1	0	0	0	0	0	0	0	0	0	0	0	0	0	0	0	0	0	0	0	0	0	0	0	0	0	0	0	0	0	0	0	0	0	0	0	0	0	0	0	0	0	0	0	0	0	0	0	0
EDNRA	1	0	0	0	0	0	0	0	0	0	0	0	0	0	0	0	0	0	0	0	0	0	0	0	0	0	0	0	0	0	0	0	0	0	0	0	0	0	0	0	0	0	0	0	0	0	0	0	0
SLC34A3	1	0	0	0	0	0	0	0	0	0	0	0	0	0	0	0	0	0	0	0	0	0	0	0	0	0	0	0	0	0	0	0	0	0	0	0	0	0	0	0	0	0	0	0	0	0	0	0	0
KCNK15	1	0	0	0	0	0	0	0	0	0	0	0	0	0	0	0	0	0	0	0	0	0	0	0	0	0	0	0	0	0	0	0	0	0	0	0	0	0	0	0	0	0	0	0	0	0	0	0	0
KCNQ5	1	0	0	0	0	0	0	0	0	0	0	0	0	0	0	0	0	0	0	0	0	0	0	0	0	0	0	0	0	0	0	0	0	0	0	0	0	0	0	0	0	0	0	0	0	0	0	0	0
SEC14L1	1	0	0	0	0	0	0	0	0	0	0	0	0	0	0	0	0	0	0	0	0	0	0	0	0	0	0	0	0	0	0	0	0	0	0	0	0	0	0	0	0	0	0	0	0	0	0	0	0
SCN2B	1	0	0	0	0	0	0	0	0	0	0	0	0	0	0	0	0	0	0	0	0	0	0	0	0	0	0	0	0	0	0	0	0	0	0	0	0	0	0	0	0	0	0	0	0	0	0	0	0
KCNS1	1	0	0	0	0	0	0	0	0	0	0	0	0	0	0	0	0	0	0	0	0	0	0	0	0	0	0	0	0	0	0	0	0	0	0	0	0	0	0	0	0	0	0	0	0	0	0	0	0
KCNS3	1	0	0	0	0	0	0	0	0	0	0	0	0	0	0	0	0	0	0	0	0	0	0	0	0	0	0	0	0	0	0	0	0	0	0	0	0	0	0	0	0	0	0	0	0	0	0	0	0
NSF	1	0	0	0	0	0	0	0	0	0	0	0	0	0	0	0	0	0	0	0	0	0	0	0	0	0	0	0	0	0	0	0	0	0	0	0	0	0	0	0	0	0	0	0	0	0	0	0	0
TAF7	1	0	0	0	0	0	0	0	0	0	0	0	0	0	0	0	0	0	0	0	0	0	0	0	0	0	0	0	0	0	0	0	0	0	0	0	0	0	0	0	0	0	0	0	0	0	0	0	0
SLC6A8	4	0	0	0	0	0	0	0	0	0	0	0	0	0	0.203496	0.203496	0	0	0	0	0	0	0	0	0	0	0	0	0	0	0	0	0	0	0	0	0	0	0	0	0	0	0	0	0	0	0	0	0
SLC38A1	4	0	0	0	0	0	0	0	0	0	0	0	0	0	0.213686	0.213686	0	0	0	0	0	0	0	0	0	0	0	0	0	0	0	0	0	0	0	0	0	0	0	0	0	0	0	0	0	0	0	0	0
SLC38A10	4	0	0	0	0	0	0	0	0	0	0	0	0	0	0.107796	0.107796	0	0	0	0	0	0	0	0	0	0	0	0	0	0	0	0	0	0	0	0	0	0	0	0	0	0	0	0	0	0	0	0	0
SLC38A2	4	0	0	0	0	0	0	0	0	0	0	0	0	0	0.145143	0.145143	0	0	0	0	0	0	0	0	0	0	0	0	0	0	0	0	0	0	0	0	0	0	0	0	0	0	0	0	0	0	0	0	0
SLC13A3	4	0	0	0	0	0	0	0	0	0	0	0	0	0	0.115256	0.115256	0	0	0	0	0	0	0	0	0	0	0	0	0	0	0	0	0	0	0	0	0	0	0	0	0	0	0	0	0	0	0	0	0
SLC22A5	4	0	0	0	0	0	0	0	0	0	0	0	0	0	0.123328	0	0	0	0	0	0	0	0	0.123328	0	0	0	0	0	0	0	0	0	0	0	0	0	0	0	0	0	0	0	0	0	0	0	0	0
SCN1A	3	0	0	0	0	0	0	0	0	0.251815	0	0	0	0	0	0	0	0	0	0	0	0	0	0	0	0	0	0	0	0	0	0	0	0	0	0	0	0	0	0	0	0	0	0	0	0	0	0	0
SLC5A2	2	0	0	0	0	0	0	0	0	0	0	0	0	0	0	0	0	0	0	0	0	0	0	0	0	0	0	0	0	0	0	0	0	0	0	0	0	0	0	0	0	0	0	0	0	0	0	0	0
SLC24A2	2	0	0	0	0	0	0	0	0	0	0	0	0	0	0	0	0	0	0	0	0	0	0	0	0	0	0	0	0	0	0	0	0	0	0	0	0	0	0	0	0	0	0	0	0	0	0	0	0
SLC5A11	2	0	0	0	0	0	0	0	0	0	0	0	0	0	0	0	0	0	0	0	0	0	0	0	0	0	0	0	0	0	0	0	0	0	0	0	0	0	0	0	0	0	0	0	0	0	0	0	0
SLC5A10	2	0	0	0	0	0	0	0	0	0	0	0	0	0	0	0	0	0	0	0	0	0	0	0	0	0	0	0	0	0	0	0	0	0	0	0	0	0	0	0	0	0	0	0	0	0	0	0	0
SLC12A2	2	0	0	0	0	0	0	0	0	0	0	0	0	0	0	0	0	0	0	0	0	0	0	0	0	0	0	0	0	0	0	0	0	0	0	0	0	0	0	0	0	0	0	0	0	0	0	0	0
SCN1B	2	0	0	0	0	0	0	0	0	0	0	0	0	0	0	0	0	0	0	0	0	0	0	0	0	0	0	0	0	0	0	0	0	0	0	0	0	0	0	0	0	0	0	0	0	0	0	0	0
TRPM2	2	0	0	0	0	0	0	0	0	0	0	0	0	0	0	0	0	0	0	0	0	0	0	0	0	0	0	0	0	0	0	0	0	0	0	0	0	0	0	0	0	0	0	0	0	0	0	0	0
COMMD9	2	0	0	0	0	0	0	0	0	0	0	0	0	0	0	0	0	0	0	0	0	0	0	0	0	0	0	0	0	0	0	0	0	0	0	0	0	0	0	0	0	0	0	0	0	0	0	0	0
TRPM4	2	0	0	0	0	0	0	0	0	0	0	0	0	0	0	0	0	0	0	0	0	0	0	0	0	0	0	0	0	0	0	0	0	0	0	0	0	0	0	0	0	0	0	0	0	0	0	0	0
COMMD3	2	0	0	0	0	0	0	0	0	0	0	0	0	0	0	0	0	0	0	0	0	0	0	0	0	0	0	0	0	0	0	0	0	0	0	0	0	0	0	0	0	0	0	0	0	0	0	0	0
SLC20A2	2	0	0	0	0	0	0	0	0	0	0	0	0	0	0	0	0	0	0	0	0	0	0	0	0	0	0	0	0	0	0	0	0	0	0	0	0	0	0	0	0	0	0	0	0	0	0	0	0
SCN8A	2	0	0	0	0	0	0	0	0	0	0	0	0	0	0	0	0	0	0	0	0	0	0	0	0	0	0	0	0	0	0	0	0	0	0	0	0	0	0	0	0	0	0	0	0	0	0	0	0
SCN4B	2	0	0	0	0	0	0	0	0	0	0	0	0	0	0	0	0	0	0	0	0	0	0	0	0	0	0	0	0	0	0	0	0	0	0	0	0	0	0	0	0	0	0	0	0	0	0	0	0
HCN4	2	0	0	0	0	0	0	0	0	0	0	0	0	0	0	0	0	0	0	0	0	0	0	0	0	0	0	0	0	0	0	0	0	0	0	0	0	0	0	0	0	0	0	0	0	0	0	0	0
SLC3A2	2	0	0	0	0	0	0	0	0	0	0	0	0	0	0	0	0	0	0	0	0	0	0	0	0	0	0	0	0	0	0	0	0	0	0	0	0	0	0	0	0	0	0	0	0	0	0	0	0
SLC4A8	2	0	0	0	0	0	0	0	0	0	0	0	0	0	0	0	0	0	0	0	0	0	0	0	0	0	0	0	0	0	0	0	0	0	0	0	0	0	0	0	0	0	0	0	0	0	0	0	0
SLC4A9	2	0	0	0	0	0	0	0	0	0	0	0	0	0	0	0	0	0	0	0	0	0	0	0	0	0	0	0	0	0	0	0	0	0	0	0	0	0	0	0	0	0	0	0	0	0	0	0	0
HCN2	2	0	0	0	0	0	0	0	0	0	0	0	0	0	0	0	0	0	0	0	0	0	0	0	0	0	0	0	0	0	0	0	0	0	0	0	0	0	0	0	0	0	0	0	0	0	0	0	0
HCN1	2	0	0	0	0	0	0	0	0	0	0	0	0	0	0	0	0	0	0	0	0	0	0	0	0	0	0	0	0	0	0	0	0	0	0	0	0	0	0	0	0	0	0	0	0	0	0	0	0
[truncated: 27 more columns]

## Sheet: Motor subcortical +
Name	# genesets	GO_RESPONSE_TO_TYPE_I_INTERFERON_signal	GO_AEROBIC_RESPIRATION_signal	GO_HEME_METABOLIC_PROCESS_signal	GO_ENSHEATHMENT_OF_NEURONS_signal	GO_OLIGODENDROCYTE_DIFFERENTIATION_signal	GO_INTEGRIN_MEDIATED_SIGNALING_PATHWAY_signal
CPOX	1	0	0	0.383617	0	0	0
SLC11A2	1	0	0	0.342555	0	0	0
HMBS	1	0	0	0.270027	0	0	0
FECH	1	0	0	0.360359	0	0	0
COX15	1	0	0	0.252113	0	0	0
HMOX1	1	0	0	0.356903	0	0	0
HMOX2	1	0	0	0.340765	0	0	0
ALAS1	1	0	0	0.2645	0	0	0
ALAD	1	0	0	0.246678	0	0	0
TSPO	1	0	0	0.215324	0	0	0
BDH2	1	0	0	0.257042	0	0	0
IFITM3	1	0.250866	0	0	0	0	0
IFITM1	1	0.307357	0	0	0	0	0
IFITM2	1	0.230397	0	0	0	0	0
IFI35	1	0.231257	0	0	0	0	0
IFIT2	1	0.276673	0	0	0	0	0
IFNAR2	1	0.198127	0	0	0	0	0
HLA-H	1	0.155047	0	0	0	0	0
HLA-B	1	0.194651	0	0	0	0	0
HLA-C	1	0.19749	0	0	0	0	0
HLA-A	1	0.170015	0	0	0	0	0
HLA-F	1	0.128515	0	0	0	0	0
HLA-G	1	0.143236	0	0	0	0	0
HLA-E	1	0.215371	0	0	0	0	0
IFI27	1	0.295467	0	0	0	0	0
IP6K2	1	0.220714	0	0	0	0	0
BST2	1	0.27387	0	0	0	0	0
ISG20	1	0.272755	0	0	0	0	0
XAF1	1	0.269839	0	0	0	0	0
TYK2	1	0.169834	0	0	0	0	0
IRF3	1	0.124654	0	0	0	0	0
OAS3	1	0.216768	0	0	0	0	0
IRF2	1	0.123773	0	0	0	0	0
IRF7	1	0.302065	0	0	0	0	0
IRF9	1	0.13144	0	0	0	0	0
TRIM56	1	0.321242	0	0	0	0	0
SP100	1	0.23811	0	0	0	0	0
STAT2	1	0.28344	0	0	0	0	0
MX2	1	0.229742	0	0	0	0	0
MX1	1	0.147023	0	0	0	0	0
PSMB8	1	0.238543	0	0	0	0	0
CHCHD5	1	0	0.166254	0	0	0	0
PMPCB	1	0	0.149619	0	0	0	0
SDHC	1	0	0.268656	0	0	0	0
SDHA	1	0	0.337015	0	0	0	0
SDHB	1	0	0.262897	0	0	0	0
OXA1L	1	0	0.146827	0	0	0	0
UQCRC1	1	0	0.176905	0	0	0	0
SUCLG2	1	0	0.164753	0	0	0	0
SUCLG1	1	0	0.260045	0	0	0	0
UQCRC2	1	0	0.130568	0	0	0	0
COX19	1	0	0.238725	0	0	0	0
UQCRH	1	0	0.137987	0	0	0	0
BLOC1S1	1	0	0.17168	0	0	0	0
NDUFV1	1	0	0.221293	0	0	0	0
SURF1	1	0	0.129906	0	0	0	0
IDH2	1	0	0.173549	0	0	0	0
ACO2	1	0	0.155263	0	0	0	0
DHTKD1	1	0	0.254124	0	0	0	0
IDH3B	1	0	0.220722	0	0	0	0
CAT	1	0	0.12913	0	0	0	0
MTFR1	1	0	0.323417	0	0	0	0
DLD	1	0	0.189479	0	0	0	0
FH	1	0	0.129849	0	0	0	0
DLST	1	0	0.341887	0	0	0	0
UQCR10	1	0	0.192359	0	0	0	0
PDHB	1	0	0.151265	0	0	0	0
IDH3G	1	0	0.238863	0	0	0	0
SUCLA2	1	0	0.148144	0	0	0	0
AKT2	1	0	0	0	0.297413	0	0
DICER1	1	0	0	0	0.336032	0	0
MAL	1	0	0	0	0.408773	0	0
MTMR2	1	0	0	0	0.40318	0	0
ZNF24	1	0	0	0	0.30597	0	0
NDRG1	1	0	0	0	0.416325	0	0
KLK6	1	0	0	0	0.389015	0	0
UGT8	1	0	0	0	0.418786	0	0
QKI	1	0	0	0	0.285315	0	0
SERINC5	1	0	0	0	0.347322	0	0
GAL3ST1	1	0	0	0	0.363784	0	0
PRX	1	0	0	0	0.320292	0	0
PLLP	1	0	0	0	0.386108	0	0
SIRT2	1	0	0	0	0.420739	0	0
CLDN11	1	0	0	0	0.400459	0	0
LAMA2	1	0	0	0	0.369438	0	0
SH3TC2	1	0	0	0	0.449703	0	0
JAM3	1	0	0	0	0.380937	0	0
PMP22	1	0	0	0	0.385364	0	0
HDAC11	1	0	0	0	0	0.35123	0
SOX8	1	0	0	0	0	0.338058	0
SOX10	1	0	0	0	0	0.376216	0
CNP	1	0	0	0	0	0.460632	0
NKX6-1	1	0	0	0	0	0.328955	0
NKX2-2	1	0	0	0	0	0.258365	0
EIF2B4	1	0	0	0	0	0.223966	0
EIF2B2	1	0	0	0	0	0.201069	0
MED12	1	0	0	0	0	0.208195	0
DUSP10	1	0	0	0	0	0.364268	0
EIF2B1	1	0	0	0	0	0.246948	0
ZNF488	1	0	0	0	0	0.412293	0
BOK	1	0	0	0	0	0.370911	0
OLIG1	1	0	0	0	0	0.338734	0
CDKN2C	1	0	0	0	0	0.314949	0
GSN	1	0	0	0	0	0.206702	0
PLP1	3	0	0	0	0.426931	0.426931	0.426931
NKX6-2	2	0	0	0	0.379125	0.379125	0
LPAR1	2	0	0	0	0.38956	0.38956	0
FA2H	2	0	0	0	0.448936	0.448936	0
CNTN2	2	0	0	0	0.406021	0.406021	0
OLIG2	2	0	0	0	0.348426	0.348426	0
KCNJ10	2	0	0	0	0.354113	0.354113	0
CD9	2	0	0	0	0.398182	0.398182	0
COL16A1	1	0	0	0	0	0	0.335285
CTGF	1	0	0	0	0	0	0.180991
ADAM10	1	0	0	0	0	0	0.155153
ADAM15	1	0	0	0	0	0	0.239462
ADAM9	1	0	0	0	0	0	0.195802
SEMA7A	1	0	0	0	0	0	0.429408
FUT8	1	0	0	0	0	0	0.429942
PTK2	1	0	0	0	0	0	0.306943
DAB2	1	0	0	0	0	0	0.135979
ITGB1	1	0	0	0	0	0	0.233372
ITGAM	1	0	0	0	0	0	0.207348
ITGB5	1	0	0	0	0	0	0.237533
ITGB2	1	0	0	0	0	0	0.14415
ILK	1	0	0	0	0	0	0.197769
ITGAE	1	0	0	0	0	0	0.239009
ADAMTS1	1	0	0	0	0	0	0.191912
ITGAX	1	0	0	0	0	0	0.1641
ITGAV	1	0	0	0	0	0	0.341474
VAV3	1	0	0	0	0	0	0.228184
DST	1	0	0	0	0	0	0.253657
SYK	1	0	0	0	0	0	0.160292
ITGA2	1	0	0	0	0	0	0.392651
ITGA1	1	0	0	0	0	0	0.22399
FGR	1	0	0	0	0	0	0.34423
HCK	1	0	0	0	0	0	0.134359
CEACAM1	1	0	0	0	0	0	0.170362
MYH9	1	0	0	0	0	0	0.246843
ITGA6	1	0	0	0	0	0	0.245125
ITGB1BP1	1	0	0	0	0	0	0.226839
CD47	1	0	0	0	0	0	0.226571
DOCK1	1	0	0	0	0	0	0.389176
PRAM1	1	0	0	0	0	0	0.170385
ZYX	1	0	0	0	0	0	0.2203
BCAR1	1	0	0	0	0	0	0.285113

## Sheet: Motor subcortical -
Name	# genesets	GO_PHOTORECEPTOR_CELL_DEVELOPMENT_signal	GO_EPITHELIAL_CILIUM_MOVEMENT_signal	GO_CILIUM_MOVEMENT_signal	GO_AXONEME_ASSEMBLY_signal	GO_CILIUM_ORGANIZATION_signal	GO_CILIUM_MORPHOGENESIS_signal	GO_PROTEIN_TRANSPORT_ALONG_MICROTUBULE_signal	GO_FOREBRAIN_REGIONALIZATION_signal	GO_BETA_CATENIN_TCF_COMPLEX_ASSEMBLY_signal	GO_TELOMERE_CAPPING_signal	GO_NEGATIVE_REGULATION_OF_MEGAKARYOCYTE_DIFFERENTIATION_signal	GO_NEGATIVE_REGULATION_OF_HEMATOPOIETIC_PROGENITOR_CELL_DIFFERENTIATION_signal	GO_PROTEIN_HETEROTETRAMERIZATION_signal	GO_DNA_REPLICATION_DEPENDENT_NUCLEOSOME_ORGANIZATION_signal	GO_CHROMATIN_SILENCING_AT_RDNA_signal	GO_CENTROMERE_COMPLEX_ASSEMBLY_signal	GO_HISTONE_EXCHANGE_signal	GO_PROTEIN_KINASE_C_ACTIVATING_G_PROTEIN_COUPLED_RECEPTOR_SIGNALING_PATHWAY_signal	GO_MATING_signal	GO_REPRODUCTIVE_BEHAVIOR_signal	GO_MATING_BEHAVIOR_signal	GO_FEEDING_BEHAVIOR_signal	GO_NEUROPEPTIDE_SIGNALING_PATHWAY_signal	GO_NEGATIVE_REGULATION_OF_AMINE_TRANSPORT_signal	GO_RETINAL_GANGLION_CELL_AXON_GUIDANCE_signal	GO_MOTOR_NEURON_AXON_GUIDANCE_signal	GO_INNERVATION_signal	GO_DENDRITE_DEVELOPMENT_signal	GO_REGULATION_OF_DENDRITIC_SPINE_MORPHOGENESIS_signal	GO_REGULATION_OF_DENDRITIC_SPINE_DEVELOPMENT_signal	GO_POSITIVE_REGULATION_OF_DENDRITIC_SPINE_DEVELOPMENT_signal	GO_REGULATION_OF_DENDRITE_MORPHOGENESIS_signal	GO_REGULATION_OF_DENDRITE_DEVELOPMENT_signal	GO_POSITIVE_REGULATION_OF_DENDRITE_MORPHOGENESIS_signal	GO_REGULATION_OF_CLATHRIN_MEDIATED_ENDOCYTOSIS_signal	GO_EXPLORATION_BEHAVIOR_signal	GO_SYNAPTIC_TRANSMISSION_GLUTAMATERGIC_signal	GO_NEURON_NEURON_SYNAPTIC_TRANSMISSION_signal	GO_FEAR_RESPONSE_signal	GO_MULTICELLULAR_ORGANISMAL_RESPONSE_TO_STRESS_signal	GO_LEARNING_signal	GO_SINGLE_ORGANISM_BEHAVIOR_signal	GO_REGULATION_OF_SYNAPTIC_TRANSMISSION_GLUTAMATERGIC_signal	GO_SYNAPTIC_SIGNALING_signal	GO_CALCIUM_ION_REGULATED_EXOCYTOSIS_OF_NEUROTRANSMITTER_signal	GO_POSITIVE_REGULATION_OF_CALCIUM_ION_DEPENDENT_EXOCYTOSIS_signal	GO_REGULATION_OF_CALCIUM_ION_DEPENDENT_EXOCYTOSIS_signal	GO_REGULATION_OF_NEUROTRANSMITTER_SECRETION_signal
MAPK8IP2	10	0	0	0	0	0	0	0	0	0	0	0	0	0	0	0	0	0	0	-0.091289	-0.091289	-0.091289	0	0	0	0	0	0	-0.091289	0	0	0	0	0	0	0	0	0	0	-0.091289	-0.091289	-0.091289	-0.091289	0	-0.091289	0	0	0	0
TH	11	-0.150622	0	0	0	0	0	0	0	0	0	0	0	0	0	0	0	0	0	-0.150622	-0.150622	-0.150622	-0.150622	0	0	0	0	0	0	0	0	0	0	0	0	0	0	0	-0.150622	0	0	-0.150622	-0.150622	0	-0.150622	0	0	0	0
NPAS1	1	0	0	0	0	0	0	0	0	0	0	0	0	0	0	0	0	0	0	0	-0.118176	0	0	0	0	0	0	0	0	0	0	0	0	0	0	0	0	0	0	0	0	0	0	0	0	0	0	0	0
GNAQ	2	0	0	0	0	0	0	0	0	0	0	0	0	0	0	0	0	0	0	0	-0.093069	0	0	0	0	0	0	0	0	0	0	0	0	0	0	0	0	0	0	0	0	0	0	0	-0.093069	0	0	0	0
SERPINE2	1	0	0	0	0	0	0	0	0	0	0	0	0	0	0	0	0	0	0	0	0	-0.073897	0	0	0	0	0	0	0	0	0	0	0	0	0	0	0	0	0	0	0	0	0	0	0	0	0	0	0
GRN	7	0	0	0	0	0	0	0	0	0	0	0	0	0	0	0	0	0	0	-0.103184	-0.103184	-0.103184	0	0	0	0	0	0	0	0	-0.103184	-0.103184	0	-0.103184	0	0	0	0	0	0	0	0	0	0	0	0	0	0	0
HEXB	3	0	0	0	0	0	0	0	0	0	0	0	0	0	0	0	0	0	0	-0.102827	-0.102827	-0.102827	0	0	0	0	0	0	0	0	0	0	0	0	0	0	0	0	0	0	0	0	0	0	0	0	0	0	0
THRB	3	0	0	0	0	0	0	0	0	0	0	0	0	0	0	0	0	0	0	-0.141387	-0.141387	-0.141387	0	0	0	0	0	0	0	0	0	0	0	0	0	0	0	0	0	0	0	0	0	0	0	0	0	0	0
NCOA2	4	0	0	0	0	0	0	0	0	0	0	0	0	0	0	0	0	0	0	-0.223998	-0.223998	-0.223998	0	0	0	0	0	0	0	0	0	0	0	0	0	0	0	0	0	0	0	0	-0.223998	0	0	0	0	0	0
AVP	4	0	0	0	0	0	0	0	0	0	0	0	0	0	0	0	0	0	0	-0.095115	-0.095115	-0.095115	0	0	0	0	0	0	0	0	0	0	0	0	0	0	0	0	0	0	0	0	-0.095115	0	0	0	0	0	0
THRA	4	0	0	0	0	0	0	0	0	0	0	0	0	0	0	0	0	0	0	-0.139931	-0.139931	-0.139931	0	0	0	0	0	0	0	0	0	0	0	0	0	0	0	0	0	0	0	0	-0.139931	0	0	0	0	0	0
UBE2Q1	5	0	0	0	0	0	0	0	0	0	0	0	0	0	0	0	0	0	0	-0.202878	-0.202878	-0.202878	-0.202878	0	0	0	0	0	0	0	0	0	0	0	0	0	0	0	0	0	0	0	0	0	0	0	0	0	0
KLK14	1	0	0	0	0	0	0	0	0	0	0	0	0	0	0	0	0	0	0	-0.159148	0	0	0	0	0	0	0	0	0	0	0	0	0	0	0	0	0	0	0	0	0	0	0	0	0	0	0	0	0
ACVR2A	1	0	0	0	0	0	0	0	0	0	0	0	0	0	0	0	0	0	0	-0.241924	0	0	0	0	0	0	0	0	0	0	0	0	0	0	0	0	0	0	0	0	0	0	0	0	0	0	0	0	0
PACSIN1	2	0	0	0	0	0	0	0	0	0	0	0	0	0	0	0	0	0	0	0	0	0	0	0	0	0	0	0	0	0	0	0	0	-0.09023	0	0	0	0	0	0	0	0	0	0	0	0	0	0	0
DENND1A	1	0	0	0	0	0	0	0	0	0	0	0	0	0	0	0	0	0	0	0	0	0	0	0	0	0	0	0	0	0	0	0	0	0	0	0	0	0	0	0	0	0	0	0	0	0	0	0	0
STON2	1	0	0	0	0	0	0	0	0	0	0	0	0	0	0	0	0	0	0	0	0	0	0	0	0	0	0	0	0	0	0	0	0	0	0	0	0	0	0	0	0	0	0	0	0	0	0	0	0
CANX	1	0	0	0	0	0	0	0	0	0	0	0	0	0	0	0	0	0	0	0	0	0	0	0	0	0	0	0	0	0	0	0	0	0	0	0	0	0	0	0	0	0	0	0	0	0	0	0	0
DDC	1	0	0	0	0	0	0	0	0	0	0	0	0	0	0	0	0	0	0	0	0	0	0	0	0	0	0	0	0	0	0	0	0	0	0	0	0	0	0	0	0	0	0	0	0	0	0	0	0
PPP3CA	5	0	0	0	0	0	0	0	0	0	0	0	0	0	0	0	0	0	0	0	0	0	0	0	0	0	0	0	0	0	0	0	-0.173661	-0.173661	0	0	0	0	0	0	-0.173661	0	0	0	-0.173661	0	0	0	0
CDKL5	3	0	0	0	0	0	0	0	0	0	0	0	0	0	0	0	0	0	0	0	0	0	0	0	0	0	0	0	0	0	0	0	-0.110557	-0.110557	-0.110557	0	0	0	0	0	0	0	0	0	0	0	0	0	0
CUL7	3	0	0	0	0	0	0	0	0	0	0	0	0	0	0	0	0	0	0	0	0	0	0	0	0	0	0	0	0	0	0	0	-0.292744	-0.292744	-0.292744	0	0	0	0	0	0	0	0	0	0	0	0	0	0
FBXO31	3	0	0	0	0	0	0	0	0	0	0	0	0	0	0	0	0	0	0	0	0	0	0	0	0	0	0	0	0	0	0	0	-0.152145	-0.152145	-0.152145	0	0	0	0	0	0	0	0	0	0	0	0	0	0
RAB21	3	0	0	0	0	0	0	0	0	0	0	0	0	0	0	0	0	0	0	0	0	0	0	0	0	0	0	0	0	0	0	0	-0.104769	-0.104769	-0.104769	0	0	0	0	0	0	0	0	0	0	0	0	0	0
NUMBL	3	0	0	0	0	0	0	0	0	0	0	0	0	0	0	0	0	0	0	0	0	0	0	0	0	0	0	0	0	0	0	0	-0.307633	-0.307633	-0.307633	0	0	0	0	0	0	0	0	0	0	0	0	0	0
AKAP5	4	0	0	0	0	0	0	0	0	0	0	0	0	0	0	0	0	0	0	0	0	0	0	0	0	0	0	0	0	0	0	0	-0.200908	-0.200908	-0.200908	0	0	0	0	0	0	0	0	0	-0.200908	0	0	0	0
SDC2	3	0	0	0	0	0	0	0	0	0	0	0	0	0	0	0	0	0	0	0	0	0	0	0	0	0	0	0	-0.250108	0	0	0	-0.250108	-0.250108	0	0	0	0	0	0	0	0	0	0	0	0	0	0	0
SARM1	2	0	0	0	0	0	0	0	0	0	0	0	0	0	0	0	0	0	0	0	0	0	0	0	0	0	0	0	0	0	0	0	-0.121809	-0.121809	0	0	0	0	0	0	0	0	0	0	0	0	0	0	0
RAP2A	2	0	0	0	0	0	0	0	0	0	0	0	0	0	0	0	0	0	0	0	0	0	0	0	0	0	0	0	0	0	0	0	-0.138346	-0.138346	0	0	0	0	0	0	0	0	0	0	0	0	0	0	0
NEUROG3	2	0	0	0	0	0	0	0	0	0	0	0	0	0	0	0	0	0	0	0	0	0	0	0	0	0	0	0	0	0	0	0	-0.088794	-0.088794	0	0	0	0	0	0	0	0	0	0	0	0	0	0	0
NGEF	4	0	0	0	0	0	0	0	0	0	0	0	0	0	0	0	0	0	0	0	0	0	0	0	0	0	0	0	0	-0.197941	-0.197941	0	-0.197941	-0.197941	0	0	0	0	0	0	0	0	0	0	0	0	0	0	0
CFL1	4	0	0	0	0	0	0	0	0	0	0	0	0	0	0	0	0	0	0	0	0	0	0	0	0	0	0	0	0	-0.152047	-0.152047	0	-0.152047	-0.152047	0	0	0	0	0	0	0	0	0	0	0	0	0	0	0
CDK5R1	5	0	0	0	0	0	0	0	0	0	0	0	0	0	0	0	0	0	0	0	0	0	0	0	0	0	0	0	0	-0.286564	-0.286564	0	-0.286564	-0.286564	0	0	0	0	0	0	0	0	0	0	-0.286564	0	0	0	0
EPHA4	6	0	0	0	0	0	0	0	0	0	0	0	0	0	0	0	0	0	0	0	0	0	0	0	0	0	0	0	0	-0.105496	-0.105496	0	-0.105496	-0.105496	-0.105496	0	0	0	0	0	0	0	-0.105496	0	0	0	0	0	0
PAK3	7	0	0	0	0	0	0	0	0	0	0	0	0	0	0	0	0	0	0	0	0	0	0	0	0	0	0	0	-0.35199	-0.35199	-0.35199	-0.35199	-0.35199	-0.35199	-0.35199	0	0	0	0	0	0	0	0	0	0	0	0	0	0
LRP8	7	0	0	0	0	0	0	0	0	0	0	0	0	0	0	0	0	0	0	0	0	0	0	0	0	0	0	0	0	-0.177666	-0.177666	-0.177666	-0.177666	-0.177666	-0.177666	0	0	0	0	0	0	0	0	0	0	0	0	0	0
MARCKS	6	0	0	0	0	0	0	0	0	0	0	0	0	0	0	0	0	0	0	0	0	0	0	0	0	0	0	0	0	-0.164838	-0.164838	-0.164838	-0.164838	-0.164838	-0.164838	0	0	0	0	0	0	0	0	0	0	0	0	0	0
TIAM1	6	0	0	0	0	0	0	0	0	0	0	0	0	0	0	0	0	0	0	0	0	0	0	0	0	0	0	0	0	-0.127955	-0.127955	-0.127955	-0.127955	-0.127955	-0.127955	0	0	0	0	0	0	0	0	0	0	0	0	0	0
CAPRIN2	6	0	0	0	0	0	0	0	0	0	0	0	0	0	0	0	0	0	0	0	0	0	0	0	0	0	0	0	0	-0.323678	-0.323678	-0.323678	-0.323678	-0.323678	-0.323678	0	0	0	0	0	0	0	0	0	0	0	0	0	0
FSTL4	2	0	0	0	0	0	0	0	0	0	0	0	0	0	0	0	0	0	0	0	0	0	0	0	0	0	0	0	0	0	-0.091976	0	0	-0.091976	0	0	0	0	0	0	0	0	0	0	0	0	0	0	0
PALM	3	0	0	0	0	0	0	0	0	0	0	0	0	0	0	0	0	0	0	0	0	0	0	0	0	0	0	0	0	0	-0.164569	-0.164569	0	-0.164569	0	0	0	0	0	0	0	0	0	0	0	0	0	0	0
SDK1	3	0	0	0	0	0	0	0	0	0	0	0	0	0	0	0	0	0	0	0	0	0	0	0	0	0	0	0	0	0	-0.187948	0	0	-0.187948	0	0	0	0	0	0	0	0	-0.187948	0	0	0	0	0	0
KIAA0319	1	0	0	0	0	0	0	0	0	0	0	0	0	0	0	0	0	0	0	0	0	0	0	0	0	0	0	0	0	0	0	0	0	-0.260364	0	0	0	0	0	0	0	0	0	0	0	0	0	0	0
OPA1	1	0	0	0	0	0	0	0	0	0	0	0	0	0	0	0	0	0	0	0	0	0	0	0	0	0	0	0	0	0	0	0	0	-0.136748	0	0	0	0	0	0	0	0	0	0	0	0	0	0	0
CAMK1D	1	0	0	0	0	0	0	0	0	0	0	0	0	0	0	0	0	0	0	0	0	0	0	0	0	0	0	0	0	0	0	0	0	-0.16446	0	0	0	0	0	0	0	0	0	0	0	0	0	0	0
CARM1	1	0	0	0	0	0	0	0	0	0	0	0	0	0	0	0	0	0	0	0	0	0	0	0	0	0	0	0	0	0	0	0	0	-0.20223	0	0	0	0	0	0	0	0	0	0	0	0	0	0	0
HCRT	8	0	0	0	0	0	0	0	0	0	0	0	0	0	0	0	0	0	-0.2048	0	0	0	-0.2048	-0.2048	0	0	0	0	0	0	0	0	0	0	0	0	0	0	0	0	0	0	0	0	-0.2048	0	0	0	-0.2048
SYT11	7	0	0	0	0	0	0	0	0	0	0	0	0	0	0	0	0	0	0	0	0	0	0	0	0	0	0	0	0	0	0	0	0	0	0	0	0	0	0	0	0	0	0	0	-0.093825	0	0	0	-0.093825
RIMS1	12	0	0	0	0	0	0	0	0	0	0	0	0	0	0	0	0	0	0	0	0	0	0	0	0	0	0	0	0	0	0	0	0	0	0	0	0	0	0	0	0	0	0	0	-0.106457	0	0	0	-0.106457
STX1B	13	0	0	0	0	0	0	0	0	0	0	0	0	0	0	0	0	0	0	0	0	0	0	0	0	0	0	0	0	0	0	0	0	0	0	0	0	0	0	0	0	0	0	0	-0.120917	0	0	-0.120917	-0.120917
STX1A	14	0	0	0	0	0	0	0	0	0	0	0	0	0	0	0	0	0	0	0	0	0	0	0	0	0	0	0	0	0	0	0	0	0	0	0	0	0	0	0	0	0	0	0	-0.32797	0	-0.32797	-0.32797	-0.32797
RIMS3	6	0	0	0	0	0	0	0	0	0	0	0	0	0	0	0	0	0	0	0	0	0	0	0	0	0	0	0	0	0	0	0	0	0	0	0	0	0	0	0	0	0	0	0	0	0	0	-0.120872	-0.120872
PFN2	6	0	0	0	0	0	0	0	0	0	0	0	0	0	0	0	0	0	0	0	0	0	0	0	0	0	0	0	0	0	0	0	0	0	0	0	0	0	0	0	0	0	0	0	0	0	0	-0.147845	-0.147845
GRIK5	9	0	0	0	0	0	0	0	0	0	0	0	0	0	0	0	0	0	0	0	0	0	0	0	0	0	0	0	0	0	0	0	0	0	0	0	0	-0.125106	-0.125106	0	0	0	0	0	-0.125106	0	0	-0.125106	-0.125106
STXBP1	12	0	0	0	0	0	0	0	0	0	0	0	0	0	0	0	0	0	0	0	0	0	0	0	0	0	0	0	0	0	0	0	0	0	0	0	0	0	0	0	0	0	0	0	-0.142296	0	-0.142296	-0.142296	-0.142296
SYN1	9	0	0	0	0	0	0	0	0	0	0	0	0	0	0	0	0	0	0	0	0	0	0	0	0	0	0	0	0	0	0	0	0	0	0	0	0	0	0	0	0	0	0	0	-0.279742	0	0	-0.279742	-0.279742
TOR1A	6	0	0	0	0	0	0	0	0	0	0	0	0	0	0	0	0	0	0	0	0	0	0	0	0	0	0	0	0	0	0	0	0	0	0	-0.12944	0	0	0	0	0	0	0	0	0	0	0	0	0
PER2	3	0	0	0	0	0	0	0	0	0	0	0	0	0	0	0	0	0	0	0	0	0	0	0	0	0	0	0	0	0	0	0	0	0	0	0	0	0	0	0	0	0	0	0	0	0	0	0	0
PTGER4	5	0	0	0	0	0	0	0	0	0	0	0	0	0	0	0	0	0	0	0	0	0	0	0	0	0	0	0	0	0	0	0	0	0	0	0	0	0	0	0	0	0	0	0	0	0	0	0	-0.090042
SNCAIP	4	0	0	0	0	0	0	0	0	0	0	0	0	0	0	0	0	0	0	0	0	0	0	0	0	0	0	0	0	0	0	0	0	0	0	0	0	0	0	0	0	0	0	0	0	0	0	0	-0.197265
SLC30A1	4	0	0	0	0	0	0	0	0	0	0	0	0	0	0	0	0	0	0	0	0	0	0	0	0	0	0	0	0	0	0	0	0	0	0	0	0	0	0	0	0	0	0	0	0	0	0	0	-0.127162
LRRK2	15	0	0	0	0	0	0	0	0	0	0	0	0	0	0	0	0	0	0	0	0	0	0	0	0	0	0	0	0	-0.132143	-0.132143	0	-0.132143	-0.132143	0	0	-0.132143	0	0	0	0	0	-0.132143	-0.132143	-0.132143	0	0	-0.132143	-0.132143
CHRNA3	6	0	0	0	0	0	0	0	0	0	0	0	0	0	0	0	0	0	0	0	0	0	0	0	0	0	0	0	0	0	0	0	-0.087438	-0.087438	0	0	0	0	0	0	0	0	-0.087438	0	-0.087438	0	0	0	-0.087438
NLGN1	29	0	0	0	0	0	0	0	0	0	0	0	0	-0.185582	0	0	0	0	0	0	0	0	0	0	0	0	0	0	0	-0.185582	-0.185582	-0.185582	-0.185582	-0.185582	0	-0.185582	0	0	0	0	0	0	0	-0.185582	-0.185582	0	-0.185582	-0.185582	-0.185582
MEF2C	14	0	0	0	0	0	0	0	0	0	0	0	0	0	0	0	0	0	0	0	0	0	0	0	0	0	0	0	0	0	-0.259539	0	0	-0.259539	0	0	0	0	0	0	0	0	-0.259539	-0.259539	-0.259539	0	0	0	-0.259539
PPP1R9A	14	0	0	0	0	0	0	0	0	0	0	0	0	0	0	0	0	0	0	0	0	0	0	0	0	0	0	0	0	-0.117599	-0.117599	-0.117599	-0.117599	-0.117599	0	0	0	0	0	0	0	0	0	0	-0.117599	0	0	0	-0.117599
ACHE	3	0	0	0	0	0	0	0	0	0	0	0	0	0	0	0	0	0	0	0	0	0	0	0	0	0	0	0	0	0	0	0	0	0	0	0	0	0	0	0	0	0	0	0	-0.113188	0	0	0	0
GABRA2	2	0	0	0	0	0	0	0	0	0	0	0	0	0	0	0	0	0	0	0	0	0	0	0	0	0	0	0	0	0	0	0	0	0	0	0	0	0	0	0	0	0	0	0	-0.289319	0	0	0	0
GCHFR	1	0	0	0	0	0	0	0	0	0	0	0	0	0	0	0	0	0	0	0	0	0	0	0	0	0	0	0	0	0	0	0	0	0	0	0	0	0	0	0	0	0	0	0	0	0	0	0	0
DAGLB	1	0	0	0	0	0	0	0	0	0	0	0	0	0	0	0	0	0	0	0	0	0	0	0	0	0	0	0	0	0	0	0	0	0	0	0	0	0	0	0	0	0	0	0	0	0	0	0	0
ALDH5A1	1	0	0	0	0	0	0	0	0	0	0	0	0	0	0	0	0	0	0	0	0	0	0	0	0	0	0	0	0	0	0	0	0	0	0	0	0	0	0	0	0	0	0	0	0	0	0	0	0
COLQ	5	0	0	0	0	0	0	0	0	0	0	0	0	0	0	0	0	0	0	0	0	0	0	0	0	0	0	0	0	0	0	0	0	0	0	0	0	0	0	0	0	0	0	0	-0.237812	0	0	0	0
NRXN3	8	0	0	0	0	0	0	0	0	0	0	0	0	0	0	0	0	0	0	0	0	0	0	0	0	0	0	0	0	0	0	0	0	0	0	0	0	0	0	0	0	-0.101523	-0.101523	0	-0.101523	0	0	0	0
SYNJ1	11	0	0	0	0	0	0	0	0	0	0	0	0	0	0	0	0	0	0	0	0	0	0	0	0	0	0	0	0	0	0	0	0	0	0	-0.219834	0	0	0	0	0	-0.219834	-0.219834	0	-0.219834	0	0	0	0
RIMS2	10	0	0	0	0	0	0	0	0	0	0	0	0	0	0	0	0	0	0	0	0	0	0	0	0	0	0	0	0	0	0	0	0	0	0	0	0	0	0	0	0	0	0	0	-0.181681	-0.181681	0	0	0
SYT1	11	0	0	0	0	0	0	0	0	0	0	0	0	0	0	0	0	0	0	0	0	0	0	0	0	0	0	0	0	0	0	0	0	0	0	0	0	0	0	0	0	0	0	-0.19886	-0.19886	-0.19886	-0.19886	-0.19886	0
LIN7A	3	0	0	0	0	0	0	0	0	0	0	0	0	0	0	0	0	0	0	0	0	0	0	0	0	0	0	0	0	0	0	0	0	0	0	0	0	0	0	0	0	0	0	0	-0.1133	0	0	0	0
APBA1	3	0	0	0	0	0	0	0	0	0	0	0	0	0	0	0	0	0	0	0	0	0	0	0	0	0	0	0	0	0	0	0	0	0	0	0	0	0	0	0	0	0	0	0	-0.111588	0	0	0	0
NAAA	4	0	0	0	0	0	0	0	0	0	0	0	0	0	0	0	0	0	0	0	0	0	0	0	0	0	0	0	0	0	0	0	0	0	0	0	0	0	0	0	0	0	0	0	-0.123897	0	0	0	0
LIN7C	4	0	0	0	0	0	0	0	0	0	0	0	0	0	0	0	0	0	0	0	0	0	0	0	0	0	0	0	0	0	0	0	0	0	0	0	0	0	0	0	0	0	0	0	-0.186186	0	0	0	0
LIN7B	4	0	0	0	0	0	0	0	0	0	0	0	0	0	0	0	0	0	0	0	0	0	0	0	0	0	0	0	0	0	0	0	0	0	0	0	0	0	0	0	0	0	0	0	-0.247086	0	0	0	0
BAIAP3	4	0	0	0	0	0	0	0	0	0	0	0	0	0	0	0	0	0	0	0	0	0	0	0	0	0	0	0	0	0	0	0	0	0	0	0	0	0	0	0	0	0	0	0	-0.321631	0	0	0	0
PTPRN2	4	0	0	0	0	0	0	0	0	0	0	0	0	0	0	0	0	0	0	0	0	0	0	0	0	0	0	0	0	0	0	0	0	0	0	0	0	0	0	0	0	0	0	0	-0.304838	0	0	0	0
SYN2	4	0	0	0	0	0	0	0	0	0	0	0	0	0	0	0	0	0	0	0	0	0	0	0	0	0	0	0	0	0	0	0	0	0	0	0	0	0	0	0	0	0	0	0	-0.349891	0	0	0	0
GAD1	4	0	0	0	0	0	0	0	0	0	0	0	0	0	0	0	0	0	0	0	0	0	0	0	0	0	0	0	0	0	0	0	0	0	0	0	0	0	0	0	0	0	0	0	-0.124871	0	0	0	0
PPFIA2	4	0	0	0	0	0	0	0	0	0	0	0	0	0	0	0	0	0	0	0	0	0	0	0	0	0	0	0	0	0	0	0	0	0	0	0	0	0	0	0	0	0	0	0	-0.146448	0	0	0	0
CASK	4	0	0	0	0	0	0	0	0	0	0	0	0	0	0	0	0	0	0	0	0	0	0	0	0	0	0	0	0	0	0	0	0	0	0	0	0	0	0	0	0	0	0	0	-0.189726	0	0	0	0
CACNA1B	5	0	0	0	0	0	0	0	0	0	0	0	0	0	0	0	0	0	0	0	0	0	0	0	0	0	0	0	0	0	0	0	0	0	0	0	0	0	0	0	-0.231708	0	0	0	-0.231708	0	0	0	0
SLC18A2	6	0	0	0	0	0	0	0	0	0	0	0	0	0	0	0	0	0	0	0	0	0	0	0	0	0	0	0	0	0	0	0	0	0	0	0	0	0	0	0	0	0	0	0	-0.199065	0	0	0	0
DNAJC5	5	0	0	0	0	0	0	0	0	0	0	0	0	0	0	0	0	0	0	0	0	0	0	0	0	0	0	0	0	0	0	0	0	0	0	0	0	0	0	0	0	0	0	0	-0.132813	0	0	0	0
OTOF	5	0	0	0	0	0	0	0	0	0	0	0	0	0	0	0	0	0	0	0	0	0	0	0	0	0	0	0	0	0	0	0	0	0	0	0	0	0	0	0	0	0	0	0	-0.161901	0	0	0	0
PCLO	5	0	0	0	0	0	0	0	0	0	0	0	0	0	0	0	0	0	0	0	0	0	0	0	0	0	0	0	0	0	0	0	0	0	0	0	0	0	0	0	0	0	0	0	-0.126966	0	0	0	0
CADPS2	5	0	0	0	0	0	0	0	0	0	0	0	0	0	0	0	0	0	0	0	0	0	0	0	0	0	0	0	0	0	0	0	0	0	0	0	0	0	0	0	0	0	0	0	-0.281673	0	0	0	0
SYT10	8	0	0	0	0	0	0	0	0	0	0	0	0	0	0	0	0	0	0	0	0	0	0	0	0	0	0	0	0	0	0	0	0	0	0	0	0	0	0	0	0	0	0	0	-0.246897	-0.246897	-0.246897	-0.246897	0
DOC2B	8	0	0	0	0	0	0	0	0	0	0	0	0	0	0	0	0	0	0	0	0	0	0	0	0	0	0	0	0	0	0	0	0	0	0	0	0	0	0	0	0	0	0	0	-0.26025	-0.26025	-0.26025	-0.26025	0
SYT7	7	0	0	0	0	0	0	0	0	0	0	0	0	0	0	0	0	0	0	0	0	0	0	0	0	0	0	0	0	0	0	0	0	0	0	0	0	0	0	0	0	0	0	0	-0.123737	0	-0.123737	-0.123737	0
TRIM9	6	0	0	0	0	0	0	0	0	0	0	0	0	0	0	0	0	0	0	0	0	0	0	0	0	0	0	0	0	0	0	0	0	0	0	0	0	0	0	0	0	0	0	0	-0.160137	0	0	-0.160137	0
SYTL5	7	0	0	0	0	0	0	0	0	0	0	0	0	0	0	0	0	0	0	0	0	0	0	0	0	0	0	0	0	0	0	0	0	0	0	0	0	0	0	0	0	0	0	0	-0.284218	-0.284218	0	-0.284218	0
RPH3A	7	0	0	0	0	0	0	0	0	0	0	0	0	0	0	0	0	0	0	0	0	0	0	0	0	0	0	0	0	0	0	0	0	0	0	0	0	0	0	0	0	0	0	0	-0.250877	-0.250877	0	-0.250877	0
TC2N	7	0	0	0	0	0	0	0	0	0	0	0	0	0	0	0	0	0	0	0	0	0	0	0	0	0	0	0	0	0	0	0	0	0	0	0	0	0	0	0	0	0	0	0	-0.181908	-0.181908	0	-0.181908	0
SYT16	7	0	0	0	0	0	0	0	0	0	0	0	0	0	0	0	0	0	0	0	0	0	0	0	0	0	0	0	0	0	0	0	0	0	0	0	0	0	0	0	0	0	0	0	-0.226456	-0.226456	0	-0.226456	0
SYT14	7	0	0	0	0	0	0	0	0	0	0	0	0	0	0	0	0	0	0	0	0	0	0	0	0	0	0	0	0	0	0	0	0	0	0	0	0	0	0	0	0	0	0	0	-0.311316	-0.311316	0	-0.311316	0
SYT17	7	0	0	0	0	0	0	0	0	0	0	0	0	0	0	0	0	0	0	0	0	0	0	0	0	0	0	0	0	0	0	0	0	0	0	0	0	0	0	0	0	0	0	0	-0.233586	-0.233586	0	-0.233586	0
C2CD4C	7	0	0	0	0	0	0	0	0	0	0	0	0	0	0	0	0	0	0	0	0	0	0	0	0	0	0	0	0	0	0	0	0	0	0	0	0	0	0	0	0	0	0	0	-0.251361	-0.251361	0	-0.251361	0
DOC2A	7	0	0	0	0	0	0	0	0	0	0	0	0	0	0	0	0	0	0	0	0	0	0	0	0	0	0	0	0	0	0	0	0	0	0	0	0	0	0	0	0	0	0	0	-0.221463	-0.221463	0	-0.221463	0
SYT5	7	0	0	0	0	0	0	0	0	0	0	0	0	0	0	0	0	0	0	0	0	0	0	0	0	0	0	0	0	0	0	0	0	0	0	0	0	0	0	0	0	0	0	0	-0.288389	-0.288389	0	-0.288389	0
SYT4	7	0	0	0	0	0	0	0	0	0	0	0	0	0	0	0	0	0	0	0	0	0	0	0	0	0	0	0	0	0	0	0	0	0	0	0	0	0	0	0	0	0	0	0	-0.391686	-0.391686	0	-0.391686	0
SYT6	7	0	0	0	0	0	0	0	0	0	0	0	0	0	0	0	0	0	0	0	0	0	0	0	0	0	0	0	0	0	0	0	0	0	0	0	0	0	0	0	0	0	0	0	-0.203406	-0.203406	0	-0.203406	0
CDK5	15	0	0	0	0	0	0	0	0	0	0	0	0	0	0	0	0	0	0	0	0	0	0	0	0	0	0	0	-0.094327	0	-0.094327	0	-0.094327	-0.094327	0	0	0	0	-0.094327	0	0	-0.094327	-0.094327	0	-0.094327	0	0	0	0
VAMP2	10	0	0	0	0	0	0	0	0	0	0	0	0	0	0	0	0	0	0	0	0	0	0	0	0	0	0	0	0	0	0	0	0	0	0	0	0	0	0	0	0	0	0	0	-0.194944	0	0	0	0
SNAP25	12	0	0	0	0	0	0	0	0	0	0	0	0	0	0	0	0	0	0	0	0	0	0	0	0	0	0	0	0	0	0	0	0	0	0	0	0	0	0	0	0	-0.302796	-0.302796	0	-0.302796	0	0	0	0
PPFIA3	7	0	0	0	0	0	0	0	0	0	0	0	0	0	0	0	0	0	0	0	0	0	0	0	0	0	0	0	0	0	0	0	0	0	0	0	0	0	0	0	0	0	0	0	-0.089859	0	0	0	0
SNAP47	8	0	0	0	0	0	0	0	0	0	0	0	0	0	0	0	0	0	0	0	0	0	0	0	0	0	0	0	0	0	0	0	0	0	0	0	0	0	0	0	0	0	0	0	-0.093721	0	0	0	0
CPLX2	7	0	0	0	0	0	0	0	0	0	0	0	0	0	0	0	0	0	0	0	0	0	0	0	0	0	0	0	0	0	0	0	0	0	0	0	0	0	0	0	0	0	0	0	-0.090514	0	0	0	0
UNC13A	16	0	0	0	0	0	0	0	0	0	0	0	0	0	0	0	0	0	0	0	0	0	0	0	0	0	0	-0.176201	0	0	0	0	0	0	0	0	0	-0.176201	-0.176201	0	0	0	0	-0.176201	-0.176201	0	0	0	-0.176201
RAB3GAP1	11	0	0	0	0	0	0	0	0	0	0	0	0	0	0	0	0	0	0	0	0	0	0	0	0	0	0	0	0	0	0	0	0	0	0	0	0	0	0	0	0	0	0	-0.105791	-0.105791	0	0	0	-0.105791
CAMK2A	7	0	0	0	0	0	0	0	0	0	0	0	0	0	0	0	0	0	0	0	0	0	0	0	0	0	0	0	0	0	0	0	0	0	0	0	0	0	0	0	0	0	0	0	0	0	0	0	-0.178495
RAB3A	11	0	0	0	0	0	0	0	0	0	0	0	0	0	0	0	0	0	0	0	0	0	0	0	0	0	0	0	0	0	0	0	0	0	0	0	0	0	0	0	0	0	0	0	-0.093681	0	0	0	-0.093681
SNCA	15	0	0	0	0	0	0	0	0	0	0	0	0	0	0	0	0	0	0	0	0	0	0	0	-0.089675	0	0	0	0	0	0	0	0	0	0	0	0	0	-0.089675	0	0	0	-0.089675	0	-0.089675	0	0	0	-0.089675
CNIH2	6	0	0	0	0	0	0	0	0	0	0	0	0	0	0	0	0	0	0	0	0	0	0	0	0	0	0	0	0	0	0	0	0	0	0	0	0	-0.321205	-0.321205	0	0	0	0	0	-0.321205	0	0	0	0
CNIH3	5	0	0	0	0	0	0	0	0	0	0	0	0	0	0	0	0	0	0	0	0	0	0	0	0	0	0	0	0	0	0	0	0	0	0	0	0	-0.234243	-0.234243	0	0	0	0	0	-0.234243	0	0	0	0
CACNG8	2	0	0	0	0	0	0	0	0	0	0	0	0	0	0	0	0	0	0	0	0	0	0	0	0	0	0	0	0	0	0	0	0	0	0	0	0	0	0	0	0	0	0	0	0	0	0	0	0
CACNG3	2	0	0	0	0	0	0	0	0	0	0	0	0	0	0	0	0	0	0	0	0	0	0	0	0	0	0	0	0	0	0	0	0	0	0	0	0	0	0	0	0	0	0	0	0	0	0	0	0
CACNG4	2	0	0	0	0	0	0	0	0	0	0	0	0	0	0	0	0	0	0	0	0	0	0	0	0	0	0	0	0	0	0	0	0	0	0	0	0	0	0	0	0	0	0	0	0	0	0	0	0
MINK1	4	0	0	0	0	0	0	0	0	0	0	0	0	0	0	0	0	0	0	0	0	0	0	0	0	0	0	0	-0.256214	0	0	0	0	0	0	0	0	0	0	0	0	0	0	0	-0.256214	0	0	0	0
CELF4	2	0	0	0	0	0	0	0	0	0	0	0	0	0	0	0	0	0	0	0	0	0	0	0	0	0	0	0	0	0	0	0	0	0	0	0	0	0	0	0	0	0	0	0	0	0	0	0	0
DAPK1	1	0	0	0	0	0	0	0	0	0	0	0	0	0	0	0	0	0	0	0	0	0	0	0	0	0	0	0	0	0	0	0	0	0	0	0	0	0	0	0	0	0	0	0	0	0	0	0	0
NETO2	1	0	0	0	0	0	0	0	0	0	0	0	0	0	0	0	0	0	0	0	0	0	0	0	0	0	0	0	0	0	0	0	0	0	0	0	0	0	0	0	0	0	0	0	0	0	0	0	0
CSPG5	1	0	0	0	0	0	0	0	0	0	0	0	0	0	0	0	0	0	0	0	0	0	0	0	0	0	0	0	0	0	0	0	0	0	0	0	0	0	0	0	0	0	0	0	0	0	0	0	0
PPP1R9B	1	0	0	0	0	0	0	0	0	0	0	0	0	0	0	0	0	0	0	0	0	0	0	0	0	0	0	0	0	0	0	0	0	0	0	0	0	0	0	0	0	0	0	0	0	0	0	0	0
CNR2	1	0	0	0	0	0	0	0	0	0	0	0	0	0	0	0	0	0	0	0	0	0	0	0	0	0	0	0	0	0	0	0	0	0	0	0	0	0	0	0	0	0	0	0	0	0	0	0	0
ADCYAP1	7	0	0	0	0	0	0	0	0	0	0	0	0	0	0	0	0	0	0	0	0	0	0	-0.139243	0	0	0	0	0	0	0	0	0	0	0	0	0	0	0	-0.139243	-0.139243	0	-0.139243	-0.139243	0	0	0	0	0
UCN	7	0	0	0	0	0	0	0	0	0	0	0	0	0	0	0	0	0	0	0	0	0	-0.132684	-0.132684	0	0	0	0	0	0	0	0	0	0	0	0	0	0	0	0	-0.132684	-0.132684	-0.132684	-0.132684	0	0	0	0	0
NPY2R	9	0	0	0	0	0	0	0	0	0	0	0	0	0	0	0	0	0	0	0	0	0	-0.130349	-0.130349	0	0	0	0	0	0	0	0	0	0	0	0	0	0	0	-0.130349	-0.130349	0	-0.130349	-0.130349	-0.130349	0	0	0	0
GRM7	9	0	0	0	0	0	0	0	0	0	0	0	0	0	0	0	0	0	0	0	0	0	-0.333836	0	-0.333836	0	0	0	0	0	0	0	0	0	0	0	0	0	0	-0.333836	-0.333836	-0.333836	-0.333836	-0.333836	-0.333836	0	0	0	0
PRKACA	2	0	0	0	0	0	0	0	0	0	0	0	0	0	0	0	0	0	0	0	0	0	0	0	0	0	0	0	0	0	0	0	0	0	0	0	0	0	0	0	0	0	0	-0.116382	0	0	0	0	0
OPHN1	3	0	0	0	0	0	0	0	0	0	0	0	0	0	0	0	0	0	0	0	0	0	0	0	0	0	0	0	0	0	0	0	0	0	0	0	0	0	0	0	0	0	0	-0.30176	0	0	0	0	0
HTR2A	4	0	0	0	0	0	0	0	0	0	0	0	0	0	0	0	0	0	0	0	0	0	0	0	0	0	0	0	0	0	0	0	0	0	0	0	0	0	0	0	0	0	-0.274503	-0.274503	-0.274503	0	0	0	0
GRM2	3	0	0	0	0	0	0	0	0	0	0	0	0	0	0	0	0	0	0	0	0	0	0	0	0	0	0	0	0	0	0	0	0	0	0	0	0	0	0	0	0	0	0	-0.115307	-0.115307	0	0	0	0
CNR1	4	0	0	0	0	0	0	0	0	0	0	0	0	0	0	0	0	0	0	0	0	0	0	0	-0.205955	0	0	0	0	0	0	0	0	0	0	0	0	0	0	0	0	0	-0.205955	-0.205955	0	0	0	0	0
ABAT	7	0	0	0	0	0	0	0	0	0	0	0	0	0	0	0	0	0	0	-0.190245	0	0	0	0	-0.190245	0	0	0	0	0	0	0	0	0	0	0	-0.190245	0	0	0	0	0	-0.190245	0	0	0	0	0	0
PRKCE	4	0	0	0	0	0	0	0	0	0	0	0	0	0	0	0	0	0	0	0	0	0	0	0	0	0	0	0	0	0	0	0	0	0	0	0	-0.220072	0	0	0	0	0	-0.220072	0	0	0	0	0	0
NTSR1	6	0	0	0	0	0	0	0	0	0	0	0	0	0	0	0	0	0	0	0	0	0	0	-0.293567	0	0	0	0	0	0	0	0	0	0	0	0	0	0	0	0	0	-0.293567	-0.293567	0	-0.293567	0	0	0	0
TAC1	8	0	0	0	0	0	0	0	0	0	0	0	0	0	0	0	0	0	0	-0.171429	0	0	0	-0.171429	0	0	0	0	0	0	0	0	0	0	0	0	0	0	0	0	-0.171429	-0.171429	-0.171429	0	-0.171429	0	0	0	0
KISS1R	3	0	0	0	0	0	0	0	0	0	0	0	0	0	0	0	0	0	0	0	0	0	0	-0.135058	0	0	0	0	0	0	0	0	0	0	0	0	0	0	0	0	0	0	0	0	0	0	0	0	0
CA7	2	0	0	0	0	0	0	0	0	0	0	0	0	0	0	0	0	0	0	0	0	0	0	0	0	0	0	0	0	0	0	0	0	0	0	0	0	0	0	0	0	0	0	0	0	0	0	0	0
RETN	2	0	0	0	0	0	0	0	0	0	0	0	0	0	0	0	0	0	0	0	0	0	0	0	0	0	0	0	0	0	0	0	0	0	0	0	0	0	0	0	0	0	0	0	0	0	0	0	0
LGI1	2	0	0	0	0	0	0	0	0	0	0	0	0	0	0	0	0	0	0	0	0	0	0	0	0	0	0	0	0	0	0	0	0	0	0	0	0	0	0	0	0	0	0	0	0	0	0	0	0
FLRT3	2	0	0	0	0	0	0	0	0	0	0	0	0	0	0	0	0	0	0	0	0	0	0	0	0	0	0	0	0	0	0	0	0	0	0	0	0	0	0	0	0	0	0	0	0	0	0	0	0
CBLN2	2	0	0	0	0	0	0	0	0	0	0	0	0	0	0	0	0	0	0	0	0	0	0	0	0	0	0	0	0	0	0	0	0	0	0	0	0	0	0	0	0	0	0	0	0	0	0	0	0
SLITRK6	6	0	0	0	0	0	0	0	0	0	0	0	0	0	0	0	0	0	0	0	0	0	0	0	0	0	0	-0.139777	0	0	0	0	0	0	0	0	0	0	0	0	0	0	-0.139777	0	0	0	0	0	0
SLITRK5	7	0	0	0	0	0	0	0	0	0	0	0	0	0	0	0	0	0	0	0	0	0	0	0	0	0	0	0	-0.240011	0	0	0	0	0	0	0	0	0	0	0	0	0	-0.240011	0	-0.240011	0	0	0	0
EPHB1	6	0	0	0	0	0	0	0	0	0	0	0	0	0	0	0	0	0	0	0	0	0	0	0	0	-0.115223	0	0	-0.115223	0	0	0	0	0	0	0	0	0	0	0	0	0	0	0	0	0	0	0	0
EFNA5	5	0	0	0	0	0	0	0	0	0	0	0	0	0	0	0	0	0	0	0	0	0	0	0	0	-0.117412	0	0	0	0	0	0	0	0	0	0	0	0	0	0	0	0	0	0	0	0	0	0	0
SLITRK2	3	0	0	0	0	0	0	0	0	0	0	0	0	0	0	0	0	0	0	0	0	0	0	0	0	0	0	0	0	0	0	0	0	0	0	0	0	0	0	0	0	0	0	0	0	0	0	0	0
AMIGO2	3	0	0	0	0	0	0	0	0	0	0	0	0	0	0	0	0	0	0	0	0	0	0	0	0	0	0	0	0	0	0	0	0	0	0	0	0	0	0	0	0	0	0	0	0	0	0	0	0
FLRT2	4	0	0	0	0	0	0	0	0	0	0	0	0	0	0	0	0	0	0	0	0	0	0	0	0	0	0	0	0	0	0	0	0	0	0	0	0	0	0	0	0	0	0	0	0	0	0	0	0
LRRC24	4	0	0	0	0	0	0	0	0	0	0	0	0	0	0	0	0	0	0	0	0	0	0	0	0	0	0	0	0	0	0	0	0	0	0	0	0	0	0	0	0	0	0	0	0	0	0	0	0
LRRC4B	4	0	0	0	0	0	0	0	0	0	0	0	0	0	0	0	0	0	0	0	0	0	0	0	0	0	0	0	0	0	0	0	0	0	0	0	0	0	0	0	0	0	0	0	0	0	0	0	0
BDNF	4	0	0	0	0	0	0	0	0	0	0	0	0	0	0	0	0	0	0	0	0	0	0	0	0	0	0	0	0	0	0	0	0	0	0	0	0	0	0	0	0	0	0	0	0	0	0	0	0
SLITRK4	4	0	0	0	0	0	0	0	0	0	0	0	0	0	0	0	0	0	0	0	0	0	0	0	0	0	0	0	0	0	0	0	0	0	0	0	0	0	0	0	0	0	0	0	0	0	0	0	0
SLITRK3	4	0	0	0	0	0	0	0	0	0	0	0	0	0	0	0	0	0	0	0	0	0	0	0	0	0	0	0	0	0	0	0	0	0	0	0	0	0	0	0	0	0	0	0	0	0	0	0	0
LINGO2	4	0	0	0	0	0	0	0	0	0	0	0	0	0	0	0	0	0	0	0	0	0	0	0	0	0	0	0	0	0	0	0	0	0	0	0	0	0	0	0	0	0	0	0	0	0	0	0	0
NTRK3	4	0	0	0	0	0	0	0	0	0	0	0	0	0	0	0	0	0	0	0	0	0	0	0	0	0	0	0	0	0	0	0	0	0	0	0	0	0	0	0	0	0	0	0	0	0	0	0	0
LRRN3	4	0	0	0	0	0	0	0	0	0	0	0	0	0	0	0	0	0	0	0	0	0	0	0	0	0	0	0	0	0	0	0	0	0	0	0	0	0	0	0	0	0	0	0	0	0	0	0	0
AMIGO3	4	0	0	0	0	0	0	0	0	0	0	0	0	0	0	0	0	0	0	0	0	0	0	0	0	0	0	0	0	0	0	0	0	0	0	0	0	0	0	0	0	0	0	0	0	0	0	0	0
UBE2V2	4	0	0	0	0	0	0	0	0	0	0	0	0	0	0	0	0	0	0	0	0	0	0	0	0	0	0	0	0	0	0	0	0	0	0	0	0	0	0	0	0	0	0	0	0	0	0	0	0
LRRTM3	4	0	0	0	0	0	0	0	0	0	0	0	0	0	0	0	0	0	0	0	0	0	0	0	0	0	0	0	0	0	0	0	0	0	0	0	0	0	0	0	0	0	0	0	0	0	0	0	0
OXT	11	0	0	0	0	0	0	0	0	0	0	0	0	0	0	0	0	0	0	-0.119497	-0.119497	-0.119497	-0.119497	0	0	0	0	0	0	0	0	0	0	0	0	0	0	0	0	0	0	0	-0.119497	0	0	0	0	0	0
CLSTN2	6	0	0	0	0	0	0	0	0	0	0	0	0	0	0	0	0	0	0	0	0	0	0	0	0	0	0	0	0	0	0	0	0	0	0	0	0	0	0	0	0	0	0	0	0	0	0	0	0
ADNP	6	0	0	0	0	0	0	0	0	0	0	0	0	0	0	0	0	0	0	0	0	0	0	0	0	0	0	0	0	0	0	0	0	0	0	0	0	0	0	0	0	0	-0.116683	0	0	0	0	0	0
LRRTM1	10	0	0	0	0	0	0	0	0	0	0	0	0	0	0	0	0	0	0	0	0	0	0	0	0	0	0	0	0	0	0	0	0	0	0	0	-0.132623	0	0	0	0	0	-0.132623	0	0	0	0	0	0
LRRTM2	8	0	0	0	0	0	0	0	0	0	0	0	0	0	0	0	0	0	0	0	0	0	0	0	0	0	0	0	0	0	0	0	0	0	0	0	0	0	0	0	0	0	0	0	0	0	0	0	0
NLGN2	12	0	0	0	0	0	0	0	0	0	0	0	0	0	0	0	0	0	0	0	0	0	0	0	0	0	0	0	0	0	0	0	0	0	0	0	-0.188776	0	0	0	0	0	-0.188776	-0.188776	0	0	0	0	0
NRXN1	17	0	0	0	0	0	0	0	0	0	0	0	0	0	0	0	0	0	0	0	0	0	0	0	0	0	0	0	0	0	0	0	0	0	0	0	0	0	0	0	0	-0.119497	-0.119497	-0.119497	-0.119497	0	0	0	0
IGSF9	3	0	0	0	0	0	0	0	0	0	0	0	0	0	0	0	0	0	0	0	0	0	0	0	0	0	0	0	-0.111164	0	0	0	0	0	0	0	0	0	0	0	0	0	0	0	0	0	0	0	0
KLK8	3	0	0	0	0	0	0	0	0	0	0	0	0	0	0	0	0	0	0	0	0	0	0	0	0	0	0	0	0	0	0	0	0	0	0	0	0	0	0	0	0	0	-0.088472	0	0	0	0	0	0
FRMPD4	2	0	0	0	0	0	0	0	0	0	0	0	0	0	0	0	0	0	0	0	0	0	0	0	0	0	0	0	0	0	0	0	0	0	0	0	0	0	0	0	0	0	0	0	0	0	0	0	0
CDH2	2	0	0	0	0	0	0	0	0	0	0	0	0	0	0	0	0	0	0	0	0	0	0	0	0	0	0	0	0	0	0	0	0	0	0	0	0	0	0	0	0	0	0	0	0	0	0	0	0
C1QL3	2	0	0	0	0	0	0	0	0	0	0	0	0	0	0	0	0	0	0	0	0	0	0	0	0	0	0	0	0	0	0	0	0	0	0	0	0	0	0	0	0	0	0	0	0	0	0	0	0
CDC42	2	0	0	0	0	0	0	0	0	0	0	0	0	0	0	0	0	0	0	0	0	0	0	0	0	0	0	0	0	0	0	0	0	0	0	0	0	0	0	0	0	0	0	0	0	0	0	0	0
CRIPT	2	0	0	0	0	0	0	0	0	0	0	0	0	0	0	0	0	0	0	0	0	0	0	0	0	0	0	0	0	0	0	0	0	0	0	0	0	0	0	0	0	0	0	0	0	0	0	0	0
CAMK1	5	0	0	0	0	0	0	0	0	0	0	0	0	0	0	0	0	0	0	0	0	0	0	0	0	0	0	0	0	0	-0.22612	-0.22612	0	-0.22612	0	0	0	0	0	0	0	0	0	0	0	0	0	0	0
NEDD4	4	0	0	0	0	0	0	0	0	0	0	0	0	0	0	0	0	0	0	0	0	0	0	0	0	0	0	0	0	0	0	0	-0.111377	-0.111377	0	0	0	0	0	0	0	0	0	0	0	0	0	0	0
BHLHB9	11	0	0	0	0	0	0	0	0	0	0	0	0	0	0	0	0	0	0	0	0	0	0	0	0	0	0	0	0	-0.289569	-0.289569	-0.289569	-0.289569	-0.289569	-0.289569	0	0	0	0	0	0	0	-0.289569	0	0	0	0	0	0
EEF2K	10	0	0	0	0	0	0	0	0	0	0	0	0	0	0	0	0	0	0	0	0	0	0	0	0	0	0	0	0	-0.123824	-0.123824	-0.123824	-0.123824	-0.123824	-0.123824	0	0	0	0	0	0	0	0	0	0	0	0	0	0
PDLIM5	7	0	0	0	0	0	0	0	0	0	0	0	0	0	0	0	0	0	0	0	0	0	0	0	0	0	0	0	0	-0.191068	-0.191068	0	-0.191068	-0.191068	0	0	0	0	0	0	0	0	0	0	0	0	0	0	0
PTEN	20	0	0	0	0	0	0	0	0	0	0	0	0	0	0	0	0	0	0	-0.143071	-0.143071	-0.143071	0	0	0	0	0	0	-0.143071	-0.143071	-0.143071	0	-0.143071	-0.143071	0	0	0	0	-0.143071	0	-0.143071	0	-0.143071	0	-0.143071	0	0	0	0
RELN	20	0	0	0	0	0	0	0	0	0	0	0	0	0	0	0	0	0	0	0	0	0	0	0	0	0	0	0	-0.333656	-0.333656	-0.333656	-0.333656	-0.333656	-0.333656	-0.333656	0	0	0	0	0	-0.333656	-0.333656	-0.333656	-0.333656	0	0	0	0	0
SHANK3	18	0	0	0	0	0	0	0	0	0	0	0	0	0	0	0	0	0	0	0	0	0	0	0	0	0	0	0	-0.120603	-0.120603	-0.120603	-0.120603	-0.120603	-0.120603	0	0	0	0	0	0	0	-0.120603	-0.120603	-0.120603	0	0	0	0	0
SHANK1	11	0	0	0	0	0	0	0	0	0	0	0	0	0	0	0	0	0	0	0	0	0	0	0	0	0	0	0	-0.151333	0	-0.151333	-0.151333	0	-0.151333	0	0	0	0	0	0	0	-0.151333	-0.151333	0	0	0	0	0	0
GSK3B	10	0	0	0	0	0	0	0	0	0	0	0	0	0	0	0	0	0	0	0	0	0	0	0	0	0	0	0	0	0	0	0	-0.091245	-0.091245	0	0	0	0	0	0	0	0	0	0	-0.091245	0	0	0	0
DLG4	11	0	0	0	0	0	0	0	0	0	0	0	0	0	0	0	0	0	0	0	0	0	0	0	0	0	0	0	-0.100999	0	0	0	0	0	0	0	0	0	0	0	0	-0.100999	-0.100999	0	-0.100999	0	0	0	0
NETO1	9	0	0	0	0	0	0	0	0	0	0	0	0	0	0	0	0	0	0	0	0	0	0	0	0	0	0	0	0	0	0	0	0	0	0	0	0	0	0	0	0	-0.162564	-0.162564	0	0	0	0	0	0
PTK2B	8	0	0	0	0	0	0	0	0	0	0	0	0	0	0	0	0	0	0	0	0	0	0	0	0	0	0	0	0	0	0	0	0	0	0	0	0	0	0	0	0	0	0	-0.156633	0	0	0	0	0
RAPSN	5	0	0	0	0	0	0	0	0	0	0	0	0	0	0	0	0	0	0	0	0	0	0	0	0	0	0	0	0	0	0	0	0	0	0	0	0	0	0	0	0	0	0	0	-0.195472	0	0	0	0
MAPK1	6	0	0	0	0	0	0	0	0	0	0	0	0	0	0	0	0	0	0	0	0	0	0	0	0	0	0	0	0	0	0	0	0	0	0	0	0	0	0	0	0	0	0	0	-0.220343	0	0	0	0
ARF1	8	0	0	0	0	0	0	0	0	0	0	0	0	0	0	0	0	0	0	0	0	0	0	0	0	0	0	0	0	0	-0.223693	-0.223693	0	-0.223693	0	0	0	0	0	0	0	0	0	0	0	0	-0.223693	-0.223693	0
KCNB1	5	0	0	0	0	0	0	0	0	0	0	0	0	0	0	0	0	0	0	0	0	0	0	0	0	0	0	0	0	0	0	0	0	0	0	0	0	0	0	0	0	0	0	0	0	0	-0.178926	-0.178926	0
NFATC4	6	0	0	0	0	0	0	0	0	0	0	0	0	0	0	0	0	0	0	0	0	0	0	0	0	0	0	0	0	0	0	0	-0.111163	-0.111163	0	0	0	0	0	0	0	0	0	0	0	0	0	0	0
LZTS1	5	0	0	0	0	0	0	0	0	0	0	0	0	0	0	0	0	0	0	0	0	0	0	0	0	0	0	0	0	0	0	0	-0.176859	-0.176859	0	0	0	0	0	0	0	0	0	0	0	0	0	0	0
YWHAH	5	0	0	0	0	0	0	0	0	0	0	0	0	0	0	0	0	0	0	0	0	0	0	0	0	0	0	0	0	0	0	0	-0.2312	-0.2312	0	0	0	0	0	0	0	0	0	0	0	0	0	0	0
SIPA1L1	7	0	0	0	0	0	0	0	0	0	0	0	0	0	0	0	0	0	0	0	0	0	0	0	0	0	0	0	0	-0.143853	-0.143853	0	-0.143853	-0.143853	0	0	0	0	0	0	0	0	0	0	0	0	0	0	0
ITPKA	9	0	0	0	0	0	0	0	0	0	0	0	0	0	0	0	0	0	0	0	0	0	0	0	0	0	0	0	0	-0.11372	-0.11372	-0.11372	-0.11372	-0.11372	-0.11372	0	0	0	0	0	0	0	0	0	0	0	0	0	0
BAIAP2	10	0	0	0	0	0	0	0	0	0	0	0	0	0	0	0	0	0	0	0	0	0	0	0	0	0	0	0	-0.208161	-0.208161	-0.208161	-0.208161	-0.208161	-0.208161	-0.208161	0	0	0	0	0	0	0	0	0	0	0	0	0	0
CAMK2B	11	0	0	0	0	0	0	0	0	0	0	0	0	0	0	0	0	0	0	0	0	0	0	0	0	0	0	0	0	-0.145869	-0.145869	-0.145869	-0.145869	-0.145869	-0.145869	0	0	0	0	0	0	0	0	0	0	0	0	0	0
DBN1	5	0	0	0	0	0	0	0	0	0	0	0	0	0	0	0	0	0	0	0	0	0	0	0	0	0	0	0	0	0	0	0	0	-0.143567	0	0	0	0	0	0	0	0	0	0	0	0	0	0	0
BCAN	4	0	0	0	0	0	0	0	0	0	0	0	0	0	0	0	0	0	0	0	0	0	0	0	0	0	0	0	0	0	0	0	0	0	0	0	0	0	0	0	0	0	0	0	0	0	0	0	0
NCDN	4	0	0	0	0	0	0	0	0	0	0	0	0	0	0	0	0	0	0	0	0	0	0	0	0	0	0	0	0	0	0	0	0	0	0	0	0	0	0	0	0	0	0	0	0	0	0	0	0
SHISA9	4	0	0	0	0	0	0	0	0	0	0	0	0	0	0	0	0	0	0	0	0	0	0	0	0	0	0	0	0	0	0	0	0	0	0	0	0	0	0	0	0	0	0	0	0	0	0	0	0
SHISA7	4	0	0	0	0	0	0	0	0	0	0	0	0	0	0	0	0	0	0	0	0	0	0	0	0	0	0	0	0	0	0	0	0	0	0	0	0	0	0	0	0	0	0	0	0	0	0	0	0
VGF	4	0	0	0	0	0	0	0	0	0	0	0	0	0	0	0	0	0	0	0	0	0	0	0	0	0	0	0	0	0	0	0	0	0	0	0	0	0	0	0	0	0	0	0	0	0	0	0	0
FGF14	4	0	0	0	0	0	0	0	0	0	0	0	0	0	0	0	0	0	0	0	0	0	0	0	0	0	0	0	0	0	0	0	0	0	0	0	0	0	0	0	0	0	0	0	0	0	0	0	0
YWHAG	3	0	0	0	0	0	0	0	0	0	0	0	0	0	0	0	0	0	0	0	0	0	0	0	0	0	0	0	0	0	0	0	0	0	0	0	0	0	0	0	0	0	0	0	0	0	0	0	0
NCAM1	3	0	0	0	0	0	0	0	0	0	0	0	0	0	0	0	0	0	0	0	0	0	0	0	0	0	0	0	0	0	0	0	0	0	0	0	0	0	0	0	0	0	0	0	0	0	0	0	0
BRAF	12	0	0	0	0	0	0	0	0	0	0	0	0	0	0	0	0	0	0	0	0	0	0	0	0	0	0	0	0	0	0	0	0	0	0	0	0	0	0	0	0	-0.269658	-0.269658	0	0	0	0	-0.269658	-0.269658
NTRK2	17	-0.181625	0	0	0	0	0	0	0	0	0	0	0	0	0	0	0	0	0	0	0	0	-0.181625	0	0	0	0	0	0	0	0	0	0	-0.181625	0	0	0	0	0	0	0	-0.181625	-0.181625	-0.181625	0	0	0	0	-0.181625
PLK2	8	0	0	0	0	0	0	0	0	0	0	0	0	0	0	0	0	0	0	0	0	0	0	0	0	0	0	0	0	0	-0.196922	0	0	-0.196922	0	0	0	0	0	0	0	0	-0.196922	0	0	0	0	0	0
CPEB3	7	0	0	0	0	0	0	0	0	0	0	0	0	0	0	0	0	0	0	0	0	0	0	0	0	0	0	0	0	0	-0.128168	-0.128168	0	-0.128168	0	0	0	0	0	0	0	0	-0.128168	0	0	0	0	0	0
NR2E1	10	0	0	0	0	0	0	0	0	0	0	0	0	0	0	0	0	0	0	0	0	0	0	0	0	0	0	0	0	0	0	0	-0.126991	-0.126991	0	0	0	0	0	-0.126991	-0.126991	0	-0.126991	0	0	0	0	0	0
NEUROD2	8	0	0	0	0	0	0	0	0	0	0	0	0	0	0	0	0	0	0	0	0	0	0	0	0	0	0	0	0	0	0	0	0	0	0	0	0	0	0	-0.120392	-0.120392	-0.120392	-0.120392	0	0	0	0	0	0
NOS1	7	0	0	0	0	0	0	0	0	0	0	0	0	0	0	0	0	0	0	0	0	0	0	0	0	0	0	0	0	0	0	0	0	0	0	0	0	0	0	0	-0.121158	0	-0.121158	0	0	0	0	0	0
CRH	12	0	0	0	0	0	0	0	0	0	0	0	0	0	0	0	0	0	0	0	0	0	0	0	-0.141797	0	0	0	0	0	0	0	0	0	0	0	-0.141797	0	-0.141797	0	-0.141797	-0.141797	-0.141797	0	-0.141797	0	0	0	0
DRD2	15	0	0	0	0	0	0	0	0	0	0	0	0	0	0	0	0	0	0	0	0	0	-0.106524	0	-0.106524	0	0	0	0	0	0	0	0	0	0	0	0	0	-0.106524	0	0	-0.106524	-0.106524	-0.106524	-0.106524	0	0	0	0
DRD1	16	0	0	0	0	0	0	0	0	0	0	0	0	0	0	0	0	0	0	-0.089428	-0.089428	-0.089428	0	0	0	0	0	0	0	0	0	0	0	0	0	0	0	0	-0.089428	-0.089428	-0.089428	-0.089428	-0.089428	0	-0.089428	0	0	0	0
GRIK2	12	0	0	0	0	0	0	0	0	0	0	0	0	0	0	0	0	0	0	0	0	0	0	0	0	0	0	0	0	0	0	0	0	0	0	0	0	-0.311079	-0.311079	-0.311079	-0.311079	0	-0.311079	-0.311079	-0.311079	0	0	0	0
GRM5	9	0	0	0	0	0	0	0	0	0	0	0	0	0	0	0	0	0	-0.254373	0	0	0	0	0	0	0	0	0	0	0	0	0	0	0	0	0	0	0	0	0	0	-0.254373	-0.254373	-0.254373	-0.254373	0	0	0	0
STAR	4	0	0	0	0	0	0	0	0	0	0	0	0	0	0	0	0	0	0	0	0	0	0	0	0	0	0	0	0	0	0	0	0	0	0	0	0	0	0	0	0	0	-0.088347	0	0	0	0	0	0
PTPN5	5	0	0	0	0	0	0	0	0	0	0	0	0	0	0	0	0	0	0	0	0	0	0	0	0	0	0	0	0	0	0	0	0	0	0	0	-0.12078	0	0	0	0	0	-0.12078	0	0	0	0	0	0
GRIA1	5	0	0	0	0	0	0	0	0	0	0	0	0	0	0	0	0	0	0	0	0	0	0	0	0	0	0	0	0	0	0	0	0	0	0	0	0	0	0	0	0	0	-0.228722	0	-0.228722	0	0	0	0
CALB1	4	0	0	0	0	0	0	0	0	0	0	0	0	0	0	0	0	0	0	0	0	0	0	0	0	0	0	0	0	0	0	0	0	0	0	0	0	0	0	0	0	0	-0.250824	0	0	0	0	0	0
ARC	8	0	0	0	0	0	0	0	0	0	0	0	0	0	0	0	0	0	0	0	0	0	0	0	0	0	0	0	0	0	0	0	0	0	0	0	0	0	0	0	0	-0.174165	-0.174165	0	0	0	0	0	0
SLC8A2	8	0	0	0	0	0	0	0	0	0	0	0	0	0	0	0	0	0	0	0	0	0	0	0	0	0	0	0	0	0	0	0	0	0	0	0	0	0	0	0	0	-0.234781	-0.234781	0	0	0	0	0	0
NPTN	8	0	0	0	0	0	0	0	0	0	0	0	0	0	0	0	0	0	0	0	0	0	0	0	0	0	0	0	0	0	0	0	0	0	0	0	0	0	0	0	0	-0.166546	-0.166546	0	0	0	0	0	0
PTN	8	0	0	0	0	0	0	0	0	0	0	0	0	0	0	0	0	0	0	0	0	0	0	0	0	0	0	0	0	0	0	0	0	0	0	0	0	0	0	0	0	-0.147247	-0.147247	0	0	0	0	0	0
SHANK2	7	0	0	0	0	0	0	0	0	0	0	0	0	0	0	0	0	0	0	0	0	0	0	0	0	0	0	0	0	0	0	0	0	0	0	0	0	0	0	0	0	-0.323041	-0.323041	0	0	0	0	0	0
RGS14	7	0	0	0	0	0	0	0	0	0	0	0	0	0	0	0	0	0	0	0	0	0	0	0	0	0	0	0	0	0	0	0	0	0	0	0	0	0	0	0	0	-0.145799	-0.145799	0	0	0	0	0	0
SORCS3	6	0	0	0	0	0	0	0	0	0	0	0	0	0	0	0	0	0	0	0	0	0	0	-0.221602	0	0	0	0	0	0	0	0	0	0	0	0	0	0	0	0	0	-0.221602	-0.221602	0	0	0	0	0	0
EIF2AK4	5	0	0	0	0	0	0	0	0	0	0	0	0	0	0	0	0	0	0	0	0	0	0	0	0	0	0	0	0	0	0	0	0	0	0	0	0	0	0	0	0	-0.245088	-0.245088	0	0	0	0	0	0
JPH4	5	0	0	0	0	0	0	0	0	0	0	0	0	0	0	0	0	0	0	0	0	0	0	0	0	0	0	0	0	0	0	0	0	0	0	0	0	0	0	0	0	-0.25645	-0.25645	0	0	0	0	0	0
SRF	5	0	0	0	0	0	0	0	0	0	0	0	0	0	0	0	0	0	0	0	0	0	0	0	0	0	0	0	0	0	0	0	0	0	0	0	0	0	0	0	0	-0.08993	-0.08993	0	0	0	0	0	0
RIN1	5	0	0	0	0	0	0	0	0	0	0	0	0	0	0	0	0	0	0	0	0	0	0	0	0	0	0	0	0	0	0	0	0	0	0	0	0	0	0	0	0	-0.212659	-0.212659	0	0	0	0	0	0
PPP3CB	5	0	0	0	0	0	0	0	0	0	0	0	0	0	0	0	0	0	0	0	0	0	0	0	0	0	0	0	0	0	0	0	0	0	0	0	0	0	0	0	0	-0.136945	-0.136945	0	0	0	0	0	0
HRH1	5	0	0	0	0	0	0	0	0	0	0	0	0	0	0	0	0	0	0	0	0	0	0	0	0	0	0	0	0	0	0	0	0	0	0	0	0	0	0	0	0	-0.322651	-0.322651	0	0	0	0	0	0
JPH3	7	0	0	0	0	0	0	0	0	0	0	0	0	0	0	0	0	0	0	0	0	0	0	0	0	0	0	0	0	0	0	0	0	0	0	0	-0.138444	0	0	0	0	-0.138444	-0.138444	0	0	0	0	0	0
SYNGAP1	7	0	0	0	0	0	0	0	0	0	0	0	0	0	0	0	0	0	0	0	0	0	0	0	0	0	0	0	-0.192592	0	0	0	0	0	0	0	0	0	0	0	0	-0.192592	-0.192592	0	0	0	0	0	0
KRAS	6	0	0	0	0	0	0	0	0	0	0	0	0	0	0	0	0	0	0	0	0	0	0	0	0	0	0	0	0	0	0	0	0	0	0	0	0	0	0	0	0	-0.114856	-0.114856	0	0	0	0	0	0
TRH	3	0	0	0	0	0	0	0	0	0	0	0	0	0	0	0	0	0	0	0	0	0	-0.292409	0	-0.292409	0	0	0	0	0	0	0	0	0	0	0	0	0	0	0	0	0	-0.292409	0	0	0	0	0	0
P2RY1	2	0	0	0	0	0	0	0	0	0	0	0	0	0	0	0	0	0	0	0	0	0	-0.206128	0	-0.206128	0	0	0	0	0	0	0	0	0	0	0	0	0	0	0	0	0	0	0	0	0	0	0	0
ADRA2C	1	0	0	0	0	0	0	0	0	0	0	0	0	0	0	0	0	0	0	0	0	0	0	0	-0.162522	0	0	0	0	0	0	0	0	0	0	0	0	0	0	0	0	0	0	0	0	0	0	0	0
ADRA2A	1	0	0	0	0	0	0	0	0	0	0	0	0	0	0	0	0	0	0	0	0	0	0	0	-0.112472	0	0	0	0	0	0	0	0	0	0	0	0	0	0	0	0	0	0	0	0	0	0	0	0
GABBR1	2	0	0	0	0	0	0	0	0	0	0	0	0	0	0	0	0	0	0	0	0	0	0	0	-0.10441	0	0	0	0	0	0	0	0	0	0	0	0	0	0	0	0	0	0	0	0	0	0	0	0
PRLHR	2	0	0	0	0	0	0	0	0	0	0	0	0	0	0	0	0	0	0	0	0	0	-0.268381	-0.268381	0	0	0	0	0	0	0	0	0	0	0	0	0	0	0	0	0	0	0	0	0	0	0	0	0
NPY1R	2	0	0	0	0	0	0	0	0	0	0	0	0	0	0	0	0	0	0	0	0	0	-0.258742	-0.258742	0	0	0	0	0	0	0	0	0	0	0	0	0	0	0	0	0	0	0	0	0	0	0	0	0
ECEL1	1	0	0	0	0	0	0	0	0	0	0	0	0	0	0	0	0	0	0	0	0	0	0	-0.128858	0	0	0	0	0	0	0	0	0	0	0	0	0	0	0	0	0	0	0	0	0	0	0	0	0
CPE	1	0	0	0	0	0	0	0	0	0	0	0	0	0	0	0	0	0	0	0	0	0	0	-0.258657	0	0	0	0	0	0	0	0	0	0	0	0	0	0	0	0	0	0	0	0	0	0	0	0	0
SORCS1	1	0	0	0	0	0	0	0	0	0	0	0	0	0	0	0	0	0	0	0	0	0	0	-0.145689	0	0	0	0	0	0	0	0	0	0	0	0	0	0	0	0	0	0	0	0	0	0	0	0	0
PCSK1N	1	0	0	0	0	0	0	0	0	0	0	0	0	0	0	0	0	0	0	0	0	0	0	-0.226225	0	0	0	0	0	0	0	0	0	0	0	0	0	0	0	0	0	0	0	0	0	0	0	0	0
TAC3	1	0	0	0	0	0	0	0	0	0	0	0	0	0	0	0	0	0	0	0	0	0	0	-0.2441	0	0	0	0	0	0	0	0	0	0	0	0	0	0	0	0	0	0	0	0	0	0	0	0	0
PDYN	2	0	0	0	0	0	0	0	0	0	0	0	0	0	0	0	0	0	0	0	0	0	0	-0.241426	0	0	0	0	0	0	0	0	0	0	0	0	0	0	0	0	0	0	0	0	-0.241426	0	0	0	0
NPFFR2	2	0	0	0	0	0	0	0	0	0	0	0	0	0	0	0	0	0	0	0	0	0	0	-0.326585	0	0	0	0	0	0	0	0	0	0	0	0	0	0	0	0	0	0	0	0	-0.326585	0	0	0	0
SSTR1	2	0	0	0	0	0	0	0	0	0	0	0	0	0	0	0	0	0	0	0	0	0	0	-0.175984	0	0	0	0	0	0	0	0	0	0	0	0	0	0	0	0	0	0	0	0	-0.175984	0	0	0	0
SSTR2	2	0	0	0	0	0	0	0	0	0	0	0	0	0	0	0	0	0	0	0	0	0	0	-0.239729	0	0	0	0	0	0	0	0	0	0	0	0	0	0	0	0	0	0	0	0	-0.239729	0	0	0	0
NPY5R	5	0	0	0	0	0	0	0	0	0	0	0	0	0	0	0	0	0	0	0	0	0	-0.216193	-0.216193	-0.216193	0	0	0	0	0	0	0	0	0	0	0	0	0	0	0	0	0	0	0	-0.216193	0	0	0	0
NPY	4	0	0	0	0	0	0	0	0	0	0	0	0	0	0	0	0	0	0	0	0	0	-0.207016	-0.207016	0	0	0	0	0	0	0	0	0	0	0	0	0	0	0	0	0	0	-0.207016	0	-0.207016	0	0	0	0
OPRM1	5	0	0	0	0	0	0	0	0	0	0	0	0	0	0	0	0	0	0	0	0	0	-0.200032	-0.200032	0	0	0	0	0	0	0	0	0	0	0	0	0	0	0	0	0	0	-0.200032	0	-0.200032	0	0	0	0
HCRTR1	3	0	0	0	0	0	0	0	0	0	0	0	0	0	0	0	0	0	0	0	0	0	-0.160887	-0.160887	0	0	0	0	0	0	0	0	0	0	0	0	0	0	0	0	0	0	0	0	-0.160887	0	0	0	0
OPRL1	3	0	0	0	0	0	0	0	0	0	0	0	0	0	0	0	0	0	0	0	0	0	-0.18203	-0.18203	0	0	0	0	0	0	0	0	0	0	0	0	0	0	0	0	0	0	0	0	-0.18203	0	0	0	0
BBS12	3	0	0	0	0	-0.27345	0	-0.27345	0	0	0	0	0	0	0	0	0	0	0	0	0	0	-0.27345	0	0	0	0	0	0	0	0	0	0	0	0	0	0	0	0	0	0	0	0	0	0	0	0	0	0
GLS	2	0	0	0	0	0	0	0	0	0	0	0	0	0	0	0	0	0	0	0	0	0	-0.144726	0	0	0	0	0	0	0	0	0	0	0	0	0	0	0	0	0	0	0	0	0	-0.144726	0	0	0	0
ATP8A2	1	0	0	0	0	0	0	0	0	0	0	0	0	0	0	0	0	0	0	0	0	0	-0.112118	0	0	0	0	0	0	0	0	0	0	0	0	0	0	0	0	0	0	0	0	0	0	0	0	0	0
HAND2	1	0	0	0	0	0	0	0	0	0	0	0	0	0	0	0	0	0	0	0	0	0	-0.111996	0	0	0	0	0	0	0	0	0	0	0	0	0	0	0	0	0	0	0	0	0	0	0	0	0	0
MRAP2	1	0	0	0	0	0	0	0	0	0	0	0	0	0	0	0	0	0	0	0	0	0	-0.132977	0	0	0	0	0	0	0	0	0	0	0	0	0	0	0	0	0	0	0	0	0	0	0	0	0	0
CCKBR	1	0	0	0	0	0	0	0	0	0	0	0	0	0	0	0	0	0	0	0	0	0	-0.163296	0	0	0	0	0	0	0	0	0	0	0	0	0	0	0	0	0	0	0	0	0	0	0	0	0	0
NEGR1	1	0	0	0	0	0	0	0	0	0	0	0	0	0	0	0	0	0	0	0	0	0	-0.225944	0	0	0	0	0	0	0	0	0	0	0	0	0	0	0	0	0	0	0	0	0	0	0	0	0	0
STRA6	3	0	0	0	0	0	0	0	0	0	0	0	0	0	0	0	0	0	0	0	0	0	-0.214894	0	0	0	0	0	0	0	0	0	0	0	0	0	0	0	0	0	0	-0.214894	-0.214894	0	0	0	0	0	0
ASIP	2	0	0	0	0	0	0	0	0	0	0	0	0	0	0	0	0	0	0	0	0	0	-0.112274	0	0	0	0	0	0	0	0	0	0	0	0	0	0	0	0	0	0	0	-0.112274	0	0	0	0	0	0
UCHL1	2	0	0	0	0	0	0	0	0	0	0	0	0	0	0	0	0	0	0	0	0	0	-0.109982	0	0	0	0	0	0	0	0	0	0	0	0	0	0	0	0	0	0	0	-0.109982	0	0	0	0	0	0
OPRK1	6	0	0	0	0	0	0	0	0	0	0	0	0	0	0	0	0	0	0	0	-0.289737	0	-0.289737	-0.289737	0	0	0	0	0	0	0	0	0	0	0	0	0	0	0	0	0	-0.289737	-0.289737	0	-0.289737	0	0	0	0
RIMS4	2	0	0	0	0	0	0	0	0	0	0	0	0	0	0	0	0	0	0	0	0	0	0	0	0	0	0	0	0	0	0	0	0	0	0	0	0	0	0	0	0	0	0	0	0	0	0	0	-0.080935
BTBD9	3	0	0	0	0	0	0	0	0	0	0	0	0	0	0	0	0	0	0	0	0	0	0	0	0	0	0	0	0	0	0	0	0	0	0	-0.139893	0	0	0	0	0	0	-0.139893	0	0	0	0	0	0
SNAP91	2	0	0	0	0	0	0	0	0	0	0	0	0	0	0	0	0	0	0	0	0	0	0	0	0	0	0	0	0	0	0	0	0	0	0	-0.180934	0	0	0	0	0	0	0	0	-0.180934	0	0	0	0
AAK1	1	0	0	0	0	0	0	0	0	0	0	0	0	0	0	0	0	0	0	0	0	0	0	0	0	0	0	0	0	0	0	0	0	0	0	-0.127278	0	0	0	0	0	0	0	0	0	0	0	0	0
PIK3CB	1	0	0	0	0	0	0	0	0	0	0	0	0	0	0	0	0	0	0	0	0	0	0	0	0	0	0	0	0	0	0	0	0	0	0	-0.230923	0	0	0	0	0	0	0	0	0	0	0	0	0
UBQLN2	1	0	0	0	0	0	0	0	0	0	0	0	0	0	0	0	0	0	0	0	0	0	0	0	0	0	0	0	0	0	0	0	0	0	0	-0.299505	0	0	0	0	0	0	0	0	0	0	0	0	0
SMAP1	1	0	0	0	0	0	0	0	0	0	0	0	0	0	0	0	0	0	0	0	0	0	0	0	0	0	0	0	0	0	0	0	0	0	0	-0.151168	0	0	0	0	0	0	0	0	0	0	0	0	0
WASL	1	0	0	0	0	0	0	0	0	0	0	0	0	0	0	0	0	0	0	0	0	0	0	0	0	0	0	0	0	0	0	0	0	0	0	-0.274748	0	0	0	0	0	0	0	0	0	0	0	0	0
SCYL2	1	0	0	0	0	0	0	0	0	0	0	0	0	0	0	0	0	0	0	0	0	0	0	0	0	0	0	0	0	0	0	0	0	0	0	-0.14965	0	0	0	0	0	0	0	0	0	0	0	0	0
PLCB1	4	0	0	0	0	0	0	0	0	0	0	0	0	0	0	0	0	0	0	0	0	0	0	0	0	0	0	0	0	0	0	0	0	0	0	0	0	0	0	0	0	0	-0.192811	0	-0.192811	0	-0.192811	-0.192811	0
CDK5R2	2	0	0	0	0	0	0	0	0	0	0	0	0	0	0	0	0	0	0	0	0	0	0	0	0	0	0	0	0	0	0	0	0	0	0	0	0	0	0	0	0	0	0	0	0	0	-0.173883	-0.173883	0
PLB1	2	0	0	0	0	0	0	0	0	0	0	0	0	0	0	0	0	0	0	0	0	0	0	0	0	0	0	0	0	0	0	0	0	0	0	0	0	0	0	0	0	0	0	0	0	0	-0.136872	-0.136872	0
CACNA1H	2	0	0	0	0	0	0	0	0	0	0	0	0	0	0	0	0	0	0	0	0	0	0	0	0	0	0	0	0	0	0	0	0	0	0	0	0	0	0	0	0	0	0	0	0	0	-0.147991	-0.147991	0
POMZP3	2	0	0	0	0	0	0	0	0	0	0	0	0	0	0	0	0	0	0	0	0	0	0	0	0	0	0	0	0	0	0	0	0	0	0	0	0	0	0	0	0	0	0	0	0	0	-0.317435	-0.317435	0
ARF4	3	0	0	0	0	0	0	0	0	0	0	0	0	0	0	0	0	0	0	0	0	0	0	0	0	0	0	0	-0.103887	0	0	0	0	0	0	0	0	0	0	0	0	-0.103887	-0.103887	0	0	0	0	0	0
FYN	4	0	0	0	0	0	0	0	0	0	0	0	0	0	0	0	0	0	0	0	0	0	-0.136453	0	0	0	0	0	-0.136453	0	0	0	0	0	0	0	0	0	0	0	0	-0.136453	-0.136453	0	0	0	0	0	0
HPRT1	2	0	0	0	0	0	0	0	0	0	0	0	0	0	0	0	0	0	0	0	0	0	0	0	0	0	0	0	-0.23603	0	0	0	0	0	0	0	0	0	0	0	0	0	-0.23603	0	0	0	0	0	0
KLHL1	2	0	0	0	0	0	0	0	0	0	0	0	0	0	0	0	0	0	0	0	0	0	0	0	0	0	0	0	-0.112657	0	0	0	0	0	0	0	0	0	0	0	0	0	-0.112657	0	0	0	0	0	0
CHL1	2	0	0	0	0	0	0	0	0	0	0	0	0	0	0	0	0	0	0	0	0	0	0	0	0	0	0	0	0	0	0	0	0	0	0	0	-0.222953	0	0	0	0	0	-0.222953	0	0	0	0	0	0
SLC4A10	2	0	0	0	0	0	0	0	0	0	0	0	0	0	0	0	0	0	0	0	0	0	0	0	0	0	0	0	0	0	0	0	0	0	0	0	-0.284648	0	0	0	0	0	-0.284648	0	0	0	0	0	0
ITGA3	2	0	0	0	0	0	0	0	0	0	0	0	0	0	0	0	0	0	0	0	0	0	0	0	0	0	0	0	0	0	0	0	0	0	0	0	-0.236884	0	0	0	0	0	-0.236884	0	0	0	0	0	0
LSAMP	2	0	0	0	0	0	0	0	0	0	0	0	0	0	0	0	0	0	0	0	0	0	0	0	0	0	0	0	0	0	0	0	0	0	0	0	-0.231249	0	0	0	0	0	-0.231249	0	0	0	0	0	0
PRKAR1B	1	0	0	0	0	0	0	0	0	0	0	0	0	0	0	0	0	0	0	0	0	0	0	0	0	0	0	0	0	0	0	0	0	0	0	0	0	0	0	0	0	0	-0.111324	0	0	0	0	0	0
MBD5	1	0	0	0	0	0	0	0	0	0	0	0	0	0	0	0	0	0	0	0	0	0	0	0	0	0	0	0	0	0	0	0	0	0	0	0	0	0	0	0	0	0	-0.215239	0	0	0	0	0	0
RNF180	1	0	0	0	0	0	0	0	0	0	0	0	0	0	0	0	0	0	0	0	0	0	0	0	0	0	0	0	0	0	0	0	0	0	0	0	0	0	0	0	0	0	-0.137322	0	0	0	0	0	0
MAFG	1	0	0	0	0	0	0	0	0	0	0	0	0	0	0	0	0	0	0	0	0	0	0	0	0	0	0	0	0	0	0	0	0	0	0	0	0	0	0	0	0	0	-0.138631	0	0	0	0	0	0
LHX8	1	0	0	0	0	0	0	0	0	0	0	0	0	0	0	0	0	0	0	0	0	0	0	0	0	0	0	0	0	0	0	0	0	0	0	0	0	0	0	0	0	0	-0.13487	0	0	0	0	0	0
ITGA5	1	0	0	0	0	0	0	0	0	0	0	0	0	0	0	0	0	0	0	0	0	0	0	0	0	0	0	0	0	0	0	0	0	0	0	0	0	0	0	0	0	0	-0.094688	0	0	0	0	0	0
CEBPB	1	0	0	0	0	0	0	0	0	0	0	0	0	0	0	0	0	0	0	0	0	0	0	0	0	0	0	0	0	0	0	0	0	0	0	0	0	0	0	0	0	0	-0.092753	0	0	0	0	0	0
SPTBN4	1	0	0	0	0	0	0	0	0	0	0	0	0	0	0	0	0	0	0	0	0	0	0	0	0	0	0	0	0	0	0	0	0	0	0	0	0	0	0	0	0	0	-0.195717	0	0	0	0	0	0
SPTBN2	1	0	0	0	0	0	0	0	0	0	0	0	0	0	0	0	0	0	0	0	0	0	0	0	0	0	0	0	0	0	0	0	0	0	0	0	0	0	0	0	0	0	-0.12101	0	0	0	0	0	0
PUM1	1	0	0	0	0	0	0	0	0	0	0	0	0	0	0	0	0	0	0	0	0	0	0	0	0	0	0	0	0	0	0	0	0	0	0	0	0	0	0	0	0	0	-0.252935	0	0	0	0	0	0
CAMK4	1	0	0	0	0	0	0	0	0	0	0	0	0	0	0	0	0	0	0	0	0	0	0	0	0	0	0	0	0	0	0	0	0	0	0	0	0	0	0	0	0	0	-0.178198	0	0	0	0	0	0
FOXA2	1	0	0	0	0	0	0	0	0	0	0	0	0	0	0	0	0	0	0	0	0	0	0	0	0	0	0	0	0	0	0	0	0	0	0	0	0	0	0	0	0	0	-0.091843	0	0	0	0	0	0
EFNB3	1	0	0	0	0	0	0	0	0	0	0	0	0	0	0	0	0	0	0	0	0	0	0	0	0	0	0	0	0	0	0	0	0	0	0	0	0	0	0	0	0	0	-0.351286	0	0	0	0	0	0
NPHP1	1	0	0	0	0	0	0	0	0	0	0	0	0	0	0	0	0	0	0	0	0	0	0	0	0	0	0	0	0	0	0	0	0	0	0	0	0	0	0	0	0	0	-0.258337	0	0	0	0	0	0
AUTS2	1	0	0	0	0	0	0	0	0	0	0	0	0	0	0	0	0	0	0	0	0	0	0	0	0	0	0	0	0	0	0	0	0	0	0	0	0	0	0	0	0	0	-0.139266	0	0	0	0	0	0
NR4A3	1	0	0	0	0	0	0	0	0	0	0	0	0	0	0	0	0	0	0	0	0	0	0	0	0	0	0	0	0	0	0	0	0	0	0	0	0	0	0	0	0	0	-0.302543	0	0	0	0	0	0
DYNLRB1	1	0	0	0	0	0	0	0	0	0	0	0	0	0	0	0	0	0	0	0	0	0	0	0	0	0	0	0	0	0	0	0	0	0	0	0	0	0	0	0	0	0	-0.29675	0	0	0	0	0	0
AFF2	1	0	0	0	0	0	0	0	0	0	0	0	0	0	0	0	0	0	0	0	0	0	0	0	0	0	0	0	0	0	0	0	0	0	0	0	0	0	0	0	0	0	-0.134463	0	0	0	0	0	0
PJA2	1	0	0	0	0	0	0	0	0	0	0	0	0	0	0	0	0	0	0	0	0	0	0	0	0	0	0	0	0	0	0	0	0	0	0	0	0	0	0	0	0	0	-0.209834	0	0	0	0	0	0
ATAD1	4	0	0	0	0	0	0	0	0	0	0	0	0	0	0	0	0	0	0	0	0	0	0	0	0	0	0	0	0	0	0	0	0	0	0	0	0	0	0	0	0	-0.211014	-0.211014	-0.211014	0	0	0	0	0
NLGN4Y	3	0	0	0	0	0	0	0	0	0	0	0	0	0	0	0	0	0	0	0	0	0	0	0	0	0	0	0	0	0	0	0	0	0	0	0	0	0	0	0	0	-0.186006	-0.186006	0	0	0	0	0	0
NLGN4X	4	0	0	0	0	0	0	0	0	0	0	0	0	0	0	0	0	0	0	0	0	0	0	0	0	0	0	0	0	0	0	0	0	0	0	0	0	0	0	0	0	-0.167639	-0.167639	0	0	0	0	0	0
PDE1B	3	0	0	0	0	0	0	0	0	0	0	0	0	0	0	0	0	0	0	0	0	0	0	0	0	0	0	0	0	0	0	0	0	0	0	0	0	0	0	0	0	-0.147377	-0.147377	0	0	0	0	0	0
PRKAR2B	2	0	0	0	0	0	0	0	0	0	0	0	0	0	0	0	0	0	0	0	0	0	0	0	0	0	0	0	0	0	0	0	0	0	0	0	0	0	0	0	0	-0.306586	-0.306586	0	0	0	0	0	0
HTT	2	0	0	0	0	0	0	0	0	0	0	0	0	0	0	0	0	0	0	0	0	0	0	0	0	0	0	0	0	0	0	0	0	0	0	0	0	0	0	0	0	-0.09811	-0.09811	0	0	0	0	0	0
FOXB1	2	0	0	0	0	0	0	0	0	0	0	0	0	0	0	0	0	0	0	0	0	0	0	0	0	0	0	0	0	0	0	0	0	0	0	0	0	0	0	0	0	-0.103525	-0.103525	0	0	0	0	0	0
FGF13	2	0	0	0	0	0	0	0	0	0	0	0	0	0	0	0	0	0	0	0	0	0	0	0	0	0	0	0	0	0	0	0	0	0	0	0	0	0	0	0	0	-0.218063	-0.218063	0	0	0	0	0	0
HMGCR	2	0	0	0	0	0	0	0	0	0	0	0	0	0	0	0	0	0	0	0	0	0	0	0	0	0	0	0	0	0	0	0	0	0	0	0	0	0	0	0	0	-0.248432	-0.248432	0	0	0	0	0	0
PRKCG	4	0	0	0	0	0	0	0	0	0	0	0	0	0	0	0	0	0	0	0	0	0	0	0	0	0	0	-0.286195	0	0	0	0	0	0	0	0	0	0	0	0	-0.286195	0	-0.286195	0	-0.286195	0	0	0	0
ADCYAP1R1	1	0	0	0	0	0	0	0	0	0	0	0	0	0	0	0	0	0	0	0	0	0	0	0	0	0	0	0	0	0	0	0	0	0	0	0	0	0	0	0	-0.204269	0	0	0	0	0	0	0	0
LRP11	1	0	0	0	0	0	0	0	0	0	0	0	0	0	0	0	0	0	0	0	0	0	0	0	0	0	0	0	0	0	0	0	0	0	0	0	0	0	0	0	-0.220822	0	0	0	0	0	0	0	0
SCN9A	2	0	0	0	0	0	0	0	0	0	0	0	0	0	0	0	0	0	0	0	0	0	0	0	0	0	0	0	0	0	0	0	0	0	0	0	0	0	0	0	-0.376872	0	-0.376872	0	0	0	0	0	0
NR4A2	2	0	0	0	0	0	0	0	0	0	0	0	0	0	0	0	0	0	0	0	0	0	0	0	0	0	0	0	0	0	0	0	0	0	0	0	0	0	0	0	-0.089312	0	-0.089312	0	0	0	0	0	0
THBS1	2	0	0	0	0	0	0	0	0	0	0	0	0	0	0	0	0	0	0	0	0	0	0	0	0	0	0	0	0	0	0	0	0	0	0	0	0	0	0	0	-0.129972	0	-0.129972	0	0	0	0	0	0
PENK	6	0	0	0	0	0	0	0	0	0	0	0	0	0	0	0	0	0	0	0	0	0	0	-0.17547	0	0	0	0	0	0	0	0	0	0	0	0	-0.17547	0	0	-0.17547	-0.17547	0	-0.17547	0	-0.17547	0	0	0	0
HTR1A	4	0	0	0	0	0	0	0	0	0	0	0	0	0	0	0	0	0	0	0	0	0	0	0	0	0	0	0	0	0	0	0	0	0	0	0	-0.17357	0	0	-0.17357	-0.17357	0	-0.17357	0	0	0	0	0	0
MDK	3	0	0	0	0	0	0	0	0	0	0	0	0	0	0	0	0	0	0	0	0	0	0	0	0	0	0	0	0	0	0	0	0	0	0	0	0	0	0	-0.097004	-0.097004	0	-0.097004	0	0	0	0	0	0
FBXL20	3	0	0	0	0	0	0	0	0	0	0	0	0	0	0	0	0	0	0	0	0	0	0	0	0	0	0	0	0	0	0	0	0	0	0	0	0	0	0	-0.092938	-0.092938	0	-0.092938	0	0	0	0	0	0
ADRB1	2	0	0	0	0	0	0	0	0	0	0	0	0	0	0	0	0	0	0	0	0	0	0	0	0	0	0	0	0	0	0	0	0	0	0	0	0	0	0	-0.09651	-0.09651	0	0	0	0	0	0	0	0
GABRA5	6	0	0	0	0	0	0	0	0	0	0	0	0	0	0	0	0	0	0	0	0	0	0	0	0	0	0	-0.302052	0	0	0	0	0	0	0	0	0	0	0	-0.302052	-0.302052	-0.302052	-0.302052	0	-0.302052	0	0	0	0
VDAC1	6	0	0	0	0	0	0	0	0	0	0	0	0	0	0	0	0	0	0	0	0	0	0	0	0	0	0	0	0	0	0	0	0	0	0	0	0	0	-0.20471	-0.20471	-0.20471	-0.20471	-0.20471	0	-0.20471	0	0	0	0
DEAF1	4	0	0	0	0	0	0	0	0	0	0	0	0	0	0	0	0	0	0	0	0	0	0	0	0	0	0	0	0	0	0	0	0	0	0	0	0	0	0	-0.13056	-0.13056	-0.13056	-0.13056	0	0	0	0	0	0
HTR2C	5	0	0	0	0	0	0	0	0	0	0	0	0	0	0	0	0	0	0	0	0	0	-0.229449	0	0	0	0	0	0	0	0	0	0	0	0	0	0	0	0	-0.229449	-0.229449	0	-0.229449	0	-0.229449	0	0	0	0
CCK	5	0	0	0	0	0	0	0	0	0	0	0	0	0	0	0	0	0	-0.254716	0	0	0	-0.254716	0	0	0	0	0	0	0	0	0	0	0	0	0	0	0	0	-0.254716	-0.254716	0	-0.254716	0	0	0	0	0	0
DLGAP2	2	0	0	0	0	0	0	0	0	0	0	0	0	0	0	0	0	0	0	0	0	0	0	0	0	0	0	0	0	0	0	0	0	0	0	0	0	0	-0.175485	0	0	0	0	0	-0.175485	0	0	0	0
GLRA2	3	0	0	0	0	0	0	0	0	0	0	0	0	0	0	0	0	0	0	0	0	0	0	-0.240679	0	0	0	0	0	0	0	0	0	0	0	0	0	0	-0.240679	0	0	0	0	0	-0.240679	0	0	0	0
GLRA3	3	0	0	0	0	0	0	0	0	0	0	0	0	0	0	0	0	0	0	0	0	0	0	-0.31274	0	0	0	0	0	0	0	0	0	0	0	0	0	0	-0.31274	0	0	0	0	0	-0.31274	0	0	0	0
SLC17A7	6	0	0	0	0	0	0	0	0	0	0	0	0	0	0	0	0	0	0	0	0	0	0	0	0	0	0	0	0	0	0	0	0	0	0	0	0	-0.142667	-0.142667	0	0	0	-0.142667	0	-0.142667	0	0	0	0
CACNB4	4	0	0	0	0	0	0	0	0	0	0	0	0	0	0	0	0	0	0	0	0	0	0	0	0	0	0	0	0	0	0	0	0	0	0	0	0	-0.170803	-0.170803	0	0	0	-0.170803	0	-0.170803	0	0	0	0
SHC3	4	0	0	0	0	0	0	0	0	0	0	0	0	0	0	0	0	0	0	0	0	0	0	0	0	0	0	0	0	0	0	0	0	0	0	0	0	-0.199919	-0.199919	0	0	0	-0.199919	0	-0.199919	0	0	0	0
GABRG2	3	0	0	0	0	0	0	0	0	0	0	0	0	0	0	0	0	0	0	0	0	0	0	0	0	0	0	0	0	0	0	0	0	0	0	0	0	0	-0.196816	0	0	0	-0.196816	0	-0.196816	0	0	0	0
TMOD2	3	0	0	0	0	0	0	0	0	0	0	0	0	0	0	0	0	0	0	0	0	0	0	0	0	0	0	0	0	0	0	0	0	0	0	0	0	0	-0.199905	0	0	0	-0.199905	0	-0.199905	0	0	0	0
GRID2	3	0	0	0	0	0	0	0	0	0	0	0	0	0	0	0	0	0	0	0	0	0	0	0	0	0	0	0	0	0	0	0	0	0	0	0	0	-0.186929	-0.186929	0	0	0	0	0	-0.186929	0	0	0	0
SLC1A4	3	0	0	0	0	0	0	0	0	0	0	0	0	0	0	0	0	0	0	0	0	0	0	0	0	0	0	0	0	0	0	0	0	0	0	0	0	-0.322468	-0.322468	0	0	0	0	0	-0.322468	0	0	0	0
GPR52	4	0	0	0	0	0	0	0	0	0	0	0	0	0	0	0	0	0	0	0	0	0	0	0	0	0	0	0	0	0	0	0	0	0	0	0	0	0	-0.09955	0	0	-0.09955	-0.09955	0	-0.09955	0	0	0	0
NPTX2	3	0	0	0	0	0	0	0	0	0	0	0	0	0	0	0	0	0	0	0	0	0	0	0	0	0	0	0	0	0	0	0	0	0	0	0	0	0	0	0	0	-0.139608	-0.139608	0	-0.139608	0	0	0	0
SLC12A5	4	0	0	0	0	0	0	0	0	0	0	0	0	0	0	0	0	0	0	0	0	0	0	0	0	0	0	0	-0.127092	0	0	0	0	0	0	0	0	0	0	0	0	-0.127092	-0.127092	0	-0.127092	0	0	0	0
SEZ6	3	0	0	0	0	0	0	0	0	0	0	0	0	0	0	0	0	0	0	0	0	0	0	0	0	0	0	0	0	0	0	0	0	-0.124782	0	0	0	0	0	0	0	0	-0.124782	0	-0.124782	0	0	0	0
GALR3	2	0	0	0	0	0	0	0	0	0	0	0	0	0	0	0	0	0	0	0	0	0	0	0	0	0	0	0	0	0	0	0	0	0	0	0	0	0	0	0	0	0	-0.088663	0	-0.088663	0	0	0	0
HOMER1	2	0	0	0	0	0	0	0	0	0	0	0	0	0	0	0	0	0	0	0	0	0	0	0	0	0	0	0	0	0	0	0	0	0	0	0	0	0	0	0	0	0	-0.131048	0	-0.131048	0	0	0	0
GRIN2B	2	0	0	0	0	0	0	0	0	0	0	0	0	0	0	0	0	0	0	0	0	0	0	0	0	0	0	0	0	0	0	0	0	0	0	0	0	0	0	0	0	0	-0.184983	0	-0.184983	0	0	0	0
KCND2	2	0	0	0	0	0	0	0	0	0	0	0	0	0	0	0	0	0	0	0	0	0	0	0	0	0	0	0	0	0	0	0	0	0	0	0	0	0	0	0	0	0	-0.159041	0	-0.159041	0	0	0	0
CHRNA7	2	0	0	0	0	0	0	0	0	0	0	0	0	0	0	0	0	0	0	0	0	0	0	0	0	0	0	0	0	0	0	0	0	0	0	0	0	0	0	0	0	0	-0.111563	0	-0.111563	0	0	0	0
FGF12	2	0	0	0	0	0	0	0	0	0	0	0	0	0	0	0	0	0	0	0	0	0	0	0	0	0	0	0	0	0	0	0	0	0	0	0	0	0	0	0	0	0	-0.088105	0	-0.088105	0	0	0	0
GABRB3	2	0	0	0	0	0	0	0	0	0	0	0	0	0	0	0	0	0	0	0	0	0	0	0	0	0	0	-0.274123	0	0	0	0	0	0	0	0	0	0	0	0	0	0	0	0	-0.274123	0	0	0	0
NPTX1	2	0	0	0	0	0	0	0	0	0	0	0	0	0	0	0	0	0	0	0	0	0	0	0	0	0	0	-0.220832	0	0	0	0	0	0	0	0	0	0	0	0	0	0	0	0	-0.220832	0	0	0	0
HTR4	1	0	0	0	0	0	0	0	0	0	0	0	0	0	0	0	0	0	0	0	0	0	0	0	0	0	0	0	0	0	0	0	0	0	0	0	0	0	0	0	0	0	0	0	-0.153753	0	0	0	0
GPR176	1	0	0	0	0	0	0	0	0	0	0	0	0	0	0	0	0	0	0	0	0	0	0	0	0	0	0	0	0	0	0	0	0	0	0	0	0	0	0	0	0	0	0	0	-0.2571	0	0	0	0
HTR7	1	0	0	0	0	0	0	0	0	0	0	0	0	0	0	0	0	0	0	0	0	0	0	0	0	0	0	0	0	0	0	0	0	0	0	0	0	0	0	0	0	0	0	0	-0.088084	0	0	0	0
UNC13C	1	0	0	0	0	0	0	0	0	0	0	0	0	0	0	0	0	0	0	0	0	0	0	0	0	0	0	0	0	0	0	0	0	0	0	0	0	0	0	0	0	0	0	0	-0.292855	0	0	0	0
GABRG1	1	0	0	0	0	0	0	0	0	0	0	0	0	0	0	0	0	0	0	0	0	0	0	0	0	0	0	0	0	0	0	0	0	0	0	0	0	0	0	0	0	0	0	0	-0.222576	0	0	0	0
PCDHB5	1	0	0	0	0	0	0	0	0	0	0	0	0	0	0	0	0	0	0	0	0	0	0	0	0	0	0	0	0	0	0	0	0	0	0	0	0	0	0	0	0	0	0	0	-0.14413	0	0	0	0
DLGAP1	1	0	0	0	0	0	0	0	0	0	0	0	0	0	0	0	0	0	0	0	0	0	0	0	0	0	0	0	0	0	0	0	0	0	0	0	0	0	0	0	0	0	0	0	-0.119493	0	0	0	0
RIC3	1	0	0	0	0	0	0	0	0	0	0	0	0	0	0	0	0	0	0	0	0	0	0	0	0	0	0	0	0	0	0	0	0	0	0	0	0	0	0	0	0	0	0	0	-0.129893	0	0	0	0
GABRA4	1	0	0	0	0	0	0	0	0	0	0	0	0	0	0	0	0	0	0	0	0	0	0	0	0	0	0	0	0	0	0	0	0	0	0	0	0	0	0	0	0	0	0	0	-0.19361	0	0	0	0
GABRA3	1	0	0	0	0	0	0	0	0	0	0	0	0	0	0	0	0	0	0	0	0	0	0	0	0	0	0	0	0	0	0	0	0	0	0	0	0	0	0	0	0	0	0	0	-0.209025	0	0	0	0
CHRM2	1	0	0	0	0	0	0	0	0	0	0	0	0	0	0	0	0	0	0	0	0	0	0	0	0	0	0	0	0	0	0	0	0	0	0	0	0	0	0	0	0	0	0	0	-0.089489	0	0	0	0
CHRM3	1	0	0	0	0	0	0	0	0	0	0	0	0	0	0	0	0	0	0	0	0	0	0	0	0	0	0	0	0	0	0	0	0	0	0	0	0	0	0	0	0	0	0	0	-0.116665	0	0	0	0
CACNB1	1	0	0	0	0	0	0	0	0	0	0	0	0	0	0	0	0	0	0	0	0	0	0	0	0	0	0	0	0	0	0	0	0	0	0	0	0	0	0	0	0	0	0	0	-0.186509	0	0	0	0
CACNB2	1	0	0	0	0	0	0	0	0	0	0	0	0	0	0	0	0	0	0	0	0	0	0	0	0	0	0	0	0	0	0	0	0	0	0	0	0	0	0	0	0	0	0	0	-0.168219	0	0	0	0
CACNB3	1	0	0	0	0	0	0	0	0	0	0	0	0	0	0	0	0	0	0	0	0	0	0	0	0	0	0	0	0	0	0	0	0	0	0	0	0	0	0	0	0	0	0	0	-0.275981	0	0	0	0
GRIA2	1	0	0	0	0	0	0	0	0	0	0	0	0	0	0	0	0	0	0	0	0	0	0	0	0	0	0	0	0	0	0	0	0	0	0	0	0	0	0	0	0	0	0	0	-0.279874	0	0	0	0
MBP	1	0	0	0	0	0	0	0	0	0	0	0	0	0	0	0	0	0	0	0	0	0	0	0	0	0	0	0	0	0	0	0	0	0	0	0	0	0	0	0	0	0	0	0	-0.237417	0	0	0	0
GRIA3	1	0	0	0	0	0	0	0	0	0	0	0	0	0	0	0	0	0	0	0	0	0	0	0	0	0	0	0	0	0	0	0	0	0	0	0	0	0	0	0	0	0	0	0	-0.112281	0	0	0	0
HTR1F	1	0	0	0	0	0	0	0	0	0	0	0	0	0	0	0	0	0	0	0	0	0	0	0	0	0	0	0	0	0	0	0	0	0	0	0	0	0	0	0	0	0	0	0	-0.104647	0	0	0	0
LRFN5	1	0	0	0	0	0	0	0	0	0	0	0	0	0	0	0	0	0	0	0	0	0	0	0	0	0	0	0	0	0	0	0	0	0	0	0	0	0	0	0	0	0	0	0	-0.278371	0	0	0	0
LRFN4	1	0	0	0	0	0	0	0	0	0	0	0	0	0	0	0	0	0	0	0	0	0	0	0	0	0	0	0	0	0	0	0	0	0	0	0	0	0	0	0	0	0	0	0	-0.203713	0	0	0	0
KCNIP2	1	0	0	0	0	0	0	0	0	0	0	0	0	0	0	0	0	0	0	0	0	0	0	0	0	0	0	0	0	0	0	0	0	0	0	0	0	0	0	0	0	0	0	0	-0.108302	0	0	0	0
PCDH8	1	0	0	0	0	0	0	0	0	0	0	0	0	0	0	0	0	0	0	0	0	0	0	0	0	0	0	0	0	0	0	0	0	0	0	0	0	0	0	0	0	0	0	0	-0.369195	0	0	0	0
SST	1	0	0	0	0	0	0	0	0	0	0	0	0	0	0	0	0	0	0	0	0	0	0	0	0	0	0	0	0	0	0	0	0	0	0	0	0	0	0	0	0	0	0	0	-0.17902	0	0	0	0
VIPR1	1	0	0	0	0	0	0	0	0	0	0	0	0	0	0	0	0	0	0	0	0	0	0	0	0	0	0	0	0	0	0	0	0	0	0	0	0	0	0	0	0	0	0	0	-0.138101	0	0	0	0
CPNE6	1	0	0	0	0	0	0	0	0	0	0	0	0	0	0	0	0	0	0	0	0	0	0	0	0	0	0	0	0	0	0	0	0	0	0	0	0	0	0	0	0	0	0	0	-0.185507	0	0	0	0
BSN	1	0	0	0	0	0	0	0	0	0	0	0	0	0	0	0	0	0	0	0	0	0	0	0	0	0	0	0	0	0	0	0	0	0	0	0	0	0	0	0	0	0	0	0	-0.150495	0	0	0	0
KCNQ5	1	0	0	0	0	0	0	0	0	0	0	0	0	0	0	0	0	0	0	0	0	0	0	0	0	0	0	0	0	0	0	0	0	0	0	0	0	0	0	0	0	0	0	0	-0.197966	0	0	0	0
EGR3	1	0	0	0	0	0	0	0	0	0	0	0	0	0	0	0	0	0	0	0	0	0	0	0	0	0	0	0	0	0	0	0	0	0	0	0	0	0	0	0	0	0	0	0	-0.151058	0	0	0	0
DTNA	1	0	0	0	0	0	0	0	0	0	0	0	0	0	0	0	0	0	0	0	0	0	0	0	0	0	0	0	0	0	0	0	0	0	0	0	0	0	0	0	0	0	0	0	-0.163928	0	0	0	0
CX3CL1	1	0	0	0	0	0	0	0	0	0	0	0	0	0	0	0	0	0	0	0	0	0	0	0	0	0	0	0	0	0	0	0	0	0	0	0	0	0	0	0	0	0	0	0	-0.146216	0	0	0	0
PTPRF	1	0	0	0	0	0	0	0	0	0	0	0	0	0	0	0	0	0	0	0	0	0	0	0	0	0	0	0	0	0	0	0	0	0	0	0	0	0	0	0	0	0	0	0	-0.261649	0	0	0	0
GABRD	1	0	0	0	0	0	0	0	0	0	0	0	0	0	0	0	0	0	0	0	0	0	0	0	0	0	0	0	0	0	0	0	0	0	0	0	0	0	0	0	0	0	0	0	-0.137218	0	0	0	0
PCDHB14	1	0	0	0	0	0	0	0	0	0	0	0	0	0	0	0	0	0	0	0	0	0	0	0	0	0	0	0	0	0	0	0	0	0	0	0	0	0	0	0	0	0	0	0	-0.130962	0	0	0	0
PCDHB11	1	0	0	0	0	0	0	0	0	0	0	0	0	0	0	0	0	0	0	0	0	0	0	0	0	0	0	0	0	0	0	0	0	0	0	0	0	0	0	0	0	0	0	0	-0.105038	0	0	0	0
RIT2	1	0	0	0	0	0	0	0	0	0	0	0	0	0	0	0	0	0	0	0	0	0	0	0	0	0	0	0	0	0	0	0	0	0	0	0	0	0	0	0	0	0	0	0	-0.316209	0	0	0	0
SLC1A1	1	0	0	0	0	0	0	0	0	0	0	0	0	0	0	0	0	0	0	0	0	0	0	0	0	0	0	0	0	0	0	0	0	0	0	0	0	0	0	0	0	0	0	0	-0.134917	0	0	0	0
SLC1A6	1	0	0	0	0	0	0	0	0	0	0	0	0	0	0	0	0	0	0	0	0	0	0	0	0	0	0	0	0	0	0	0	0	0	0	0	0	0	0	0	0	0	0	0	-0.222197	0	0	0	0
CACNA1E	1	0	0	0	0	0	0	0	0	0	0	0	0	0	0	0	0	0	0	0	0	0	0	0	0	0	0	0	0	0	0	0	0	0	0	0	0	0	0	0	0	0	0	0	-0.206813	0	0	0	0
DLG3	1	0	0	0	0	0	0	0	0	0	0	0	0	0	0	0	0	0	0	0	0	0	0	0	0	0	0	0	0	0	0	0	0	0	0	0	0	0	0	0	0	0	0	0	-0.210194	0	0	0	0
GNB1	1	0	0	0	0	0	0	0	0	0	0	0	0	0	0	0	0	0	0	0	0	0	0	0	0	0	0	0	0	0	0	0	0	0	0	0	0	0	0	0	0	0	0	0	-0.097805	0	0	0	0
FLOT2	1	0	0	0	0	0	0	0	0	0	0	0	0	0	0	0	0	0	0	0	0	0	0	0	0	0	0	0	0	0	0	0	0	0	0	0	0	0	0	0	0	0	0	0	-0.16354	0	0	0	0
SSTR3	1	0	0	0	0	0	0	0	0	0	0	0	0	0	0	0	0	0	0	0	0	0	0	0	0	0	0	0	0	0	0	0	0	0	0	0	0	0	0	0	0	0	0	0	-0.141664	0	0	0	0
CORT	1	0	0	0	0	0	0	0	0	0	0	0	0	0	0	0	0	0	0	0	0	0	0	0	0	0	0	0	0	0	0	0	0	0	0	0	0	0	0	0	0	0	0	0	-0.120341	0	0	0	0
USP14	1	0	0	0	0	0	0	0	0	0	0	0	0	0	0	0	0	0	0	0	0	0	0	0	0	0	0	0	0	0	0	0	0	0	0	0	0	0	0	0	0	0	0	0	-0.252087	0	0	0	0
PDE7B	1	0	0	0	0	0	0	0	0	0	0	0	0	0	0	0	0	0	0	0	0	0	0	0	0	0	0	0	0	0	0	0	0	0	0	0	0	0	0	0	0	0	0	0	-0.132118	0	0	0	0
SMPD3	1	0	0	0	0	0	0	0	0	0	0	0	0	0	0	0	0	0	0	0	0	0	0	0	0	0	0	0	0	0	0	0	0	0	0	0	0	0	0	0	0	0	0	0	0	0	0	0	0
RAPGEF4	1	0	0	0	0	0	0	0	0	0	0	0	0	0	0	0	0	0	0	0	0	0	0	0	0	0	0	0	0	0	0	0	0	0	0	0	0	0	0	0	0	0	0	0	0	0	0	0	0
SNX19	1	0	0	0	0	0	0	0	0	0	0	0	0	0	0	0	0	0	0	0	0	0	0	0	0	0	0	0	0	0	0	0	0	0	0	0	0	0	0	0	0	0	0	0	0	0	0	0	0
EXOC3L1	1	0	0	0	0	0	0	0	0	0	0	0	0	0	0	0	0	0	0	0	0	0	0	0	0	0	0	0	0	0	0	0	0	0	0	0	0	0	0	0	0	0	0	0	0	0	0	0	0
ILDR2	1	0	0	0	0	0	0	0	0	0	0	0	0	0	0	0	0	0	0	0	0	0	0	0	0	0	0	0	0	0	0	0	0	0	0	0	0	0	0	0	0	0	0	0	0	0	0	0	0
RAB11FIP2	1	0	0	0	0	0	0	0	0	0	0	0	0	0	0	0	0	0	0	0	0	0	0	0	0	0	0	0	0	0	0	0	0	0	0	0	0	0	0	0	0	0	0	0	0	0	0	0	0
PTPRN	1	0	0	0	0	0	0	0	0	0	0	0	0	0	0	0	0	0	0	0	0	0	0	0	0	0	0	0	0	0	0	0	0	0	0	0	0	0	0	0	0	0	0	0	0	0	0	0	0
FKBP1B	1	0	0	0	0	0	0	0	0	0	0	0	0	0	0	0	0	0	0	0	0	0	0	0	0	0	0	0	0	0	0	0	0	0	0	0	0	0	0	0	0	0	0	0	0	0	0	0	0
LTBP4	1	0	0	0	0	0	0	0	0	0	0	0	0	0	0	0	0	0	0	0	0	0	0	0	0	0	0	0	0	0	0	0	0	0	0	0	0	0	0	0	0	0	0	0	0	0	0	0	0
VIP	2	0	0	0	0	0	0	0	0	0	0	0	0	0	0	0	0	0	0	0	0	0	0	0	0	0	0	0	0	0	0	0	0	0	0	0	0	0	0	0	0	0	-0.300363	0	0	0	0	0	0
ISL1	2	0	0	0	0	0	0	0	0	0	0	0	0	0	0	0	0	0	0	0	0	0	0	0	0	-0.240409	0	-0.240409	0	0	0	0	0	0	0	0	0	0	0	0	0	0	0	0	0	0	0	0	0
SULF1	1	0	0	0	0	0	0	0	0	0	0	0	0	0	0	0	0	0	0	0	0	0	0	0	0	0	0	-0.179509	0	0	0	0	0	0	0	0	0	0	0	0	0	0	0	0	0	0	0	0	0
COL25A1	1	0	0	0	0	0	0	0	0	0	0	0	0	0	0	0	0	0	0	0	0	0	0	0	0	0	0	-0.147169	0	0	0	0	0	0	0	0	0	0	0	0	0	0	0	0	0	0	0	0	0
RNF165	2	0	0	0	0	0	0	0	0	0	0	0	0	0	0	0	0	0	0	0	0	0	0	0	0	0	-0.304209	-0.304209	0	0	0	0	0	0	0	0	0	0	0	0	0	0	0	0	0	0	0	0	0
SEMA3A	3	0	0	0	0	0	0	0	0	0	0	0	0	0	0	0	0	0	0	0	0	0	0	0	0	0	-0.211977	-0.211977	-0.211977	0	0	0	0	0	0	0	0	0	0	0	0	0	0	0	0	0	0	0	0
NRP1	4	0	0	0	0	0	0	0	0	0	0	0	0	0	0	0	0	0	0	0	0	0	0	0	0	-0.19922	-0.19922	-0.19922	-0.19922	0	0	0	0	0	0	0	0	0	0	0	0	0	0	0	0	0	0	0	0
SEMA4F	1	0	0	0	0	0	0	0	0	0	0	0	0	0	0	0	0	0	0	0	0	0	0	0	0	-0.272375	0	0	0	0	0	0	0	0	0	0	0	0	0	0	0	0	0	0	0	0	0	0	0
NRCAM	1	0	0	0	0	0	0	0	0	0	0	0	0	0	0	0	0	0	0	0	0	0	0	0	0	-0.130135	0	0	0	0	0	0	0	0	0	0	0	0	0	0	0	0	0	0	0	0	0	0	0
BMPR1B	1	0	0	0	0	0	0	0	0	0	0	0	0	0	0	0	0	0	0	0	0	0	0	0	0	-0.196855	0	0	0	0	0	0	0	0	0	0	0	0	0	0	0	0	0	0	0	0	0	0	0
SLIT1	5	0	0	0	0	0	0	0	0	0	0	0	0	0	0	0	0	0	0	0	0	0	0	0	0	-0.300603	-0.300603	0	0	0	0	0	0	0	0	0	0	0	0	0	0	0	0	0	0	0	0	0	0
CHN1	1	0	0	0	0	0	0	0	0	0	0	0	0	0	0	0	0	0	0	0	0	0	0	0	0	0	-0.162543	0	0	0	0	0	0	0	0	0	0	0	0	0	0	0	0	0	0	0	0	0	0
PLXNC1	1	0	0	0	0	0	0	0	0	0	0	0	0	0	0	0	0	0	0	0	0	0	0	0	0	0	-0.392095	0	0	0	0	0	0	0	0	0	0	0	0	0	0	0	0	0	0	0	0	0	0
PLXNA2	1	0	0	0	0	0	0	0	0	0	0	0	0	0	0	0	0	0	0	0	0	0	0	0	0	0	-0.149924	0	0	0	0	0	0	0	0	0	0	0	0	0	0	0	0	0	0	0	0	0	0
PLXNA1	1	0	0	0	0	0	0	0	0	0	0	0	0	0	0	0	0	0	0	0	0	0	0	0	0	0	-0.189576	0	0	0	0	0	0	0	0	0	0	0	0	0	0	0	0	0	0	0	0	0	0
PLXNA4	1	0	0	0	0	0	0	0	0	0	0	0	0	0	0	0	0	0	0	0	0	0	0	0	0	0	-0.202113	0	0	0	0	0	0	0	0	0	0	0	0	0	0	0	0	0	0	0	0	0	0
PLXNA3	1	0	0	0	0	0	0	0	0	0	0	0	0	0	0	0	0	0	0	0	0	0	0	0	0	0	-0.244318	0	0	0	0	0	0	0	0	0	0	0	0	0	0	0	0	0	0	0	0	0	0
SLIT2	2	0	0	0	0	0	0	0	0	0	0	0	0	0	0	0	0	0	0	0	0	0	0	0	0	-0.26581	-0.26581	0	0	0	0	0	0	0	0	0	0	0	0	0	0	0	0	0	0	0	0	0	0
PARD3	1	0	0	0	0	0	0	0	0	0	0	0	0	0	0	0	0	0	-0.181555	0	0	0	0	0	0	0	0	0	0	0	0	0	0	0	0	0	0	0	0	0	0	0	0	0	0	0	0	0	0
DGKB	1	0	0	0	0	0	0	0	0	0	0	0	0	0	0	0	0	0	-0.182837	0	0	0	0	0	0	0	0	0	0	0	0	0	0	0	0	0	0	0	0	0	0	0	0	0	0	0	0	0	0
DGKA	1	0	0	0	0	0	0	0	0	0	0	0	0	0	0	0	0	0	-0.288065	0	0	0	0	0	0	0	0	0	0	0	0	0	0	0	0	0	0	0	0	0	0	0	0	0	0	0	0	0	0
DGKH	1	0	0	0	0	0	0	0	0	0	0	0	0	0	0	0	0	0	-0.182353	0	0	0	0	0	0	0	0	0	0	0	0	0	0	0	0	0	0	0	0	0	0	0	0	0	0	0	0	0	0
LRP1	1	0	0	0	0	0	0	0	0	0	0	0	0	0	0	0	0	0	-0.191794	0	0	0	0	0	0	0	0	0	0	0	0	0	0	0	0	0	0	0	0	0	0	0	0	0	0	0	0	0	0
GAP43	1	0	0	0	0	0	0	0	0	0	0	0	0	0	0	0	0	0	-0.209839	0	0	0	0	0	0	0	0	0	0	0	0	0	0	0	0	0	0	0	0	0	0	0	0	0	0	0	0	0	0
NBN	1	0	0	0	0	0	0	0	0	0	-0.331034	0	0	0	0	0	0	0	0	0	0	0	0	0	0	0	0	0	0	0	0	0	0	0	0	0	0	0	0	0	0	0	0	0	0	0	0	0	0
TERF2IP	1	0	0	0	0	0	0	0	0	0	-0.396635	0	0	0	0	0	0	0	0	0	0	0	0	0	0	0	0	0	0	0	0	0	0	0	0	0	0	0	0	0	0	0	0	0	0	0	0	0	0
TERT	1	0	0	0	0	0	0	0	0	-0.145125	0	0	0	0	0	0	0	0	0	0	0	0	0	0	0	0	0	0	0	0	0	0	0	0	0	0	0	0	0	0	0	0	0	0	0	0	0	0	0
PYGO1	1	0	0	0	0	0	0	0	0	-0.209524	0	0	0	0	0	0	0	0	0	0	0	0	0	0	0	0	0	0	0	0	0	0	0	0	0	0	0	0	0	0	0	0	0	0	0	0	0	0	0
PYGO2	1	0	0	0	0	0	0	0	0	-0.172972	0	0	0	0	0	0	0	0	0	0	0	0	0	0	0	0	0	0	0	0	0	0	0	0	0	0	0	0	0	0	0	0	0	0	0	0	0	0	0
RBBP5	1	0	0	0	0	0	0	0	0	-0.120995	0	0	0	0	0	0	0	0	0	0	0	0	0	0	0	0	0	0	0	0	0	0	0	0	0	0	0	0	0	0	0	0	0	0	0	0	0	0	0
BCL9L	1	0	0	0	0	0	0	0	0	-0.131147	0	0	0	0	0	0	0	0	0	0	0	0	0	0	0	0	0	0	0	0	0	0	0	0	0	0	0	0	0	0	0	0	0	0	0	0	0	0	0
AXIN2	1	0	0	0	0	0	0	0	0	-0.157706	0	0	0	0	0	0	0	0	0	0	0	0	0	0	0	0	0	0	0	0	0	0	0	0	0	0	0	0	0	0	0	0	0	0	0	0	0	0	0
ANP32E	1	0	0	0	0	0	0	0	0	0	0	0	0	0	0	0	0	-0.150365	0	0	0	0	0	0	0	0	0	0	0	0	0	0	0	0	0	0	0	0	0	0	0	0	0	0	0	0	0	0	0
CHD5	1	0	0	0	0	0	0	0	0	0	0	0	0	0	0	0	0	-0.133263	0	0	0	0	0	0	0	0	0	0	0	0	0	0	0	0	0	0	0	0	0	0	0	0	0	0	0	0	0	0	0
CENPV	1	0	0	0	0	0	0	0	0	0	0	0	0	0	0	0	-0.150439	0	0	0	0	0	0	0	0	0	0	0	0	0	0	0	0	0	0	0	0	0	0	0	0	0	0	0	0	0	0	0	0
RUVBL1	3	0	0	0	0	0	0	0	0	-0.219576	0	0	0	0	0	0	-0.219576	-0.219576	0	0	0	0	0	0	0	0	0	0	0	0	0	0	0	0	0	0	0	0	0	0	0	0	0	0	0	0	0	0	0
CENPT	2	0	0	0	0	0	0	0	0	0	0	0	0	0	0	0	-0.119213	-0.119213	0	0	0	0	0	0	0	0	0	0	0	0	0	0	0	0	0	0	0	0	0	0	0	0	0	0	0	0	0	0	0
CENPW	2	0	0	0	0	0	0	0	0	0	0	0	0	0	0	0	-0.117304	-0.117304	0	0	0	0	0	0	0	0	0	0	0	0	0	0	0	0	0	0	0	0	0	0	0	0	0	0	0	0	0	0	0
CENPK	2	0	0	0	0	0	0	0	0	0	0	0	0	0	0	0	-0.126718	-0.126718	0	0	0	0	0	0	0	0	0	0	0	0	0	0	0	0	0	0	0	0	0	0	0	0	0	0	0	0	0	0	0
CENPM	2	0	0	0	0	0	0	0	0	0	0	0	0	0	0	0	-0.139309	-0.139309	0	0	0	0	0	0	0	0	0	0	0	0	0	0	0	0	0	0	0	0	0	0	0	0	0	0	0	0	0	0	0
CENPO	2	0	0	0	0	0	0	0	0	0	0	0	0	0	0	0	-0.236026	-0.236026	0	0	0	0	0	0	0	0	0	0	0	0	0	0	0	0	0	0	0	0	0	0	0	0	0	0	0	0	0	0	0
RSF1	2	0	0	0	0	0	0	0	0	0	0	0	0	0	0	0	-0.127178	-0.127178	0	0	0	0	0	0	0	0	0	0	0	0	0	0	0	0	0	0	0	0	0	0	0	0	0	0	0	0	0	0	0
MIS18BP1	2	0	0	0	0	0	0	0	0	0	0	0	0	0	0	0	-0.143581	-0.143581	0	0	0	0	0	0	0	0	0	0	0	0	0	0	0	0	0	0	0	0	0	0	0	0	0	0	0	0	0	0	0
HIST1H4L	5	0	0	0	0	0	0	0	0	-0.170488	0	-0.170488	0	-0.170488	0	0	-0.170488	-0.170488	0	0	0	0	0	0	0	0	0	0	0	0	0	0	0	0	0	0	0	0	0	0	0	0	0	0	0	0	0	0	0
HIST1H4K	9	0	0	0	0	0	0	0	0	-0.206996	-0.206996	-0.206996	-0.206996	-0.206996	-0.206996	-0.206996	-0.206996	-0.206996	0	0	0	0	0	0	0	0	0	0	0	0	0	0	0	0	0	0	0	0	0	0	0	0	0	0	0	0	0	0	0
HIST1H4B	9	0	0	0	0	0	0	0	0	-0.241541	-0.241541	-0.241541	-0.241541	-0.241541	-0.241541	-0.241541	-0.241541	-0.241541	0	0	0	0	0	0	0	0	0	0	0	0	0	0	0	0	0	0	0	0	0	0	0	0	0	0	0	0	0	0	0
HIST1H4H	9	0	0	0	0	0	0	0	0	-0.25052	-0.25052	-0.25052	-0.25052	-0.25052	-0.25052	-0.25052	-0.25052	-0.25052	0	0	0	0	0	0	0	0	0	0	0	0	0	0	0	0	0	0	0	0	0	0	0	0	0	0	0	0	0	0	0
HIST1H4I	9	0	0	0	0	0	0	0	0	-0.264042	-0.264042	-0.264042	-0.264042	-0.264042	-0.264042	-0.264042	-0.264042	-0.264042	0	0	0	0	0	0	0	0	0	0	0	0	0	0	0	0	0	0	0	0	0	0	0	0	0	0	0	0	0	0	0
HIST1H4J	9	0	0	0	0	0	0	0	0	-0.236498	-0.236498	-0.236498	-0.236498	-0.236498	-0.236498	-0.236498	-0.236498	-0.236498	0	0	0	0	0	0	0	0	0	0	0	0	0	0	0	0	0	0	0	0	0	0	0	0	0	0	0	0	0	0	0
HIST1H4C	9	0	0	0	0	0	0	0	0	-0.211412	-0.211412	-0.211412	-0.211412	-0.211412	-0.211412	-0.211412	-0.211412	-0.211412	0	0	0	0	0	0	0	0	0	0	0	0	0	0	0	0	0	0	0	0	0	0	0	0	0	0	0	0	0	0	0
HIST1H4D	9	0	0	0	0	0	0	0	0	-0.325282	-0.325282	-0.325282	-0.325282	-0.325282	-0.325282	-0.325282	-0.325282	-0.325282	0	0	0	0	0	0	0	0	0	0	0	0	0	0	0	0	0	0	0	0	0	0	0	0	0	0	0	0	0	0	0
HIST1H4E	9	0	0	0	0	0	0	0	0	-0.273916	-0.273916	-0.273916	-0.273916	-0.273916	-0.273916	-0.273916	-0.273916	-0.273916	0	0	0	0	0	0	0	0	0	0	0	0	0	0	0	0	0	0	0	0	0	0	0	0	0	0	0	0	0	0	0
HIST4H4	9	0	0	0	0	0	0	0	0	-0.233198	-0.233198	-0.233198	-0.233198	-0.233198	-0.233198	-0.233198	-0.233198	-0.233198	0	0	0	0	0	0	0	0	0	0	0	0	0	0	0	0	0	0	0	0	0	0	0	0	0	0	0	0	0	0	0
CHAF1B	1	0	0	0	0	0	0	0	0	0	0	0	0	0	-0.234501	0	0	0	0	0	0	0	0	0	0	0	0	0	0	0	0	0	0	0	0	0	0	0	0	0	0	0	0	0	0	0	0	0	0
HIST1H3F	3	0	0	0	0	0	0	0	0	0	0	0	0	-0.22101	-0.22101	-0.22101	0	0	0	0	0	0	0	0	0	0	0	0	0	0	0	0	0	0	0	0	0	0	0	0	0	0	0	0	0	0	0	0	0
HIST1H3D	3	0	0	0	0	0	0	0	0	0	0	0	0	-0.235596	-0.235596	-0.235596	0	0	0	0	0	0	0	0	0	0	0	0	0	0	0	0	0	0	0	0	0	0	0	0	0	0	0	0	0	0	0	0	0
PDSS1	1	0	0	0	0	0	0	0	0	0	0	0	0	-0.197029	0	0	0	0	0	0	0	0	0	0	0	0	0	0	0	0	0	0	0	0	0	0	0	0	0	0	0	0	0	0	0	0	0	0	0
HES5	1	0	0	0	0	0	0	0	0	0	0	0	-0.342257	0	0	0	0	0	0	0	0	0	0	0	0	0	0	0	0	0	0	0	0	0	0	0	0	0	0	0	0	0	0	0	0	0	0	0	0
ROPN1L	2	0	-0.205934	-0.205934	0	0	0	0	0	0	0	0	0	0	0	0	0	0	0	0	0	0	0	0	0	0	0	0	0	0	0	0	0	0	0	0	0	0	0	0	0	0	0	0	0	0	0	0	0
STK36	2	0	-0.133313	-0.133313	0	0	0	0	0	0	0	0	0	0	0	0	0	0	0	0	0	0	0	0	0	0	0	0	0	0	0	0	0	0	0	0	0	0	0	0	0	0	0	0	0	0	0	0	0
DPCD	2	0	-0.169423	-0.169423	0	0	0	0	0	0	0	0	0	0	0	0	0	0	0	0	0	0	0	0	0	0	0	0	0	0	0	0	0	0	0	0	0	0	0	0	0	0	0	0	0	0	0	0	0
SPA17	2	0	-0.358064	-0.358064	0	0	0	0	0	0	0	0	0	0	0	0	0	0	0	0	0	0	0	0	0	0	0	0	0	0	0	0	0	0	0	0	0	0	0	0	0	0	0	0	0	0	0	0	0
DNAAF2	1	0	0	0	-0.128195	0	0	0	0	0	0	0	0	0	0	0	0	0	0	0	0	0	0	0	0	0	0	0	0	0	0	0	0	0	0	0	0	0	0	0	0	0	0	0	0	0	0	0	0
DNAH5	2	0	0	-0.145563	-0.145563	0	0	0	0	0	0	0	0	0	0	0	0	0	0	0	0	0	0	0	0	0	0	0	0	0	0	0	0	0	0	0	0	0	0	0	0	0	0	0	0	0	0	0	0
TCTN1	1	0	0	0	0	0	-0.186561	0	0	0	0	0	0	0	0	0	0	0	0	0	0	0	0	0	0	0	0	0	0	0	0	0	0	0	0	0	0	0	0	0	0	0	0	0	0	0	0	0	0
IQUB	1	0	0	0	0	0	-0.286731	0	0	0	0	0	0	0	0	0	0	0	0	0	0	0	0	0	0	0	0	0	0	0	0	0	0	0	0	0	0	0	0	0	0	0	0	0	0	0	0	0	0
IFT52	1	0	0	0	0	0	-0.187763	0	0	0	0	0	0	0	0	0	0	0	0	0	0	0	0	0	0	0	0	0	0	0	0	0	0	0	0	0	0	0	0	0	0	0	0	0	0	0	0	0	0
BBS4	5	-0.168528	0	0	0	-0.168528	-0.168528	0	0	0	0	0	0	0	0	0	0	0	0	0	0	0	0	0	0	0	0	0	-0.168528	0	0	0	0	0	0	0	0	0	0	0	0	0	-0.168528	0	0	0	0	0	0
IFT20	6	-0.169746	0	0	0	-0.169746	-0.169746	-0.169746	0	0	0	0	0	0	0	0	0	0	0	0	0	0	0	0	0	0	0	0	0	0	0	0	0	0	0	0	0	0	0	0	0	-0.169746	-0.169746	0	0	0	0	0	0
IFT140	4	-0.270377	0	0	0	-0.270377	-0.270377	-0.270377	0	0	0	0	0	0	0	0	0	0	0	0	0	0	0	0	0	0	0	0	0	0	0	0	0	0	0	0	0	0	0	0	0	0	0	0	0	0	0	0	0
AHI1	3	-0.185248	0	0	0	-0.185248	-0.185248	0	0	0	0	0	0	0	0	0	0	0	0	0	0	0	0	0	0	0	0	0	0	0	0	0	0	0	0	0	0	0	0	0	0	0	0	0	0	0	0	0	0
FNBP1L	2	0	0	0	0	-0.227391	-0.227391	0	0	0	0	0	0	0	0	0	0	0	0	0	0	0	0	0	0	0	0	0	0	0	0	0	0	0	0	0	0	0	0	0	0	0	0	0	0	0	0	0	0
DYNC2LI1	2	0	0	0	0	-0.24841	-0.24841	0	0	0	0	0	0	0	0	0	0	0	0	0	0	0	0	0	0	0	0	0	0	0	0	0	0	0	0	0	0	0	0	0	0	0	0	0	0	0	0	0	0
DZIP1	2	0	0	0	0	-0.293446	-0.293446	0	0	0	0	0	0	0	0	0	0	0	0	0	0	0	0	0	0	0	0	0	0	0	0	0	0	0	0	0	0	0	0	0	0	0	0	0	0	0	0	0	0
TCTN2	2	0	0	0	0	-0.296481	-0.296481	0	0	0	0	0	0	0	0	0	0	0	0	0	0	0	0	0	0	0	0	0	0	0	0	0	0	0	0	0	0	0	0	0	0	0	0	0	0	0	0	0	0
TMEM67	2	0	0	0	0	-0.240357	-0.240357	0	0	0	0	0	0	0	0	0	0	0	0	0	0	0	0	0	0	0	0	0	0	0	0	0	0	0	0	0	0	0	0	0	0	0	0	0	0	0	0	0	0
ARL6	2	0	0	0	0	-0.232402	-0.232402	0	0	0	0	0	0	0	0	0	0	0	0	0	0	0	0	0	0	0	0	0	0	0	0	0	0	0	0	0	0	0	0	0	0	0	0	0	0	0	0	0	0
TMEM17	2	0	0	0	0	-0.266241	-0.266241	0	0	0	0	0	0	0	0	0	0	0	0	0	0	0	0	0	0	0	0	0	0	0	0	0	0	0	0	0	0	0	0	0	0	0	0	0	0	0	0	0	0
ABLIM3	2	0	0	0	0	-0.199684	-0.199684	0	0	0	0	0	0	0	0	0	0	0	0	0	0	0	0	0	0	0	0	0	0	0	0	0	0	0	0	0	0	0	0	0	0	0	0	0	0	0	0	0	0
RAB23	2	0	0	0	0	-0.252477	-0.252477	0	0	0	0	0	0	0	0	0	0	0	0	0	0	0	0	0	0	0	0	0	0	0	0	0	0	0	0	0	0	0	0	0	0	0	0	0	0	0	0	0	0
ATXN10	2	0	0	0	0	-0.186332	-0.186332	0	0	0	0	0	0	0	0	0	0	0	0	0	0	0	0	0	0	0	0	0	0	0	0	0	0	0	0	0	0	0	0	0	0	0	0	0	0	0	0	0	0
CCNO	2	0	0	0	0	-0.274792	-0.274792	0	0	0	0	0	0	0	0	0	0	0	0	0	0	0	0	0	0	0	0	0	0	0	0	0	0	0	0	0	0	0	0	0	0	0	0	0	0	0	0	0	0
BBS7	2	0	0	0	0	-0.168214	-0.168214	0	0	0	0	0	0	0	0	0	0	0	0	0	0	0	0	0	0	0	0	0	0	0	0	0	0	0	0	0	0	0	0	0	0	0	0	0	0	0	0	0	0
TTC8	2	0	0	0	0	-0.367237	-0.367237	0	0	0	0	0	0	0	0	0	0	0	0	0	0	0	0	0	0	0	0	0	0	0	0	0	0	0	0	0	0	0	0	0	0	0	0	0	0	0	0	0	0
B9D1	2	0	0	0	0	-0.264186	-0.264186	0	0	0	0	0	0	0	0	0	0	0	0	0	0	0	0	0	0	0	0	0	0	0	0	0	0	0	0	0	0	0	0	0	0	0	0	0	0	0	0	0	0
B9D2	2	0	0	0	0	-0.275846	-0.275846	0	0	0	0	0	0	0	0	0	0	0	0	0	0	0	0	0	0	0	0	0	0	0	0	0	0	0	0	0	0	0	0	0	0	0	0	0	0	0	0	0	0
CELSR3	2	0	0	0	0	-0.175496	-0.175496	0	0	0	0	0	0	0	0	0	0	0	0	0	0	0	0	0	0	0	0	0	0	0	0	0	0	0	0	0	0	0	0	0	0	0	0	0	0	0	0	0	0
OCRL	2	0	0	0	0	-0.19215	-0.19215	0	0	0	0	0	0	0	0	0	0	0	0	0	0	0	0	0	0	0	0	0	0	0	0	0	0	0	0	0	0	0	0	0	0	0	0	0	0	0	0	0	0
RPGRIP1L	2	0	0	0	0	-0.201038	-0.201038	0	0	0	0	0	0	0	0	0	0	0	0	0	0	0	0	0	0	0	0	0	0	0	0	0	0	0	0	0	0	0	0	0	0	0	0	0	0	0	0	0	0
FAM161A	2	0	0	0	0	-0.207606	-0.207606	0	0	0	0	0	0	0	0	0	0	0	0	0	0	0	0	0	0	0	0	0	0	0	0	0	0	0	0	0	0	0	0	0	0	0	0	0	0	0	0	0	0
PIBF1	2	0	0	0	0	-0.236594	-0.236594	0	0	0	0	0	0	0	0	0	0	0	0	0	0	0	0	0	0	0	0	0	0	0	0	0	0	0	0	0	0	0	0	0	0	0	0	0	0	0	0	0	0
ATP6V1D	2	0	0	0	0	-0.265698	-0.265698	0	0	0	0	0	0	0	0	0	0	0	0	0	0	0	0	0	0	0	0	0	0	0	0	0	0	0	0	0	0	0	0	0	0	0	0	0	0	0	0	0	0
TMEM107	2	0	0	0	0	-0.303888	-0.303888	0	0	0	0	0	0	0	0	0	0	0	0	0	0	0	0	0	0	0	0	0	0	0	0	0	0	0	0	0	0	0	0	0	0	0	0	0	0	0	0	0	0
IFT81	3	0	0	0	0	-0.270761	-0.270761	-0.270761	0	0	0	0	0	0	0	0	0	0	0	0	0	0	0	0	0	0	0	0	0	0	0	0	0	0	0	0	0	0	0	0	0	0	0	0	0	0	0	0	0
DYNLL1	3	0	0	0	0	-0.174705	-0.174705	-0.174705	0	0	0	0	0	0	0	0	0	0	0	0	0	0	0	0	0	0	0	0	0	0	0	0	0	0	0	0	0	0	0	0	0	0	0	0	0	0	0	0	0
WDR35	3	0	0	0	0	-0.163719	-0.163719	-0.163719	0	0	0	0	0	0	0	0	0	0	0	0	0	0	0	0	0	0	0	0	0	0	0	0	0	0	0	0	0	0	0	0	0	0	0	0	0	0	0	0	0
WDR19	3	0	0	0	0	-0.245357	-0.245357	-0.245357	0	0	0	0	0	0	0	0	0	0	0	0	0	0	0	0	0	0	0	0	0	0	0	0	0	0	0	0	0	0	0	0	0	0	0	0	0	0	0	0	0
TTC30B	3	0	0	0	0	-0.173868	-0.173868	-0.173868	0	0	0	0	0	0	0	0	0	0	0	0	0	0	0	0	0	0	0	0	0	0	0	0	0	0	0	0	0	0	0	0	0	0	0	0	0	0	0	0	0
TTC30A	3	0	0	0	0	-0.225052	-0.225052	-0.225052	0	0	0	0	0	0	0	0	0	0	0	0	0	0	0	0	0	0	0	0	0	0	0	0	0	0	0	0	0	0	0	0	0	0	0	0	0	0	0	0	0
SSX2IP	3	0	0	0	0	-0.166991	-0.166991	-0.166991	0	0	0	0	0	0	0	0	0	0	0	0	0	0	0	0	0	0	0	0	0	0	0	0	0	0	0	0	0	0	0	0	0	0	0	0	0	0	0	0	0
DYNC2H1	3	0	0	0	0	-0.164482	-0.164482	-0.164482	0	0	0	0	0	0	0	0	0	0	0	0	0	0	0	0	0	0	0	0	0	0	0	0	0	0	0	0	0	0	0	0	0	0	0	0	0	0	0	0	0
IFT122	3	0	0	0	0	-0.19584	-0.19584	-0.19584	0	0	0	0	0	0	0	0	0	0	0	0	0	0	0	0	0	0	0	0	0	0	0	0	0	0	0	0	0	0	0	0	0	0	0	0	0	0	0	0	0
IFT74	3	0	0	0	0	-0.342844	-0.342844	-0.342844	0	0	0	0	0	0	0	0	0	0	0	0	0	0	0	0	0	0	0	0	0	0	0	0	0	0	0	0	0	0	0	0	0	0	0	0	0	0	0	0	0
RFX3	4	0	-0.225388	-0.225388	0	-0.225388	-0.225388	0	0	0	0	0	0	0	0	0	0	0	0	0	0	0	0	0	0	0	0	0	0	0	0	0	0	0	0	0	0	0	0	0	0	0	0	0	0	0	0	0	0
NME5	4	0	-0.21689	-0.21689	0	-0.21689	-0.21689	0	0	0	0	0	0	0	0	0	0	0	0	0	0	0	0	0	0	0	0	0	0	0	0	0	0	0	0	0	0	0	0	0	0	0	0	0	0	0	0	0	0
LRRC6	5	0	-0.320618	-0.320618	-0.320618	-0.320618	-0.320618	0	0	0	0	0	0	0	0	0	0	0	0	0	0	0	0	0	0	0	0	0	0	0	0	0	0	0	0	0	0	0	0	0	0	0	0	0	0	0	0	0	0
CCDC103	5	0	-0.176201	-0.176201	-0.176201	-0.176201	-0.176201	0	0	0	0	0	0	0	0	0	0	0	0	0	0	0	0	0	0	0	0	0	0	0	0	0	0	0	0	0	0	0	0	0	0	0	0	0	0	0	0	0	0
DNAH7	4	0	0	-0.301798	-0.301798	-0.301798	-0.301798	0	0	0	0	0	0	0	0	0	0	0	0	0	0	0	0	0	0	0	0	0	0	0	0	0	0	0	0	0	0	0	0	0	0	0	0	0	0	0	0	0	0
RSPH9	4	0	0	-0.304085	-0.304085	-0.304085	-0.304085	0	0	0	0	0	0	0	0	0	0	0	0	0	0	0	0	0	0	0	0	0	0	0	0	0	0	0	0	0	0	0	0	0	0	0	0	0	0	0	0	0	0
SPEF2	3	0	0	0	-0.409695	-0.409695	-0.409695	0	0	0	0	0	0	0	0	0	0	0	0	0	0	0	0	0	0	0	0	0	0	0	0	0	0	0	0	0	0	0	0	0	0	0	0	0	0	0	0	0	0
UBE2B	3	0	0	0	-0.236675	-0.236675	-0.236675	0	0	0	0	0	0	0	0	0	0	0	0	0	0	0	0	0	0	0	0	0	0	0	0	0	0	0	0	0	0	0	0	0	0	0	0	0	0	0	0	0	0
ZMYND10	3	0	0	0	-0.317393	-0.317393	-0.317393	0	0	0	0	0	0	0	0	0	0	0	0	0	0	0	0	0	0	0	0	0	0	0	0	0	0	0	0	0	0	0	0	0	0	0	0	0	0	0	0	0	0
RSPH1	3	0	0	0	-0.200408	-0.200408	-0.200408	0	0	0	0	0	0	0	0	0	0	0	0	0	0	0	0	0	0	0	0	0	0	0	0	0	0	0	0	0	0	0	0	0	0	0	0	0	0	0	0	0	0
PAX6	2	-0.114407	0	0	0	0	0	0	-0.114407	0	0	0	0	0	0	0	0	0	0	0	0	0	0	0	0	0	0	0	0	0	0	0	0	0	0	0	0	0	0	0	0	0	0	0	0	0	0	0	0
PGAP1	1	0	0	0	0	0	0	0	-0.466722	0	0	0	0	0	0	0	0	0	0	0	0	0	0	0	0	0	0	0	0	0	0	0	0	0	0	0	0	0	0	0	0	0	0	0	0	0	0	0	0
WNT7B	1	0	0	0	0	0	0	0	-0.107531	0	0	0	0	0	0	0	0	0	0	0	0	0	0	0	0	0	0	0	0	0	0	0	0	0	0	0	0	0	0	0	0	0	0	0	0	0	0	0	0
TTC21B	1	0	0	0	0	0	0	0	-0.128876	0	0	0	0	0	0	0	0	0	0	0	0	0	0	0	0	0	0	0	0	0	0	0	0	0	0	0	0	0	0	0	0	0	0	0	0	0	0	0	0
LHX2	1	0	0	0	0	0	0	0	-0.116833	0	0	0	0	0	0	0	0	0	0	0	0	0	0	0	0	0	0	0	0	0	0	0	0	0	0	0	0	0	0	0	0	0	0	0	0	0	0	0	0
EMX1	1	0	0	0	0	0	0	0	-0.132742	0	0	0	0	0	0	0	0	0	0	0	0	0	0	0	0	0	0	0	0	0	0	0	0	0	0	0	0	0	0	0	0	0	0	0	0	0	0	0	0
EMX2	1	0	0	0	0	0	0	0	-0.102116	0	0	0	0	0	0	0	0	0	0	0	0	0	0	0	0	0	0	0	0	0	0	0	0	0	0	0	0	0	0	0	0	0	0	0	0	0	0	0	0
WNT2B	1	0	0	0	0	0	0	0	-0.112829	0	0	0	0	0	0	0	0	0	0	0	0	0	0	0	0	0	0	0	0	0	0	0	0	0	0	0	0	0	0	0	0	0	0	0	0	0	0	0	0
SIX3	1	0	0	0	0	0	0	0	-0.123011	0	0	0	0	0	0	0	0	0	0	0	0	0	0	0	0	0	0	0	0	0	0	0	0	0	0	0	0	0	0	0	0	0	0	0	0	0	0	0	0
FEZF2	2	0	0	0	0	0	0	0	-0.190808	0	0	0	0	0	0	0	0	0	0	0	0	0	0	0	0	0	0	0	-0.190808	0	0	0	0	0	0	0	0	0	0	0	0	0	0	0	0	0	0	0	0
RBFOX2	1	0	0	0	0	0	0	0	0	0	0	0	0	0	0	0	0	0	0	0	0	0	0	0	0	0	0	0	-0.237703	0	0	0	0	0	0	0	0	0	0	0	0	0	0	0	0	0	0	0	0
GRIN3A	1	0	0	0	0	0	0	0	0	0	0	0	0	0	0	0	0	0	0	0	0	0	0	0	0	0	0	0	-0.159354	0	0	0	0	0	0	0	0	0	0	0	0	0	0	0	0	0	0	0	0
TMEM106B	1	0	0	0	0	0	0	0	0	0	0	0	0	0	0	0	0	0	0	0	0	0	0	0	0	0	0	0	-0.141101	0	0	0	0	0	0	0	0	0	0	0	0	0	0	0	0	0	0	0	0
FARP1	1	0	0	0	0	0	0	0	0	0	0	0	0	0	0	0	0	0	0	0	0	0	0	0	0	0	0	0	-0.095284	0	0	0	0	0	0	0	0	0	0	0	0	0	0	0	0	0	0	0	0
SLC9A6	1	0	0	0	0	0	0	0	0	0	0	0	0	0	0	0	0	0	0	0	0	0	0	0	0	0	0	0	-0.204628	0	0	0	0	0	0	0	0	0	0	0	0	0	0	0	0	0	0	0	0
PRKG1	1	0	0	0	0	0	0	0	0	0	0	0	0	0	0	0	0	0	0	0	0	0	0	0	0	0	0	0	-0.30105	0	0	0	0	0	0	0	0	0	0	0	0	0	0	0	0	0	0	0	0
ACSL4	1	0	0	0	0	0	0	0	0	0	0	0	0	0	0	0	0	0	0	0	0	0	0	0	0	0	0	0	-0.285476	0	0	0	0	0	0	0	0	0	0	0	0	0	0	0	0	0	0	0	0
MAP2	1	0	0	0	0	0	0	0	0	0	0	0	0	0	0	0	0	0	0	0	0	0	0	0	0	0	0	0	-0.348725	0	0	0	0	0	0	0	0	0	0	0	0	0	0	0	0	0	0	0	0
MAP6	1	0	0	0	0	0	0	0	0	0	0	0	0	0	0	0	0	0	0	0	0	0	0	0	0	0	0	0	-0.283753	0	0	0	0	0	0	0	0	0	0	0	0	0	0	0	0	0	0	0	0
DCLK1	1	0	0	0	0	0	0	0	0	0	0	0	0	0	0	0	0	0	0	0	0	0	0	0	0	0	0	0	-0.180828	0	0	0	0	0	0	0	0	0	0	0	0	0	0	0	0	0	0	0	0
PAK4	1	0	0	0	0	0	0	0	0	0	0	0	0	0	0	0	0	0	0	0	0	0	0	0	0	0	0	0	-0.209579	0	0	0	0	0	0	0	0	0	0	0	0	0	0	0	0	0	0	0	0
GRIP1	1	0	0	0	0	0	0	0	0	0	0	0	0	0	0	0	0	0	0	0	0	0	0	0	0	0	0	0	-0.113439	0	0	0	0	0	0	0	0	0	0	0	0	0	0	0	0	0	0	0	0
RERE	1	0	0	0	0	0	0	0	0	0	0	0	0	0	0	0	0	0	0	0	0	0	0	0	0	0	0	0	-0.220669	0	0	0	0	0	0	0	0	0	0	0	0	0	0	0	0	0	0	0	0
DCX	1	0	0	0	0	0	0	0	0	0	0	0	0	0	0	0	0	0	0	0	0	0	0	0	0	0	0	0	-0.26953	0	0	0	0	0	0	0	0	0	0	0	0	0	0	0	0	0	0	0	0
CNGB1	2	-0.240279	0	0	0	-0.240279	0	0	0	0	0	0	0	0	0	0	0	0	0	0	0	0	0	0	0	0	0	0	0	0	0	0	0	0	0	0	0	0	0	0	0	0	0	0	0	0	0	0	0
TOPORS	2	-0.199775	0	0	0	-0.199775	0	0	0	0	0	0	0	0	0	0	0	0	0	0	0	0	0	0	0	0	0	0	0	0	0	0	0	0	0	0	0	0	0	0	0	0	0	0	0	0	0	0	0
PRKCI	1	-0.281128	0	0	0	0	0	0	0	0	0	0	0	0	0	0	0	0	0	0	0	0	0	0	0	0	0	0	0	0	0	0	0	0	0	0	0	0	0	0	0	0	0	0	0	0	0	0	0
THY1	1	-0.106095	0	0	0	0	0	0	0	0	0	0	0	0	0	0	0	0	0	0	0	0	0	0	0	0	0	0	0	0	0	0	0	0	0	0	0	0	0	0	0	0	0	0	0	0	0	0	0
CRB1	1	-0.132097	0	0	0	0	0	0	0	0	0	0	0	0	0	0	0	0	0	0	0	0	0	0	0	0	0	0	0	0	0	0	0	0	0	0	0	0	0	0	0	0	0	0	0	0	0	0	0
OLFM3	1	-0.103554	0	0	0	0	0	0	0	0	0	0	0	0	0	0	0	0	0	0	0	0	0	0	0	0	0	0	0	0	0	0	0	0	0	0	0	0	0	0	0	0	0	0	0	0	0	0	0
CEP290	1	-0.138353	0	0	0	0	0	0	0	0	0	0	0	0	0	0	0	0	0	0	0	0	0	0	0	0	0	0	0	0	0	0	0	0	0	0	0	0	0	0	0	0	0	0	0	0	0	0	0
CCDC66	1	-0.119927	0	0	0	0	0	0	0	0	0	0	0	0	0	0	0	0	0	0	0	0	0	0	0	0	0	0	0	0	0	0	0	0	0	0	0	0	0	0	0	0	0	0	0	0	0	0	0
HCN1	1	-0.135148	0	0	0	0	0	0	0	0	0	0	0	0	0	0	0	0	0	0	0	0	0	0	0	0	0	0	0	0	0	0	0	0	0	0	0	0	0	0	0	0	0	0	0	0	0	0	0
[truncated: 18 more columns]
